# Supplementary material for: Eukaryotic initiation factor EIF-3.G augments mRNA translation efficiency to regulate neuronal activity
Source: eLife. 2021 Jul 29;10:e68336. doi: 10.7554/eLife.68336 (PMC8354637; doi:10.7554/eLife.68336)
Supplement: Figure 1—figure supplement 2—source data 1. — Quantification of axonal commissures in strains of the indicated genotypes. [file elife-68336-fig1-figsupp2-data1.xlsx]

## Sheet: Fig1- fig supp 2A
	# of axonal commisures
	juIs14	ju807; juIs14	juIs14; n2420	ju807; juIs14; n2420
1	10	10	11	12
2	11	12	11	14
3	13	11	8	12
4	13	12	13	12
5	13	13	13	15
6	12	12	11	13
7	13	12	13	12
8	11	12	12	13
9	10	13	12	13
10	13	12	13	14
11	15	9	12	7
12	11	11	11	5
13	9	10	9	6
14	10	12	11	6
15	13	11	9	7
16	10	9	10	4
17		10	11	8
18			9
average	11.6875	11.2353	11.0556	10.1765
std dev	1.66208	1.25147	1.55193	3.6612
std error	0.415519	0.303526	0.365794	0.887972
