# Supplementary material for: Eukaryotic initiation factor EIF-3.G augments mRNA translation efficiency to regulate neuronal activity
Source: eLife. 2021 Jul 29;10:e68336. doi: 10.7554/eLife.68336 (PMC8354637; doi:10.7554/eLife.68336)
Supplement: Figure 1—figure supplement 2—source data 2. — Quantification of synaptic puncta in strains of the indicated genotypes. [file elife-68336-fig1-figsupp2-data2.xlsx]

## Sheet: Fig1- fig supp 2B
	# of synaptic puncta per 30uM ant of vulva (nuIs94)
	nuIs94	nuIs94; ju807	nuIs94; n2420	nuIs94; ju807; n2420
1	12	10	12	14
2	13	14	13	12
3	12	11	14	10
4	14	14	12	13
5	13	12	12	12
6	13	13	13	14
7	14	13	14	13
8	11	13	11	12
9	13	12	14	11
10	13	11	11	14
11	14	14	14	11
12	12	12	12
13		10
average	12.8333	12.2308	12.6667	12.3636
std dev	0.937437	1.42325	1.1547	1.36182
std error	0.270615	0.394739	0.333333	0.410603
