# Supplementary material for: Eukaryotic initiation factor EIF-3.G augments mRNA translation efficiency to regulate neuronal activity
Source: eLife. 2021 Jul 29;10:e68336. doi: 10.7554/eLife.68336 (PMC8354637; doi:10.7554/eLife.68336)
Supplement: Figure 1—figure supplement 3—source data 1. — Quantification of convulsions per 60 s in strains of the indicated genotypes. [file elife-68336-fig1-figsupp3-data1.xlsx]

## Sheet: Fig1- fig supp 3A
	strain genotype
#	acr-2(gf)	eif-3.E(0/+); acr-2(gf)	eif-3.H(0/+); acr-2(gf)	eif-3.G(C130Y); acr-2(gf)	eif-3.E(0/+); eif-3.G(C130Y); acr-2(gf)	eif-3.H(0/+); eif-3.G(C130Y); acr-2(gf)
1	17	13	19	1	4	15
2	13	5	19	2	4	2
3	11	9	16	1	5	0
4	1	8	16	2	2	5
5	13	19	15	0	2	0
6	14	16	13	0	2	2
7	18	15	16	2	0	6
8	13	14	3	2	0	4
9	5	12	16	2	1	0
10	16	8	11	2	5	2
11	13	5	20	2	7	0
12	14	16	11	2	5	3
13		13	11		10	4
14		3	4		1	0
15		14	18		1	1
total	148	170	208	18	49	44
sample size	12	15	15	12	15	15
average/ 90s	12.3333	11.3333	13.8667	1.5	3.26667	2.93333
average/ 60s	8.22222	7.55556	9.24444	1	2.17778	1.95556
std deviation	4.84924	4.59908	4.66044	0.797724	2.23437	4.22385
std error	1.39986	1.18748	1.20332	0.230283	0.576913	1.09059
