# Supplementary material for: Eukaryotic initiation factor EIF-3.G augments mRNA translation efficiency to regulate neuronal activity
Source: eLife. 2021 Jul 29;10:e68336. doi: 10.7554/eLife.68336 (PMC8354637; doi:10.7554/eLife.68336)
Supplement: Figure 1—figure supplement 3—source data 2. — Quantification of relative fluorescence intensity in the indicated strains. [file elife-68336-fig1-figsupp3-data2.xlsx]

## Sheet: Fig1- fig supp 3B
Strain: CZ12338
VNC fluorescence								background fluorescence
Replicate	Area	mean	min	max	IntDen	RawIntDen		Replicate	Area	mean	min	max	IntDen	RawIntDen	total background (TB)	IntDen-TB (Adj)	RFU	normalized RFU
1	10.789	18.244	2	52	196.829	5017		1	55.318	6.211	0	20	343.597	8758	67.0105	129.819	12.0325	3.11219
2	13.064	11.216	2	31	146.533	3735		2	55.788	0.132	0	6	7.376	188	1.72445	144.809	11.0845	2.867
3	24.756	21.734	1	67	538.033	13714		3	32.327	6.732	0	20	217.622	5547	166.657	371.376	15.0014	3.8801
4	7.062	7.639	0	24	53.945	1375		4	41.939	0.114	0	6	4.786	122	0.805068	53.1399	7.52477	1.94627
5	15.458	17.706	1	77	273.685	6976		5	71.717	7.724	0	22	553.961	14120	119.398	154.287	9.98107	2.58159
6	12.79	24.301	3	62	310.799	7922		6	37.898	8.155	0	25	309.073	7878	104.302	206.497	16.1452	4.17592
7	23.853	25.738	4	86	613.948	15649		7	49.551	8.335	0	24	412.999	10527	198.815	415.133	17.4038	4.50147
8	22.755	10.395	0	33	236.532	6029		8	57.75	3.325	0	15	192.003	4894	75.6604	160.872	7.06973	1.82857
																Average	12.0304	3.11164
																std dev	3.86625	1
																std error	1.36693	0.353553
Strain: CZ11321
VNC fluorescence								background fluorescence
Replicate	Area	mean	min	max	IntDen	RawIntDen		Replicate	Area	mean	min	max	IntDen	RawIntDen	total background (TB)	IntDen-TB (Adj)	RFU	normalized RFU
1	21.342	14.642	1	43	312.486	7965		1	75.405	5.47	0	21	412.489	10514	116.741	195.745	9.17183	2.37228
1	16.674	23.889	0	87	398.326	10153		2	53.121	5.168	0	17	274.548	6998	86.1712	312.155	18.721	4.84217
2	16.438	18.129	0	63	298.009	7596		3	66.303	4.105	0	17	272.194	6938	67.478	230.531	14.0243	3.62736
3	23.5	20.382	1	109	478.988	12209		4	72.423	5.072	0	17	367.333	9363	119.192	359.796	15.3105	3.96003
4	10.475	14.206	1	38	148.808	3793		5	61.203	5.526	0	19	338.183	8620	57.8848	90.9231	8.68001	2.24507
6	21.382	13.361	1	44	285.69	7282		6	66.695	6.321	0	26	421.591	10746	135.156	150.534	7.04024	1.82095
7	9.808	17.912	1	69	175.683	4478		7	78.229	6.95	0	20	543.722	13859	68.1656	107.517	10.9622	2.83536
8	24.128	20.889	0	68	504.019	12847		8	53.042	7.214	0	23	382.633	9753	174.059	329.96	13.6754	3.53712
																Average	12.1982	3.15504
																std dev	3.91734	1.01322
																std error	1.38499	0.358226
