# Supplementary material for: Eukaryotic initiation factor EIF-3.G augments mRNA translation efficiency to regulate neuronal activity
Source: eLife. 2021 Jul 29;10:e68336. doi: 10.7554/eLife.68336 (PMC8354637; doi:10.7554/eLife.68336)
Supplement: Figure 1—source data 1. — Quantification of convulsions per 60 s in strains of the indicated genotypes. [file elife-68336-fig1-data1.xlsx]

## Sheet: Figure 1C
	strain genotype
	wt	acr-2(gf)	eif-3.G(C130Y); acr-2(gf)	eif-3.G(C127Y); acr-2(gf)	eif-3.G(C130Y/+); acr-2(gf)	acr-2(gf); Ex[Peif3g::eif3g(ju807)]
1	0	10.6667	0	1.33333	5.33333	4.66667
2	0	10.6667	0.666667	0.666667	2.66667	0.666667
3	0	9.33333	0	0	8	2.66667
4	0	7.33333	0	0	2.66667	0
5	0	10.6667	0	0.666667	4	1.33333
6	0	10	0	0.666667	4.66667	3.33333
7	0	5.33333	0	0	5.33333	4
8	0	13.3333	0	0	5.33333	1.33333
9	0	10.6667	0	0	8	6.66667
10	0	10	0	0.666667	8.66667	10
11	0	10	2	0	8.66667	0.666667
12	0	17.3333	0.666667	0	5.33333	2
13	0	6.66667	1.33333	0.666667	0.666667	2
14	0	10	0	0.666667	7.33333	1.33333
15	0	13.3333	1.33333	0	7.33333	4.66667
mean convulsions/60s	0	10.3556	0.4	0.355556	5.6	3.02222
std dev	0	2.88253	0.657074	0.426627	2.41424	2.66508
std error	0	0.720633	0.164268	0.110155	0.623355	0.66627
