# Supplementary material for: Eukaryotic initiation factor EIF-3.G augments mRNA translation efficiency to regulate neuronal activity
Source: eLife. 2021 Jul 29;10:e68336. doi: 10.7554/eLife.68336 (PMC8354637; doi:10.7554/eLife.68336)
Supplement: Figure 1—source data 2. — Quantification of convulsions per 60 s in the indicated strains. [file elife-68336-fig1-data2.xlsx]

## Sheet: Figure 1E
	Strain
	N2	CZ21759	CZ23125/CZ23126	CZ22980	CZ23791	CZ22982/CZ22983	CZ27881/CZ27882
1	0	0	3.33333	0.666667	0	7.33333	0
2	0	2.66667	6.66667	2.66667	0.666667	6	8.66667
3	0	2.66667	13.3333	2.66667	2.66667	4	11.3333
4	0	0	6	1.33333	2	4	8.66667
5	0	0	8.66667	2	0	5.33333	10
6	0	0	6.66667	0	1.33333	6.66667	11.3333
7	0	0	10.6667	2	0.666667	3.33333	8.66667
8	0	0	12.6667	0.666667	0	6	8.66667
9	0	0	6.66667	1.33333	2	5.33333	9.33333
10	0	0.666667	7.33333	0	1.33333	4.66667	6
11	0	0	7.33333	2	2.66667	6.66667	8
12	0	0	2	0	1.33333	4	3.33333
13	0	0	0	1.33333	0.666667	8	6.66667
14	0	0	2.66667	2.66667	0	5.33333	8.66667
15	0	0	12.6667	3.33333	2.66667	6	12.6667
16			12			3.33333	6.66667
17			5.33333			10.6667	11.3333
18			1.33333			8.66667	7.33333
19			1.33333			6	8
20			12			6.66667	0.666667
21			10.6667			0.666667	2
22			8.66667			2.66667	2
23			3.33333			12	5.33333
24			9.33333			6	2.66667
25			7.33333			6.66667	6
26			6			4	6
27			3.33333			13.3333	6
28			8.66667			3.33333	6.66667
29			5.33333			8.66667	10
30			8			10	6.66667
mean convulsions/60s	0	0.4	6.97778	1.51111	1.2	6.17778	6.97778
std dev	0	0.93605	3.72105	1.0461	0.979796	2.80631	3.09073
std error	0	0.241687	0.679368	0.261525	0.244949	0.512359	0.772682
