# Supplementary material for: Eukaryotic initiation factor EIF-3.G augments mRNA translation efficiency to regulate neuronal activity
Source: eLife. 2021 Jul 29;10:e68336. doi: 10.7554/eLife.68336 (PMC8354637; doi:10.7554/eLife.68336)
Supplement: Figure 1—source data 3. — Quantification of convulsions per 60 s in strains. Strain name or genotype is indicated in top row. [file elife-68336-fig1-data3.xlsx]

## Sheet: Figure 1F
	Strain or genotype
	N2	CZ22197	MT6241	CZ21759	eif-3.G(C130Y/+); acr-2(gf)	CZ23310	CZ25714
1	0	0	10.6667	2	7.33333	10	0
2	0	0	10.6667	0	1.33333	8.66667	0
3	0	0	9.33333	1.33333	3.33333	12	0
4	0	0	7.33333	0.666667	6	10	0.666667
5	0	0	10.6667	1.33333	2	12.6667	6
6	0	0	10	0.666667	8.66667	10.6667	1.33333
7	0	0	5.33333	0	10.6667	10.6667	0.666667
8	0	0	13.3333	1.33333	2	6	0.666667
9	0	0	10.6667	1.33333	9.33333	10.6667	0
10	0	0	10	0	4	6.66667	0.666667
11	0	0	10	0	8	9.33333	0
12	0	0	17.3333	0.666667	4.66667	8.66667	0
13	0	0	7.33333	0	2.66667	8.66667	0
14	0	0	14	0	8	6.66667	2
15	0	0	12	0	8.66667	7.33333	0.666667
Avg	0	0	10.5778	0.622222	5.77778	9.24444	0.844444
Std Dev	0	0	2.90448	0.68853	3.09292	1.98193	1.54235
Std Error	0	0	0.749932	0.172133	0.773229	0.495482	0.385587
