# Supplementary material for: Eukaryotic initiation factor EIF-3.G augments mRNA translation efficiency to regulate neuronal activity
Source: eLife. 2021 Jul 29;10:e68336. doi: 10.7554/eLife.68336 (PMC8354637; doi:10.7554/eLife.68336)
Supplement: Figure 2—source data 1. — Quantification of convulsions per 60 s in the indicated strains. [file elife-68336-fig2-data1.xlsx]

## Sheet: Figure 2A
	strain
	MT6241	CZ21759	CZ24063	CZ24729	CZ24651	CZ24652	CZ28107	CZ28497
1	13.3333	0	0	14.6667	0	4	3.33333	0
2	8	2.66667	0	9.33333	0	8	4	0.666667
3	9.33333	2.66667	0	9.33333	0	0	4	1.33333
4	12.6667	0	0	8	0	5.33333	8	0
5	13.3333	0	0	5.33333	0	4	3.33333	0
6	9.33333	0	0	8	0	2	4	0
7	9.33333	0	0	10	0	6.66667	4.66667	2.66667
8	10	0	0	10	0	1.33333	1.33333	0
9	11.3333	0	0	4.66667	0	5.33333	1.33333	0
10	9.33333	0.666667	0	8	0	4	2	0.666667
11	6	0	0	9.33333	0	0	2.66667	2
12	12.6667	0	0	9.33333	0	10	6	0.666667
13	9.33333	0	0	7.33333	0	2	4	0
14	10	0	0	10	0	3.33333	0.666667	0
15	8.66667	0	0	11.3333	0	5.33333	2.66667	0
per 60s	10.1778	0.4	0	8.97778	0	4.08889	3.46667	0.533333
std dev	2.10014	0.93605	0	2.37536	0	2.82693	1.88898	0.843274
std error	0.542253	0.241687	0	0.613315	0	0.72991	0.487733	0.217732
