# Supplementary material for: Eukaryotic initiation factor EIF-3.G augments mRNA translation efficiency to regulate neuronal activity
Source: eLife. 2021 Jul 29;10:e68336. doi: 10.7554/eLife.68336 (PMC8354637; doi:10.7554/eLife.68336)
Supplement: Figure 2—source data 2. — Quantification of relative fluorescence intensity in the indicated strains. [file elife-68336-fig2-data2.xlsx]

## Sheet: Figure 2B
CZ24063
VNC fluorescence											background fluorescence
Replicate	Area	mean	min	max	IntDen	RawIntDen	Avg Area	Avg IntDen			Replicate	Area	mean	min	max	IntDen	RawIntDen	total background (TB)	IntDen-TB (Adj)	AU	norm. AU
1	7.027	39.061	10	90	274.479	62966	7.011	278.342			1	13.143	0.815	0	10	10.706	2456	5.71396	272.628	38.8858	0.948285
1	5.911	36.839	8	91	217.757	49954	9.66433	395.169			2	19.337	0.691	0	7	13.356	3064	6.67805	388.491	40.1984	0.980295
1	8.095	42.346	13	83	342.791	78637	11.01	457.971			3	10.479	1.039	0	8	10.889	2498	11.4394	446.532	40.5569	0.989038
2	8.614	41.155	6	91	354.5	81323	10.9357	427.63			4	23.871	1.278	0	11	30.518	7001	13.9758	413.654	37.8262	0.922444
2	11.744	41.094	8	95	482.589	110707	10.1933	406.382			5	10.558	2.24	0	14	23.653	5426	22.8331	383.549	37.6274	0.917598
2	8.635	40.347	7	99	348.418	79928	9.936	512.754			6	6.029	1.846	0	13	11.129	2553	18.3419	494.412	49.7597	1.21346
3	12.812	41.724	11	85	534.554	122628	9.70333	448.184			7	9.102	3.371	0	15	30.68	7038	32.7099	415.474	42.8176	1.04417
3	10.288	40.857	12	83	420.323	96423	9.94033	431.196			8	6.26	2.999	0	14	18.775	4307	29.8111	401.385	40.3794	0.984709
3	9.93	42.198	14	84	419.037	96128													Average	41.0064
4	12.633	42.232	10	98	533.504	122387													std dev	3.91293
4	10.915	36.911	6	90	402.89	92424													std error	1.23738
4	9.259	37.423	6	82	346.496	79487
5	8.596	40.701	6	84	349.879	80263
5	10.227	39.948	8	87	408.531	93718
5	11.757	39.189	8	91	460.736	105694
6	8.618	52.702	13	111	454.185	104191
6	10.083	51.765	12	104	521.93	119732
6	11.107	50.611	11	107	562.148	128958
7	11.212	39.99	8	91	448.361	102855
7	9.154	48.14	11	101	440.68	101093
7	8.744	52.091	20	104	455.51	104495
8	12.223	41.185	10	103	503.408	115483
8	10.161	40.664	10	88	413.196	94788
8	7.437	50.692	17	107	376.984	86481
CZ24729
VNC fluorescence											background fluorescence
Replicate	Area	mean	min	max	IntDen	RawIntDen	Avg Area	Avg IntDen			Replicate	Area	mean	min	max	IntDen	RawIntDen	total background (TB)	IntDen-TB (Adj)	AU	norm. AU
1	11.613	40.884	7	91	474.777	108915	11.607	527.173			1	14.442	0.666	0	7	9.621	2207	7.73026	519.442	44.7525	1.09135
1	10.196	45.248	10	98	461.355	105836	12.9697	644.968			3	7.053	2.331	0	14	16.443	3772	30.2323	614.735	47.3979	1.15587
1	13.012	49.599	12	120	645.386	148053	8.15033	370.458			3	8.736	1.783	0	10	15.575	3573	14.532	355.926	43.6702	1.06496
2	10.771	49.686	14	103	535.191	122774	10.0507	468.876			4	9.852	1.397	0	10	13.762	3157	14.0408	454.836	45.2543	1.10359
2	13.657	46.231	9	100	631.389	144842	11.8367	519.105			5	8.352	1.287	0	10	10.745	2465	15.2338	503.872	42.5687	1.0381
2	14.481	53.057	9	108	768.323	176255	6.99067	367.288			6	7.707	6.8	0	20	52.41	12023	47.5365	319.751	45.7398	1.11543
3	9.486	42.29	9	88	401.142	92023	11.219	491.704			7	16.521	1.125	0	8	18.592	4265	12.6214	479.083	42.7028	1.04137
3	8.37	43.228	11	90	361.797	82997	11.504	557.871			8	17.659	0.829	0	9	14.647	3360	9.53682	548.335	47.6647	1.16237
3	6.595	52.83	16	107	348.436	79932													Average	44.9689
4	10.183	45.153	11	97	459.795	105478													std dev	1.9447
4	10.048	48.022	16	94	482.519	110691													std error	0.614967
4	9.921	46.799	14	96	464.315	106515
5	10.676	44.826	13	92	478.539	109778
5	12.515	41.619	10	83	520.871	119489
5	12.319	45.288	14	95	557.906	127985
6	8.051	53.075	14	111	427.324	98029
6	6.613	55.372	19	117	366.169	84000
6	6.308	48.888	15	114	308.371	70741
7	10.257	45.507	10	105	466.77	107078
7	11.177	44.376	11	95	495.98	113779
7	12.223	41.918	6	112	512.362	117537
8	8.688	47.506	14	106	412.72	94679
8	11.757	45.372	10	109	533.417	122367
8	14.067	51.715	11	125	727.477	166885
CZ24651
VNC fluorescence
Replicate	Area	mean	min	max	IntDen	RawIntDen	Avg Area	Avg IntDen			background fluorescence
1	7.537	44.409	8	119	334.709	76783	8.22733	358.568			Replicate	Area	mean	min	max	IntDen	RawIntDen	total background (TB)	IntDen-TB (Adj)	AU	norm. AU
1	8.592	45.292	10	96	389.146	89271	9.90533	498.193			1	9.05	2.709	0	16	24.516	5624	22.2878	336.28	40.8735	0.996759
1	8.553	41.139	8	91	351.849	80715	9.41	456.831			2	6.486	3.949	0	15	25.614	5876	39.1162	459.077	46.3465	1.13022
2	7.005	43.418	5	100	304.147	69772	8.855	397.196			3	12.118	4.935	0	22	59.803	13719	46.4383	410.392	43.6124	1.06355
2	9.743	47.549	11	119	463.252	106271	10.5957	461.64			4	24.804	0.702	0	9	17.415	3995	6.21621	390.98	44.1536	1.07675
2	12.968	56.073	11	119	727.181	166817	9.41	405.684			5	11.212	1.399	0	10	15.684	3598	14.8233	446.817	42.1698	1.02837
3	9.045	41.735	6	94	377.503	86600	9.971	436.395			6	16.024	1.21	0	11	19.39	4448	11.3861	394.298	41.902	1.02184
3	8.775	51.297	13	112	450.126	103260	11.979	565.255			7	6.521	2.489	0	12	16.229	3723	24.8178	411.577	41.2774	1.00661
3	10.41	52.15	15	102	542.863	124534					8	15.126	2.985	0	16	45.152	10358	35.7573	529.497	44.2021	1.07793
4	9.006	41.988	6	96	378.144	86747													Average	43.0672
4	8.775	43.755	8	107	383.946	88078													std dev	1.83994
4	8.784	48.897	7	104	429.499	98528													std error	0.581839
5	10.113	42.001	9	87	424.769	97443
5	9.843	43.027	9	90	423.509	97154
5	11.831	45.36	7	96	536.642	123107
6	9.176	43.614	7	106	400.205	91808
6	8.762	42.572	8	123	373.008	85569
6	10.292	43.125	3	100	443.84	101818
7	9.939	44.236	7	100	439.66	100859
7	10.122	45.536	8	92	460.911	105734
7	9.852	41.477	7	95	408.614	93737
8	11.456	36.906	3	95	422.79	96989
8	12.519	46.597	11	101	583.373	133827
8	11.962	57.652	13	123	689.601	158196
CZ24652
VNC fluorescence											background fluorescence
Replicate	Area	mean	min	max	IntDen	RawIntDen	Avg Area	Avg IntDen			Replicate	Area	mean	min	max	IntDen	RawIntDen	total background (TB)	IntDen-TB (Adj)	AU	norm. AU
1	10.654	37.829	10	77	403.017	92453	11.6913	488.886			1	13.348	1.22	0	12	16.281	3735	14.2634	474.623	40.5961	0.989994
1	10.933	41.744	10	87	456.373	104693	11.0663	519.757			2	6.486	0.642	0	6	4.167	956	7.10459	512.652	46.3254	1.12971
1	13.487	45.026	14	88	607.269	139309	11.71	401.288			3	13.474	0.75	0	16	10.105	2318	8.7825	392.505	33.5188	0.817403
2	11.194	43.576	12	95	487.798	111902	12.7333	644.802			4	4.895	0.848	0	7	4.15	952	10.7979	634.004	49.7909	1.21422
2	9.669	46.168	10	102	446.382	102401	11.7403	485.735			5	33.587	0.792	0	11	26.595	6101	9.29834	476.437	40.5812	0.98963
2	12.336	50.67	7	115	625.09	143397	12.9367	595.032			6	26.238	0.732	0	9	19.193	4403	9.46964	585.562	45.2638	1.10382
3	10.937	33.703	4	82	368.61	84560	10.4427	379.178			7	14.42	0.806	0	13	11.622	2666	8.41679	370.761	35.5045	0.865826
3	10.758	34.61	5	89	372.35	85418	12.3557	660.634			8	23.614	1.59	0	12	37.541	8612	19.6455	640.988	51.8781	1.26512
3	13.435	34.455	5	81	462.903	106191													Average	42.9323
4	12.271	42.822	10	89	525.47	120544													std dev	6.53331
4	13.492	54.239	10	114	731.776	167871													std error	2.06601
4	12.437	54.449	17	104	677.16	155342
5	11.73	38.456	7	90	451.103	103484
5	12.65	42.328	10	98	535.457	122835
5	10.841	43.413	8	102	470.645	107967
6	10.484	44.805	11	90	469.725	107756
6	14.865	46.958	11	96	698.014	160126
6	13.461	45.862	15	99	617.357	141623
7	10.043	36.153	5	80	363.1	83296
7	10.213	36.344	7	77	371.204	85155
7	11.072	36.418	5	86	403.23	92502
8	11.199	47.77	11	97	534.964	122722
8	11.853	53.995	15	122	639.976	146812
8	14.015	57.58	13	137	806.962	185119
