# Supplementary material for: Eukaryotic initiation factor EIF-3.G augments mRNA translation efficiency to regulate neuronal activity
Source: eLife. 2021 Jul 29;10:e68336. doi: 10.7554/eLife.68336 (PMC8354637; doi:10.7554/eLife.68336)
Supplement: Figure 2—source data 3. — Quantification of polysome to monosome ratios in wildtype(N2) and strains of the indicated genotypes. [file elife-68336-fig2-data3.xlsx]

## Sheet: Figure 2C
	absorbance values for traces
	N2	CZ22197
	1.07788	1.17676														Rep#1 (12-18-20)- area under curve (Simpson's rule)
	1.07788	1.17676														monosome	polysome	polysome/monosome ratio
	1.07788	1.17676													N2	3354.51	8008.75	2.38746
	1.07788	1.17676													ju807	3081.36	8358.86	2.71272
	1.07788	1.17676													n2420	3701.76	11813.3	3.19127
	1.07788	1.17676													ju807;n2420	3341.57	9657.26	2.89004
	1.07788	1.17676
	1.07788	1.17676
	1.07788	1.17554														Rep#2 (11-20-20)- area under curve (Simpson's rule)
	1.0791	1.17554														monosome	polysome	polysome/monosome ratio
	1.0791	1.17554													N2	2694.24	8338.46	3.09492
	1.0791	1.17554													ju807	3050.61	9966.85	3.26716
	1.0791	1.17554													n2420	2690.21	8212.73	3.05282
	1.0791	1.17554													ju807;n2420	2759.63	10615.7	3.84678
	1.0791	1.17554
	1.0791	1.17554
	1.0791	1.17554														polysome::monosome ratios
	1.0791	1.17554														rep#1	rep#2	polysome/monosome ratio	std dev	polysome/monosome ratio
	1.0791	1.17432													N2	2.38746	3.09492	2.74119	0.500248	0.353729
	1.0791	1.17432													ju807	2.71272	3.26716	2.98994	0.39205	0.277221
	1.0791	1.17432													n2420	3.19127	3.05282	3.12205	0.0978996	0.0692254
	1.07788	1.17432													ju807;n2420	2.89004	3.84678	3.36841	0.676517	0.47837
	1.07788	1.17432
	1.07788	1.17432
	1.07788	1.17432
	1.07788	1.17432
	1.07788	1.17432
	1.07666	1.17432
	1.07666	1.17432
	1.07544	1.1731
	1.07544	1.1731
	1.07544	1.1731
	1.07544	1.1731
	1.07422	1.1731
	1.07422	1.1731
	1.07422	1.1731
	1.07422	1.1731
	1.07422	1.1731
	1.073	1.1731
	1.073	1.1731
	1.073	1.1731
	1.073	1.1731
	1.073	1.1731
	1.073	1.1731
	1.073	1.1731
	1.073	1.1731
	1.07422	1.17188
	1.07422	1.17188
	1.07422	1.17188
	1.07422	1.17188
	1.07422	1.17188
	1.07422	1.17188
	1.07422	1.17188
	1.07422	1.17188
	1.07544	1.17188
	1.07544	1.17188
	1.07544	1.17188
	1.07544	1.17188
	1.07544	1.17188
	1.07544	1.17188
	1.07422	1.17188
	1.07422	1.17188
	1.07422	1.17065
	1.07422	1.17065
	1.07422	1.17065
	1.07422	1.17065
	1.07422	1.17065
	1.07422	1.17065
	1.073	1.17065
	1.073	1.17065
	1.073	1.17065
	1.073	1.17065
	1.073	1.17065
	1.073	1.17065
	1.07178	1.17065
	1.07178	1.17065
	1.07178	1.17065
	1.073	1.17065
	1.073	1.17065
	1.073	1.17065
	1.07178	1.17065
	1.07178	1.16943
	1.07178	1.16943
	1.07178	1.16943
	1.07178	1.16943
	1.07178	1.16943
	1.07178	1.16943
	1.07178	1.16943
	1.07178	1.16943
	1.07178	1.16943
	1.07178	1.16943
	1.07178	1.16943
	1.07178	1.16943
	1.073	1.16943
	1.073	1.16821
	1.073	1.16821
	1.073	1.16821
	1.073	1.16821
	1.073	1.16821
	1.073	1.16821
	1.073	1.16821
	1.07178	1.16821
	1.07178	1.16821
	1.07178	1.16821
	1.07178	1.16821
	1.07178	1.16821
	1.07178	1.16821
	1.07178	1.16821
	1.07178	1.16821
	1.07178	1.16821
	1.07178	1.16821
	1.07178	1.16821
	1.07178	1.16699
	1.07178	1.16699
	1.07178	1.16699
	1.07178	1.16577
	1.07178	1.16577
	1.07178	1.16455
	1.07178	1.16455
	1.07178	1.16333
	1.07178	1.16333
	1.073	1.16211
	1.073	1.16211
	1.073	1.16211
	1.073	1.16211
	1.073	1.16333
	1.07178	1.16333
	1.07178	1.16333
	1.07178	1.16455
	1.073	1.16455
	1.073	1.16577
	1.073	1.16577
	1.073	1.16699
	1.073	1.16821
	1.073	1.16821
	1.073	1.16943
	1.073	1.17065
	1.07178	1.17188
	1.07178	1.1731
	1.07178	1.17432
	1.07178	1.17554
	1.07178	1.17676
	1.07178	1.17798
	1.07178	1.17798
	1.07178	1.1792
	1.07178	1.18042
	1.07178	1.18042
	1.07178	1.18042
	1.07178	1.1792
	1.07178	1.17798
	1.07056	1.17798
	1.07056	1.17798
	1.07056	1.1792
	1.07056	1.17798
	1.07056	1.17798
	1.07056	1.17676
	1.07056	1.17554
	1.07056	1.1731
	1.07056	1.1731
	1.07056	1.17188
	1.07056	1.17065
	1.07056	1.17065
	1.07056	1.16821
	1.07056	1.16821
	1.07056	1.16699
	1.07056	1.16699
	1.07056	1.16699
	1.07056	1.16577
	1.07056	1.16577
	1.07056	1.16455
	1.07056	1.16333
	1.07056	1.16333
	1.07056	1.16333
	1.07056	1.16333
	1.07056	1.16333
	1.07056	1.16333
	1.07056	1.16333
	1.07056	1.16333
	1.07056	1.16333
	1.07056	1.16333
	1.07056	1.16333
	1.07056	1.16333
	1.07056	1.16211
	1.07056	1.16211
	1.06934	1.16211
	1.06934	1.16211
	1.06934	1.16211
	1.06934	1.16211
	1.06934	1.16211
	1.06934	1.16211
	1.06934	1.16211
	1.06934	1.16089
	1.06934	1.16089
	1.06934	1.16089
	1.06934	1.15967
	1.06934	1.15967
	1.06934	1.15845
	1.06812	1.15845
	1.06812	1.15723
	1.06812	1.15723
	1.06812	1.15723
	1.06812	1.15601
	1.06812	1.15479
	1.06812	1.15479
	1.06812	1.15356
	1.06934	1.15234
	1.06934	1.15234
	1.06934	1.15234
	1.06812	1.15112
	1.06812	1.15112
	1.06812	1.15112
	1.06812	1.15112
	1.06812	1.15112
	1.06812	1.15112
	1.06812	1.1499
	1.06812	1.1499
	1.06812	1.1499
	1.06812	1.1499
	1.06812	1.1499
	1.06812	1.1499
	1.06812	1.1499
	1.06812	1.1499
	1.06812	1.1499
	1.06812	1.1499
	1.06812	1.14868
	1.06812	1.1499
	1.06812	1.1499
	1.06812	1.1499
	1.06812	1.14868
	1.06689	1.14868
	1.06689	1.14868
	1.06689	1.14868
	1.06689	1.14868
	1.06689	1.14746
	1.06812	1.14746
	1.06812	1.14746
	1.06812	1.14746
	1.06812	1.14624
	1.06812	1.14624
	1.06812	1.14624
	1.06812	1.14624
	1.06812	1.14624
	1.06689	1.14502
	1.06689	1.14502
	1.06689	1.1438
	1.06689	1.1438
	1.06689	1.1438
	1.06689	1.1438
	1.06689	1.1438
	1.06689	1.1438
	1.06689	1.1438
	1.06689	1.1438
	1.06689	1.1438
	1.06689	1.1438
	1.06689	1.14258
	1.06689	1.14258
	1.06689	1.14258
	1.06689	1.14136
	1.06689	1.14136
	1.06689	1.14136
	1.06689	1.14136
	1.06689	1.14136
	1.06689	1.14136
	1.06689	1.14136
	1.06689	1.14136
	1.06689	1.14136
	1.06689	1.14136
	1.06567	1.14136
	1.06567	1.14136
	1.06567	1.14014
	1.06567	1.14014
	1.06689	1.14014
	1.06689	1.14014
	1.06567	1.14014
	1.06567	1.13892
	1.06567	1.13892
	1.06567	1.13892
	1.06567	1.14014
	1.06567	1.14014
	1.06567	1.13892
	1.06567	1.13892
	1.06567	1.13892
	1.06567	1.13892
	1.06567	1.1377
	1.06689	1.1377
	1.06689	1.1377
	1.06689	1.13647
	1.06689	1.13647
	1.06689	1.13647
	1.06567	1.13647
	1.06567	1.13647
	1.06567	1.13647
	1.06567	1.13647
	1.06567	1.13647
	1.06567	1.13647
	1.06567	1.13647
	1.06567	1.13647
	1.06567	1.13647
	1.06445	1.13647
	1.06323	1.13647
	1.06323	1.13647
	1.06201	1.13647
	1.06079	1.1377
	1.05957	1.1377
	1.05957	1.13647
	1.05957	1.13647
	1.05957	1.13525
	1.05957	1.13525
	1.05957	1.13525
	1.06079	1.13525
	1.06079	1.13525
	1.06201	1.13403
	1.06323	1.13403
	1.06445	1.13403
	1.06567	1.13403
	1.06689	1.13281
	1.06812	1.13281
	1.06934	1.13281
	1.07056	1.13281
	1.07178	1.13281
	1.073	1.13159
	1.07422	1.13159
	1.07544	1.13159
	1.07666	1.13159
	1.07788	1.13037
	1.07788	1.13037
	1.0791	1.13037
	1.08032	1.13037
	1.08154	1.13037
	1.08154	1.13037
	1.08154	1.13037
	1.08276	1.13037
	1.08276	1.13037
	1.08154	1.13037
	1.08154	1.13037
	1.08154	1.13037
	1.08032	1.12915
	1.08032	1.12915
	1.0791	1.12915
	1.07788	1.12915
	1.07666	1.12915
	1.07666	1.12915
	1.07544	1.12793
	1.07422	1.12793
	1.07422	1.12793
	1.073	1.12793
	1.07178	1.12793
	1.07178	1.12793
	1.07056	1.12793
	1.07056	1.12671
	1.06934	1.12671
	1.06812	1.12671
	1.06812	1.12671
	1.06812	1.12671
	1.06812	1.12671
	1.06689	1.12671
	1.06689	1.12671
	1.06689	1.12549
	1.06689	1.12549
	1.06812	1.12549
	1.06812	1.12549
	1.06812	1.12549
	1.06812	1.12549
	1.06812	1.12549
	1.06812	1.12549
	1.06812	1.12549
	1.06812	1.12427
	1.06934	1.12427
	1.06934	1.12427
	1.06934	1.12427
	1.06934	1.12427
	1.06934	1.12427
	1.06934	1.12427
	1.06934	1.12305
	1.06934	1.12305
	1.06812	1.12305
	1.06812	1.12305
	1.06812	1.12305
	1.06689	1.12305
	1.06689	1.12305
	1.06567	1.12305
	1.06567	1.12305
	1.06567	1.12305
	1.06567	1.12305
	1.06445	1.12305
	1.06323	1.12183
	1.06323	1.12183
	1.06323	1.12183
	1.06201	1.12183
	1.06201	1.12183
	1.06201	1.12183
	1.06079	1.12061
	1.06079	1.12061
	1.06079	1.12061
	1.06079	1.12061
	1.06079	1.12061
	1.06079	1.12061
	1.06079	1.12061
	1.06079	1.12061
	1.05957	1.11938
	1.05957	1.11938
	1.05957	1.11938
	1.06079	1.11816
	1.06079	1.11816
	1.06079	1.11816
	1.06079	1.11816
	1.06079	1.11816
	1.06079	1.11816
	1.06079	1.11816
	1.06079	1.11816
	1.06079	1.11816
	1.06079	1.11816
	1.06079	1.11816
	1.06079	1.11816
	1.06079	1.11694
	1.06079	1.11694
	1.06079	1.11694
	1.06079	1.11694
	1.06079	1.11694
	1.06079	1.11572
	1.06079	1.11572
	1.05957	1.11572
	1.05957	1.11572
	1.05957	1.11572
	1.05957	1.11572
	1.05957	1.11572
	1.05957	1.11572
	1.05957	1.1145
	1.05835	1.1145
	1.05835	1.1145
	1.05835	1.1145
	1.05713	1.1145
	1.05713	1.11328
	1.05713	1.11328
	1.05713	1.11328
	1.05835	1.11328
	1.05713	1.11328
	1.05713	1.11328
	1.05713	1.11328
	1.05713	1.11328
	1.05713	1.11328
	1.05713	1.11206
	1.05713	1.11206
	1.05713	1.11206
	1.05713	1.11206
	1.05835	1.11206
	1.05835	1.11084
	1.05835	1.11084
	1.05713	1.11084
	1.05713	1.11084
	1.05713	1.11084
	1.05713	1.11084
	1.05713	1.11084
	1.05713	1.10962
	1.05713	1.10962
	1.05713	1.10962
	1.05713	1.10962
	1.05713	1.10962
	1.05713	1.10962
	1.05713	1.10962
	1.05713	1.1084
	1.05713	1.1084
	1.05591	1.1084
	1.05591	1.10718
	1.05591	1.10718
	1.05591	1.10596
	1.05713	1.10596
	1.05713	1.10474
	1.05713	1.10474
	1.05591	1.10352
	1.05591	1.10229
	1.05591	1.10229
	1.05591	1.10107
	1.05591	1.10107
	1.05713	1.10107
	1.05713	1.10107
	1.05713	1.10229
	1.05713	1.10229
	1.05713	1.10229
	1.05713	1.10352
	1.05713	1.10352
	1.05713	1.10474
	1.05713	1.10474
	1.05713	1.10596
	1.05713	1.1084
	1.05713	1.10962
	1.05713	1.10962
	1.05713	1.11206
	1.05591	1.11328
	1.05713	1.1145
	1.05713	1.11572
	1.05713	1.11572
	1.05713	1.11694
	1.05713	1.11694
	1.05713	1.11816
	1.05713	1.11816
	1.05713	1.11816
	1.05591	1.11816
	1.05591	1.11816
	1.05469	1.11816
	1.05469	1.11816
	1.05469	1.11816
	1.05469	1.11694
	1.05469	1.11572
	1.05469	1.11572
	1.05469	1.1145
	1.05469	1.11206
	1.05469	1.11084
	1.05469	1.10962
	1.05469	1.1084
	1.05469	1.1084
	1.05469	1.10718
	1.05469	1.10596
	1.05469	1.10474
	1.05469	1.10352
	1.05469	1.10229
	1.05469	1.10107
	1.05469	1.09985
	1.05469	1.09985
	1.05469	1.09863
	1.05469	1.09863
	1.05469	1.09863
	1.05469	1.09741
	1.05469	1.09741
	1.05469	1.09741
	1.05469	1.09741
	1.05469	1.09741
	1.05347	1.09741
	1.05347	1.09741
	1.05347	1.09741
	1.05347	1.09741
	1.05347	1.09741
	1.05347	1.09619
	1.05347	1.09619
	1.05347	1.09619
	1.05347	1.09619
	1.05347	1.09619
	1.05347	1.09619
	1.05347	1.09619
	1.05347	1.09497
	1.05347	1.09497
	1.05347	1.09375
	1.05225	1.09375
	1.05225	1.09375
	1.05225	1.09253
	1.05225	1.09253
	1.05225	1.09131
	1.05225	1.09009
	1.05225	1.08887
	1.05225	1.08887
	1.05225	1.08765
	1.05225	1.08643
	1.05225	1.08643
	1.05225	1.08643
	1.05225	1.08521
	1.05225	1.08398
	1.05225	1.08398
	1.05225	1.08398
	1.05225	1.08276
	1.05103	1.08276
	1.05103	1.08276
	1.05103	1.08154
	1.05103	1.08154
	1.05103	1.08154
	1.05103	1.08154
	1.05103	1.08154
	1.05103	1.08154
	1.05103	1.08032
	1.05103	1.08032
	1.05103	1.08032
	1.05103	1.08032
	1.05103	1.08032
	1.05103	1.08032
	1.05103	1.08032
	1.0498	1.0791
	1.0498	1.0791
	1.0498	1.0791
	1.0498	1.0791
	1.0498	1.0791
	1.0498	1.07788
	1.0498	1.07788
	1.0498	1.07788
	1.0498	1.07788
	1.0498	1.07788
	1.0498	1.0791
	1.0498	1.0791
	1.0498	1.07788
	1.04858	1.07788
	1.04858	1.07666
	1.04858	1.07666
	1.04858	1.07544
	1.04858	1.07544
	1.04858	1.07422
	1.04858	1.07422
	1.04858	1.07422
	1.04858	1.07422
	1.04736	1.073
	1.04736	1.073
	1.04736	1.073
	1.04736	1.073
	1.04736	1.073
	1.04736	1.07178
	1.04736	1.07178
	1.04736	1.07178
	1.04736	1.07178
	1.04736	1.07178
	1.04736	1.07178
	1.04736	1.07178
	1.04736	1.073
	1.04736	1.073
	1.04736	1.07178
	1.04736	1.07056
	1.04736	1.06934
	1.04614	1.06812
	1.04614	1.06812
	1.04614	1.06812
	1.04614	1.06812
	1.04614	1.06812
	1.04614	1.06812
	1.04492	1.06689
	1.04492	1.06689
	1.04492	1.06689
	1.04492	1.06567
	1.04492	1.06567
	1.04492	1.06567
	1.04492	1.06567
	1.04492	1.06445
	1.04492	1.06445
	1.04492	1.06323
	1.04492	1.06323
	1.04492	1.06323
	1.04492	1.06323
	1.04492	1.06323
	1.04492	1.06323
	1.04492	1.06323
	1.04492	1.06323
	1.04492	1.06323
	1.0437	1.06201
	1.0437	1.06201
	1.0437	1.06201
	1.0437	1.06201
	1.0437	1.06079
	1.0437	1.06079
	1.0437	1.06079
	1.0437	1.06079
	1.04248	1.06079
	1.04248	1.06079
	1.04248	1.06079
	1.04248	1.05957
	1.04248	1.05957
	1.04248	1.05957
	1.04126	1.05957
	1.04126	1.05957
	1.04126	1.05835
	1.04004	1.05835
	1.03882	1.05713
	1.03882	1.05713
	1.03882	1.05713
	1.0376	1.05713
	1.0376	1.05713
	1.03638	1.05713
	1.03638	1.05713
	1.03638	1.05591
	1.03638	1.05591
	1.03638	1.05591
	1.03638	1.05591
	1.03638	1.05469
	1.0376	1.05469
	1.0376	1.05469
	1.03882	1.05469
	1.04004	1.05347
	1.04126	1.05347
	1.04248	1.05347
	1.0437	1.05347
	1.04492	1.05225
	1.04614	1.05225
	1.04736	1.05225
	1.0498	1.05225
	1.05103	1.05225
	1.05225	1.05103
	1.05225	1.05103
	1.05347	1.05103
	1.05469	1.05103
	1.05591	1.05103
	1.05591	1.0498
	1.05713	1.0498
	1.05713	1.0498
	1.05713	1.0498
	1.05713	1.0498
	1.05713	1.0498
	1.05713	1.0498
	1.05713	1.04858
	1.05591	1.04736
	1.05469	1.04736
	1.05347	1.04736
	1.05225	1.04736
	1.05225	1.04736
	1.0498	1.04736
	1.0498	1.04736
	1.04858	1.04614
	1.04736	1.04614
	1.04614	1.04614
	1.04492	1.04492
	1.0437	1.04492
	1.04248	1.04492
	1.04126	1.04492
	1.04126	1.04492
	1.04004	1.0437
	1.03882	1.0437
	1.03882	1.0437
	1.03882	1.04248
	1.03882	1.04248
	1.0376	1.04248
	1.0376	1.04248
	1.0376	1.04248
	1.0376	1.04248
	1.0376	1.04126
	1.0376	1.04126
	1.03882	1.04126
	1.03882	1.04004
	1.03882	1.04004
	1.03882	1.04004
	1.03882	1.04004
	1.03882	1.04004
	1.03882	1.03882
	1.03882	1.03882
	1.03882	1.03882
	1.03882	1.03882
	1.03882	1.0376
	1.03882	1.0376
	1.03882	1.0376
	1.0376	1.0376
	1.0376	1.0376
	1.03638	1.03638
	1.03638	1.03638
	1.03638	1.03638
	1.03638	1.03638
	1.03516	1.03638
	1.03516	1.03516
	1.03394	1.03516
	1.03394	1.03516
	1.03394	1.03516
	1.03271	1.03516
	1.03271	1.03516
	1.03149	1.03516
	1.03149	1.03516
	1.03149	1.03394
	1.03149	1.03394
	1.03027	1.03394
	1.03027	1.03394
	1.03027	1.03271
	1.03027	1.03271
	1.02905	1.03271
	1.02905	1.03271
	1.02905	1.03271
	1.02905	1.03149
	1.02905	1.03149
	1.03027	1.03149
	1.03027	1.03149
	1.03027	1.03149
	1.03027	1.03149
	1.03027	1.03149
	1.03027	1.03149
	1.03027	1.03027
	1.02905	1.03027
	1.02905	1.03027
	1.02905	1.03027
	1.02905	1.03027
	1.02905	1.02905
	1.02905	1.02905
	1.02905	1.02905
	1.02905	1.02905
	1.02905	1.02905
	1.02905	1.02783
	1.02905	1.02783
	1.02905	1.02661
	1.02905	1.02661
	1.02783	1.02661
	1.02783	1.02661
	1.02661	1.02539
	1.02661	1.02539
	1.02661	1.02539
	1.02661	1.02539
	1.02661	1.02539
	1.02661	1.02417
	1.02661	1.02417
	1.02661	1.02417
	1.02661	1.02417
	1.02539	1.02295
	1.02539	1.02295
	1.02539	1.02295
	1.02539	1.02295
	1.02539	1.02295
	1.02539	1.02173
	1.02539	1.02173
	1.02539	1.02173
	1.02539	1.02173
	1.02539	1.02173
	1.02539	1.02051
	1.02539	1.02051
	1.02539	1.02051
	1.02539	1.02051
	1.02539	1.02051
	1.02417	1.02051
	1.02417	1.01929
	1.02417	1.01929
	1.02417	1.01929
	1.02417	1.01807
	1.02539	1.01807
	1.02539	1.01807
	1.02539	1.01807
	1.02539	1.01685
	1.02539	1.01685
	1.02417	1.01562
	1.02417	1.01562
	1.02417	1.01562
	1.02417	1.0144
	1.02417	1.01318
	1.02417	1.01196
	1.02417	1.01074
	1.02417	1.01074
	1.02295	1.00952
	1.02295	1.00952
	1.02295	1.00952
	1.02295	1.00952
	1.02295	1.01074
	1.02295	1.01074
	1.02295	1.01074
	1.02295	1.01074
	1.02295	1.01196
	1.02417	1.01196
	1.02417	1.01318
	1.02417	1.0144
	1.02417	1.01562
	1.02417	1.01685
	1.02417	1.01807
	1.02417	1.01807
	1.02295	1.01929
	1.02295	1.02051
	1.02295	1.02051
	1.02295	1.02173
	1.02295	1.02173
	1.02295	1.02417
	1.02295	1.02539
	1.02417	1.02539
	1.02417	1.02539
	1.02417	1.02539
	1.02417	1.02539
	1.02417	1.02539
	1.02295	1.02539
	1.02295	1.02417
	1.02173	1.02295
	1.02173	1.02295
	1.02173	1.02051
	1.02295	1.01929
	1.02295	1.01929
	1.02295	1.01807
	1.02173	1.01562
	1.02173	1.0144
	1.02173	1.01318
	1.02173	1.01196
	1.02173	1.01074
	1.02173	1.00952
	1.02173	1.0083
	1.02173	1.00708
	1.02173	1.00708
	1.02051	1.00586
	1.02051	1.00464
	1.02051	1.00464
	1.02051	1.00342
	1.02051	1.00342
	1.02051	1.0022
	1.02051	1.00098
	1.02051	1.00098
	1.02051	0.999756
	1.02051	0.999756
	1.02051	0.999756
	1.02051	0.999756
	1.02051	0.999756
	1.02051	0.999756
	1.02051	0.999756
	1.02051	0.999756
	1.02051	0.999756
	1.02051	0.999756
	1.02051	0.998535
	1.02051	0.998535
	1.02051	0.998535
	1.02051	0.997314
	1.02051	0.997314
	1.01929	0.997314
	1.01929	0.996094
	1.01929	0.996094
	1.01929	0.994873
	1.01929	0.993652
	1.01929	0.993652
	1.01929	0.992432
	1.01929	0.991211
	1.01929	0.991211
	1.01929	0.98999
	1.01929	0.98877
	1.01807	0.98877
	1.01807	0.987549
	1.01807	0.987549
	1.01807	0.986328
	1.01807	0.986328
	1.01807	0.985107
	1.01807	0.985107
	1.01807	0.985107
	1.01807	0.983887
	1.01807	0.983887
	1.01807	0.983887
	1.01807	0.983887
	1.01807	0.982666
	1.01685	0.982666
	1.01685	0.982666
	1.01685	0.982666
	1.01685	0.982666
	1.01685	0.982666
	1.01685	0.981445
	1.01685	0.981445
	1.01685	0.980225
	1.01685	0.980225
	1.01685	0.980225
	1.01685	0.979004
	1.01685	0.979004
	1.01685	0.979004
	1.01685	0.979004
	1.01685	0.979004
	1.01562	0.979004
	1.01562	0.977783
	1.01562	0.977783
	1.01562	0.976562
	1.01562	0.975342
	1.01562	0.975342
	1.01562	0.974121
	1.01562	0.974121
	1.01562	0.9729
	1.01562	0.9729
	1.01562	0.9729
	1.01562	0.97168
	1.0144	0.97168
	1.0144	0.97168
	1.0144	0.97168
	1.0144	0.97168
	1.0144	0.970459
	1.0144	0.969238
	1.0144	0.969238
	1.0144	0.968018
	1.0144	0.968018
	1.0144	0.968018
	1.01318	0.966797
	1.01318	0.966797
	1.01318	0.966797
	1.01318	0.966797
	1.01318	0.965576
	1.01318	0.965576
	1.01318	0.965576
	1.01318	0.965576
	1.01318	0.964355
	1.01318	0.964355
	1.01318	0.964355
	1.01318	0.964355
	1.01318	0.963135
	1.01196	0.963135
	1.01196	0.963135
	1.01196	0.963135
	1.01196	0.963135
	1.01196	0.963135
	1.01196	0.963135
	1.01196	0.963135
	1.01074	0.961914
	1.01074	0.960693
	1.01074	0.960693
	1.01074	0.960693
	1.01074	0.959473
	1.01074	0.959473
	1.01074	0.959473
	1.00952	0.958252
	1.00952	0.958252
	1.00952	0.958252
	1.00952	0.958252
	1.00952	0.958252
	1.00952	0.957031
	1.00952	0.955811
	1.00952	0.955811
	1.00952	0.955811
	1.00952	0.95459
	1.00952	0.95459
	1.00952	0.95459
	1.0083	0.95459
	1.0083	0.95459
	1.0083	0.95459
	1.0083	0.953369
	1.0083	0.953369
	1.0083	0.953369
	1.0083	0.953369
	1.0083	0.953369
	1.00708	0.952148
	1.00708	0.952148
	1.00708	0.952148
	1.00708	0.950928
	1.00708	0.950928
	1.00708	0.950928
	1.00708	0.950928
	1.00708	0.950928
	1.00586	0.949707
	1.00586	0.949707
	1.00464	0.949707
	1.00464	0.949707
	1.00342	0.948486
	1.00342	0.948486
	1.0022	0.948486
	1.00098	0.947266
	0.999756	0.947266
	0.999756	0.947266
	0.998535	0.947266
	0.997314	0.946045
	0.997314	0.946045
	0.997314	0.944824
	0.997314	0.944824
	0.997314	0.944824
	0.998535	0.944824
	0.998535	0.944824
	0.999756	0.943604
	1.00098	0.943604
	1.00098	0.942383
	1.0022	0.942383
	1.00342	0.942383
	1.00464	0.942383
	1.00586	0.942383
	1.00708	0.942383
	1.0083	0.941162
	1.00952	0.941162
	1.01074	0.939941
	1.01196	0.939941
	1.01318	0.939941
	1.0144	0.938721
	1.0144	0.938721
	1.01562	0.938721
	1.01685	0.938721
	1.01807	0.938721
	1.01807	0.9375
	1.01807	0.9375
	1.01807	0.9375
	1.01807	0.9375
	1.01685	0.936279
	1.01562	0.936279
	1.01562	0.936279
	1.01562	0.936279
	1.0144	0.936279
	1.01318	0.935059
	1.01196	0.935059
	1.01074	0.933838
	1.00952	0.933838
	1.0083	0.933838
	1.00708	0.932617
	1.00586	0.932617
	1.00464	0.932617
	1.00342	0.931396
	1.0022	0.931396
	1.0022	0.931396
	1.00098	0.931396
	0.999756	0.931396
	0.998535	0.930176
	0.997314	0.930176
	0.997314	0.930176
	0.996094	0.928955
	0.996094	0.928955
	0.996094	0.928955
	0.996094	0.928955
	0.996094	0.927734
	0.996094	0.927734
	0.996094	0.927734
	0.996094	0.926514
	0.996094	0.926514
	0.996094	0.926514
	0.996094	0.926514
	0.996094	0.926514
	0.996094	0.925293
	0.996094	0.925293
	0.996094	0.925293
	0.996094	0.924072
	0.996094	0.924072
	0.994873	0.924072
	0.994873	0.924072
	0.994873	0.922852
	0.994873	0.922852
	0.994873	0.922852
	0.993652	0.922852
	0.993652	0.921631
	0.992432	0.921631
	0.991211	0.921631
	0.991211	0.921631
	0.991211	0.92041
	0.98999	0.92041
	0.98999	0.92041
	0.98877	0.92041
	0.98877	0.919189
	0.987549	0.919189
	0.987549	0.919189
	0.987549	0.919189
	0.986328	0.917969
	0.986328	0.917969
	0.986328	0.917969
	0.985107	0.917969
	0.985107	0.916748
	0.985107	0.916748
	0.985107	0.916748
	0.985107	0.916748
	0.983887	0.915527
	0.983887	0.915527
	0.983887	0.915527
	0.983887	0.915527
	0.983887	0.915527
	0.983887	0.914307
	0.983887	0.914307
	0.983887	0.914307
	0.983887	0.913086
	0.982666	0.913086
	0.982666	0.913086
	0.982666	0.913086
	0.982666	0.911865
	0.982666	0.910645
	0.982666	0.910645
	0.981445	0.910645
	0.981445	0.910645
	0.981445	0.910645
	0.981445	0.909424
	0.981445	0.909424
	0.980225	0.909424
	0.980225	0.909424
	0.979004	0.908203
	0.979004	0.908203
	0.979004	0.908203
	0.979004	0.908203
	0.977783	0.908203
	0.977783	0.906982
	0.976562	0.906982
	0.976562	0.906982
	0.976562	0.906982
	0.976562	0.905762
	0.975342	0.905762
	0.975342	0.905762
	0.975342	0.905762
	0.975342	0.904541
	0.974121	0.904541
	0.974121	0.90332
	0.974121	0.90332
	0.974121	0.90332
	0.9729	0.9021
	0.9729	0.9021
	0.9729	0.9021
	0.9729	0.9021
	0.9729	0.9021
	0.9729	0.9021
	0.9729	0.900879
	0.9729	0.900879
	0.97168	0.900879
	0.97168	0.900879
	0.97168	0.899658
	0.970459	0.899658
	0.970459	0.899658
	0.970459	0.898438
	0.970459	0.898438
	0.970459	0.897217
	0.970459	0.897217
	0.970459	0.895996
	0.970459	0.894775
	0.969238	0.894775
	0.969238	0.893555
	0.968018	0.893555
	0.968018	0.892334
	0.968018	0.892334
	0.968018	0.892334
	0.968018	0.893555
	0.968018	0.893555
	0.966797	0.893555
	0.966797	0.893555
	0.966797	0.893555
	0.965576	0.893555
	0.965576	0.893555
	0.965576	0.894775
	0.965576	0.894775
	0.965576	0.895996
	0.965576	0.895996
	0.965576	0.897217
	0.965576	0.898438
	0.965576	0.898438
	0.965576	0.899658
	0.965576	0.899658
	0.965576	0.900879
	0.965576	0.9021
	0.965576	0.9021
	0.965576	0.90332
	0.965576	0.904541
	0.964355	0.90332
	0.964355	0.90332
	0.964355	0.90332
	0.964355	0.9021
	0.964355	0.9021
	0.964355	0.900879
	0.964355	0.900879
	0.964355	0.899658
	0.963135	0.899658
	0.963135	0.898438
	0.963135	0.898438
	0.963135	0.897217
	0.961914	0.895996
	0.960693	0.894775
	0.960693	0.893555
	0.960693	0.892334
	0.960693	0.891113
	0.960693	0.889893
	0.960693	0.888672
	0.959473	0.888672
	0.959473	0.887451
	0.958252	0.88623
	0.958252	0.88623
	0.958252	0.88623
	0.958252	0.88501
	0.958252	0.88501
	0.958252	0.883789
	0.958252	0.883789
	0.957031	0.882568
	0.957031	0.881348
	0.957031	0.881348
	0.955811	0.880127
	0.955811	0.878906
	0.955811	0.878906
	0.955811	0.878906
	0.95459	0.878906
	0.95459	0.878906
	0.95459	0.878906
	0.95459	0.878906
	0.95459	0.878906
	0.95459	0.877686
	0.95459	0.877686
	0.953369	0.877686
	0.953369	0.876465
	0.953369	0.876465
	0.953369	0.876465
	0.953369	0.875244
	0.952148	0.874023
	0.952148	0.874023
	0.952148	0.872803
	0.952148	0.872803
	0.952148	0.871582
	0.950928	0.871582
	0.950928	0.870361
	0.950928	0.869141
	0.949707	0.86792
	0.949707	0.86792
	0.949707	0.866699
	0.949707	0.865479
	0.949707	0.864258
	0.949707	0.864258
	0.948486	0.863037
	0.948486	0.863037
	0.948486	0.861816
	0.947266	0.861816
	0.947266	0.861816
	0.947266	0.860596
	0.947266	0.860596
	0.947266	0.860596
	0.947266	0.859375
	0.947266	0.859375
	0.946045	0.859375
	0.946045	0.858154
	0.946045	0.858154
	0.944824	0.858154
	0.944824	0.858154
	0.944824	0.856934
	0.944824	0.856934
	0.944824	0.856934
	0.944824	0.856934
	0.944824	0.858154
	0.943604	0.858154
	0.943604	0.856934
	0.943604	0.855713
	0.943604	0.854492
	0.943604	0.854492
	0.943604	0.853271
	0.942383	0.853271
	0.942383	0.853271
	0.942383	0.852051
	0.942383	0.852051
	0.942383	0.852051
	0.942383	0.85083
	0.942383	0.85083
	0.941162	0.85083
	0.941162	0.849609
	0.941162	0.849609
	0.941162	0.848389
	0.941162	0.848389
	0.941162	0.847168
	0.941162	0.847168
	0.939941	0.847168
	0.939941	0.847168
	0.939941	0.845947
	0.938721	0.844727
	0.938721	0.844727
	0.938721	0.844727
	0.938721	0.844727
	0.938721	0.843506
	0.938721	0.843506
	0.938721	0.842285
	0.9375	0.842285
	0.9375	0.842285
	0.9375	0.842285
	0.9375	0.842285
	0.9375	0.841064
	0.936279	0.841064
	0.936279	0.839844
	0.936279	0.839844
	0.936279	0.839844
	0.936279	0.839844
	0.936279	0.838623
	0.936279	0.838623
	0.936279	0.838623
	0.935059	0.837402
	0.935059	0.837402
	0.935059	0.837402
	0.935059	0.837402
	0.933838	0.836182
	0.933838	0.836182
	0.933838	0.836182
	0.933838	0.836182
	0.932617	0.836182
	0.932617	0.834961
	0.932617	0.83374
	0.932617	0.83374
	0.932617	0.83374
	0.931396	0.83374
	0.931396	0.83252
	0.931396	0.831299
	0.931396	0.831299
	0.931396	0.831299
	0.931396	0.83252
	0.931396	0.83252
	0.930176	0.83252
	0.930176	0.831299
	0.930176	0.831299
	0.930176	0.830078
	0.930176	0.830078
	0.930176	0.830078
	0.930176	0.828857
	0.928955	0.828857
	0.928955	0.828857
	0.928955	0.828857
	0.928955	0.828857
	0.927734	0.828857
	0.927734	0.828857
	0.927734	0.827637
	0.927734	0.827637
	0.927734	0.827637
	0.927734	0.827637
	0.926514	0.827637
	0.926514	0.826416
	0.926514	0.826416
	0.926514	0.825195
	0.926514	0.825195
	0.926514	0.823975
	0.925293	0.823975
	0.925293	0.823975
	0.924072	0.823975
	0.924072	0.823975
	0.922852	0.822754
	0.921631	0.822754
	0.92041	0.821533
	0.92041	0.821533
	0.92041	0.820312
	0.919189	0.820312
	0.917969	0.820312
	0.917969	0.820312
	0.917969	0.819092
	0.917969	0.819092
	0.917969	0.819092
	0.917969	0.817871
	0.919189	0.817871
	0.919189	0.81665
	0.92041	0.81665
	0.92041	0.81665
	0.921631	0.81665
	0.922852	0.81543
	0.924072	0.81543
	0.924072	0.81543
	0.925293	0.81543
	0.926514	0.814209
	0.927734	0.814209
	0.928955	0.814209
	0.930176	0.812988
	0.931396	0.812988
	0.932617	0.812988
	0.933838	0.812988
	0.933838	0.812988
	0.935059	0.812988
	0.935059	0.811768
	0.935059	0.811768
	0.936279	0.810547
	0.935059	0.810547
	0.935059	0.810547
	0.935059	0.809326
	0.933838	0.809326
	0.933838	0.809326
	0.932617	0.809326
	0.931396	0.809326
	0.930176	0.809326
	0.928955	0.809326
	0.927734	0.808105
	0.926514	0.808105
	0.925293	0.808105
	0.924072	0.806885
	0.921631	0.806885
	0.92041	0.806885
	0.919189	0.806885
	0.917969	0.806885
	0.916748	0.805664
	0.916748	0.805664
	0.915527	0.805664
	0.914307	0.805664
	0.914307	0.805664
	0.913086	0.805664
	0.913086	0.804443
	0.911865	0.804443
	0.911865	0.803223
	0.911865	0.803223
	0.911865	0.803223
	0.911865	0.802002
	0.911865	0.802002
	0.911865	0.802002
	0.911865	0.802002
	0.911865	0.802002
	0.911865	0.802002
	0.911865	0.802002
	0.911865	0.800781
	0.911865	0.800781
	0.911865	0.800781
	0.910645	0.800781
	0.910645	0.800781
	0.910645	0.800781
	0.910645	0.799561
	0.909424	0.799561
	0.909424	0.799561
	0.908203	0.79834
	0.908203	0.79834
	0.906982	0.797119
	0.906982	0.797119
	0.905762	0.797119
	0.905762	0.797119
	0.904541	0.795898
	0.90332	0.795898
	0.9021	0.794678
	0.9021	0.794678
	0.9021	0.794678
	0.900879	0.794678
	0.900879	0.793457
	0.899658	0.793457
	0.899658	0.793457
	0.899658	0.793457
	0.898438	0.792236
	0.898438	0.792236
	0.897217	0.792236
	0.897217	0.792236
	0.897217	0.792236
	0.897217	0.791016
	0.897217	0.791016
	0.897217	0.791016
	0.897217	0.789795
	0.895996	0.789795
	0.895996	0.789795
	0.895996	0.789795
	0.895996	0.788574
	0.895996	0.788574
	0.895996	0.788574
	0.895996	0.788574
	0.895996	0.787354
	0.894775	0.787354
	0.894775	0.787354
	0.894775	0.786133
	0.894775	0.786133
	0.894775	0.786133
	0.894775	0.786133
	0.894775	0.786133
	0.893555	0.786133
	0.893555	0.784912
	0.892334	0.784912
	0.892334	0.784912
	0.892334	0.784912
	0.892334	0.784912
	0.892334	0.783691
	0.891113	0.783691
	0.891113	0.783691
	0.889893	0.782471
	0.889893	0.782471
	0.889893	0.782471
	0.888672	0.782471
	0.888672	0.78125
	0.887451	0.78125
	0.887451	0.78125
	0.887451	0.78125
	0.887451	0.78125
	0.887451	0.78125
	0.88623	0.780029
	0.88623	0.780029
	0.88623	0.780029
	0.88623	0.778809
	0.88501	0.778809
	0.88501	0.778809
	0.88501	0.777588
	0.88501	0.777588
	0.88501	0.777588
	0.883789	0.777588
	0.883789	0.776367
	0.883789	0.776367
	0.883789	0.775146
	0.883789	0.773926
	0.883789	0.772705
	0.883789	0.771484
	0.882568	0.770264
	0.882568	0.769043
	0.882568	0.769043
	0.882568	0.767822
	0.882568	0.767822
	0.881348	0.767822
	0.881348	0.767822
	0.881348	0.769043
	0.881348	0.769043
	0.881348	0.769043
	0.881348	0.770264
	0.880127	0.770264
	0.880127	0.770264
	0.880127	0.770264
	0.878906	0.771484
	0.878906	0.773926
	0.878906	0.775146
	0.878906	0.776367
	0.878906	0.777588
	0.878906	0.778809
	0.878906	0.780029
	0.878906	0.78125
	0.878906	0.78125
	0.878906	0.782471
	0.878906	0.782471
	0.878906	0.782471
	0.878906	0.782471
	0.878906	0.782471
	0.877686	0.783691
	0.877686	0.783691
	0.877686	0.783691
	0.877686	0.783691
	0.877686	0.782471
	0.877686	0.78125
	0.877686	0.78125
	0.877686	0.780029
	0.877686	0.778809
	0.877686	0.777588
	0.876465	0.775146
	0.876465	0.773926
	0.875244	0.772705
	0.875244	0.771484
	0.875244	0.770264
	0.875244	0.769043
	0.875244	0.767822
	0.875244	0.766602
	0.875244	0.765381
	0.874023	0.76416
	0.874023	0.762939
	0.874023	0.762939
	0.874023	0.762939
	0.874023	0.761719
	0.872803	0.761719
	0.872803	0.760498
	0.872803	0.760498
	0.872803	0.760498
	0.872803	0.760498
	0.871582	0.760498
	0.871582	0.760498
	0.871582	0.760498
	0.871582	0.760498
	0.871582	0.759277
	0.871582	0.759277
	0.871582	0.759277
	0.871582	0.758057
	0.870361	0.758057
	0.870361	0.758057
	0.870361	0.758057
	0.870361	0.758057
	0.870361	0.758057
	0.870361	0.756836
	0.869141	0.755615
	0.869141	0.755615
	0.869141	0.754395
	0.869141	0.754395
	0.869141	0.753174
	0.869141	0.753174
	0.869141	0.751953
	0.869141	0.750732
	0.86792	0.750732
	0.86792	0.750732
	0.86792	0.749512
	0.86792	0.749512
	0.86792	0.748291
	0.86792	0.74707
	0.86792	0.74707
	0.866699	0.74585
	0.866699	0.744629
	0.866699	0.744629
	0.866699	0.743408
	0.866699	0.743408
	0.866699	0.743408
	0.866699	0.742188
	0.865479	0.742188
	0.865479	0.742188
	0.865479	0.742188
	0.865479	0.740967
	0.864258	0.740967
	0.864258	0.740967
	0.864258	0.739746
	0.864258	0.739746
	0.864258	0.739746
	0.864258	0.739746
	0.863037	0.740967
	0.863037	0.739746
	0.863037	0.739746
	0.863037	0.739746
	0.863037	0.739746
	0.863037	0.739746
	0.863037	0.739746
	0.863037	0.739746
	0.861816	0.739746
	0.861816	0.739746
	0.861816	0.740967
	0.861816	0.743408
	0.861816	0.743408
	0.861816	0.740967
	0.861816	0.737305
	0.861816	0.733643
	0.861816	0.732422
	0.861816	0.732422
	0.860596	0.732422
	0.860596	0.731201
	0.860596	0.731201
	0.860596	0.72998
	0.860596	0.72998
	0.860596	0.72876
	0.860596	0.72876
	0.859375	0.72876
	0.859375	0.72876
	0.859375	0.727539
	0.859375	0.726318
	0.859375	0.726318
	0.859375	0.726318
	0.858154	0.726318
	0.858154	0.725098
	0.858154	0.725098
	0.858154	0.723877
	0.858154	0.723877
	0.858154	0.723877
	0.858154	0.723877
	0.858154	0.723877
	0.856934	0.723877
	0.856934	0.723877
	0.856934	0.722656
	0.856934	0.722656
	0.856934	0.722656
	0.856934	0.721436
	0.856934	0.721436
	0.856934	0.721436
	0.856934	0.721436
	0.856934	0.721436
	0.855713	0.721436
	0.855713	0.721436
	0.855713	0.720215
	0.855713	0.720215
	0.855713	0.718994
	0.855713	0.718994
	0.855713	0.718994
	0.854492	0.718994
	0.854492	0.717773
	0.854492	0.717773
	0.854492	0.717773
	0.854492	0.717773
	0.854492	0.717773
	0.854492	0.717773
	0.853271	0.716553
	0.853271	0.716553
	0.853271	0.716553
	0.853271	0.716553
	0.853271	0.716553
	0.853271	0.716553
	0.853271	0.716553
	0.852051	0.716553
	0.852051	0.716553
	0.852051	0.715332
	0.852051	0.715332
	0.852051	0.715332
	0.85083	0.715332
	0.85083	0.715332
	0.85083	0.715332
	0.85083	0.715332
	0.85083	0.715332
	0.85083	0.714111
	0.85083	0.714111
	0.849609	0.712891
	0.849609	0.712891
	0.849609	0.712891
	0.849609	0.712891
	0.849609	0.71167
	0.849609	0.71167
	0.849609	0.71167
	0.849609	0.71167
	0.849609	0.710449
	0.848389	0.710449
	0.848389	0.710449
	0.848389	0.710449
	0.848389	0.709229
	0.848389	0.709229
	0.847168	0.709229
	0.847168	0.709229
	0.847168	0.708008
	0.845947	0.708008
	0.844727	0.708008
	0.844727	0.708008
	0.842285	0.706787
	0.842285	0.706787
	0.841064	0.706787
	0.839844	0.706787
	0.839844	0.705566
	0.838623	0.705566
	0.837402	0.705566
	0.837402	0.705566
	0.837402	0.704346
	0.838623	0.704346
	0.838623	0.704346
	0.838623	0.703125
	0.839844	0.703125
	0.841064	0.703125
	0.842285	0.703125
	0.842285	0.703125
	0.843506	0.703125
	0.844727	0.703125
	0.845947	0.703125
	0.847168	0.701904
	0.847168	0.701904
	0.848389	0.700684
	0.849609	0.700684
	0.85083	0.700684
	0.85083	0.699463
	0.852051	0.699463
	0.853271	0.699463
	0.853271	0.699463
	0.853271	0.699463
	0.854492	0.699463
	0.854492	0.698242
	0.854492	0.698242
	0.854492	0.698242
	0.854492	0.698242
	0.853271	0.698242
	0.853271	0.698242
	0.853271	0.698242
	0.85083	0.698242
	0.849609	0.697021
	0.849609	0.697021
	0.847168	0.697021
	0.847168	0.697021
	0.844727	0.695801
	0.843506	0.695801
	0.842285	0.695801
	0.841064	0.695801
	0.839844	0.695801
	0.838623	0.69458
	0.837402	0.69458
	0.836182	0.69458
	0.834961	0.69458
	0.83374	0.693359
	0.83252	0.693359
	0.83252	0.693359
	0.831299	0.693359
	0.831299	0.692139
	0.831299	0.692139
	0.831299	0.692139
	0.830078	0.692139
	0.830078	0.692139
	0.830078	0.692139
	0.830078	0.692139
	0.830078	0.690918
	0.830078	0.690918
	0.830078	0.690918
	0.830078	0.690918
	0.830078	0.690918
	0.828857	0.690918
	0.828857	0.689697
	0.828857	0.689697
	0.828857	0.689697
	0.828857	0.688477
	0.828857	0.688477
	0.827637	0.688477
	0.827637	0.688477
	0.826416	0.688477
	0.826416	0.687256
	0.825195	0.687256
	0.825195	0.687256
	0.823975	0.687256
	0.823975	0.687256
	0.822754	0.686035
	0.821533	0.686035
	0.820312	0.686035
	0.820312	0.686035
	0.819092	0.686035
	0.819092	0.684814
	0.817871	0.684814
	0.81665	0.684814
	0.81543	0.684814
	0.81543	0.684814
	0.814209	0.683594
	0.814209	0.683594
	0.812988	0.683594
	0.812988	0.683594
	0.812988	0.683594
	0.812988	0.682373
	0.811768	0.682373
	0.811768	0.682373
	0.811768	0.682373
	0.811768	0.681152
	0.811768	0.681152
	0.811768	0.681152
	0.810547	0.679932
	0.810547	0.679932
	0.810547	0.679932
	0.810547	0.679932
	0.810547	0.679932
	0.810547	0.679932
	0.809326	0.678711
	0.809326	0.678711
	0.809326	0.678711
	0.809326	0.678711
	0.809326	0.67749
	0.809326	0.67749
	0.809326	0.67749
	0.808105	0.67749
	0.808105	0.67749
	0.808105	0.67749
	0.808105	0.67749
	0.806885	0.67627
	0.806885	0.67627
	0.805664	0.67627
	0.805664	0.67627
	0.805664	0.67627
	0.805664	0.67627
	0.804443	0.67627
	0.804443	0.67627
	0.804443	0.675049
	0.804443	0.675049
	0.803223	0.675049
	0.803223	0.675049
	0.803223	0.675049
	0.802002	0.673828
	0.802002	0.673828
	0.802002	0.673828
	0.802002	0.673828
	0.800781	0.672607
	0.800781	0.672607
	0.800781	0.672607
	0.800781	0.671387
	0.800781	0.671387
	0.800781	0.670166
	0.799561	0.668945
	0.799561	0.668945
	0.799561	0.667725
	0.799561	0.666504
	0.799561	0.666504
	0.799561	0.665283
	0.799561	0.665283
	0.79834	0.665283
	0.79834	0.666504
	0.79834	0.666504
	0.79834	0.666504
	0.797119	0.667725
	0.797119	0.667725
	0.797119	0.668945
	0.797119	0.668945
	0.795898	0.670166
	0.795898	0.671387
	0.795898	0.672607
	0.794678	0.672607
	0.794678	0.673828
	0.794678	0.675049
	0.795898	0.67627
	0.795898	0.67627
	0.794678	0.67627
	0.794678	0.67627
	0.793457	0.67749
	0.793457	0.679932
	0.793457	0.682373
	0.793457	0.682373
	0.792236	0.682373
	0.792236	0.682373
	0.792236	0.682373
	0.792236	0.682373
	0.793457	0.681152
	0.793457	0.681152
	0.792236	0.679932
	0.792236	0.678711
	0.792236	0.67627
	0.792236	0.675049
	0.792236	0.673828
	0.792236	0.672607
	0.792236	0.671387
	0.792236	0.671387
	0.792236	0.670166
	0.791016	0.668945
	0.791016	0.667725
	0.791016	0.666504
	0.789795	0.666504
	0.789795	0.665283
	0.788574	0.664062
	0.787354	0.662842
	0.787354	0.661621
	0.787354	0.661621
	0.788574	0.6604
	0.788574	0.6604
	0.788574	0.6604
	0.788574	0.65918
	0.787354	0.65918
	0.787354	0.65918
	0.787354	0.65918
	0.786133	0.65918
	0.786133	0.65918
	0.786133	0.65918
	0.784912	0.65918
	0.784912	0.65918
	0.784912	0.65918
	0.784912	0.65918
	0.784912	0.657959
	0.783691	0.657959
	0.783691	0.657959
	0.783691	0.657959
	0.783691	0.657959
	0.782471	0.657959
	0.782471	0.656738
	0.782471	0.655518
	0.782471	0.655518
	0.782471	0.654297
	0.782471	0.654297
	0.782471	0.653076
	0.78125	0.653076
	0.78125	0.651855
	0.78125	0.651855
	0.78125	0.650635
	0.78125	0.650635
	0.78125	0.649414
	0.780029	0.648193
	0.780029	0.648193
	0.780029	0.648193
	0.780029	0.646973
	0.780029	0.646973
	0.778809	0.645752
	0.778809	0.645752
	0.778809	0.645752
	0.778809	0.644531
	0.777588	0.644531
	0.777588	0.644531
	0.777588	0.643311
	0.777588	0.643311
	0.777588	0.643311
	0.776367	0.643311
	0.776367	0.643311
	0.776367	0.643311
	0.776367	0.64209
	0.776367	0.64209
	0.775146	0.64209
	0.775146	0.64209
	0.775146	0.64209
	0.773926	0.64209
	0.773926	0.640869
	0.773926	0.640869
	0.773926	0.640869
	0.773926	0.639648
	0.773926	0.639648
	0.772705	0.639648
	0.772705	0.639648
	0.772705	0.639648
	0.772705	0.638428
	0.772705	0.637207
	0.771484	0.637207
	0.771484	0.635986
	0.771484	0.635986
	0.771484	0.634766
	0.771484	0.634766
	0.771484	0.634766
	0.770264	0.634766
	0.770264	0.634766
	0.770264	0.634766
	0.770264	0.634766
	0.769043	0.633545
	0.769043	0.632324
	0.769043	0.632324
	0.769043	0.632324
[truncated: 50,049 more rows]
