# Supplementary material for: Eukaryotic initiation factor EIF-3.G augments mRNA translation efficiency to regulate neuronal activity
Source: eLife. 2021 Jul 29;10:e68336. doi: 10.7554/eLife.68336 (PMC8354637; doi:10.7554/eLife.68336)
Supplement: Figure 3—source data 1. — Quantification of convulsions per 60 s in the indicated strains. [file elife-68336-fig3-data1.xlsx]

## Sheet: Figure 3
	strain
	MT6241	CZ23204	CZ28152/CZ28153	CZ23304/CZ23305	CZ28066/ CZ28067	CZ28057/CZ28058	CZ28064/CZ28065
1	8.66667	12	7.33333	11.3333	6.66667	6.66667	4.66667
2	9.33333	11.3333	2.66667	9.33333	0.666667	6.66667	4.66667
3	9.33333	10.6667	6.66667	9.33333	6	10.6667	1.33333
4	6	13.3333	0	6	8	12	2
5	10.6667	11.3333	1.33333	11.3333	8	11.3333	1.33333
6	13.3333	12	0	6.66667	11.3333	8	14
7	12	10.6667	12	9.33333	4.66667	11.3333	1.33333
8	10.6667	16.6667	0	10	7.33333	12	6.66667
9	12	10.6667	1.33333	8.66667	6.66667	10	6.66667
10	13.3333	9.33333	2	10.6667	8.66667	11.3333	2
11	10.6667	6.66667	2	13.3333	1.33333	12.6667	3.33333
12	8	13.3333	4.66667	12	2	10	10
13	10	12.6667	2	8.66667	10	7.33333	10.6667
14	8.66667	10.6667	2	6.66667	2	8.66667	4.66667
15	13.3333	5.33333	2.66667	12.6667	2.66667	4	12
16		6.66667	0.666667	6.66667	4.66667	12.6667	4
17		10	0	3.33333	2	8.66667	4
18		14	2	12.6667	0	9.33333	2
19		5.33333	2	5.33333	7.33333	8	8.66667
20		10	0	4.66667	6	13.3333	1.33333
21		8.66667	0	13.3333	1.33333	4.66667	9.33333
22		13.3333	0.666667	0	7.33333	7.33333	0
23		9.33333	0	8.66667	4.66667	3.33333	0
24		12.6667	0	11.3333	2	14.6667	6.66667
25		7.33333	0	2	6.66667	8	7.33333
26		13.3333	0	8.66667	0.666667	8.66667
27		6.66667	0	8.66667	10	8.66667
28		12.6667	0	1.33333	6.66667	8
29		10	0.666667	11.3333	9.33333	10
30		8.66667	0.666667	12	10	4
Avg	10.4	10.5111	1.77778	8.53333	5.48889	9.06667	5.14667
Std Dev	2.14994	2.75533	2.70848	3.62368	3.31574	2.87465	3.91824
Std Error	0.555111	0.503052	0.494499	0.66159	0.605368	0.524837	0.783648
