# Supplementary material for: Eukaryotic initiation factor EIF-3.G augments mRNA translation efficiency to regulate neuronal activity
Source: eLife. 2021 Jul 29;10:e68336. doi: 10.7554/eLife.68336 (PMC8354637; doi:10.7554/eLife.68336)
Supplement: Figure 4—figure supplement 1—source data 1. — Quantification of band intensities from western blots using the indicated antibodies in each strain. [file elife-68336-fig4-figsupp1-data1.xlsx]

## Sheet: Figure 4- figure supplement 1A
replicate 1					replicate 2					replicate 3						rep 1	rep 2	rep 3
	anti-3XFLAG_rep1					anti-3XFLAG_rep2					anti-3XFLAG_rep3				Sample	IntDen Ratio	IntDen Ratio	IntDen Ratio	Average	std dev	std error
	Area	Mean	IntDen			Area	Mean	IntDen			Area	Mean	IntDen		N2	1.09658	1.14394	0.741982	1.12026	0.0334885	0.0236799
N2	171120	39.169	6702566		N2					N2					CZ26494	5.97694	5.44435	3.73814	5.05314	1.16955	0.675238
CZ26494	62928	214.423	13493209		CZ26494	51084	220.541	11266122		CZ26494	36464	204.73	7465265		CZ26565	5.36299	4.58428	4.1668	4.70469	0.607117	0.350519
CZ26565	62928	231.74	14582948		CZ26565	49248	174.798	8608438		CZ26565	40528	180.939	7333101		CZ26623	2.6315	2.3952	1.17605	2.06759	0.781077	0.450955
CZ26623	52668	178.94	9424393		CZ26623	21240	171.325	3638941		CZ26623	16200	145.027	2349434
	anti-B-actin_rep1					anti-B-actin_rep2					anti-B-actin_rep3
	Area	Mean	IntDen			Area	Mean	IntDen			Area	Mean	IntDen
N2	67424	90.654	6112256		N2					N2
CZ26494	25704	87.829	2257545		CZ26494	133.058	2069325	2069325		CZ26494	11088	180.11	1997055
CZ26565	25704	105.788	2719182		CZ26565	120.744	1877818	1877818		CZ26565	14256	123.449	1759887
CZ26623	38304	93.499	3581375		CZ26623	102.931	1519263	1519263		CZ26623	13824	144.511	1997726
	3XFLAG:actin Ratio					3XFLAG:actin Ratio					3XFLAG:actin Ratio
	Area	Mean	IntDen Ratio			Area	Mean	IntDen Ratio			Area	Mean	IntDen Ratio
N2			1.09658		N2					N2
CZ26494			5.97694		CZ26494			5.44435		CZ26494			3.73814
CZ26565			5.36299		CZ26565			4.58428		CZ26565			4.1668
CZ26623			2.6315		CZ26623			2.3952		CZ26623			1.17605
	anti-3XFLAG_rep3
	Area	Mean	IntDen
N2
CZ26494	36464	204.73	7465265
CZ26565	40528	180.939	7333101
CZ26623	16200	145.027	2349434
	anti-B-actin_rep3
	Area	Mean	IntDen
N2
CZ26494	11088	180.11	1997055
CZ26565	14256	123.449	1759887
CZ26623	13824	144.511	1997726
	3XFLAG:actin Ratio
	Area	Mean	IntDen Ratio
N2
CZ26494			3.73814
CZ26565			4.1668
CZ26623			1.17605
