# Supplementary material for: Eukaryotic initiation factor EIF-3.G augments mRNA translation efficiency to regulate neuronal activity
Source: eLife. 2021 Jul 29;10:e68336. doi: 10.7554/eLife.68336 (PMC8354637; doi:10.7554/eLife.68336)
Supplement: Figure 4—figure supplement 1—source data 2. — Number of EIF-3.G(WT), EIF-3.G(C130Y), or EIF-3.G(∆RRM) seCLIP reads mapping to each indicated gene. [file elife-68336-fig4-figsupp1-data2.xlsx]

## Sheet: Figure 4- figure supplement 1B
gene_name	EIF-3.G(WT) reads		gene_name	EIF-3.G(C130Y) reads		gene_name	EIF-3.G(∆RRM) reads
21ur-11002	1.66874		21ur-9745	0.79874		43556	4.55616
21ur-550	0.931779		aakg-4	1.21378		21ur-11002	1.7488
2L52.1	0.931779		aap-1	0.79874		21ur-4885	2.16384
aak-1	0.931779		aars-1	2.79874		2L52.1	1.7488
aakg-3	0.931779		aat-3	2.21378		aagr-2	3.62327
abt-6	2.66874		aat-4	2.02113		aagr-4	3.7488
abu-8	3.15417		aat-6	0.79874		aak-2	3.9712
acd-5	0.931779		abu-8	0.79874		aakb-2	2.48577
acr-15	0.931779		acd-2	0.79874		aakg-4	1.7488
acr-19	0.931779		ace-3	1.21378		aakg-5	2.48577
acs-16	3.99067		ace-4	0.79874		aap-1	2.16384
acy-1	0.931779		acl-1	0.79874		aat-2	1.7488
adbp-1	0.931779		acl-3	1.21378		aat-9	2.16384
add-2	0.931779		acr-7	1.79874		abcf-1	3.16384
adt-1	1.93178		acs-12	0.79874		abcf-3	4.41177
alfa-1	0.931779		acs-20	2.91422		abt-1	3.33377
alkb-8	1.34682		acy-1	0.79874		abt-2	3.33377
ani-3	1.93178		adr-2	3.46171		abtm-1	1.7488
anr-16	0.931779		aex-1	0.79874		abts-3	2.7488
anr-8	1.34682		aex-3	1.79874		abu-10	2.48577
ant-1.3	0.931779		aex-6	2.02113		abu-11	2.7488
arl-7	1.34682		agmo-1	1.79874		acbp-5	1.7488
arp-11	1.93178		agr-1	0.79874		acd-1	1.7488
arrd-26	1.93178		agt-1	3.02113		acd-5	1.7488
arrd-6	0.931779		alh-13	2.21378		acdh-11	2.48577
arx-6	2.93178		amx-1	0.79874		acdh-2	3.7488
asfl-1	0.931779		apa-2	3.30124		acdh-9	2.16384
atf-2	1.34682		apc-17	2.53571		acl-1	3.16384
B0035.3	2.34682		aph-1	2.67321		acl-7	1.7488
B0222.11	0.931779		aps-2	1.79874		acl-8	2.16384
B0250.3	0.931779		aptf-4	1.21378		acl-9	3.33377
B0272.4	0.931779		apy-1	2.79874		acs-12	1.7488
B0273.111	1.66874		arc-1	1.21378		acy-1	1.7488
B0294.1	1.34682		arp-11	2.02113		acy-3	2.16384
B0303.7	1.34682		arrd-13	1.21378		adbp-1	2.48577
B0310.3	0.931779		arrd-14	1.79874		add-2	1.7488
B0336.7	0.931779		arrd-6	1.21378		adsl-1	2.7488
B0491.6	2.15417		arrd-7	0.79874		aex-1	1.7488
B0495.5	0.931779		asc-1	1.79874		aex-6	1.7488
B0507.3	0.931779		asp-12	1.53571		agl-1	1.7488
B0524.6	2.34682		asp-8	2.21378		ags-3	1.7488
baf-1	2.15417		atf-2	1.79874		agt-1	2.7488
bath-3	0.931779		atf-6	1.21378		agt-2	3.62327
bath-36	1.34682		atg-16.1	1.21378		air-2	2.16384
bcmo-2	1.34682		athp-1	0.79874		alfa-1	3.62327
best-17	1.93178		attf-5	0.79874		alh-12	3.62327
best-18	0.931779		B0001.5	1.21378		alkb-8	1.7488
bli-1	1.93178		B0001.8	0.79874		aly-1	1.7488
bli-2	1.66874		B0019.2	2.3837		aman-2	2.7488
bpl-1	2.66874		B0024.13	3.46171		amph-1	3.7488
C01B10.3	0.931779		B0205.9	0.79874		amx-3	1.7488
C01B12.8	0.931779		B0244.7	0.79874		anoh-2	1.7488
C01C10.2	0.931779		B0281.3	0.79874		aos-1	3.62327
C01G12.7	0.931779		B0286.1	0.79874		apa-2	2.48577
C02F12.5	0.931779		B0302.5	2.02113		apb-3	3.16384
C03A7.12	1.34682		B0310.2	2.02113		apc-17	1.7488
C03H5.3	0.931779		B0361.2	3.73734		apc-2	3.48577
C04E6.11	0.931779		B0361.6	2.02113		aph-1	2.48577
C04G2.8	2.66874		B0393.5	0.79874		apm-1	4.16384
C05B5.2	0.931779		B0393.6	2.91422		aps-3	2.16384
C05D9.7	0.931779		B0403.5	0.79874		apy-1	2.16384
C06B8.2	0.931779		B0454.9	1.21378		aqp-11	2.9712
C06E1.9	1.34682		B0457.2	0.79874		arf-6	3.9712
C08B6.10	1.66874		B0491.6	3.12067		arid-1	2.9712
C08F8.2	0.931779		B0546.4	3.46171		arl-3	2.7488
C08H9.15	0.931779		B0563.5	2.02113		arp-11	1.7488
C08H9.16	0.931779		B0564.2	0.79874		arr-1	2.7488
C08H9.3	2.15417		B0564.7	3.02113		arrd-10	1.7488
C10B5.1	1.34682		bam-2	1.21378		arrd-17	2.16384
C10G8.t1	1.93178		bath-27	0.79874		arx-3	6.02182
C13C12.2	0.931779		bath-28	0.79874		arx-5	2.16384
C14B1.2	0.931779		bath-29	1.21378		arx-6	1.7488
C14B1.9	2.34682		bath-34	2.53571		asns-2	4.07073
C16C8.8	1.93178		bbs-5	0.79874		asp-11	1.7488
C17D12.7	2.15417		bcs-1	2.02113		atg-11	1.7488
C17D12.t2	0.931779		bed-1	0.79874		atg-13	3.7488
C17E7.12	0.931779		best-13	2.79874		atg-16.1	1.7488
C17H12.4	1.93178		best-17	0.79874		atg-2	3.16384
C24D10.4	1.66874		best-19	0.79874		atg-3	2.7488
C25A1.1	2.80625		best-5	2.02113		atg-4.1	3.86428
C25D7.10	1.66874		best-6	2.3837		atg-7	3.33377
C25E10.4	0.931779		best-8	0.79874		ath-1	4.48577
C25F9.5	1.34682		bicd-1	2.91422		atic-1	4.6874
C25H3.4	0.931779		bir-2	0.79874		attf-3	1.7488
C26B9.1	1.34682		bli-3	3.46171		atx-3	2.9712
C26G2.2	0.931779		blos-4	1.79874		avr-14	3.62327
C26G2.t1	2.66874		bpl-1	0.79874		B0001.2	1.7488
C27C12.4	0.931779		bre-4	1.21378		B0001.5	2.48577
C27C7.5	1.93178		btb-14	1.53571		B0024.10	2.7488
C29E4.9	0.931779		C01B10.48	1.79874		B0024.11	2.9712
C29F9.6	1.66874		C01B10.8	1.79874		B0025.5	2.16384
C30F2.3	0.931779		C01C4.2	2.21378		B0034.1	1.7488
C31E10.6	0.931779		C01G10.10	0.79874		B0035.15	2.7488
C32E12.4	0.931779		C01G10.15	0.79874		B0205.1	1.7488
C32E8.5	2.34682		C01G10.7	1.21378		B0205.9	1.7488
C33F10.4	0.931779		C02F5.12	0.79874		B0238.11	3.7488
C34B2.9	0.931779		C02F5.13	0.79874		B0252.3	1.7488
C34F6.1	1.34682		C03A7.12	0.79874		B0261.1	1.7488
C35E7.5	0.931779		C03B1.13	0.79874		B0272.4	1.7488
C36B7.8	1.66874		C03F11.t1	4.30124		B0285.4	3.33377
C37A5.7	2.66874		C03G6.5	0.79874		B0286.3	1.7488
C39B5.6	1.93178		C03H5.3	2.02113		B0302.5	2.16384
C40A11.3	1.34682		C04A2.15	1.79874		B0303.4	4.86428
C41D11.5	0.931779		C04E6.7	0.79874		B0304.4	1.7488
C41D11.9	0.931779		C04E7.4	3.02113		B0353.1	3.7488
C41H7.4	1.34682		C04F12.7	1.21378		B0361.3	2.16384
C43H6.4	0.931779		C04F12.8	1.53571		B0393.5	1.7488
C44B11.4	0.931779		C04G2.8	0.79874		B0393.6	1.7488
C46F11.5	3.59474		C04G2.9	1.53571		B0393.9	2.48577
C49H3.6	1.93178		C04G6.5	2.21378		B0432.10	1.7488
C50B8.4	0.931779		C05A9.2	2.02113		B0432.14	1.7488
C50D2.6	1.93178		C05C8.1	1.79874		B0432.8	2.7488
C51F7.4	5.66874		C05C8.2	2.67321		B0432.9	2.7488
C54D10.10	1.34682		C05D10.4	2.53571		B0457.2	1.7488
C56A3.5	1.66874		C05D11.13	0.79874		B0464.6	3.48577
C56G2.20	0.931779		C05D11.5	0.79874		B0464.9	2.16384
CD4.3	1.66874		C05D9.12	2.53571		B0491.1	2.16384
cdc-25.3	0.931779		C05E11.3	0.79874		B0491.6	1.7488
cdd-2	1.93178		C05E7.2	1.21378		B0491.7	3.48577
cec-4	1.93178		C06A6.5	2.53571		B0511.7	2.7488
cec-7	1.34682		C06E7.4	1.21378		B0524.6	3.62327
ceh-79	2.34682		C06E8.5	0.79874		B0546.3	3.86428
cex-1	0.931779		C06G1.2	0.79874		B0564.7	2.7488
cfim-2	2.15417		C06G3.6	0.79874		bag-1	2.16384
che-14	1.34682		C06G8.3	2.91422		bar-1	3.48577
chil-13	0.931779		C06H2.2	2.3837		bas-1	1.7488
chs-2	0.931779		C07B5.4	1.21378		bath-34	3.33377
cht-3	3.15417		C07E3.3	0.79874		bath-38	1.7488
chtl-1	0.931779		C08A9.10	1.21378		bath-41	1.7488
cids-1	1.66874		C08A9.8	1.79874		bath-42	2.9712
cki-1	1.66874		C09B7.6	0.79874		bbs-5	1.7488
cku-70	1.34682		C09D4.1	2.53571		bca-1	4.2513
clec-10	1.34682		C09E7.6	0.79874		bcl-1	3.48577
clec-146	1.34682		C09E8.1	1.21378		bec-1	2.16384
clec-149	0.931779		C09F5.1	2.67321		bed-2	2.16384
clec-166	1.93178		C09G1.4	2.02113		best-21	1.7488
clec-218	2.34682		C09H10.10	2.79874		best-22	2.7488
clec-246	1.34682		C09H10.5	1.21378		bir-1	3.16384
clec-70	0.931779		C10B5.3	0.79874		bli-1	2.48577
clec-75	1.93178		C10C5.4	3.02113		blos-1	2.9712
clec-82	0.931779		C10C6.7	2.02113		blos-2	3.86428
cln-3.2	1.34682		C10G11.6	2.53571		brc-1	1.7488
clpf-1	0.931779		C10G8.t1	2.53571		brf-1	2.9712
cnc-2	0.931779		C11H1.9	0.79874		bris-1	4.41177
col-115	0.931779		C13A10.2	1.53571		btb-16	1.7488
col-137	1.34682		C13C4.7	0.79874		btb-19	2.48577
col-153	0.931779		C13G3.1	0.79874		btb-21	2.16384
col-54	3.34682		C14A11.9	2.53571		bub-1	4.07073
coq-4	0.931779		C14A4.9	1.79874		bus-19	2.7488
cpf-1	0.931779		C14B1.12	1.79874		C01A2.2	1.7488
cpi-1	0.931779		C14C10.2	2.02113		C01B10.3	4.07073
cpna-4	0.931779		C14C11.2	0.79874		C01B10.6	3.48577
cpt-6	2.34682		C14F11.6	0.79874		C01B10.8	3.33377
crn-2	1.93178		C15A11.4	0.79874		C01B10.9	2.7488
crn-5	1.34682		C15B12.1	0.79874		C01F6.14	1.7488
cuti-1	0.931779		C15C6.t1	3.30124		C01G10.8	4.48577
cutl-15	2.66874		C15C7.4	0.79874		C01G12.12	1.7488
cutl-20	1.34682		C15F1.2	0.79874		C01G5.6	3.16384
cwn-2	1.93178		C15H11.12	3.21378		C01G6.3	3.7488
cyn-12	0.931779		C16A11.3	2.67321		C02B10.3	4.07073
cyn-2	1.93178		C16A11.4	3.21378		C02B10.5	3.62327
cyp-33A1	0.931779		C16A3.1	2.02113		C02B8.6	1.7488
D1007.10	0.931779		C16A3.2	1.79874		C02F12.5	1.7488
D1007.15	2.34682		C16A3.6	2.53571		C02F5.12	1.7488
D1053.4	1.34682		C16C10.13	1.53571		C02F5.3	3.16384
D2005.7	0.931779		C16C8.4	0.79874		C02G6.1	1.7488
D2024.15	2.34682		C16C8.5	2.02113		C03A3.2	1.7488
D2030.3	0.931779		C16E9.1	1.53571		C03A7.12	2.7488
D2062.6	0.931779		C17C3.1	3.73734		C03A7.13	3.48577
daf-28	1.34682		C17E4.20	2.02113		C03F11.t1	4.9712
dct-15	0.931779		C17E4.4	1.21378		C03H5.3	1.7488
ddo-1	0.931779		C17H12.8	3.3837		C04F5.9	3.86428
ddr-2	0.931779		C18A3.1	0.79874		C04G2.3	3.48577
decr-1.1	1.66874		C18A3.10	2.3837		C04G2.9	4.41177
dgtr-1	2.34682		C18E3.3	0.79874		C04G6.4	2.7488
dhs-11	0.931779		C18E3.5	1.79874		C05D12.3	2.16384
dhs-12	2.34682		C18E9.5	2.02113		C05D2.10	2.16384
dhs-25	3.73913		C18E9.9	2.91422		C05D2.11	3.9712
dnc-3	0.931779		C18H2.2	1.79874		C05D9.3	2.48577
dnj-15	0.931779		C18H9.5	0.79874		C05E7.2	2.16384
dnj-17	1.66874		C23H3.3	0.79874		C06A1.12	2.48577
dnj-8	2.93178		C23H4.7	0.79874		C06A12.3	3.86428
dop-1	2.66874		C24H10.2	0.79874		C06A5.1	2.9712
dop-2	2.66874		C25A11.2	2.02113		C06A5.8	1.7488
dos-2	0.931779		C25F6.1	0.79874		C06A8.6	1.7488
dsh-2	0.931779		C25F6.7	1.21378		C06B3.6	4.16384
duo-1	0.931779		C25F9.11	0.79874		C06G1.1	3.62327
dyrb-1	1.66874		C25F9.14	0.79874		C06G1.5	1.7488
E01G6.3	2.15417		C25H3.11	3.60609		C06G3.8	2.16384
E02A10.4	1.66874		C26C6.9	2.02113		C06G4.1	1.7488
E02H1.5	1.34682		C26D10.6	2.53571		C06G8.3	2.7488
efl-2	0.931779		C26E6.12	0.79874		C07D10.5	2.48577
efn-4	1.34682		C27A7.1	1.79874		C07H4.1	1.7488
EGAP4.1	0.931779		C27A7.6	2.3837		C07H6.10	4.16384
egl-38	0.931779		C27B7.2	2.3837		C07H6.2	3.62327
ekl-5	0.931779		C27B7.9	1.21378		C07H6.4	3.48577
ekl-6	1.66874		C27C12.4	0.79874		C08B11.8	1.7488
elf-1	1.34682		C27F2.7	0.79874		C08B6.8	3.62327
elks-1	3.25371		C27H5.2	0.79874		C08F11.13	4.07073
elpc-4	0.931779		C28A5.1	3.60609		C08F8.2	3.48577
emb-1	1.66874		C28C12.11	0.79874		C08F8.3	3.33377
eor-2	1.93178		C28C12.12	3.67321		C08G5.7	1.7488
eri-6	1.34682		C28G1.5	2.02113		C08H9.16	1.7488
eri-7	0.931779		C28H8.14	2.21378		C08H9.3	3.33377
ets-6	0.931779		C29F7.t2	5.16797		C09D4.2	3.48577
exos-7	2.34682		C29F9.12	0.79874		C09E7.8	3.62327
E_BE45912.2	1.34682		C30F12.2	3.12067		C09E9.1	2.16384
F02A9.1	2.51674		C30H6.12	1.21378		C09F9.2	2.7488
F07C4.12	1.93178		C31C9.7	3.53571		C09H10.5	1.7488
F07H5.10	2.51674		C33A12.4	1.21378		C10C5.4	2.16384
F07H5.13	0.931779		C33D9.5	1.21378		C10G11.6	3.16384
F08A8.8	2.15417		C33D9.6	0.79874		C10G11.9	2.9712
F08B4.3	1.66874		C34B2.5	2.3837		C11E4.7	2.16384
F08F1.t2	1.93178		C34B2.9	0.79874		C11H1.8	2.16384
F08F3.10	2.93178		C34C6.4	0.79874		C12D12.1	3.33377
F08F8.4	1.34682		C34F11.8	0.79874		C13C4.6	1.7488
F08G12.1	0.931779		C34F6.7	2.3837		C13F10.6	1.7488
F09E10.7	2.15417		C34F6.9	2.3837		C14B1.8	3.33377
F10G2.1	0.931779		C34H4.2	1.53571		C14C10.1	1.7488
F11C3.1	0.931779		C34H4.5	1.21378		C14C10.2	3.48577
F11C7.2	1.66874		C35A5.11	1.21378		C14C10.4	3.86428
F11D5.1	0.931779		C35C5.3	2.53571		C14C11.2	1.7488
F13B12.4	1.93178		C35D10.13	2.67321		C14C6.2	1.7488
F13E9.11	0.931779		C35D10.6	3.67321		C14F11.6	1.7488
F13H6.12	0.931779		C35D10.7	1.21378		C15B12.1	1.7488
F14B6.2	0.931779		C35E7.4	1.21378		C15C6.4	2.48577
F14B8.4	0.931779		C35E7.6	1.79874		C15H9.11	1.7488
F14D2.19	0.931779		C35E7.8	2.02113		C15H9.5	1.7488
F15E6.6	0.931779		C36A4.14	2.3837		C16A11.4	3.62327
F16F9.1	0.931779		C36A4.5	3.30124		C16A3.2	2.16384
F16H6.10	2.93178		C36C5.5	2.21378		C16A3.6	3.33377
F18A11.3	1.93178		C36C9.10	2.53571		C16B8.3	3.86428
F18C12.3	0.931779		C36E6.2	1.79874		C16C8.16	2.7488
F18E2.1	0.931779		C37A5.11	1.21378		C16C8.4	1.7488
F19B10.1	1.93178		C37C3.1	1.79874		C17E7.12	2.48577
F21C10.3	1.93178		C37H5.13	2.67321		C17H12.11	2.48577
F21F3.7	0.931779		C38D4.9	0.79874		C17H12.4	2.7488
F22B5.4	2.15417		C39B5.6	0.79874		C18A3.2	2.16384
F22F7.7	2.66874		C39D10.8	1.53571		C18B12.6	2.7488
F22G12.t2	0.931779		C39F7.5	0.79874		C18B2.4	2.9712
F23F12.12	2.15417		C40A11.3	1.79874		C18C4.5	3.48577
F25E2.2	2.51674		C41H7.4	0.79874		C18C4.7	2.48577
F26A1.13	0.931779		C42C1.11	2.67321		C18E3.9	4.48577
F26D11.1	2.51674		C42C1.8	2.53571		C18E9.9	1.7488
F26E4.2	0.931779		C42D4.3	1.79874		C18F10.7	1.7488
F26F4.6	0.931779		C42D8.1	1.79874		C23G10.11	2.16384
F27C1.1	1.34682		C43C3.4	0.79874		C23G10.2	4.55616
F27E5.1	1.93178		C43G2.t2	2.79874		C23G10.7	4.86428
F29B9.12	0.931779		C43H6.4	0.79874		C23G10.8	2.48577
F29B9.5	2.34682		C43H8.1	2.02113		C23H3.5	2.7488
F31B12.t1	3.73913		C44B7.12	3.85763		C23H3.9	2.7488
F31E8.6	1.34682		C44B7.2	2.79874		C24D10.4	1.7488
F31F6.15	1.34682		C44B7.6	0.79874		C24D10.6	2.48577
F32A11.3	0.931779		C44B7.7	0.79874		C24F3.2	2.7488
F32D1.11	0.931779		C44F1.1	0.79874		C24G6.2	2.9712
F32D8.10	0.931779		C45B2.6	1.21378		C25D7.10	3.86428
F32D8.5	0.931779		C45E1.4	1.79874		C25F9.11	2.16384
F34D10.4	0.931779		C46C11.3	0.79874		C25F9.14	2.7488
F35D11.3	0.931779		C47E8.10	0.79874		C25H3.10	1.7488
F35E12.11	1.93178		C47E8.3	0.79874		C25H3.17	2.9712
F36F2.2	1.34682		C48B4.1	2.3837		C25H3.8	4.62327
F36H9.7	1.66874		C48B4.7	1.53571		C26B2.7	2.7488
F37C4.4	2.15417		C48C5.t2	2.67321		C26C6.9	1.7488
F38B7.3	1.34682		C48E7.2	1.21378		C26F1.3	1.7488
F38E9.1	2.34682		C49C8.2	0.79874		C26G2.2	3.33377
F38H4.16	0.931779		C49F8.3	2.67321		C27A12.6	3.7488
F39H12.3	1.34682		C50A2.3	0.79874		C27A12.7	3.62327
F40B5.2	0.931779		C50B6.7	2.21378		C27A12.9	2.16384
F40H6.2	0.931779		C50B8.6	1.21378		C27A7.6	2.7488
F41C3.8	1.93178		C50E3.13	1.79874		C27C12.4	1.7488
F41E7.20	2.15417		C50F2.4	2.3837		C27D8.4	1.7488
F42A6.6	2.15417		C51E3.6	0.79874		C27D9.1	3.86428
F42A8.1	2.34682		C53A5.16	1.79874		C27F2.7	2.7488
F42H10.3	1.34682		C53A5.17	1.53571		C27F2.9	1.7488
F43C11.7	0.931779		C53D6.16	1.79874		C28F5.1	1.7488
F43C9.t1	2.15417		C53D6.6	0.79874		C28H8.14	2.9712
F43H9.4	1.93178		C53D6.7	0.79874		C29F5.1	3.33377
F44B9.5	1.93178		C54D10.3	3.30124		C29F9.3	2.48577
F44E2.8	1.93178		C54E4.4	2.02113		C29G2.6	2.9712
F44G4.6	0.931779		C54G4.9	1.79874		C30F2.3	1.7488
F46A8.1	0.931779		C55B7.10	1.79874		C30G7.2	2.16384
F46G10.4	0.931779		C55B7.11	2.02113		C30G7.3	1.7488
F46H5.4	0.931779		C56G7.3	0.79874		C30H6.5	2.16384
F47B8.3	0.931779		cah-5	2.67321		C30H6.8	2.16384
F48B9.1	0.931779		cal-1	1.21378		C31H5.4	2.16384
F49C12.14	0.931779		cars-2	1.21378		C31H5.6	2.16384
F49C5.4	1.66874		catp-5	0.79874		C32D5.1	1.7488
F52A8.3	1.34682		CC8.2	4.07176		C32D5.10	3.16384
F52B10.21	1.34682		ccch-3	1.79874		C32D5.11	4.33377
F52D10.6	0.931779		ccdc-55	1.79874		C32D5.3	3.33377
F52H2.7	1.93178		ccz-1	2.3837		C32F10.4	1.7488
F53A9.2	3.80625		CD4.1	1.21378		C33A11.2	1.7488
F53A9.6	1.34682		cdf-1	1.21378		C33C12.10	2.9712
F53B1.8	1.93178		cdh-1	0.79874		C33C12.7	1.7488
F53E10.1	2.51674		cdh-8	0.79874		C33C12.9	1.7488
F53F4.12	1.34682		cebp-1	0.79874		C33D9.3	1.7488
F53H4.6	0.931779		ceeh-1	0.79874		C33F10.1	2.16384
F53H8.3	0.931779		ceeh-2	0.79874		C33F10.11	1.7488
F54C8.6	1.93178		ceh-22	3.3837		C34B2.11	1.7488
F54D11.4	1.34682		ceh-39	2.53571		C34C12.2	1.7488
F54E7.9	1.34682		ceh-79	0.79874		C34C12.7	2.16384
F55A11.4	1.34682		cex-2	2.67321		C34D4.3	1.7488
F55G1.9	0.931779		cgt-1	0.79874		C34F6.10	1.7488
F56A11.6	2.51674		che-14	2.79874		C34G6.3	1.7488
F56A8.9	2.15417		chil-10	0.79874		C35C5.3	3.16384
F56B3.11	2.34682		chil-13	0.79874		C35D10.10	3.9712
F56C11.5	0.931779		chil-14	0.79874		C35D10.5	2.16384
F56D6.9	1.34682		chup-1	1.79874		C35E7.10	1.7488
F57A10.4	0.931779		cka-1	4.3837		C36B1.6	1.7488
F57B1.9	0.931779		cka-2	0.79874		C39B5.6	2.16384
F57B10.4	0.931779		ckb-4	0.79874		C39F7.5	1.7488
F58D5.t1	0.931779		clc-2	1.79874		C40H1.2	1.7488
F58F9.1	0.931779		clec-10	2.3837		C41D11.5	3.9712
F58G6.7	0.931779		clec-190	2.21378		C41H7.6	2.16384
F58H1.3	0.931779		clec-218	2.21378		C42C1.12	1.7488
F59A2.5	2.51674		clec-265	2.21378		C42C1.13	1.7488
F59A3.12	0.931779		clec-41	2.67321		C42D4.3	4.07073
F59B10.3	0.931779		clec-5	2.91422		C42D8.1	1.7488
F59E11.5	0.931779		clec-56	0.79874		C43E11.12	2.7488
F59E12.1	2.51674		clec-62	1.21378		C43E11.9	2.7488
F59F4.3	2.51674		clec-67	1.21378		C43H6.3	1.7488
F59H5.1	0.931779		clec-78	1.79874		C44C1.5	2.7488
faah-1	1.34682		clec-80	0.79874		C44C1.6	1.7488
fahd-1	1.93178		clp-2	0.79874		C44C10.9	3.62327
fbxa-124	0.931779		clpf-1	0.79874		C45B2.2	2.9712
fbxa-14	2.15417		cls-3	3.02113		C45B2.6	1.7488
fbxa-59	1.66874		cnc-2	1.21378		C45G9.2	1.7488
fipr-10	1.66874		cnp-3	2.02113		C46F11.6	1.7488
fipr-3	1.34682		cof-2	0.79874		C47B2.9	2.48577
flp-26	0.931779		cogc-3	2.91422		C47E8.4	1.7488
flp-34	0.931779		col-115	2.02113		C47G2.3	1.7488
frh-1	0.931779		col-118	1.53571		C48B4.11	2.9712
frpr-18	0.931779		col-130	1.53571		C48C5.t2	4.41177
fshr-1	1.66874		col-153	0.79874		C48D1.1	1.7488
fut-2	1.66874		col-157	1.21378		C48E7.2	2.48577
fzo-1	1.93178		col-165	2.02113		C49A9.10	2.9712
gar-1	3.51674		col-170	1.21378		C49A9.6	1.7488
gfi-3	0.931779		col-34	0.79874		C49C8.5	1.7488
glct-6	0.931779		col-36	0.79874		C49F8.3	2.16384
glr-6	0.931779		col-40	2.21378		C49H3.3	4.33377
glrx-22	0.931779		col-48	3.60609		C49H3.9	4.07073
gly-13	2.51674		col-53	0.79874		C50B6.7	1.7488
gmeb-1	2.66874		col-58	2.67321		C50C3.1	2.48577
gopc-1	0.931779		coq-2	1.79874		C50D2.10	2.48577
gpd-4	1.93178		cox-11	1.21378		C50D2.7	1.7488
grk-2	0.931779		cox-17	3.02113		C50D2.8	2.9712
H14E04.2	2.15417		cpf-2	2.53571		C50E10.1	2.16384
H40L08.1	1.34682		cpg-4	4.21378		C50F4.12	3.48577
ham-3	1.93178		cpna-5	3.3837		C50F4.16	3.33377
hhat-2	0.931779		cps-6	0.79874		C50H2.13	1.7488
him-5	0.931779		cpsf-3	3.30124		C51E3.9	2.16384
his-2	1.93178		crn-6	1.79874		C52B9.4	2.7488
his-38	0.931779		ctg-1	3.46171		C52E12.t2	2.48577
his-5	1.93178		cutl-15	0.79874		C52G5.2	2.16384
his-73	1.34682		cutl-20	0.79874		C53A5.13	1.7488
his-74	1.66874		cutl-23	0.79874		C53A5.16	4.07073
hosl-1	0.931779		cutl-24	2.02113		C53A5.2	1.7488
hot-9	2.15417		cutl-28	1.79874		C53B4.3	1.7488
hpo-17	0.931779		cyk-1	3.12067		C53B7.3	3.86428
hrpf-2	1.93178		cyn-10	1.53571		C53D5.1	3.48577
hst-1	1.93178		cyn-2	0.79874		C53D6.12	2.48577
hst-6	0.931779		cyn-8	0.79874		C53D6.16	2.16384
htp-2	2.34682		cyn-9	2.3837		C53D6.4	1.7488
idh-2	2.93178		cyp-13A2	0.79874		C53D6.7	2.16384
ife-2	1.66874		cyp-31A5	3.60609		C54D10.3	2.9712
ikb-1	1.66874		cyp-33A1	1.21378		C54D2.1	1.7488
ins-33	1.66874		cyp-33C7	0.79874		C54E4.5	1.7488
ins-4	0.931779		cyp-34A9	0.79874		C55A6.10	1.7488
inx-11	6.2048		cyp-35A2	2.02113		C55B6.1	1.7488
jmjc-1	1.34682		cyp-44A1	3.12067		C55B7.11	3.9712
K01A12.3	1.34682		D1054.1	0.79874		C56A3.4	3.48577
K01C8.7	1.34682		D1081.9	2.21378		C56E6.9	2.9712
K02E11.4	0.931779		D2005.7	1.53571		C56G7.2	1.7488
K02E7.11	0.931779		D2007.1	2.21378		cacn-1	2.9712
K02E7.6	2.66874		D2023.4	2.53571		cah-5	2.7488
K03H1.7	0.931779		D2024.15	1.21378		cam-1	3.7488
K04C1.2	0.931779		D2092.8	0.79874		camt-1	3.33377
K04G2.7	0.931779		D2096.6	0.79874		capg-2	3.16384
K04G7.1	0.931779		daf-14	0.79874		cars-2	3.62327
K05B2.2	2.15417		daf-19	2.91422		cas-2	2.48577
K05F1.10	1.66874		daf-25	2.02113		catp-1	3.16384
K07A1.1	0.931779		daf-3	1.79874		cbl-1	1.7488
K07C5.2	0.931779		daf-8	1.21378		cca-1	1.7488
K07F5.12	1.34682		ddl-2	1.79874		ccch-3	2.16384
K08B12.3	0.931779		ddl-3	2.21378		ccnk-1	3.62327
K08B5.2	0.931779		dex-1	1.21378		CD4.10	2.48577
K08D8.7	1.66874		dgat-2	0.79874		cdc-14	5.52139
K08D9.9	0.931779		dgk-5	3.30124		cdc-25.1	4.91873
K09E9.1	0.931779		dgtr-1	2.79874		cdc-26	3.33377
K09F6.5	0.931779		dhs-18	1.53571		cdc-7	3.16384
K09H11.6	0.931779		dhs-2	0.79874		cdd-1	2.16384
K10B2.2	0.931779		dhs-20	2.02113		cdgs-1	3.86428
K10D6.4	1.34682		dhs-23	0.79874		cdh-4	3.33377
K11H12.4	0.931779		dhs-27	0.79874		cdh-5	2.7488
K11H12.8	3.25371		dhs-29	2.21378		cdk-2	3.33377
kal-1	1.93178		dic-1	3.12067		cdka-1	2.9712
kbp-4	1.93178		dis-3	4.67321		cdt-1	2.16384
lam-3	0.931779		dli-1	3.12067		cdt-2	3.86428
lbp-4	0.931779		dmsr-8	1.79874		cebp-2	3.7488
let-23	0.931779		dnj-18	1.21378		cec-1	2.48577
let-7	2.15417		dnj-2	3.12067		cec-3	4.07073
lgc-27	0.931779		dnj-21	0.79874		cec-4	2.16384
lgc-31	2.34682		dnj-24	2.91422		cec-7	1.7488
lgx-1	2.51674		dnj-26	0.79874		cec-8	1.7488
lin-37	0.931779		dnj-3	0.79874		ced-10	5.02182
lin-4	1.34682		dod-17	1.79874		ced-2	4.2513
lin-56	1.34682		dod-24	1.21378		ced-3	4.9712
lin-9	0.931779		dox-1	1.79874		ced-5	3.7488
lips-16	0.931779		dpf-1	0.79874		ceh-100	2.9712
lir-2	0.931779		dpf-2	2.79874		ceh-13	2.48577
lron-14	0.931779		dph-3	2.3837		ceh-21	2.16384
lsd-1	1.93178		dpy-19	0.79874		ceh-34	1.7488
lsm-6	2.51674		dpy-22	3.12067		ceh-44	1.7488
M01E11.3	0.931779		dpy-6	0.79874		ceh-58	1.7488
M02B1.4	0.931779		dpy-7	2.21378		ceh-88	2.9712
M02E1.2	2.34682		drn-1	2.79874		ceh-91	2.16384
M02E1.3	1.66874		drr-1	0.79874		cel-1	4.2513
M03A8.3	1.34682		dve-1	4.21378		cept-1	3.48577
M03B6.3	0.931779		E01G6.1	1.21378		cex-1	2.7488
M116.5	0.931779		E01G6.2	0.79874		cex-2	4.16384
madf-2	0.931779		E02A10.3	1.79874		cfim-2	2.48577
math-38	0.931779		E02A10.4	1.21378		cgr-1	1.7488
mbk-1	2.66874		E02H4.7	0.79874		chaf-1	4.33377
mboa-7	0.931779		E02H9.4	0.79874		chaf-2	1.7488
mct-1	1.93178		eat-18	0.79874		chd-1	2.16384
mes-2	0.931779		ech-3	0.79874		chd-3	2.9712
mesp-1	3.80625		EEED8.14	2.3837		chil-24	1.7488
mig-13	1.34682		EEED8.18	0.79874		chk-1	2.16384
mig-14	1.93178		efhd-1	1.21378		chn-1	4.41177
mir-2214	5.66874		efl-3	0.79874		chp-1	2.48577
mir-228	1.93178		efn-4	1.21378		cht-3	1.7488
mir-4812	1.34682		eftu-2	4.3837		cic-1	3.86428
mir-72	1.93178		egl-13	2.21378		cids-2	4.48577
mlc-7	0.931779		egl-15	0.79874		cil-1	2.16384
mlh-1	2.15417		egl-23	0.79874		cit-1.1	1.7488
mmab-1	0.931779		egl-26	0.79874		cki-1	3.16384
mnp-1	0.931779		egl-43	0.79874		ckr-2	3.62327
moa-2	2.15417		ekl-5	2.53571		cle-1	2.7488
moc-3	0.931779		elks-1	2.79874		clec-10	1.7488
mocs-1	0.931779		elp-1	0.79874		clec-150	1.7488
mppa-1	2.51674		elt-4	1.79874		clec-180	2.9712
mrpl-1	0.931779		emb-1	1.53571		clec-222	1.7488
mrpl-22	1.34682		eme-1	2.3837		clec-230	1.7488
mrpl-49	2.34682		eng-1	0.79874		clec-25	1.7488
mrpl-54	0.931779		enu-3.5	0.79874		clec-48	3.7488
mrps-11	2.51674		eor-2	0.79874		clec-65	2.16384
mrps-17	1.66874		eri-5	0.79874		clec-84	4.2513
mrps-2	1.34682		eri-7	2.3837		clec-91	2.48577
mrps-21	0.931779		ess-2	2.91422		clh-5	4.41177
mrps-31	0.931779		ets-6	2.79874		clk-1	1.7488
mrps-7	0.931779		exc-9	0.79874		clp-4	1.7488
msd-4	2.51674		exo-1	2.21378		clr-1	5.44924
msp-142	0.931779		exos-8	1.53571		cls-1	2.16384
msp-152	1.34682		exp-2	1.79874		cmk-1	2.7488
msp-38	1.66874		F01D5.3	1.79874		cnep-1	4.2513
msp-45	1.34682		F01G10.10	1.21378		cnk-1	1.7488
msp-50	0.931779		F01G10.9	0.79874		cnp-2	2.9712
msp-64	1.93178		F01G4.4	0.79874		cnp-3	1.7488
msp-77	0.931779		F02E8.4	3.12067		cnt-1	3.33377
mtcu-2	3.15417		F02E9.1	3.53571		coel-1	1.7488
mut-2	0.931779		F02H6.2	0.79874		cogc-2	3.33377
mxl-2	2.80625		F02H6.3	0.79874		cogc-6	3.16384
nac-2	1.34682		F07C3.2	1.79874		cogc-8	2.16384
nas-11	0.931779		F07C3.9	1.79874		coh-1	2.16384
nfya-2	0.931779		F07F6.1	0.79874		col-115	2.48577
nhr-202	0.931779		F07G6.10	0.79874		col-118	2.7488
nhr-27	1.93178		F07H5.13	1.53571		col-130	4.91873
nhr-61	2.80625		F08B4.8	0.79874		col-150	1.7488
nhr-80	2.15417		F08G2.7	2.21378		col-169	2.16384
nhx-9	0.931779		F08G5.t3	1.21378		col-176	2.16384
nlp-37	0.931779		F09E5.11	1.53571		col-3	2.7488
nlp-41	2.51674		F09E5.16	0.79874		col-34	2.16384
nlp-47	0.931779		F09F7.5	1.21378		col-41	2.48577
nlp-7	2.15417		F10C2.5	0.79874		col-63	5.07073
nmgp-1	0.931779		F10D7.1	0.79874		col-7	2.9712
npr-29	0.931779		F10D7.5	3.91422		col-90	3.86428
npr-5	3.51674		F10E7.9	1.21378		copd-1	2.16384
nspc-18	1.34682		F10E9.11	1.21378		cope-1	3.62327
ntc-1	0.931779		F10E9.5	3.12067		copz-1	3.48577
oac-57	1.66874		F10G2.1	1.79874		coq-5	1.7488
obr-3	1.93178		F11A10.6	0.79874		cor-1	3.86428
ooc-3	0.931779		F12E12.6	0.79874		cox-10	1.7488
orc-2	1.34682		F13B6.3	0.79874		cox-15	1.7488
orc-3	0.931779		F13C5.5	3.21378		cox-17	2.7488
osm-5	1.34682		F13D11.4	0.79874		cpg-4	3.48577
parn-2	1.93178		F13D12.10	0.79874		cpn-4	4.07073
pept-2	0.931779		F13D12.5	2.53571		cpna-1	2.7488
pes-8	0.931779		F13D12.8	0.79874		cpsf-2	3.33377
pgp-14	0.931779		F13D2.1	2.53571		cpt-5	3.16384
pgp-3	1.34682		F13E6.5	2.67321		crm-1	3.7488
pgp-9	1.34682		F13E9.11	2.91422		crml-1	4.2513
pik-1	0.931779		F13G3.10	2.02113		crn-1	3.16384
pink-1	0.931779		F13H8.2	3.12067		crn-3	1.7488
pinn-4	0.931779		F14B8.6	2.21378		crn-5	2.16384
pmp-4	1.34682		F14D2.19	1.53571		csn-3	2.16384
pnk-4	0.931779		F14H3.3	0.79874		csn-4	3.33377
prde-1	1.93178		F14H3.4	2.02113		csn-5	2.16384
prmt-7	0.931779		F15A4.6	2.91422		csn-6	3.33377
prom-1	1.34682		F15E6.4	2.53571		ctn-1	4.16384
prx-1	1.93178		F16A11.2	0.79874		ctr-9	1.7488
psf-2	1.93178		F16B12.4	1.21378		cua-1	3.48577
pst-1	2.51674		F16B12.6	1.79874		cup-2	4.48577
ptp-4	0.931779		F16F9.4	0.79874		cup-5	1.7488
puf-10	1.34682		F17A9.4	0.79874		cutl-15	1.7488
pus-1	1.93178		F17B5.1	1.21378		cux-7	3.86428
R01B10.3	0.931779		F17C11.12	1.79874		cyh-1	4.07073
R02F2.4	0.931779		F17C11.2	2.21378		cyn-1	3.62327
R03G5.6	0.931779		F17C11.6	1.79874		cyn-11	3.7488
R03H10.2	0.931779		F17C8.9	0.79874		cyn-13	3.16384
R05C11.4	3.15417		F17E5.2	0.79874		cyn-6	2.7488
R05D11.5	0.931779		F17H10.2	2.02113		cyp-14A5	1.7488
R05D3.3	0.931779		F18A11.5	1.21378		cyp-31A1	2.16384
R05D7.3	0.931779		F18A11.6	1.53571		cyp-31A5	3.33377
R05D7.7	0.931779		F18E2.1	0.79874		cyp-35A2	3.16384
R05F9.9	0.931779		F18F11.1	1.79874		cyp-44A1	1.7488
R05H11.2	1.34682		F19B10.2	0.79874		cytb-5.1	1.7488
R07A4.2	0.931779		F19C6.4	0.79874		czw-1	4.16384
R07B7.2	1.93178		F19C7.8	1.53571		D1005.1	1.7488
R07B7.4	0.931779		F19G12.10	0.79874		D1005.4	1.7488
R07D5.2	0.931779		F19G12.9	0.79874		D1007.5	2.7488
R07E3.4	0.931779		F20C5.4	1.79874		D1043.1	1.7488
R07G3.7	2.93178		F20D1.9	1.21378		D1044.6	3.62327
R08B4.5	1.93178		F20G2.3	1.79874		D1054.1	2.16384
R08E5.3	1.34682		F20G4.2	0.79874		D1054.3	3.48577
R09B5.11	0.931779		F21A3.11	0.79874		D1054.9	1.7488
R10E12.2	0.931779		F21C3.7	5.12067		D1069.3	1.7488
R11G11.6	0.931779		F21F3.7	1.79874		D1081.9	1.7488
R144.12	1.34682		F21G4.1	0.79874		D1086.12	3.16384
R144.5	0.931779		F22B5.4	0.79874		D1086.17	1.7488
R155.3	1.34682		F22B8.7	0.79874		D2005.4	3.33377
R17.3	0.931779		F22D3.6	0.79874		D2007.1	2.16384
R74.7	0.931779		F22D6.8	0.79874		D2023.6	2.7488
rde-11	0.931779		F22E5.17	1.79874		D2062.5	2.7488
rga-2	0.931779		F23A7.8	2.67321		D2085.3	1.7488
rgs-2	2.66874		F23D12.7	1.21378		D2085.4	1.7488
rgs-6	3.51674		F23F12.3	1.79874		D2092.8	1.7488
rib-2	0.931779		F23H11.2	2.67321		D2096.10	2.9712
ric-3	0.931779		F25E2.3	0.79874		D2096.16	2.48577
rnh-1.2	0.931779		F25E5.1	0.79874		D2096.6	3.62327
rnp-5	0.931779		F25E5.5	2.3837		daf-1	3.33377
rom-1	0.931779		F25H10.7	1.21378		daf-12	4.2513
rpb-10	1.66874		F25H2.12	2.3837		daf-25	2.16384
rpb-12	2.51674		F25H2.4	3.60609		daf-4	3.33377
rpl-24.1	7.05418		F25H9.7	1.53571		dagl-2	4.07073
rpoa-12	2.15417		F26A1.14	0.79874		dao-3	2.16384
rps-29	6.34682		F26A3.7	1.79874		dap-3	3.62327
san-1	1.93178		F26F12.8	1.21378		dapk-1	4.91873
sand-1	1.93178		F27C1.6	4.25817		dars-2	1.7488
scl-22	1.93178		F27D4.8	0.79874		dcaf-1	1.7488
sec-3	0.931779		F27D9.7	0.79874		dcap-1	3.86428
sel-12	1.93178		F28B1.3	0.79874		dcap-2	4.07073
ser-7	0.931779		F28C6.4	1.79874		dcar-1	4.07073
set-23	0.931779		F28E10.1	1.21378		dct-6	4.7488
sex-1	2.51674		F28F5.6	2.67321		ddb-1	4.2513
sid-5	1.93178		F28H1.1	1.79874		ddp-1	3.33377
sma-3	1.93178		F28H6.4	0.79874		ddx-23	1.7488
snf-11	2.15417		F29A7.6	1.21378		deps-1	4.07073
spat-1	0.931779		F29B9.1	2.3837		dgk-1	2.48577
sptf-2	0.931779		F29B9.12	0.79874		dgk-5	2.16384
sqv-8	1.66874		F29G6.1	0.79874		DH11.2	3.16384
srd-66	0.931779		F29G9.7	0.79874		dhhc-14	2.7488
srj-14	1.34682		F30A10.13	1.79874		dhhc-2	2.7488
srt-56	0.931779		F30A10.14	2.3837		dhhc-3	1.7488
sru-20	2.93178		F30A10.2	0.79874		dhhc-6	1.7488
srx-12	3.34682		F30F8.5	0.79874		dhhc-7	5.11804
sto-2	0.931779		F31C3.6	2.67321		dhod-1	3.62327
sto-5	0.931779		F31E8.1	0.79874		dhp-1	4.07073
sulp-4	0.931779		F31E8.4	2.21378		dhs-22	3.62327
sup-18	0.931779		F31F4.1	0.79874		dhs-25	3.7488
sup-36	1.34682		F32A11.3	0.79874		dhs-28	3.16384
swd-2.2	1.66874		F32B4.5	1.79874		dhs-5	1.7488
syp-2	1.34682		F32B5.2	0.79874		die-1	3.33377
syp-3	0.931779		F32D8.5	3.12067		dli-1	2.7488
T01C3.2	0.931779		F33A8.6	0.79874		dlk-1	3.33377
T02G5.14	0.931779		F33A8.7	1.79874		dma-1	1.7488
T02G6.1	0.931779		F33E11.2	3.21378		dna-2	3.33377
T03D8.6	1.34682		F33G12.2	2.53571		dnc-1	2.9712
T03G11.10	1.93178		F33G12.3	1.21378		dnc-5	1.7488
T03G11.6	0.931779		F34D10.8	1.79874		dnc-6	2.7488
T04A8.8	2.15417		F35A5.1	3.12067		dnj-1	4.55616
T04D3.5	0.931779		F35B12.10	0.79874		dnj-14	1.7488
T06A10.3	1.66874		F35B3.7	0.79874		dnj-18	2.9712
T07C4.12	1.34682		F35D11.3	2.02113		dnj-21	2.16384
T07F12.1	0.931779		F35D11.4	1.21378		dnj-24	3.16384
T08B2.4	1.34682		F35D2.3	1.79874		dnj-4	1.7488
T08G2.2	0.931779		F35H10.6	1.53571		dnj-8	3.48577
T09A5.5	3.04726		F36A2.2	1.79874		dnpp-1	2.9712
T11G6.3	0.931779		F36D1.7	1.79874		dod-18	1.7488
T12B5.15	1.66874		F36F2.2	0.79874		dod-23	3.7488
T12D8.10	3.15417		F36G3.1	1.79874		dohh-1	3.33377
T14G10.8	1.34682		F37B4.10	1.21378		dop-1	1.7488
T16A9.5	0.931779		F37C4.4	0.79874		dox-1	2.48577
T16G1.7	0.931779		F38B6.4	1.79874		dpf-2	2.7488
T16G12.6	0.931779		F38B7.2	0.79874		dpf-5	5.02182
T17A3.2	0.931779		F38H4.10	2.67321		dph-1	2.16384
T18D3.6	0.931779		F39G3.5	2.21378		dph-2	1.7488
T19D7.7	1.93178		F40A3.1	2.3837		dph-3	2.16384
T20G5.9	0.931779		F40A3.7	2.53571		dpy-17	4.41177
T21D12.14	1.34682		F40B5.2	1.21378		dpy-18	2.9712
T21G5.6	1.93178		F40F8.1	2.53571		dpy-2	2.9712
T22D1.5	3.66874		F40F8.4	1.21378		dpy-22	1.7488
T22F3.7	1.93178		F41B4.2	0.79874		dpy-28	4.55616
T23B3.5	0.931779		F41C3.11	0.79874		dpy-3	1.7488
T23G11.1	1.34682		F41C6.7	0.79874		dpy-31	2.7488
T24B8.5	1.66874		F41D9.2	3.02113		dpy-8	1.7488
T25C12.11	1.34682		F41D9.t1	0.79874		drh-3	3.62327
T25G12.6	1.93178		F41D9.t2	2.02113		dro-1	3.16384
T26H5.14	0.931779		F41E6.11	0.79874		dsb-1	1.7488
T27A3.4	1.34682		F41E6.12	0.79874		dsb-2	3.48577
T27E4.1	2.51674		F41E6.15	1.79874		dsc-4	3.16384
T27F6.8	1.34682		F41F3.8	2.67321		dyc-1	1.7488
T27F7.4	1.34682		F42A10.9	0.79874		dyn-1	3.62327
T28D9.3	0.931779		F42A10.t1	2.21378		dys-1	1.7488
taf-8	0.931779		F42G2.7	0.79874		E01G6.2	1.7488
taf-9	0.931779		F42H10.2	3.3837		E02C12.8	4.07073
tag-115	4.99067		F42H10.5	1.53571		E02H1.5	1.7488
tag-72	2.66874		F42H10.6	2.21378		E04F6.9	2.48577
tbc-1	0.931779		F43C11.7	0.79874		eaf-1	2.16384
tbc-16	1.93178		F43C9.t1	1.21378		ears-2	2.7488
tbck-1	0.931779		F43E2.1	0.79874		eat-17	3.9712
tiar-3	0.931779		F43G6.3	1.79874		ech-5	3.86428
tmc-1	1.93178		F43G6.8	2.21378		efl-1	1.7488
tofu-3	0.931779		F43H9.4	1.79874		efl-2	1.7488
trp-2	2.34682		F44A2.5	0.79874		efl-3	1.7488
trt-1	0.931779		F44A6.5	0.79874		efn-2	2.48577
tsp-15	2.34682		F44E2.10	2.21378		efsc-1	2.48577
tsp-20	0.931779		F44E2.6	1.21378		eftu-2	2.9712
ttr-31	2.15417		F44E2.9	1.21378		EGAP2.1	3.33377
tut-1	3.04726		F44E7.2	2.79874		egg-5	2.7488
tyms-1	1.34682		F44G4.3	1.21378		egl-19	3.48577
ucp-4	1.34682		F45E4.5	1.21378		egl-2	1.7488
ugt-13	0.931779		F45G2.10	2.21378		egl-44	4.6874
ugt-5	2.51674		F45G2.8	2.79874		ehbp-1	4.48577
ulp-3	0.931779		F46A8.13	1.53571		eif-3.D	3.9712
unc-119	0.931779		F46C5.1	2.21378		eif-3.K	4.55616
unc-3	0.931779		F46C5.2	2.3837		eif-6	3.33377
unc-6	1.93178		F46E10.2	0.79874		ekl-1	3.33377
vab-23	0.931779		F46F11.7	0.79874		ekl-4	1.7488
vps-16	0.931779		F46F11.8	2.53571		elp-1	2.7488
vps-33.2	1.93178		F46G11.t1	3.46171		elpc-1	1.7488
vps-37	1.93178		F46H5.4	0.79874		elpc-2	2.9712
W01A8.8	0.931779		F47B8.2	0.79874		elpc-3	1.7488
W02A11.1	0.931779		F47E1.17	1.21378		emb-1	2.16384
W02H5.17	1.34682		F47E1.5	0.79874		emc-2	4.41177
W03F8.6	2.34682		F47G3.1	0.79874		emc-6	2.48577
W04A8.2	0.931779		F48C1.6	1.21378		emr-1	4.8077
W04B5.1	1.93178		F48E3.8	0.79874		enu-3.1	2.16384
W05B2.8	0.931779		F48F7.6	1.21378		epg-2	2.16384
W09G12.10	1.66874		F49C5.4	1.21378		epg-4	2.9712
wago-11	1.66874		F49D11.10	0.79874		epg-6	4.07073
WBGene00007708	2.34682		F49E12.9	2.02113		epg-8	2.16384
WBGene00022583	0.931779		F49E8.2	3.73734		ephx-1	1.7488
WBGene00023251	1.34682		F49E8.6	2.53571		eps-8	4.33377
wve-1	2.66874		F52B5.3	3.79874		erd-2	5.37329
Y102A5C.2	0.931779		F52C12.1	3.73734		eri-1	1.7488
Y102A5C.6	1.34682		F52C9.3	0.79874		eri-12	4.7488
Y105C5A.t1	2.15417		F52D10.2	2.02113		eri-3	1.7488
Y105C5B.t1	0.931779		F52D2.7	0.79874		eri-7	1.7488
Y106G6G.2	0.931779		F52E1.2	0.79874		eri-9	3.62327
Y106G6G.4	0.931779		F52F10.2	0.79874		erp-1	3.48577
Y106G6H.16	1.66874		F52H2.4	0.79874		ess-2	1.7488
Y110A2AM.1	2.15417		F52H2.5	0.79874		esyt-2	1.7488
Y116A8C.43	0.931779		F52H3.4	0.79874		eva-1	1.7488
Y12A6A.2	0.931779		F52H3.5	1.21378		evl-14	1.7488
Y15E3A.5	1.34682		F53A9.6	2.3837		evl-20	2.16384
Y17G7B.19	1.34682		F53B6.t1	1.21378		exc-4	2.7488
Y17G9B.5	0.931779		F53E10.1	0.79874		exc-5	1.7488
Y18D10A.23	0.931779		F53F1.3	0.79874		exl-1	2.7488
Y18H1A.11	1.93178		F53F4.12	1.21378		exo-3	2.7488
Y18H1A.2	0.931779		F53F4.14	2.53571		exoc-7	2.7488
Y18H1A.9	1.34682		F53F4.16	2.67321		exoc-8	1.7488
Y22D7AL.15	2.51674		F53G12.16	0.79874		exos-3	2.48577
Y24F12A.4	1.66874		F53G2.1	1.21378		exos-4.2	2.16384
Y25C1A.8	1.66874		F54C9.11	0.79874		exp-1	2.48577
Y32G9B.1	0.931779		F54D10.5	2.02113		E_BE45912.2	2.7488
Y34B4A.7	2.15417		F54D5.11	2.67321		F01F1.11	1.7488
Y37B11A.3	2.34682		F54D5.17	0.79874		F01F1.2	3.86428
Y37D8A.25	0.931779		F54D5.5	2.3837		F01G4.4	1.7488
Y37D8A.3	2.34682		F54E7.9	2.3837		F02E9.7	1.7488
Y37E11B.6	0.931779		F54F7.3	2.02113		F07A5.2	1.7488
Y37H2A.16	2.93178		F55A11.11	0.79874		F08A7.1	1.7488
Y37H9A.5	1.34682		F55A11.8	2.79874		F08B4.8	1.7488
Y38F1A.2	0.931779		F55D12.1	0.79874		F08F8.10	1.7488
Y38F2AR.10	1.93178		F55E10.6	1.21378		F08G12.1	1.7488
Y38H6C.16	2.80625		F55F3.2	0.79874		F09B9.4	2.9712
Y39A3A.3	0.931779		F55F8.3	3.60609		F09E10.7	2.16384
Y39A3CR.5	1.93178		F55G1.5	0.79874		F09E5.8	1.7488
Y39B6A.10	0.931779		F55G1.7	1.21378		F09F9.2	2.16384
Y39B6A.36	2.80625		F55G1.9	2.67321		F09G2.2	3.48577
Y39B6A.37	2.15417		F56C11.3	0.79874		F09G2.8	3.7488
Y39B6A.40	1.66874		F56C9.11	0.79874		F10B5.2	3.33377
Y39C12A.1	0.931779		F56C9.8	0.79874		F10B5.8	1.7488
Y39C12A.2	0.931779		F56D2.2	2.53571		F10C2.4	1.7488
Y39G10AR.21	1.34682		F56D2.3	2.67321		F10C2.5	1.7488
Y40B1A.3	1.93178		F57B1.9	0.79874		F10D11.2	4.9712
Y43F8B.18	0.931779		F57B9.1	1.21378		F10E7.5	3.86428
Y43F8B.7	0.931779		F57C2.4	2.79874		F10G7.5	1.7488
Y43F8C.7	6.76467		F57H12.5	0.79874		F10G8.9	1.7488
Y43F8C.t3	1.93178		F57H12.6	1.21378		F11A10.5	3.86428
Y45F10A.3	0.931779		F58A4.6	2.21378		F11A3.2	1.7488
Y45G5AM.6	0.931779		F58B3.4	0.79874		F11C1.5	2.7488
Y48C3A.5	2.15417		F58D5.11	1.53571		F11D5.1	1.7488
Y48G1C.13	0.931779		F58D5.13	2.53571		F11E6.7	3.48577
Y48G9A.9	1.93178		F58D5.2	2.3837		F11F1.1	2.9712
Y4C6B.4	0.931779		F58E6.13	0.79874		F12A10.8	1.7488
Y51A2D.7	2.51674		F58G6.7	0.79874		F13A7.11	2.48577
Y51F10.11	2.34682		F58G6.9	0.79874		F13B12.1	2.9712
Y51H7C.7	1.93178		F58H1.3	3.02113		F13C5.5	1.7488
Y53C12A.8	0.931779		F58H1.8	1.79874		F13D12.10	1.7488
Y53G8B.t3	0.931779		F58H10.1	1.21378		F13D12.3	2.16384
Y54G11A.7	0.931779		F59A2.5	3.30124		F13D12.5	3.48577
Y54G2A.41	2.15417		F59A3.2	2.67321		F13D12.8	2.48577
Y55B1AL.2	1.66874		F59B10.3	0.79874		F13E6.5	1.7488
Y55B1BR.5	2.15417		F59B10.5	2.3837		F13E9.15	2.16384
Y56A3A.16	0.931779		F59B2.13	2.21378		F13G11.3	4.16384
Y57A10B.2	1.66874		F59C6.14	0.79874		F13G3.10	1.7488
Y57G11C.31	1.34682		F59D12.5	0.79874		F13G3.7	4.62327
Y57G11C.36	3.66874		F59E11.7	0.79874		F13H10.3	2.48577
Y57G11C.45	0.931779		F59F4.3	2.3837		F13H10.6	2.9712
Y57G11C.5	8.86449		F59G1.4	0.79874		F13H10.8	2.16384
Y59C2A.1	0.931779		F59H6.3	1.79874		F13H8.2	3.33377
Y59E9AL.36	0.931779		faah-1	2.67321		F13H8.5	2.7488
Y62E10A.6	1.34682		faah-2	3.02113		F14H3.5	1.7488
Y62F5A.14	0.931779		faah-3	2.02113		F15A4.6	1.7488
Y62F5A.16	1.34682		far-3	1.79874		F15A8.t1	3.33377
Y65B4BL.3	1.34682		far-7	0.79874		F15B9.10	3.62327
Y66A7A.2	0.931779		fat-7	0.79874		F15E6.3	2.48577
Y66D12A.16	0.931779		fbl-1	2.3837		F16C3.1	2.16384
Y67H2A.9	2.34682		fbxa-103	1.79874		F16G10.11	2.7488
Y69A2AR.19	1.34682		fbxa-145	1.21378		F17A9.2	2.7488
Y69A2AR.32	2.66874		fbxa-150	1.21378		F17A9.4	1.7488
Y69A2AR.t1	0.931779		fbxa-189	0.79874		F17C11.2	2.48577
Y71D11A.3	0.931779		fbxa-23	0.79874		F17C11.7	2.7488
Y71F9B.13	2.34682		fbxa-66	1.79874		F17E9.5	3.9712
Y71G12B.17	0.931779		fbxa-67	0.79874		F18C12.3	1.7488
Y71G12B.5	1.93178		fbxa-69	1.21378		F18E2.1	1.7488
Y71H2B.2	0.931779		fbxb-54	0.79874		F18E3.11	2.16384
Y73B3A.10	0.931779		fbxc-33	0.79874		F18E3.13	2.48577
Y73E7A.8	0.931779		fbxc-36	1.21378		F18F11.1	3.33377
Y73F8A.35	0.931779		fbxc-46	0.79874		F19B2.5	2.9712
Y7A9A.1	0.931779		fem-3	3.3837		F19C6.3	1.7488
Y82E9BR.17	1.34682		fil-1	0.79874		F19C6.4	1.7488
Y82E9BR.19	0.931779		fipr-1	3.02113		F19C7.8	1.7488
Y95D11A.t1	0.931779		fipr-13	1.21378		F19F10.12	1.7488
Y9D1A.1	0.931779		fkh-2	0.79874		F19F10.9	3.7488
zag-1	1.66874		flh-2	1.21378		F20D1.9	1.7488
ZC373.4	0.931779		flp-13	1.21378		F20D12.2	1.7488
ZC449.8	2.93178		flp-26	1.21378		F21A10.2	4.55616
zhit-3	0.931779		flp-27	1.21378		F21C10.7	2.16384
ZK105.1	2.93178		flp-32	0.79874		F21D12.3	4.33377
ZK1128.1	0.931779		flp-5	0.79874		F21D5.3	3.33377
ZK1240.9	0.931779		flp-6	2.02113		F21D5.5	1.7488
ZK1290.14	0.931779		flr-4	0.79874		F21H7.5	1.7488
ZK1307.1	2.51674		fmi-1	1.21378		F22B5.10	3.16384
ZK154.t2	0.931779		fmo-3	1.79874		F22B5.4	2.48577
ZK180.3	0.931779		fpn-1.1	1.21378		F22E5.9	2.7488
ZK185.5	1.34682		frh-1	1.21378		F22F1.t5	3.86428
ZK262.2	4.15417		frm-2	2.79874		F22F7.7	2.16384
ZK353.2	0.931779		frm-3	2.21378		F22H10.10	2.9712
ZK550.2	0.931779		frpr-1	1.21378		F23C8.13	1.7488
ZK616.3	0.931779		fshr-1	1.79874		F23H12.5	2.16384
ZK637.4	0.931779		ftn-1	3.12067		F25B4.4	2.16384
ZK643.2	1.34682		fut-8	0.79874		F25F2.1	2.16384
ZK688.9	0.931779		gad-3	2.79874		F25G6.9	1.7488
ZK757.2	2.15417		galt-1	0.79874		F25H2.4	4.16384
ZK813.5	0.931779		gck-4	4.12067		F25H2.7	1.7488
ZK836.3	0.931779		gcy-4	1.21378		F25H9.6	2.16384
ZK858.8	1.66874		gem-1	2.79874		F25H9.7	2.16384
ztf-13	1.34682		gfrp-1	1.79874		F26A1.14	1.7488
aap-1	0.931779		ghi-1	1.21378		F26A10.2	2.16384
atm-1	1.93178		glb-18	0.79874		F26A3.1	2.16384
B0286.1	2.15417		glc-1	1.21378		F26D2.10	1.7488
B0304.2	1.34682		glc-4	0.79874		F26E4.3	1.7488
B0353.1	3.51674		glna-1	0.79874		F26F4.5	1.7488
B0393.9	0.931779		glna-3	1.21378		F26H9.5	4.33377
B0432.14	2.51674		glo-4	1.79874		F27B3.7	1.7488
B0491.7	2.34682		glod-4	1.79874		F27C1.11	3.7488
bath-34	0.931779		glr-4	0.79874		F27C1.6	3.16384
best-24	1.66874		glr-5	0.79874		F28C10.3	1.7488
bir-1	2.51674		glrx-5	2.91422		F28C6.8	3.7488
brf-1	0.931779		gly-13	0.79874		F28D9.4	2.16384
btb-16	0.931779		gopc-1	2.53571		F28F5.6	1.7488
C01G10.7	1.34682		gpa-17	3.30124		F29A7.6	1.7488
C04A2.15	1.66874		gpa-7	2.67321		F29C6.1	1.7488
C05B5.8	0.931779		gpr-2	0.79874		F30A10.3	3.9712
C05D11.8	0.931779		grd-13	2.67321		F30F8.1	4.8077
C05E11.3	0.931779		grdn-1	1.21378		F31C3.3	4.16384
C06A6.5	0.931779		grl-10	0.79874		F31C3.6	1.7488
C07A9.9	2.15417		grl-25	0.79874		F31E9.11	2.7488
C07H6.4	2.51674		gro-1	1.79874		F31F4.1	1.7488
C11H1.3	0.931779		grsp-3	4.96867		F32A11.3	1.7488
C11H1.9	3.04726		gsp-3	0.79874		F32A5.3	1.7488
C14A4.9	1.34682		gst-33	0.79874		F32A5.4	4.48577
C14C11.7	0.931779		gst-42	2.91422		F32A7.4	2.48577
C15F1.2	1.93178		gst-6	1.21378		F32B4.4	4.2513
C16A11.2	0.931779		H04D03.2	0.79874		F32B5.7	1.7488
C16C10.1	2.51674		H05L14.2	1.79874		F32D1.7	3.62327
C17C3.1	0.931779		H10D12.2	0.79874		F32D8.11	2.16384
C17H12.11	0.931779		H10E21.4	1.21378		F32D8.14	2.48577
C18E3.9	0.931779		H10E21.5	3.21378		F32D8.4	1.7488
C23H3.9	0.931779		H14N18.4	3.67321		F32D8.5	1.7488
C24B5.1	0.931779		H20E11.1	1.21378		F33A8.4	3.48577
C25A11.1	1.34682		H23N18.5	2.67321		F33C8.4	1.7488
C25F6.7	2.51674		H35B03.2	3.73734		F33D11.10	4.33377
C25H3.11	0.931779		H35N09.t1	1.79874		F33D4.4	3.48577
C27D8.4	0.931779		H41C03.3	1.21378		F33H1.3	2.16384
C32F10.4	3.15417		hal-2	2.21378		F33H2.5	3.62327
C33D9.5	1.34682		haly-1	3.85763		F34D10.4	3.86428
C35D10.17	1.34682		ham-1	2.3837		F35A5.1	2.9712
C35D10.5	0.931779		hecw-1	0.79874		F35B3.4	1.7488
C36E6.2	1.34682		helq-1	1.79874		F35C11.6	1.7488
C37A2.8	1.34682		henn-1	3.85763		F35C5.1	1.7488
C38C3.4	0.931779		hex-3	1.79874		F35D11.5	2.9712
C41G7.3	1.34682		him-18	1.53571		F35E12.11	3.7488
C44B9.3	1.34682		him-19	0.79874		F35G12.12	3.33377
C44H9.5	0.931779		him-6	3.12067		F35G12.5	1.7488
C44H9.6	0.931779		hint-3	1.21378		F36A2.9	3.16384
C45G9.6	0.931779		his-31	2.53571		F36D1.9	2.16384
calu-2	0.931779		hke-4.1	1.79874		F36F2.2	1.7488
cdh-3	1.34682		hlh-2	0.79874		F36G3.1	2.7488
cec-2	0.931779		hmg-20	1.21378		F36G3.2	3.62327
ceh-100	2.34682		hot-9	1.53571		F36H5.14	4.33377
ceh-22	2.15417		hpo-5	2.02113		F36H9.5	2.7488
ceh-37	0.931779		hsp-1	7.69759		F37A4.1	2.7488
cel-1	2.66874		hsp-12.1	1.21378		F37A4.2	1.7488
cka-2	0.931779		hsp-16.41	2.3837		F37B12.1	1.7488
ckc-1	0.931779		htp-2	3.30124		F37C12.1	2.7488
ckk-1	1.34682		hyls-1	3.3837		F37C4.6	2.16384
clc-2	1.93178		igcm-2	0.79874		F37F2.2	2.48577
clec-173	1.93178		iglr-3	0.79874		F37H8.5	3.16384
clec-199	0.931779		ilys-3	4.12067		F38E9.1	1.7488
clec-80	1.34682		immp-2	0.79874		F39E9.7	1.7488
cup-5	2.34682		ina-1	2.02113		F39H2.3	3.16384
cyp-44A1	1.66874		ins-11	0.79874		F40A3.1	3.86428
D1046.2	2.15417		ins-24	3.12067		F40A3.2	2.9712
D1086.7	2.15417		inx-10	1.21378		F40B5.2	1.7488
D2030.8	0.931779		inx-2	0.79874		F40F11.3	2.16384
ddr-1	0.931779		inx-5	3.46171		F40F8.11	2.16384
del-9	1.34682		inx-7	1.21378		F40F8.5	4.55616
dgk-5	2.66874		irld-17	0.79874		F40G9.17	3.33377
dhs-30	2.51674		jac-1	3.30124		F40H3.6	1.7488
dod-24	0.931779		jip-1	3.12067		F40H6.1	2.7488
dpf-2	0.931779		jnk-1	2.21378		F41B4.1	2.9712
dpf-6	0.931779		K01A12.t1	1.53571		F41D9.2	3.16384
dpy-1	2.66874		K01B6.3	1.21378		F41E6.5	3.86428
dvc-1	0.931779		K01D12.9	0.79874		F41H10.3	1.7488
E01A2.1	2.15417		K01F9.2	2.02113		F42A10.7	2.16384
egrh-3	3.15417		K02B12.5	2.79874		F42A10.t1	3.16384
elpc-3	2.15417		K02B12.7	4.16797		F42A8.1	2.48577
elt-1	2.51674		K02C4.5	1.21378		F42A9.8	3.7488
evl-20	1.93178		K02E7.6	1.21378		F42C5.9	3.62327
exos-1	1.34682		K02F2.5	2.21378		F42F12.4	2.48577
F01D5.6	0.931779		K04A8.1	2.53571		F42G9.1	3.9712
F02E9.10	2.51674		K04C1.2	1.21378		F42H10.3	1.7488
F09B9.4	0.931779		K04G7.1	2.21378		F43C9.2	2.7488
F09E5.2	1.93178		K05C4.9	1.21378		F43D2.6	2.7488
F10B5.8	0.931779		K06B9.4	1.79874		F43G6.3	2.48577
F10E9.7	3.51674		K06H7.2	0.79874		F43G6.4	1.7488
F11A3.2	2.34682		K06H7.7	1.79874		F43G6.8	2.7488
F13D12.9	1.93178		K07A1.10	2.02113		F43G9.13	4.16384
F13G3.6	0.931779		K07A1.3	0.79874		F43G9.4	1.7488
F15E6.4	0.931779		K07A12.4	3.53571		F44A2.5	4.07073
F20C5.3	0.931779		K07B1.4	0.79874		F44A2.t1	2.48577
F25B4.7	0.931779		K07C11.8	0.79874		F44B9.2	3.33377
F25H5.5	0.931779		K07C5.2	2.3837		F44B9.8	1.7488
F26A3.1	0.931779		K07F5.12	1.21378		F44E2.4	1.7488
F35B12.10	2.34682		K07G5.7	1.79874		F44E5.1	4.55616
F35D11.4	1.34682		K08C7.1	0.79874		F44G4.3	2.7488
F36D3.1	0.931779		K08D10.14	0.79874		F45E1.4	1.7488
F37H8.2	0.931779		K08D8.4	0.79874		F46B6.4	1.7488
F38E9.t2	1.93178		K08D8.5	0.79874		F46C5.9	3.48577
F39G3.5	0.931779		K08D8.6	2.3837		F46C8.8	2.9712
F43E2.1	2.34682		K08D8.7	0.79874		F46F11.8	2.16384
F45B8.5	1.93178		K08E4.2	0.79874		F46F2.3	2.7488
F45E4.5	0.931779		K09F5.6	0.79874		F46G11.1	1.7488
F47A4.5	0.931779		K09F6.3	2.21378		F46H5.4	1.7488
F47H4.2	0.931779		K09H9.8	0.79874		F47B10.8	1.7488
F48A9.2	0.931779		K10B3.1	0.79874		F47B8.2	2.7488
F48E3.11	4.15417		K10B3.5	1.21378		F47F2.1	4.48577
F49E12.12	2.66874		K10B4.3	3.12067		F47G4.4	2.7488
F52B5.2	0.931779		K10D6.4	2.3837		F47H4.2	1.7488
F52D2.12	0.931779		K10G6.5	1.21378		F48A11.4	3.48577
F53A2.1	0.931779		K10G9.2	2.02113		F48C1.5	3.16384
F53B6.4	1.34682		K11B4.1	1.79874		F48C1.6	4.2513
F53C11.9	2.15417		K11B4.2	2.3837		F48D6.4	4.6874
F54D5.9	2.34682		K11D12.11	0.79874		F48E3.11	1.7488
F55G1.6	1.34682		K11D12.13	1.21378		F48E8.2	3.86428
F56D2.2	0.931779		K11G9.2	1.21378		F48E8.3	3.16384
F56G4.4	0.931779		K11H12.1	2.02113		F48E8.4	2.9712
F59B2.3	2.34682		K11H12.9	0.79874		F48F7.6	1.7488
F59C12.3	2.34682		K11H3.13	1.79874		F49C12.9	4.16384
fat-5	0.931779		K11H3.4	2.67321		F49D11.10	4.33377
fbf-1	0.931779		K12B6.9	1.53571		F49E12.12	1.7488
fbxa-60	1.34682		K12D12.5	2.3837		F49E2.2	3.62327
fbxc-50	0.931779		K12H4.2	1.21378		F49E8.2	2.7488
flp-8	1.66874		K12H4.5	3.30124		F49E8.7	1.7488
fpn-1.1	0.931779		kal-1	0.79874		F52A8.5	3.62327
frm-3	2.51674		kap-1	2.67321		F52C12.3	2.48577
frm-8	0.931779		kbp-2	1.21378		F52D2.12	1.7488
frpr-19	2.66874		kcnl-1	3.12067		F52F10.2	2.16384
gbh-2	0.931779		kcnl-2	1.53571		F52G2.3	2.9712
gcl-1	1.34682		kcnl-4	0.79874		F53A10.2	4.16384
gpa-12	0.931779		kin-32	2.67321		F53A9.8	4.2513
H10D18.5	1.93178		klf-1	1.79874		F53B1.4	2.16384
H14A12.3	1.93178		klo-2	0.79874		F53B1.8	2.7488
H20J04.4	0.931779		klp-11	0.79874		F53B6.5	2.7488
H22K11.2	2.15417		klp-8	1.21378		F53C11.3	3.33377
H41C03.1	0.931779		kmo-1	0.79874		F53E10.6	1.7488
hal-2	2.51674		lbp-1	3.53571		F53F4.11	3.62327
ham-1	1.34682		lbp-4	0.79874		F53F4.14	2.16384
hda-10	0.931779		lec-11	1.79874		F53F4.16	1.7488
hhat-1	1.93178		let-23	2.02113		F54A3.6	4.48577
homt-1	1.34682		let-756	1.53571		F54C1.1	3.16384
hot-1	1.34682		lgc-21	0.79874		F54C4.4	1.7488
hpo-24	2.15417		lgc-27	2.3837		F54C9.7	2.9712
hpo-35	0.931779		lgc-30	1.53571		F54C9.9	2.9712
ins-18	0.931779		lgc-38	0.79874		F54D11.4	3.16384
inx-2	0.931779		lgc-44	1.21378		F54D5.4	3.7488
K02E2.6	1.34682		lim-7	1.53571		F54D5.7	4.2513
K03H1.5	1.93178		lin-1	2.21378		F54D5.9	3.16384
K04A8.1	0.931779		lin-12	0.79874		F54E7.9	2.16384
K05C4.7	0.931779		lin-15B	2.91422		F54H5.5	1.7488
K07A1.10	0.931779		lin-17	1.79874		F55A12.2	1.7488
K07C11.8	2.34682		lin-18	0.79874		F55A12.5	3.16384
K07D4.1	0.931779		lin-2	1.79874		F55A3.3	5.07073
K09E4.1	0.931779		lin-25	1.79874		F55B11.1	1.7488
K09F6.7	2.51674		lin-29	3.79874		F55B11.2	2.7488
K09H11.1	0.931779		lin-3	3.12067		F55B11.4	2.16384
K11B4.2	1.34682		lin-56	0.79874		F55D12.2	3.33377
K12C11.6	0.931779		lin-8	1.79874		F55D12.5	3.86428
kin-32	0.931779		linc-11	0.79874		F55G1.6	2.16384
klp-10	1.34682		linc-2	1.53571		F55H12.2	3.62327
klp-20	0.931779		linc-40	0.79874		F55H12.3	1.7488
lat-2	0.931779		linc-61	1.21378		F55H2.7	1.7488
lbp-5	1.93178		lips-14	2.02113		F56A11.5	2.7488
lem-3	1.34682		lips-15	2.53571		F56A12.11	2.48577
lig-1	2.15417		lips-16	0.79874		F56B3.11	2.48577
lin-18	1.93178		lips-3	2.02113		F56B3.2	3.16384
lin-58	1.66874		lir-2	0.79874		F56B3.4	1.7488
linc-37	1.34682		lmp-2	0.79874		F56C11.5	2.16384
lpd-3	2.51674		lon-2	2.02113		F56C4.4	1.7488
lsm-3	3.15417		lon-3	1.21378		F56C9.3	3.16384
M04C3.1	0.931779		lpd-3	4.07176		F56C9.7	2.48577
mab-10	0.931779		lpr-1	0.79874		F56D3.1	2.16384
mdt-19	1.34682		lron-2	0.79874		F56D5.6	3.48577
mec-1	0.931779		lron-8	2.53571		F56F10.1	1.7488
mec-5	0.931779		lrr-1	2.02113		F57A10.4	2.16384
mgl-2	2.15417		lsd-1	0.79874		F57B9.1	2.9712
mir-87	0.931779		lsm-5	1.79874		F57C9.4	2.9712
miro-1	1.93178		lst-2	2.53571		F57H12.6	3.33377
mms-19	2.51674		M01H9.4	1.21378		F58A4.2	2.9712
mpst-3	0.931779		M02B1.2	1.79874		F58A4.6	2.7488
mrps-12	0.931779		M02B7.7	1.21378		F58A6.1	1.7488
mrps-9	0.931779		M03A1.8	0.79874		F58B3.4	2.9712
msp-33	0.931779		M03C11.6	0.79874		F58E10.7	2.7488
mtm-1	1.93178		M03D4.4	0.79874		F58E6.13	2.7488
nas-4	0.931779		M03F8.6	1.21378		F58G1.3	1.7488
nas-9	1.34682		M04B2.2	0.79874		F58G11.3	3.33377
ndnf-1	3.04726		M04B2.4	2.67321		F58H1.3	1.7488
ndx-3	0.931779		M04C3.1	1.79874		F58H1.7	1.7488
nhr-120	1.93178		M05B5.2	2.02113		F58H10.1	2.9712
nhr-13	0.931779		M05D6.6	3.3837		F59A2.2	4.91873
nhr-162	0.931779		M106.7	0.79874		F59A3.12	3.16384
nhr-17	0.931779		M110.3	2.67321		F59A3.2	2.48577
nhr-43	1.34682		M142.5	1.79874		F59A6.12	1.7488
nhr-74	0.931779		M176.4	2.53571		F59A6.5	1.7488
nhr-87	0.931779		M18.6	1.79874		F59C6.16	4.07073
nhr-91	2.15417		M195.2	0.79874		F59D12.1	2.48577
nlp-30	1.93178		M79.5	0.79874		F59E12.1	2.16384
nos-2	2.66874		mab-10	1.79874		faah-1	2.48577
nrf-5	1.93178		mab-20	2.67321		faah-2	2.9712
oxi-1	1.93178		mab-21	0.79874		fan-1	1.7488
pak-2	1.93178		mab-5	1.21378		far-7	3.16384
pdk-1	0.931779		madf-3	2.67321		farl-11	4.6874
pdr-1	3.51674		mage-1	2.3837		fars-2	4.48577
pifk-1	0.931779		magu-4	1.79874		fars-3	3.48577
plc-1	1.93178		mam-3	1.21378		fbf-1	3.16384
pmp-1	1.34682		math-26	0.79874		fbf-2	2.9712
poml-2	0.931779		mau-2	0.79874		fbl-1	1.7488
ppk-3	1.34682		mbd-2	1.79874		fbn-1	2.7488
pqn-15	2.15417		mcrs-1	3.21378		fbxa-106	4.07073
pqn-62	0.931779		mdt-1.2	0.79874		fbxa-187	1.7488
prk-2	0.931779		mdt-10	1.53571		fbxa-216	1.7488
psf-1	0.931779		mdt-20	0.79874		fbxa-59	1.7488
ptr-1	0.931779		mdt-21	1.21378		fbxc-16	2.16384
R06B9.5	1.66874		mdt-27	0.79874		fbxc-47	1.7488
R107.2	2.93178		mdt-30	2.3837		fce-1	3.48577
R119.2	0.931779		mes-1	0.79874		fce-2	1.7488
R151.8	0.931779		mig-13	0.79874		fcp-1	3.33377
rab-39	2.34682		mig-23	0.79874		fdps-1	2.16384
rba-1	0.931779		mir-124	0.79874		fem-2	1.7488
rbx-2	1.93178		mir-2214	4.46171		fic-1	2.16384
rec-8	2.15417		mir-229	1.79874		fig-1	3.86428
rep-1	1.66874		mir-235	1.21378		fip-2	2.16384
rga-5	0.931779		mir-62	3.21378		fip-5	1.7488
rig-1	0.931779		mir-70	0.79874		fipp-1	3.16384
rnf-113	0.931779		mir-82	0.79874		fipr-6	2.48577
rpac-40	2.15417		mkk-4	2.02113		fkb-3	2.16384
rpb-4	2.15417		mlc-7	0.79874		fkb-5	3.16384
rpy-1	3.66874		mltn-1	2.79874		flad-1	2.7488
secs-1	2.51674		mop-25.3	0.79874		flh-2	2.16384
set-14	0.931779		mpk-2	2.53571		flp-10	4.07073
set-3	0.931779		mpst-3	2.3837		flp-11	3.48577
set-30	0.931779		mpst-7	0.79874		flp-12	2.16384
set-31	0.931779		mre-11	2.79874		flp-16	3.33377
sftd-3	2.51674		mrp-6	1.79874		flp-17	1.7488
shk-1	2.34682		mrpl-13	2.79874		flp-21	2.16384
slx-1	2.15417		mrpl-22	0.79874		flp-22	1.7488
snpc-1.2	1.34682		mrpl-23	2.3837		flp-24	2.16384
sop-2	2.93178		mrpl-35	3.12067		flp-8	1.7488
sorb-1	0.931779		mrpl-36	2.02113		flu-2	2.48577
sur-2	3.43428		mrpl-37	3.30124		fmo-1	1.7488
sut-1	1.34682		mrpl-53	2.67321		fmo-4	1.7488
T03F6.4	2.66874		mrps-15	2.53571		fnci-1	1.7488
T04G9.4	1.93178		mrps-17	0.79874		fntb-1	2.16384
T05E8.3	0.931779		mrps-18C	3.46171		folt-2	4.07073
T07A9.10	2.66874		mrps-23	1.79874		fos-1	2.9712
T12C9.7	1.34682		mrps-25	2.21378		fox-1	2.16384
T16G12.1	2.15417		mrps-30	2.21378		fozi-1	2.16384
T19B10.3	0.931779		mrps-33	2.21378		fpn-1.1	1.7488
T19C4.5	0.931779		mrps-7	3.12067		frm-3	2.7488
T19D12.4	2.66874		mrt-1	2.3837		frm-5.1	2.7488
T20D3.8	2.93178		msp-31	0.79874		frm-8	2.16384
T20F5.4	1.66874		msp-36	2.02113		frpr-19	1.7488
T22C1.1	0.931779		msp-40	0.79874		fshr-1	1.7488
T23B3.2	0.931779		msp-50	1.21378		fut-2	3.33377
T25D10.4	2.51674		msp-57	0.79874		fut-3	3.33377
T28B4.1	0.931779		msp-78	1.21378		fut-6	1.7488
T28C12.4	0.931779		msp-81	1.53571		fut-8	2.16384
T28D6.3	3.43428		mth-1	0.79874		fzo-1	2.48577
taf-10	1.93178		mth-2	1.79874		gad-1	1.7488
taf-5	1.93178		mtm-1	0.79874		gad-3	1.7488
taf-6.1	0.931779		mus-81	2.21378		gap-2	2.7488
tag-304	3.43428		mut-14	2.02113		gbh-2	2.7488
tcl-2	1.34682		mvb-12	3.60609		gck-4	1.7488
tig-2	1.34682		nab-1	2.53571		gcp-2.1	2.48577
tpra-1	1.34682		nap-1	7.74125		gcs-1	2.16384
trm-1	2.15417		nape-2	0.79874		gcsh-1	2.48577
trp-4	1.93178		nars-2	1.53571		gei-13	3.16384
trpp-3	1.66874		nas-15	0.79874		gei-14	1.7488
ttr-21	0.931779		nas-4	0.79874		gei-15	3.86428
twk-39	2.51674		nas-9	3.21378		gei-8	2.7488
ubh-3	0.931779		ncam-1	2.3837		gen-1	3.9712
ugt-58	2.34682		ncx-10	1.21378		gex-2	1.7488
unc-129	0.931779		ncx-7	0.79874		gex-3	3.48577
use-1	1.93178		ndg-4	0.79874		gfm-1	2.16384
vamp-8	0.931779		ndx-4	2.21378		gipc-2	3.33377
W02A11.6	0.931779		ndx-6	1.53571		glb-1	3.48577
wht-2	2.51674		ndx-7	1.79874		glb-25	2.16384
Y105E8A.14	2.51674		nex-3	0.79874		glc-4	2.7488
Y106G6H.14	0.931779		nhr-101	2.53571		glh-2	3.48577
Y110A7A.15	0.931779		nhr-115	1.21378		glh-4	2.9712
Y111B2A.24	2.15417		nhr-117	0.79874		gln-1	2.7488
Y116A8C.9	3.51674		nhr-118	0.79874		gln-5	2.9712
Y11D7A.7	1.34682		nhr-120	1.53571		glo-2	2.9712
Y14H12B.2	1.93178		nhr-122	2.3837		glo-4	3.9712
Y25C1A.13	2.51674		nhr-13	2.79874		glrx-22	2.16384
Y34B4A.8	1.34682		nhr-130	1.53571		glrx-3	1.7488
Y37A1A.4	1.93178		nhr-146	1.79874		glrx-5	1.7488
Y38C1AA.12	1.93178		nhr-168	0.79874		glt-5	1.7488
Y38F2AR.3	3.04726		nhr-17	0.79874		gly-3	1.7488
Y38H8A.7	0.931779		nhr-173	1.79874		gly-4	2.7488
Y39B6A.42	2.51674		nhr-204	1.79874		gly-9	3.86428
aakb-1	0		nhr-210	0.79874		gmn-1	2.7488
aat-3	0		nhr-216	2.21378		gon-14	4.2513
abt-4	0		nhr-239	0.79874		gop-2	2.16384
abu-11	0		nhr-243	0.79874		gos-28	1.7488
ace-3	0		nhr-256	2.02113		gpa-17	2.16384
acr-16	0		nhr-36	0.79874		gpcp-2	3.62327
acr-17	0		nhr-37	1.79874		grd-1	2.16384
acr-2	0		nhr-42	2.67321		grd-14	4.91873
acy-2	0		nhr-43	2.02113		grd-6	3.62327
aex-3	0		nhr-58	0.79874		grh-1	2.9712
agt-2	0		nhr-59	1.79874		grl-15	2.16384
aly-1	0		nhr-61	3.30124		grl-21	2.16384
amx-1	0		nhr-63	1.79874		gsp-3	2.16384
angl-1	0		nhr-64	0.79874		gss-1	2.7488
anoh-2	0		nhr-69	0.79874		gst-10	2.16384
aps-2	0		nhr-80	2.21378		gst-4	1.7488
aptf-1	0		nhr-83	0.79874		gst-5	2.48577
aqp-4	0		nhx-2	0.79874		gst-7	3.86428
arrd-10	0		nhx-9	0.79874		gsto-1	1.7488
arrd-13	0		nipi-4	0.79874		gtl-1	3.33377
arrd-22	0		nlp-25	1.53571		H04D03.5	4.55616
atg-16.1	0		nlp-28	2.91422		H05C05.2	1.7488
athp-1	0		nlp-3	0.79874		H05C05.4	1.7488
B0205.1	0		nlp-47	0.79874		H05L03.3	2.16384
B0205.9	0		nlp-6	1.53571		H06H21.11	2.9712
B0244.6	0		nlr-1	0.79874		H06H21.8	3.7488
B0252.3	0		nmur-4	0.79874		H06I04.6	3.16384
B0284.3	0		npax-4	0.79874		H10D18.5	1.7488
B0285.3	0		npr-12	1.53571		H10E21.5	2.9712
B0336.5	0		npr-2	0.79874		H11E01.3	3.62327
B0365.9	0		npr-28	0.79874		H14N18.4	1.7488
B0393.5	0		npr-6	0.79874		H19N07.3	2.7488
B0432.10	0		nprl-2	1.21378		H20J04.6	2.16384
B0432.7	0		nprl-3	2.02113		H22K11.2	3.33377
B0507.2	0		nra-3	3.21378		H24K24.4	3.48577
bath-5	0		nspb-8	0.79874		H27A22.1	1.7488
bcs-1	0		nspc-18	1.21378		H28G03.2	4.07073
bec-1	0		nspc-4	1.79874		H35B03.2	1.7488
best-23	0		nspc-7	0.79874		H42K12.3	2.16384
best-5	0		nspd-2	2.67321		H43I07.3	5.02182
best-8	0		nspd-7	0.79874		haao-1	3.9712
blos-1	0		nspe-4	0.79874		haf-2	1.7488
blos-4	0		nstp-1	2.02113		haf-4	2.7488
bre-5	0		nstp-10	4.30124		hal-2	2.16384
btb-21	0		nsy-4	2.53571		haly-1	3.86428
C01A2.2	0		ntp-1	1.21378		har-2	3.16384
C01B9.1	0		nud-1	2.53571		hars-1	2.48577
C01G10.10	0		oac-14	0.79874		hbl-1	1.7488
C02B8.12	0		oac-33	1.79874		hcp-3	3.33377
C02F5.12	0		oac-57	0.79874		hcp-4	3.9712
C04A2.t1	0		octr-1	0.79874		hcp-6	1.7488
C04F12.1	0		oig-2	0.79874		helq-1	1.7488
C04F2.t1	0		olrn-1	2.02113		hex-5	2.48577
C05C8.2	0		orc-4	3.21378		hgap-1	3.86428
C05D2.8	0		osm-3	1.53571		hgap-2	3.33377
C06A6.2	0		otpl-1	2.53571		hhat-1	1.7488
C07A9.2	0		pamn-1	2.79874		hil-1	1.7488
C07B5.4	0		pash-1	3.67321		hil-3	2.9712
C07E3.3	0		pat-9	2.02113		him-14	3.16384
C08F11.1	0		pcbd-1	3.12067		him-17	1.7488
C09E7.4	0		pch-2	2.53571		him-8	2.7488
C09F5.1	0		pcm-1	2.67321		hint-1	3.48577
C09G1.4	0		pcp-3	2.67321		hint-3	2.16384
C09G1.5	0		pcp-4	0.79874		his-18	2.16384
C10B5.3	0		pcs-1	1.21378		his-37	2.7488
C10E2.1	0		pdk-1	0.79874		his-4	2.16384
C12D5.9	0		peb-1	2.3837		hke-4.1	3.33377
C13F10.5	0		pfn-3	2.53571		hmg-11	1.7488
C14B1.12	0		pgp-10	1.21378		hmg-20	3.33377
C14B1.3	0		pgp-3	0.79874		hmg-3	1.7488
C16A11.4	0		pgs-1	3.12067		hmp-2	3.33377
C17E7.4	0		pha-1	0.79874		hot-1	1.7488
C17E7.9	0		phf-30	3.02113		hpo-17	2.16384
C17F3.1	0		phf-31	1.79874		hpo-20	2.16384
C18B12.6	0		phg-1	2.53571		hpo-24	4.07073
C18E9.5	0		pho-14	2.91422		hpo-3	2.7488
C18H7.11	0		pho-9	2.3837		hpo-35	2.48577
C18H9.5	0		php-3	2.02113		hpo-4	2.9712
C23G10.5	0		piga-1	1.79874		hpo-40	2.9712
C23H3.5	0		pink-1	2.21378		hpo-5	1.7488
C25D7.5	0		pinn-4	1.21378		hpr-17	3.16384
C26E1.2	0		plc-3	0.79874		hrg-1	3.62327
C27A2.12	0		pll-1	2.3837		hrg-4	2.7488
C27B7.5	0		pme-4	1.79874		hrpf-1	3.48577
C27B7.7	0		pmk-2	0.79874		hst-3.1	1.7488
C27D9.1	0		png-1	2.67321		hum-4	2.7488
C28G1.10	0		pot-1	2.21378		hum-8	2.7488
C32D5.7	0		pot-2	1.21378		hut-1	4.7488
C33D9.3	0		ppat-1	0.79874		hyl-1	4.8077
C33G8.2	0		ppfr-2	2.21378		hyl-2	4.16384
C33H5.8	0		pqn-13	2.3837		hyls-1	1.7488
C34C12.7	0		pqn-15	2.53571		icp-1	2.7488
C34C6.3	0		pqn-24	0.79874		idi-1	2.9712
C34C6.4	0		pqn-29	0.79874		ifc-1	2.16384
C34H4.5	0		pqn-75	1.79874		ife-2	2.7488
C35D10.6	0		pqn-89	2.02113		ifp-1	1.7488
C35D10.7	0		prkl-1	0.79874		igdb-2	1.7488
C37E2.2	0		pro-1	1.79874		ilys-4	2.7488
C39B5.5	0		prp-4	1.79874		imp-3	4.07073
C39H7.1	0		prx-6	1.79874		inft-2	4.07073
C41G7.8	0		pry-1	2.91422		ing-3	3.62327
C42C1.8	0		psf-2	3.46171		inx-13	4.91873
C42D8.1	0		psf-3	1.79874		inx-16	3.62327
C44C11.6	0		pssy-2	3.79874		inx-18	2.16384
C45B2.6	0		ptb-1	0.79874		inx-5	2.48577
C45E5.1	0		ptl-1	0.79874		inx-7	1.7488
C45G3.4	0		ptp-4	0.79874		ipp-5	1.7488
C45G9.12	0		ptr-10	2.3837		ire-1	4.41177
C45G9.5	0		ptr-11	0.79874		irx-1	2.16384
C46C11.2	0		ptr-12	2.21378		jac-1	3.33377
C46C11.3	0		ptr-18	0.79874		jmjd-2	3.48577
C47D2.1	0		ptr-21	0.79874		jmjd-3.1	1.7488
C48B4.11	0		puf-10	1.21378		jmjd-5	3.33377
C49A9.3	0		pyk-2	0.79874		jnk-1	1.7488
C49F5.9	0		pzf-1	1.79874		K01A11.1	2.48577
C50B6.7	0		R02D5.1	0.79874		K01A12.t1	2.16384
C50F4.1	0		R02D5.8	0.79874		K01A2.5	2.16384
C52B11.5	0		R02E4.3	1.79874		K01A6.t1	1.7488
C52G5.2	0		R02F11.4	2.53571		K01D12.9	2.48577
C54E4.5	0		R03A10.14	1.79874		K02A6.3	1.7488
C54G4.5	0		R03C1.1	0.79874		K02B12.7	2.9712
C56C10.9	0		R03H10.1	0.79874		K02B7.3	1.7488
C56E6.2	0		R04B3.2	0.79874		K03B8.6	2.48577
cca-1	0		R04D3.2	1.21378		K03E6.7	2.16384
ccch-3	0		R04F11.t1	0.79874		K03H6.2	2.7488
ccdc-55	0		R05C11.4	3.02113		K04F10.9	2.16384
ccpp-6	0		R06B9.5	2.3837		K04G2.4	1.7488
cdf-2	0		R06C7.2	0.79874		K04G2.9	3.48577
cdk-4	0		R07E5.15	0.79874		K05C4.7	1.7488
cdt-1	0		R07E5.4	2.67321		K06A1.2	1.7488
ceeh-1	0		R07H5.11	2.53571		K06A4.t1	2.48577
ceh-13	0		R08B4.3	0.79874		K06A5.2	2.16384
cfz-2	0		R08F11.1	0.79874		K06G5.1	2.9712
clec-230	0		R09A8.2	0.79874		K07A1.1	2.7488
clec-78	0		R09F10.1	0.79874		K07A1.10	2.7488
cln-3.1	0		R09F10.8	1.79874		K07A1.9	4.07073
clp-4	0		R102.4	2.02113		K07A12.1	1.7488
cog-1	0		R106.5	3.53571		K07A12.4	1.7488
cogc-5	0		R107.2	0.79874		K07A9.3	1.7488
col-135	0		R10D12.1	0.79874		K07B1.7	1.7488
col-62	0		R10E11.13	2.02113		K07C5.3	1.7488
col-7	0		R10E4.1	2.02113		K07E3.9	2.9712
comt-5	0		R10E8.1	0.79874		K07E8.7	1.7488
cpna-5	0		R10E8.7	3.12067		K07F5.14	1.7488
crb-1	0		R10E8.9	1.21378		K08B12.3	1.7488
csb-1	0		R10E9.2	0.79874		K08D8.3	3.33377
cth-1	0		R10H10.3	0.79874		K08D8.7	2.7488
cutl-26	0		R10H10.7	0.79874		K08F9.4	2.48577
cyd-1	0		R119.2	2.53571		K09F6.7	3.86428
cyp-13A5	0		R11G1.6	2.3837		K09H11.1	1.7488
cyp-33C7	0		R12C12.10	0.79874		K09H9.7	1.7488
cyp-37A1	0		R12E2.8	0.79874		K10B2.4	3.33377
cyp-42A1	0		R13A5.9	1.79874		K10B4.3	1.7488
cyp-43A1	0		R144.12	1.79874		K10C3.5	1.7488
D1009.3	0		R144.3	2.91422		K10C9.3	1.7488
D1054.8	0		R144.5	1.79874		K10H10.10	2.7488
D1081.9	0		R166.3	0.79874		K10H10.14	9.87809
D1086.2	0		R17.3	0.79874		K10H10.4	3.7488
D1086.8	0		R53.5	2.02113		K11B4.1	2.7488
daf-25	0		R74.7	1.53571		K11D12.13	2.16384
daf-36	0		rab-14	3.53571		K11E4.t1	2.9712
dct-5	0		rab-21	1.21378		K11G12.6	2.16384
ddl-1	0		rab-30	2.02113		K11H12.9	2.7488
dhcr-7	0		rab-37	0.79874		K12B6.9	1.7488
dhs-14	0		rab-39	1.21378		K12H4.4	3.48577
dhs-3	0		rac-3	1.79874		K12H4.7	4.41177
dnc-2	0		rad-51	2.3837		kbp-2	2.16384
dnj-10	0		rad-54	2.3837		kbp-3	1.7488
dop-3	0		rad-8	1.21378		kbp-4	2.48577
dpf-4	0		rbf-1	2.79874		kin-18	4.16384
dpy-20	0		rde-4	3.02113		klc-2	2.16384
E01A2.5	0		rep-1	2.53571		klo-1	2.7488
E01B7.2	0		repo-1	3.53571		klp-10	3.48577
E02H1.1	0		reps-1	0.79874		klp-12	5.52139
ebax-1	0		rev-1	0.79874		klp-16	4.2513
ech-8	0		rga-5	0.79874		knl-3	2.48577
eff-1	0		rgs-1	0.79874		kpc-1	4.07073
elp-1	0		rgs-11	1.21378		lab-1	3.16384
elt-7	0		rgs-2	0.79874		lact-5	1.7488
erl-1	0		rgs-9	0.79874		lap-1	3.86428
ethe-1	0		rha-2	3.12067		lbp-3	2.48577
ets-9	0		rhgf-1	0.79874		lbp-4	2.16384
exo-1	0		rhi-1	2.53571		lbp-5	3.86428
F07H5.7	0		rimb-1	3.02113		lbp-7	2.9712
F07H5.8	0		riok-3	2.79874		ldh-1	4.2513
F08A7.1	0		rnp-3	0.79874		lem-3	4.07073
F08B4.8	0		rpb-10	2.21378		leo-1	2.16384
F08B6.1	0		rpb-6	2.21378		let-19	3.16384
F08G5.6	0		rpb-7	2.53571		let-413	4.2513
F09E5.16	0		rpb-8	3.91422		let-504	1.7488
F10C1.8	0		rpl-26	7.33272		let-716	4.48577
F10D2.10	0		rpn-12	4.21378		let-721	3.62327
F10D7.3	0		rpt-5	3.85763		let-858	3.16384
F10F2.2	0		rpy-1	4.07176		let-99	2.16384
F13B12.3	0		rrn-4.16	1.53571		lgc-31	1.7488
F13B9.2	0		rsf-1	2.21378		lgc-32	1.7488
F13D2.1	0		sams-5	2.91422		lgc-34	2.16384
F13E6.5	0		sbp-1	3.3837		lgc-40	2.7488
F14F9.4	0		scrm-1	0.79874		lig-1	1.7488
F14H3.5	0		sdc-1	1.53571		lin-3	1.7488
F16A11.2	0		sdc-2	0.79874		lin-37	1.7488
F16B4.5	0		sec-15	0.79874		lin-39	2.7488
F16C3.2	0		sec-3	0.79874		lin-40	3.33377
F17A9.5	0		sedl-1	1.53571		lin-52	2.16384
F18C5.5	0		ser-4	2.02113		lin-59	4.48577
F18E3.11	0		set-10	0.79874		lin-61	4.33377
F20B10.3	0		set-24	2.79874		lin-65	3.16384
F20D6.11	0		set-26	4.8862		lin-7	2.48577
F21F12.1	0		set-31	2.79874		lin-8	1.7488
F21G4.1	0		set-4	3.96867		linc-108	1.7488
F22D3.6	0		sex-1	1.79874		linc-11	2.48577
F22E12.1	0		sgca-1	1.21378		linc-14	2.9712
F22H10.2	0		shw-1	2.53571		linc-2	2.7488
F23F1.10	0		sid-2	0.79874		linc-8	4.33377
F23F1.4	0		sinh-1	2.3837		linc-89	1.7488
F23F12.13	0		sir-2.2	2.91422		lmd-1	3.33377
F23F12.3	0		ska-3	1.21378		lon-2	2.7488
F26A1.14	0		skr-14	0.79874		lon-3	2.9712
F26F12.4	0		skr-19	0.79874		lpd-3	3.48577
F26F4.9	0		skr-20	0.79874		lpd-8	2.16384
F27D4.6	0		skr-7	2.02113		lpd-9	5.07073
F28F8.5	0		slc-17.1	2.3837		lpr-1	1.7488
F29A7.6	0		slc-17.4	0.79874		lpr-4	3.62327
F29G6.1	0		slc-17.6	0.79874		lpr-6	3.16384
F31A3.5	0		slc-17.7	0.79874		lron-11	1.7488
F31C3.6	0		sld-2	2.53571		lron-8	3.86428
F32A7.4	0		slo-1	2.02113		lrp-2	4.86428
F32B5.4	0		smi-1	0.79874		lrr-1	2.16384
F32H2.8	0		sms-2	0.79874		lsm-1	3.16384
F33A8.7	0		sms-3	2.02113		lsm-5	2.7488
F33E11.2	0		smut-1	3.21378		lsm-7	3.62327
F35D2.1	0		smy-8	9.04667		lst-6	4.07073
F35E12.4	0		snb-2	1.21378		lsy-12	4.2513
F35H10.6	0		snrp-27	1.21378		lsy-2	4.07073
F36A2.10	0		snt-1	2.02113		ltd-1	1.7488
F38A6.5	0		snt-3	1.21378		M01B12.4	5.02182
F38B7.2	0		sor-3	0.79874		M01E11.1	1.7488
F39B2.3	0		spdl-1	3.12067		M01E11.3	1.7488
F39D8.3	0		spe-44	0.79874		M01F1.4	1.7488
F39H11.1	0		sphk-1	2.91422		M01F1.8	2.9712
F40A3.4	0		spon-1	0.79874		M01G5.1	3.33377
F40H3.6	0		spp-15	2.02113		M02B1.2	2.7488
F41C3.2	0		spp-23	2.53571		M02B7.7	2.16384
F41C6.7	0		sptf-1	0.79874		M02D8.6	1.7488
F41E7.1	0		sptf-3	3.85763		M02H5.8	1.7488
F41E7.15	0		sqv-8	0.79874		M03C11.3	1.7488
F41G3.10	0		srd-21	2.21378		M03C11.8	2.7488
F42G4.6	0		sre-45	0.79874		M03D4.4	2.9712
F43G6.3	0		sre-53	0.79874		M03F8.3	1.7488
F43G6.4	0		srg-34	0.79874		M04C3.1	1.7488
F44A6.5	0		sri-40	0.79874		M04C9.4	1.7488
F44E2.10	0		srj-14	1.21378		M04F3.4	3.48577
F45E10.2	0		srsx-34	1.21378		M04F3.5	2.7488
F45H11.5	0		ssup-72	2.21378		M106.2	2.7488
F48C1.12	0		sta-2	0.79874		M116.2	1.7488
F48C1.5	0		stip-1	1.21378		M142.8	1.7488
F48G7.8	0		stn-1	1.79874		M153.1	2.16384
F49C12.7	0		sto-1	1.79874		M18.6	1.7488
F49E8.7	0		sto-4	3.67321		M28.10	3.86428
F49F1.5	0		sto-5	0.79874		M70.5	1.7488
F52H3.4	0		str-176	1.21378		M79.2	1.7488
F53F8.3	0		strd-1	2.53571		M88.7	3.48577
F53H4.2	0		sulp-8	0.79874		mab-10	1.7488
F55A11.8	0		supr-1	0.79874		madf-8	2.16384
F55A4.8	0		swan-2	3.3837		maea-1	3.48577
F55E10.6	0		swd-2.1	2.02113		mafr-1	1.7488
F56G4.6	0		swsn-3	3.79874		mag-1	4.16384
F57C2.4	0		swt-4	0.79874		mage-1	1.7488
F58F9.4	0		swt-7	0.79874		mak-2	2.9712
F58H1.5	0		syd-1	0.79874		mam-1	1.7488
F58H1.6	0		syd-9	2.91422		mans-2	2.48577
F58H1.8	0		sym-3	0.79874		mans-4	2.48577
F59A3.2	0		syx-17	0.79874		mat-1	5.02182
F59A7.5	0		syx-4	2.3837		math-26	2.7488
fan-1	0		T01B6.1	0.79874		math-3	3.48577
fbxa-107	0		T01C3.2	1.79874		math-35	3.33377
fbxa-128	0		T01C8.2	2.02113		math-41	2.16384
fbxa-34	0		T01D1.4	2.91422		mau-2	2.7488
fbxa-54	0		T01E8.1	1.79874		max-1	1.7488
fbxa-69	0		T02B11.8	0.79874		mbd-2	2.7488
fbxa-90	0		T02B5.1	0.79874		mbk-1	2.16384
fbxc-45	0		T03G11.6	2.79874		mcd-1	2.16384
fce-2	0		T03G6.3	2.79874		mcm-5	2.7488
fhod-1	0		T04C12.3	0.79874		mdf-1	2.16384
flp-21	0		T04F8.7	0.79874		mdl-1	4.07073
flp-25	0		T05A6.8	1.21378		mdt-11	2.7488
fmi-1	0		T05A7.1	0.79874		mdt-17	4.2513
fmo-1	0		T05B11.1	2.67321		mdt-18	2.7488
fut-8	0		T05E12.10	0.79874		mdt-19	3.86428
gck-4	0		T05F1.4	1.79874		mdt-20	1.7488
gei-14	0		T05F1.8	0.79874		mdt-22	4.55616
gem-4	0		T05H10.3	0.79874		mdt-29	2.16384
ggr-1	0		T06A4.1	1.21378		mec-12	1.7488
glb-11	0		T06D8.10	1.53571		mec-8	2.16384
glb-25	0		T06E4.10	1.79874		mec-9	3.16384
gln-1	0		T06E4.12	1.79874		meg-1	2.7488
glna-2	0		T06E4.8	0.79874		mei-1	3.86428
glr-4	0		T06F4.1	3.79874		mek-1	3.48577
gly-19	0		T07A5.5	2.67321		memb-2	1.7488
gnrr-4	0		T07A9.8	1.79874		met-1	4.7488
gpr-2	0		T07C12.15	0.79874		met-2	3.7488
grd-2	0		T07C4.12	1.21378		mfap-1	1.7488
gst-4	0		T07D10.8	2.02113		mfn-1	3.48577
gsto-1	0		T07F10.1	2.02113		micu-1	3.62327
H04M03.12	0		T07F12.2	2.67321		mif-2	2.7488
H06H21.8	0		T08B1.4	0.79874		mig-14	1.7488
H09F14.1	0		T08D2.9	2.53571		mig-15	4.2513
H10E21.1	0		T08G2.2	0.79874		mir-229	3.7488
hda-2	0		T09B4.4	0.79874		mir-4937	2.16384
hecw-1	0		T09B9.1	1.79874		mir-51	2.16384
hex-4	0		T09B9.4	3.21378		mir-57	2.16384
him-6	0		T09F3.5	0.79874		mir-62	2.9712
hlh-1	0		T10B11.8	0.79874		mir-65	1.7488
hlh-2	0		T10B5.10	0.79874		mlc-7	3.16384
hmg-5	0		T10D4.1	0.79874		mlk-1	3.9712
hog-1	0		T10F2.5	1.21378		mlt-9	2.9712
hot-2	0		T10G3.3	1.53571		mmab-1	2.16384
hpo-42	0		T11B7.5	0.79874		mmcm-1	4.9712
hst-2	0		T11F8.1	0.79874		mms-19	2.16384
ifa-3	0		T11G6.2	0.79874		moa-2	2.7488
iglr-1	0		T12B3.2	0.79874		mog-1	1.7488
ina-1	0		T12C9.7	1.79874		mom-4	2.7488
ins-1	0		T12F5.2	1.21378		moma-1	3.7488
inx-17	0		T12G3.4	2.21378		mon-2	2.7488
jkk-1	0		T13C5.6	1.21378		mps-2	4.07073
K01A11.2	0		T13G4.1	0.79874		mpst-3	1.7488
K01B6.3	0		T13H5.1	4.25817		mre-11	1.7488
K01G5.10	0		T14B4.2	2.3837		mrp-7	5.2513
K02A6.6	0		T14B4.8	0.79874		mrpl-10	2.7488
K02E11.3	0		T15H9.2	2.79874		mrpl-11	2.7488
K03H1.11	0		T16G1.2	1.21378		mrpl-17	2.9712
K07E8.7	0		T18D3.1	1.21378		mrpl-18	3.16384
K08C7.1	0		T19C4.5	0.79874		mrpl-19	2.9712
K08D10.12	0		T19D12.1	2.02113		mrpl-2	2.9712
K08E4.3	0		T19D2.1	0.79874		mrpl-20	4.2513
K08F9.4	0		T20B3.1	2.79874		mrpl-28	2.16384
K09C4.10	0		T21B10.4	3.12067		mrpl-34	2.7488
K09C4.5	0		T22B2.6	0.79874		mrpl-36	2.48577
K09C8.7	0		T22C1.3	3.21378		mrpl-40	1.7488
K09F5.6	0		T22C1.6	3.02113		mrpl-46	3.33377
K09H9.2	0		T23B12.8	0.79874		mrpl-47	2.48577
K10C9.1	0		T23F2.5	3.12067		mrpl-51	3.86428
K11E4.1	0		T23F4.2	1.21378		mrpl-53	3.16384
K11H3.8	0		T23G4.3	1.21378		mrps-14	2.9712
K12B6.9	0		T23G7.3	2.91422		mrps-18B	2.7488
K12C11.7	0		T24C12.3	0.79874		mrps-21	2.7488
kin-16	0		T24C2.2	0.79874		mrps-23	1.7488
knl-2	0		T24C4.5	0.79874		mrps-26	2.48577
let-268	0		T24D5.6	1.21378		mrps-30	2.16384
let-49	0		T24H10.4	3.91422		mrps-35	3.7488
lev-8	0		T25B9.1	2.91422		mrps-7	1.7488
lev-9	0		T26A5.2	0.79874		mrt-1	4.16384
lgc-46	0		T27A1.5	0.79874		msh-2	2.7488
linc-124	0		T27A3.4	1.53571		msh-5	3.48577
linc-81	0		T27A3.6	1.21378		msh-6	3.62327
lipl-6	0		T27E4.1	2.53571		msp-19	1.7488
lips-3	0		T27E4.11	2.53571		msp-3	3.7488
lips-7	0		T27F7.4	1.53571		msp-33	2.9712
lpd-2	0		T28B11.20	0.79874		msp-36	2.7488
lurp-1	0		T28B11.3	1.21378		msp-50	2.7488
M01E11.1	0		T28B4.1	1.79874		msp-56	2.9712
M01E5.2	0		T28C6.5	2.3837		msp-57	3.7488
M01H9.5	0		T28D9.3	1.79874		msp-59	2.16384
M03F8.1	0		T28F4.6	0.79874		msp-64	3.48577
M116.2	0		taf-10	2.67321		msp-71	2.48577
M18.6	0		taf-11.3	1.79874		msp-77	2.7488
mab-7	0		taf-2	2.53571		mspn-1	2.7488
magu-1	0		taf-7.2	2.02113		mtm-6	3.48577
magu-2	0		tag-229	2.67321		mua-6	1.7488
math-41	0		tag-231	2.21378		mut-15	1.7488
mau-8	0		tag-244	0.79874		mut-7	2.7488
max-1	0		tag-257	0.79874		mutd-1	2.16384
mbd-2	0		tag-266	2.67321		mvb-12	1.7488
mbtr-1	0		tag-276	0.79874		mxl-1	2.9712
mdt-1.2	0		tag-280	0.79874		mxl-3	4.2513
mig-2	0		tag-299	3.12067		myo-5	2.7488
mig-23	0		tag-307	3.46171		mys-4	3.86428
mis-12	0		tag-343	0.79874		nab-1	2.7488
mltn-13	0		tag-52	1.79874		nac-1	2.7488
molo-1	0		tag-63	2.02113		nas-11	2.16384
mpk-2	0		tag-68	3.02113		nas-37	2.9712
mrp-2	0		tag-72	2.53571		nas-39	3.9712
mrpl-13	0		tbb-4	0.79874		nas-5	1.7488
msh-4	0		tbc-11	3.12067		nas-7	1.7488
msp-56	0		tbc-18	2.02113		nasp-1	3.33377
mut-14	0		tbcc-1	0.79874		nath-10	2.7488
nac-1	0		tdpt-1	0.79874		ncbp-1	4.91873
nape-1	0		tfbm-1	0.79874		ncx-7	1.7488
nas-27	0		tftc-3	1.21378		ndc-80	1.7488
nas-31	0		thn-1	0.79874		ndg-4	4.33377
nas-38	0		thn-5	1.79874		ndnf-1	3.33377
ncx-3	0		tin-9.2	2.91422		nduf-2.2	3.86428
nex-3	0		tir-1	3.60609		ndx-2	1.7488
nfya-1	0		tli-1	1.79874		ndx-7	2.9712
nhr-100	0		tmc-2	1.79874		ndx-8	3.33377
nhr-103	0		tmd-2	1.53571		ndx-9	2.9712
nhr-106	0		tofu-1	1.21378		ned-8	2.16384
nhr-109	0		tofu-3	1.21378		nep-1	1.7488
nhr-121	0		tofu-4	0.79874		nep-2	2.9712
nhr-153	0		top-3	2.02113		nep-22	3.16384
nhr-16	0		tpk-1	0.79874		nep-26	2.7488
nhr-170	0		tpra-1	1.21378		nfi-1	4.7488
nhr-182	0		tra-4	0.79874		nfya-2	2.16384
nhr-69	0		tre-2	3.46171		nfyb-1	2.16384
nhr-90	0		tre-3	2.79874		nhr-10	3.33377
nipi-4	0		trm-1	1.79874		nhr-109	2.7488
nlp-35	0		trpa-1	2.21378		nhr-110	1.7488
npr-23	0		trpp-3	2.21378		nhr-119	1.7488
nsy-7	0		tsp-10	1.21378		nhr-134	1.7488
parn-1	0		tsp-21	0.79874		nhr-136	2.7488
paxt-1	0		ttll-15	0.79874		nhr-137	1.7488
PDB1.1	0		ttm-1	1.79874		nhr-138	4.33377
pgs-1	0		ttr-26	1.53571		nhr-144	2.9712
phat-2	0		ttr-3	0.79874		nhr-145	1.7488
phf-31	0		ttr-35	1.21378		nhr-151	1.7488
polh-1	0		ttr-49	1.21378		nhr-173	3.48577
pot-2	0		ttr-5	2.91422		nhr-179	1.7488
pot-3	0		ttr-6	1.53571		nhr-18	1.7488
ppat-1	0		ttr-7	0.79874		nhr-19	1.7488
pqbp-1.1	0		ttr-8	0.79874		nhr-204	1.7488
pqn-21	0		tut-2	1.21378		nhr-23	4.48577
pqn-25	0		twk-1	0.79874		nhr-28	2.16384
prdx-6	0		twk-28	1.79874		nhr-32	1.7488
prkl-1	0		twk-29	0.79874		nhr-35	2.7488
pros-1	0		twk-39	2.21378		nhr-41	3.16384
prx-13	0		twk-49	3.30124		nhr-45	1.7488
psf-3	0		tyr-1	1.79874		nhr-48	2.7488
psmd-9	0		ubc-14	3.02113		nhr-65	1.7488
pssy-2	0		ubc-17	0.79874		nhr-69	1.7488
ptr-20	0		ubc-26	2.3837		nhr-71	2.7488
pvf-1	0		ufc-1	3.46171		nhr-76	3.16384
R04B5.5	0		ugt-4	0.79874		nhr-80	1.7488
R06C1.6	0		ugt-5	1.79874		nhr-86	1.7488
R07B7.6	0		ugt-60	0.79874		nlg-1	2.16384
R07E5.11	0		ugt-61	0.79874		nlp-11	1.7488
R08E3.2	0		ugtp-1	1.21378		nlp-20	3.16384
R09F10.1	0		ula-1	4.12067		nlp-29	3.48577
R102.4	0		unc-10	2.3837		nlp-31	3.7488
R105.1	0		unc-129	1.79874		nlp-38	2.16384
R10D12.1	0		unc-42	0.79874		nlp-47	1.7488
R10E11.6	0		unc-7	0.79874		nlp-9	2.7488
R10E8.6	0		unc-77	1.21378		nol-10	1.7488
R10E9.3	0		unc-78	3.3837		nol-6	2.9712
R10H10.7	0		unc-79	3.3837		npl-4.2	1.7488
R11A8.1	0		usp-33	0.79874		npp-16	3.33377
R166.3	0		vab-23	1.21378		npp-19	3.7488
R173.3	0		vab-9	0.79874		npp-2	3.33377
R74.6	0		valv-1	0.79874		npp-21	3.62327
rabn-5	0		vap-1	0.79874		npp-22	5.02182
rad-54	0		VH15N14R.1	0.79874		npp-23	2.9712
rbbp-5	0		VM106R.1	2.53571		npp-4	4.07073
rde-10	0		vps-22	3.85763		npp-5	1.7488
reps-1	0		vps-52	2.02113		nprl-3	2.7488
rfs-1	0		vti-1	2.53571		nra-1	3.48577
rhgf-1	0		W01A8.2	1.53571		nra-3	3.16384
rhy-1	0		W01A8.6	1.21378		nrd-1	3.86428
rig-3	0		W01C8.5	3.46171		nrde-1	3.16384
rom-5	0		W02B12.10	2.3837		nrde-4	3.16384
rpom-1	0		W02B8.2	2.02113		nrf-6	3.86428
scl-3	0		W02C12.2	0.79874		nspb-8	2.48577
scrm-4	0		W02D7.6	0.79874		nspc-13	2.7488
sdc-2	0		W02F12.8	2.53571		nspc-14	2.48577
seb-2	0		W02G9.4	0.79874		nspd-2	3.62327
sec-8	0		W02G9.t1	1.21378		nspd-6	1.7488
set-6	0		W02H5.8	1.79874		nst-1	4.48577
set-9	0		W03C9.1	0.79874		nstp-1	2.7488
skr-21	0		W03D2.13	2.02113		nstp-4	3.48577
slc-17.1	0		W03D8.8	1.79874		nsy-1	3.9712
slc-17.4	0		W03F8.3	2.21378		nsy-4	3.62327
slc-17.6	0		W03G11.3	1.53571		ntl-11	4.07073
slc-17.7	0		W04A4.5	2.3837		ntp-1	3.62327
smg-8	0		W04A4.6	0.79874		nuaf-3	1.7488
sms-2	0		W04B5.1	0.79874		nubp-1	3.9712
smut-1	0		W05B2.8	1.79874		nud-1	3.62327
sng-1	0		W05H7.1	2.02113		nud-2	2.9712
sor-3	0		W06D11.3	1.79874		nxf-2	3.16384
spds-1	0		W06G6.20	0.79874		nxt-1	2.9712
spe-44	0		W07B8.3	1.79874		obr-3	1.7488
spin-1	0		W07E6.2	2.53571		ocrl-1	3.48577
spp-22	0		W07G1.24	2.91422		odr-4	2.48577
spr-3	0		W08A12.3	0.79874		odr-8	3.86428
sprr-3	0		W09B6.5	1.21378		ora-1	1.7488
sptf-1	0		W09D6.t1	1.79874		orai-1	3.16384
srab-12	0		W10D9.6	1.79874		orc-5	2.16384
sri-40	0		W10G11.19	1.79874		osm-3	1.7488
sri-44	0		WBGene00001147	1.79874		osm-7	2.7488
sss-1	0		WBGene00010308	1.21378		otub-2	4.55616
ssu-2	0		WBGene00165651	0.79874		otub-3	1.7488
ssup-72	0		wdr-46	2.53571		oxi-1	1.7488
stau-1	0		wdr-48	3.02113		oxy-5	4.48577
stdh-1	0		wht-2	4.76837		paf-2	3.48577
stn-2	0		wts-1	2.3837		pak-2	1.7488
sulp-2	0		xpg-1	2.79874		panl-2	2.7488
syx-18	0		Y102A11A.2	1.79874		panl-3	1.7488
syx-2	0		Y104H12D.2	2.53571		paqr-2	2.9712
syx-4	0		Y105C5A.14	0.79874		pas-4	5.41177
T03F7.7	0		Y105C5A.24	0.79874		pash-1	3.16384
T04F3.4	0		Y105C5B.9	0.79874		pbo-1	3.48577
T04F8.6	0		Y105C5B.t2	2.02113		pbrm-1	3.33377
T04H1.5	0		Y105E8A.14	3.02113		pbs-4	4.6874
T05B11.7	0		Y105E8A.32	2.79874		pbs-6	3.48577
T05E11.2	0		Y105E8B.6	0.79874		pcp-3	1.7488
T07D3.9	0		Y106G6D.6	2.02113		pcp-5	3.7488
T07F10.3	0		Y106G6G.2	0.79874		pdk-1	1.7488
T08B1.4	0		Y106G6H.16	2.21378		pdl-1	1.7488
T08B6.4	0		Y106G6H.8	2.3837		pdr-1	4.9712
T08B6.9	0		Y110A2AL.4	1.79874		pept-1	4.16384
T08D2.7	0		Y110A2AM.1	1.21378		pept-2	2.7488
T09B9.4	0		Y110A7A.19	2.3837		pept-3	12.5769
T10B11.8	0		Y110A7A.21	0.79874		pes-4	4.07073
T10E9.1	0		Y110A7A.7	2.53571		pes-9	3.48577
T10E9.3	0		Y111B2A.1	0.79874		pfd-3	4.7488
T11B7.2	0		Y111B2A.25	1.79874		pfd-5	3.33377
T11F8.2	0		Y113G7B.14	0.79874		pgal-1	3.7488
T12E12.3	0		Y116A8C.9	4.12067		pghm-1	1.7488
T13F2.4	0		Y119D3B.14	1.53571		pgp-6	1.7488
T15B7.1	0		Y11D7A.1	0.79874		pgrn-1	1.7488
T16G1.2	0		Y11D7A.7	1.21378		phat-4	3.48577
T19A5.8	0		Y12A6A.1	0.79874		phf-5	3.33377
T19C3.5	0		Y13C8A.1	0.79874		phip-1	2.16384
T19H12.3	0		Y15E3A.5	1.53571		php-3	2.48577
T20B12.3	0		Y17G7B.12	0.79874		pif-1	1.7488
T20D4.10	0		Y17G7B.3	0.79874		pifk-1	1.7488
T20F10.2	0		Y17G7B.8	1.79874		pigv-1	4.41177
T20F7.1	0		Y18H1A.7	2.3837		pik-1	2.7488
T20F7.3	0		Y18H1A.9	0.79874		pir-1	3.33377
T20H12.1	0		Y19D10B.4	2.21378		pkc-3	2.9712
T21B10.4	0		Y20F4.8	1.21378		plk-2	2.7488
T21D11.1	0		Y23H5A.2	1.79874		pme-2	1.7488
T22F7.4	0		Y32B12B.4	2.91422		pmk-3	2.48577
T23B3.1	0		Y34B4A.2	3.30124		pmp-1	1.7488
T24A6.20	0		Y34B4A.4	0.79874		pmp-4	2.16384
T24C4.4	0		Y34B4A.8	2.53571		pmp-5	2.7488
T24E12.5	0		Y34D9A.3	3.02113		pms-2	3.9712
T25G12.3	0		Y34F4.2	0.79874		pnc-1	1.7488
T27E7.1	0		Y34F4.5	3.3837		png-1	2.9712
T28A8.4	0		Y37A1A.2	1.79874		pnk-1	5.07073
T28F2.2	0		Y37A1B.7	1.53571		polk-1	1.7488
T28F3.8	0		Y37E11B.3	2.02113		pop-1	3.33377
tag-120	0		Y37E11B.6	1.21378		pot-1	1.7488
tag-243	0		Y37E3.30	0.79874		ppfr-2	3.48577
tag-276	0		Y37H9A.1	0.79874		pph-5	2.16384
tba-6	0		Y37H9A.2	0.79874		pps-1	1.7488
tdpt-1	0		Y37H9A.3	1.79874		pqm-1	1.7488
tfbm-1	0		Y38A10A.2	0.79874		pqn-15	1.7488
tftc-5	0		Y38C1AA.14	3.91422		pqn-18	2.7488
tmc-2	0		Y38C1AA.7	1.21378		pqn-26	2.7488
trpp-4	0		Y38E10A.20	2.91422		pqn-32	3.86428
trpp-9	0		Y38F1A.8	0.79874		pqn-35	3.33377
tsp-10	0		Y38H6C.20	0.79874		pqn-47	3.16384
tsp-21	0		Y39A1A.14	0.79874		pqn-62	1.7488
tsp-9	0		Y39A1A.3	1.53571		pqn-68	3.33377
ttll-15	0		Y39A1C.1	0.79874		pqn-89	2.16384
ttm-5	0		Y39A3CL.4	1.79874		pqn-94	3.48577
ttr-20	0		Y39A3CR.3	3.30124		pqn-96	1.7488
twk-1	0		Y39B6A.10	0.79874		prdx-3	3.7488
twk-11	0		Y39B6A.16	0.79874		prdx-6	1.7488
twk-43	0		Y39B6A.36	2.53571		prmn-1	2.7488
twk-9	0		Y39B6A.43	2.02113		pro-2	2.16384
tyra-3	0		Y39G8B.2	0.79874		pro-3	3.48577
ubc-19	0		Y39H10B.2	2.3837		prp-17	2.9712
uev-3	0		Y40B1A.2	1.21378		prp-21	3.48577
ugt-24	0		Y40C5A.4	2.67321		prp-3	2.16384
unc-120	0		Y40D12A.2	3.21378		prp-31	3.16384
unc-24	0		Y40H7A.310	3.12067		prx-10	1.7488
unc-93	0		Y41C4A.9	1.79874		prx-12	2.16384
usp-39	0		Y41E3.8	2.3837		prx-14	4.07073
usp-46	0		Y43B11AR.3	0.79874		prx-19	1.7488
ver-3	0		Y43E12A.3	1.79874		pry-1	3.16384
vps-45	0		Y43F11A.6	1.79874		psf-1	2.9712
vps-53	0		Y43F8B.18	1.21378		psr-1	3.16384
vti-1	0		Y44F5A.1	0.79874		ptr-11	2.7488
W01A8.6	0		Y45F10C.4	2.67321		ptr-12	1.7488
W01C8.8	0		Y45F10D.10	0.79874		ptr-17	2.7488
W01F3.2	0		Y45G12B.3	2.53571		ptr-2	4.55616
W01H2.11	0		Y45G5AM.2	4.16797		ptr-20	1.7488
W02D7.6	0		Y45G5AM.3	1.79874		ptr-21	2.9712
W03G9.2	0		Y45G5AM.6	1.21378		ptr-23	4.48577
W03G9.8	0		Y46G5A.35	2.3837		ptr-24	4.2513
W04A4.6	0		Y47D3B.6	3.91422		ptr-4	2.7488
W05F2.7	0		Y47G6A.25	1.79874		pud-4	3.62327
W05H9.2	0		Y47G6A.9	0.79874		puf-10	2.16384
W09G3.7	0		Y48A5A.1	3.02113		puf-12	3.48577
W10C8.6	0		Y48A6B.7	2.91422		pus-1	3.7488
W10D9.3	0		Y48C3A.18	2.91422		pxf-1	3.86428
WBGene00013002	0		Y48E1C.1	2.02113		pyk-2	2.7488
WBGene00165651	0		Y48E1C.2	1.21378		qua-1	1.7488
wrb-1	0		Y48G10A.1	1.21378		R01H10.7	2.7488
xpa-1	0		Y48G10A.2	2.79874		R02D3.3	1.7488
xpg-1	0		Y48G1A.1	0.79874		R02D3.4	2.7488
Y102A5C.36	0		Y48G8AL.10	2.53571		R02E4.3	4.2513
Y102E9.5	0		Y48G8AL.16	2.02113		R02F11.4	2.48577
Y104H12D.2	0		Y48G9A.11	0.79874		R03A10.5	1.7488
Y105C5A.14	0		Y49A3A.3	1.21378		R04F11.3	3.33377
Y105C5A.24	0		Y49E10.21	1.79874		R05C11.4	2.16384
Y105C5A.8	0		Y49F6B.9	3.12067		R05D11.5	2.16384
Y105E8A.21	0		Y4C6A.1	2.02113		R05D7.5	1.7488
Y106G6D.6	0		Y4C6B.1	2.3837		R05F9.9	3.62327
Y106G6H.1	0		Y4C6B.t1	2.21378		R05G9.1	1.7488
Y111B2A.1	0		Y50D4A.5	1.79874		R06A4.2	1.7488
Y111B2A.3	0		Y50D4A.6	0.79874		R06B10.1	2.9712
Y116A8A.10	0		Y50D7A.10	2.21378		R06B9.5	1.7488
Y116A8C.29	0		Y51A2D.21	1.21378		R06F6.12	3.33377
Y119D3B.t1	0		Y51A2D.7	2.91422		R07E3.2	3.33377
Y11D7A.9	0		Y51B9A.5	0.79874		R07E5.7	2.16384
Y17G7B.18	0		Y51H4A.2	0.79874		R07H5.11	2.16384
Y18H1A.7	0		Y51H4A.7	2.53571		R08D7.5	3.7488
Y22D7AL.9	0		Y51H7C.7	3.53571		R09H10.3	3.33377
Y24F12A.1	0		Y52B11A.4	1.21378		R102.5	3.9712
Y24F12A.3	0		Y53C12A.11	2.02113		R105.1	1.7488
Y26E6A.3	0		Y53F4B.14	2.53571		R10D12.13	2.16384
Y32F6B.1	0		Y53F4B.42	2.02113		R10E4.11	3.16384
Y34B4A.10	0		Y53G8B.2	2.02113		R10H10.3	3.7488
Y37F4.1	0		Y54F10BM.3	1.21378		R10H10.7	2.16384
Y37H9A.1	0		Y54F10BM.9	0.79874		R119.1	1.7488
Y38C9A.1	0		Y54G11A.7	0.79874		R119.5	2.7488
Y38F1A.1	0		Y54G2A.21	0.79874		R11A8.1	2.16384
Y39A1A.14	0		Y54G9A.4	0.79874		R11D1.10	2.7488
Y39A3CL.4	0		Y54H5A.1	2.79874		R11D1.3	2.48577
Y43C5A.3	1.93178		Y55B1BR.2	2.3837		R11F4.1	4.91873
Y43F8B.9	1.34682		Y55F3AM.10	0.79874		R12A1.3	2.48577
Y47D3A.14	0.931779		Y55F3AM.5	0.79874		R12C12.5	1.7488
Y48G1A.4	3.04726		Y55F3BR.2	0.79874		R12C12.6	4.2513
Y48G1C.12	2.34682		Y56A3A.11	2.3837		R12C12.7	3.7488
Y49F6B.2	1.34682		Y56A3A.36	1.21378		R12C12.9	2.7488
Y50D4B.3	0.931779		Y56A3A.6	1.53571		R12E2.11	3.16384
Y50D7A.8	1.66874		Y57A10A.2	3.02113		R12G8.t2	2.7488
Y51H4A.25	1.34682		Y57A10A.29	1.21378		R144.12	1.7488
Y53C10A.6	0.931779		Y57G11C.22	0.79874		R144.5	1.7488
Y53G8B.2	1.34682		Y58A7A.1	0.79874		R148.2	2.16384
Y53H1A.2	1.66874		Y59E9AL.4	0.79874		R148.5	1.7488
Y54E10BR.1	1.93178		Y5F2A.4	2.53571		R151.7	1.7488
Y54E10BR.2	0.931779		Y60A3A.21	0.79874		R17.3	1.7488
Y54G2A.73	2.15417		Y61A9LA.1	0.79874		R90.1	3.7488
Y55B1BR.2	0.931779		Y61A9LA.11	1.79874		rab-3	2.48577
Y56A3A.6	0.931779		Y62E10A.20	1.79874		rab-35	3.33377
Y57G11C.8	1.34682		Y64G10A.6	1.79874		rab-6.1	2.7488
Y58A7A.1	1.34682		Y65A5A.t2	1.79874		rabs-5	3.33377
Y60A3A.14	1.34682		Y65B4A.2	2.3837		rad-26	3.9712
Y62E10A.14	0.931779		Y65B4A.8	0.79874		rad-50	1.7488
Y62H9A.3	0.931779		Y65B4BL.7	0.79874		rad-51	1.7488
Y65B4A.1	0.931779		Y66A7A.7	1.79874		rad-8	2.16384
Y65B4A.8	1.93178		Y67D2.6	2.67321		ragc-1	2.16384
Y66D12A.8	1.34682		Y67D8A.10	1.21378		rap-3	1.7488
Y67D8C.9	0.931779		Y67D8C.9	0.79874		ras-2	1.7488
Y71H2AM.2	2.66874		Y67H2A.9	1.21378		rbbp-5	2.48577
Y71H2AM.9	1.34682		Y69A2AL.2	2.21378		rbc-1	3.86428
Y75B8A.32	1.93178		Y69A2AR.31	2.02113		rbc-2	4.2513
Y7A5A.1	0.931779		Y69A2AR.37	0.79874		rbd-1	2.16384
Y80D4G.1	0.931779		Y69A2AR.8	0.79874		rbg-2	1.7488
Y82E9BR.21	0.931779		Y69E1A.2	0.79874		rbpl-1	4.2513
Y92H12BL.4	3.51674		Y69E1A.5	2.02113		rbr-2	4.8077
Y9C2UA.1	2.15417		Y71A12B.10	0.79874		rcn-1	2.7488
ZC116.1	1.93178		Y71A12B.11	1.21378		rde-10	3.62327
ZC123.1	2.51674		Y71G12B.6	1.79874		rde-11	2.16384
ZC434.10	0.931779		Y71H2AM.12	0.79874		rec-8	2.7488
ZK1128.7	1.93178		Y71H2AM.15	0.79874		rep-1	2.16384
ZK430.7	0.931779		Y71H2AR.1	3.3837		repo-1	3.9712
ZK512.4	1.34682		Y71H2B.11	0.79874		rer-1	3.62327
ZK632.5	0.931779		Y73B3A.10	0.79874		rfc-2	3.62327
ZK792.1	0.931779		Y73B3A.4	1.53571		rfc-3	3.33377
ZK899.1	0.931779		Y73B6A.14	0.79874		rfl-1	3.9712
ZK973.9	1.93178		Y73B6BL.44	0.79874		rfs-1	1.7488
ztf-26	0.931779		Y73B6BL.t2	1.79874		rga-1	3.9712
Y43D4A.5	0		Y73C8B.3	0.79874		rgs-2	2.7488
Y43F8B.23	0		Y73C8B.5	0.79874		rha-1	3.48577
Y43F8C.13	0		Y73E7A.3	1.21378		rha-2	2.7488
Y45F10C.4	0		Y73E7A.6	3.02113		rheb-1	4.33377
Y45F10D.6	0		Y75B8A.25	2.3837		rhgf-2	2.16384
Y46G5A.35	0		Y75B8A.6	2.91422		rhi-1	2.48577
Y47D3A.1	0		Y7A5A.1	2.79874		rib-1	3.62327
Y48G1A.1	0		Y7A9A.1	0.79874		ric-8	2.7488
Y4C6B.3	0		Y7A9C.1	0.79874		rict-1	4.2513
Y4C6B.7	0		Y7A9D.1	0.79874		riok-3	3.33377
Y50D4A.5	0		Y82E9BR.23	1.79874		rlbp-1	2.7488
Y51A2D.21	0		Y87G2A.11	3.02113		rme-4	1.7488
Y51F10.4	0		Y87G2A.2	0.79874		rnf-1	3.16384
Y52B11A.10	0		Y87G2A.7	2.91422		rnf-5	3.16384
Y54G2A.36	0		Y94H6A.10	2.02113		rnh-2	2.48577
Y54G2A.40	0		Y94H6A.3	3.12067		rnp-2	4.16384
Y56A3A.30	0		Y95B8A.2	3.73734		rnp-5	3.16384
Y57A10A.6	0		Y95B8A.6	2.53571		rnp-6	4.2513
Y57A10A.7	0		Y95D11A.3	3.3837		rnr-1	4.16384
Y57A10C.9	0		Y97E10AR.3	1.53571		rod-1	4.48577
Y57G11A.2	0		Y9C2UA.1	2.02113		rop-1	2.16384
Y5F2A.4	0		yap-1	1.79874		rpac-19	2.16384
Y67A10A.9	0		zak-1	2.21378		rpac-40	3.33377
Y67D8C.3	0		ZC101.1	0.79874		rpb-11	2.9712
Y69A2AR.37	0		ZC116.1	2.53571		rpb-12	2.9712
Y69E1A.1	0		ZC116.3	1.21378		rpb-4	3.9712
Y71A12B.18	0		ZC123.1	0.79874		rpb-5	3.9712
Y71F9AR.4	0		ZC13.1	2.21378		rpb-9	2.7488
Y73B6BL.31	0		ZC239.16	0.79874		rpia-1	3.48577
Y73E7A.2	0		ZC247.2	2.21378		rpoa-12	2.16384
Y73F8A.1173	0		ZC266.1	0.79874		rpoa-49	2.48577
Y75B8A.13	0		ZC328.2	1.53571		rpt-3	3.16384
Y7A9A.79	0		ZC328.3	2.02113		rsa-2	1.7488
Y7A9C.1	0		ZC434.7	0.79874		rsr-2	2.7488
Y82E9BL.9	0		ZC449.8	0.79874		rsy-1	2.16384
Y82E9BR.23	0		ZC455.1	1.79874		rte-3	4.86428
Y95D11A.1	0		ZC581.3	1.21378		rte-4	2.9712
Y97E10AR.2	0		ZC581.9	0.79874		sacy-1	1.7488
yap-1	0		zig-9	3.21378		saeg-2	1.7488
ZC116.3	0		zim-2	0.79874		sam-10	5.07073
ZC116.5	0		ZK1098.2	3.02113		sams-5	3.48577
ZC13.1	0		ZK1098.4	2.79874		san-1	1.7488
ZC190.16	0		ZK1127.13	1.79874		sars-2	2.16384
ZC239.6	0		ZK1127.5	0.79874		sav-1	3.16384
ZC374.2	0		ZK1127.6	1.21378		sax-1	2.9712
ZC416.2	0		ZK1128.7	1.79874		sax-3	1.7488
ZC449.4	0		ZK1193.2	3.12067		sbds-1	3.16384
ZC513.2	0		ZK1236.1	0.79874		sbp-1	1.7488
ZC581.3	0		ZK1240.2	2.02113		scav-2	4.16384
zip-11	0		ZK1248.11	0.79874		scav-3	2.7488
zip-4	0		ZK1248.15	2.53571		scbp-2	2.48577
ZK1073.2	0		ZK1290.13	2.21378		scc-1	2.9712
ZK1193.2	0		ZK1290.14	2.21378		scc-3	2.9712
ZK1236.1	0		ZK1320.11	1.79874		scl-3	2.9712
ZK1236.5	0		ZK1320.13	2.3837		sco-1	2.16384
ZK1290.5	0		ZK154.1	3.21378		scp-1	1.7488
ZK1307.9	0		ZK154.4	0.79874		scpl-3	2.16384
ZK265.3	0		ZK154.6	2.91422		scrm-8	1.7488
ZK265.7	0		ZK228.3	2.3837		sdpn-1	2.16384
ZK287.4	0		ZK262.t1	2.67321		sdz-24	1.7488
ZK370.6	0		ZK328.4	1.53571		sdz-27	1.7488
ZK546.3	0		ZK430.7	2.02113		sec-10	1.7488
ZK596.1	0		ZK563.5	0.79874		sec-20	1.7488
ZK669.5	0		ZK593.3	0.79874		sec-8	1.7488
ZK678.t3	0		ZK596.1	1.21378		sedl-1	2.7488
ZK742.2	0		ZK6.8	0.79874		sel-1	2.9712
ZK899.2	0		ZK616.3	2.21378		sel-5	3.16384
ZK971.1	0		ZK622.4	1.53571		sel-8	1.7488
ZK973.1	0		ZK643.2	2.02113		sem-4	2.7488
ztf-1	0		ZK673.1	2.53571		set-14	2.16384
ztf-28	0		ZK686.2	0.79874		set-15	2.9712
ztf-3	0		ZK721.4	0.79874		set-2	3.62327
ztf-8	0		ZK742.2	1.53571		set-3	1.7488
acl-1	2.15417		ZK792.1	1.21378		set-31	2.7488
aex-5	0.931779		ZK792.4	0.79874		set-5	1.7488
apn-1	2.34682		ZK792.7	0.79874		set-9	2.16384
aqp-8	0.931779		ZK795.6	0.79874		sfrp-1	1.7488
asp-8	2.80625		ZK858.10	1.21378		sftd-3	3.86428
atg-16.2	2.34682		ZK858.5	2.53571		sfxn-2	2.7488
atln-2	3.34682		ZK863.8	2.67321		sgk-1	2.16384
B0001.4	3.34682		ZK899.1	0.79874		sgo-1	2.16384
B0024.11	1.93178		ZK909.3	2.21378		shc-1	3.62327
B0457.2	0.931779		ZK994.t1	2.02113		shn-1	1.7488
blos-2	0.931779		ztf-13	0.79874		shw-1	1.7488
bra-2	1.34682		ztf-23	2.91422		sid-1	1.7488
C04F5.8	1.34682		ztf-26	1.79874		sin-3	1.7488
C05C12.4	1.93178		ztf-28	1.21378		sinh-1	2.16384
C06A5.6	2.15417		ztf-3	0.79874		sir-2.2	2.7488
C06G4.1	0.931779		ztf-30	0.79874		skih-2	2.7488
C06H5.6	2.80625		21ur-7607	1.21378		skpo-1	2.7488
C09E8.1	2.34682		aakb-1	2.79874		skpo-2	2.16384
C09H10.10	0.931779		aat-9	2.3837		skpt-1	4.41177
C09H10.5	1.34682		abts-4	2.53571		skr-4	2.48577
C10G11.6	1.93178		abu-13	1.21378		slc-17.4	1.7488
C18E9.7	2.66874		acc-4	1.21378		sli-1	1.7488
C18E9.9	2.15417		acy-3	2.02113		slo-1	2.16384
C25G4.2	0.931779		adt-1	1.79874		sma-4	1.7488
C33A12.4	0.931779		age-1	3.12067		sma-5	1.7488
C37H5.3	0.931779		angl-1	2.21378		smc-3	4.55616
C41A3.2	6.50669		anoh-2	0.79874		smc-4	4.07073
C46H3.2	2.15417		arrd-26	2.02113		smc-6	3.48577
C50D2.5	0.931779		avr-14	1.79874		smg-2	3.7488
C51E3.9	2.66874		B0001.4	3.30124		smg-4	1.7488
C53A5.13	0.931779		B0024.11	2.79874		smg-8	2.7488
C56G2.3	0.931779		B0261.1	2.79874		smgl-2	1.7488
cal-2	0.931779		B0273.111	1.79874		smp-2	4.55616
cnc-4	2.15417		B0336.7	0.79874		sms-3	1.7488
col-154	1.66874		B0350.t1	1.21378		smut-1	1.7488
col-74	1.34682		B0432.13	0.79874		smy-8	8.2513
cpsf-4	0.931779		B0432.6	0.79874		snet-1	2.48577
cpt-4	0.931779		B0454.6	1.79874		snf-9	1.7488
cyn-4	2.15417		B0464.6	2.79874		snpc-1.1	3.33377
D2030.7	0.931779		B0464.9	0.79874		snpc-3.4	1.7488
D2096.16	2.15417		B0491.1	2.3837		snr-6	4.86428
ddl-2	2.15417		B0511.6	4.25817		snrp-27	1.7488
dhs-29	0.931779		B0513.5	4.34306		snt-1	3.48577
djr-1.1	0.931779		bath-38	2.53571		snt-4	4.07073
dph-2	2.80625		bcc-1	1.21378		snt-5	1.7488
dpl-1	3.04726		brap-2	0.79874		snx-1	1.7488
DY3.8	2.93178		brc-2	3.21378		snx-14	2.48577
E04F6.9	1.66874		C01A2.2	0.79874		snx-17	2.7488
eaf-1	0.931779		C01C4.3	2.91422		snx-3	2.7488
ech-2	0.931779		C01H6.6	0.79874		soc-2	5.11804
elt-6	1.34682		C02B10.5	3.67321		sod-2	2.7488
exc-9	1.34682		C02D5.2	1.53571		sod-4	2.16384
F01G4.4	1.34682		C02D5.4	1.21378		somi-1	4.6874
F08F3.6	0.931779		C02F5.3	0.79874		sop-2	2.9712
F08G2.5	2.80625		C04B4.2	2.02113		spas-1	3.33377
F09F7.7	0.931779		C04G6.4	2.02113		spat-3	2.16384
F10G7.5	1.93178		C05D11.8	1.79874		spd-3	1.7488
F11C1.1	0.931779		C05D11.9	3.30124		spdl-1	2.16384
F17E9.5	1.34682		C05D2.11	0.79874		spds-1	1.7488
F18E3.12	0.931779		C06A1.2	0.79874		spe-15	2.7488
F22B5.10	2.51674		C06E1.9	1.53571		spin-1	2.16384
F25F6.t1	1.93178		C06E2.1	1.21378		spin-4	1.7488
F25G6.8	0.931779		C06E7.2	1.79874		spl-1	2.7488
F32H5.1	1.66874		C06G1.1	2.53571		spo-11	1.7488
F35G12.11	1.34682		C06G1.5	2.53571		spon-1	1.7488
F49D11.10	0.931779		C07A12.7	2.67321		spp-1	4.6874
F49E2.2	1.93178		C08F11.13	3.02113		spp-16	1.7488
F53F8.4	3.04726		C08G5.7	0.79874		spp-2	2.7488
F54D5.11	2.34682		C09D4.2	1.79874		spp-8	1.7488
F55B11.1	0.931779		C09F9.2	3.12067		spr-1	3.86428
F58A6.1	0.931779		C11H1.3	3.46171		spr-3	1.7488
F58G11.3	2.93178		C13F10.5	3.3837		spr-4	1.7488
F59G1.4	1.66874		C13G5.2	3.21378		spr-5	3.9712
flp-22	2.34682		C14C10.4	2.91422		spsb-2	2.7488
fut-1	0.931779		C14C6.2	3.21378		spt-4	3.16384
glrx-5	1.34682		C14F11.2	0.79874		sptf-3	1.7488
gst-28	1.34682		C15C7.7	0.79874		sptl-3	3.33377
hmbx-1	0.931779		C15H9.11	1.21378		sqt-2	3.48577
hot-8	0.931779		C16A11.2	2.91422		sqv-2	2.9712
idi-1	1.93178		C16C10.1	3.60609		sqv-3	3.33377
ifd-1	0.931779		C23H3.5	0.79874		sqv-6	2.16384
ify-1	2.34682		C23H3.9	0.79874		srd-66	1.7488
JC8.4	1.34682		C24A11.1	0.79874		srf-3	3.62327
K01F9.2	2.15417		C25G4.2	3.02113		srh-2	1.7488
K07H8.8	0.931779		C26B9.3	3.12067		srv-1	1.7488
K09E9.4	2.51674		C26F1.1	3.30124		ssp-16	2.16384
K10D3.10	1.34682		C26F1.3	1.53571		ssp-31	1.7488
K11D9.3	2.51674		C27A12.7	2.02113		sss-1	2.7488
lgc-47	0.931779		C29E4.13	3.46171		stam-1	3.7488
lin-3	0.931779		C29F9.3	0.79874		stau-1	2.16384
lntl-1	0.931779		C29F9.4	2.02113		stc-1	1.7488
lsl-1	0.931779		C31H1.8	3.02113		stim-1	2.7488
M01F1.9	1.66874		C32E12.4	0.79874		sto-4	2.16384
math-27	2.80625		C33A11.2	0.79874		str-176	3.16384
mboa-3	0.931779		C34C12.2	2.67321		strl-1	4.16384
mdf-2	2.51674		C34E10.10	1.79874		such-1	4.48577
mdt-29	0.931779		C34E11.2	2.79874		sul-2	1.7488
mec-15	2.15417		C35D10.8	0.79874		sul-3	3.62327
mig-32	0.931779		C37A5.7	2.02113		sumv-1	3.16384
mir-8191	1.66874		C43E11.9	2.67321		sun-1	3.33377
mre-11	0.931779		C44H9.5	0.79874		sup-35	3.7488
msp-3	1.66874		C45B2.2	3.02113		sur-2	1.7488
ncr-1	0.931779		C47E12.7	2.02113		sur-5	3.33377
ncs-5	1.34682		C47G2.3	0.79874		sut-2	3.62327
ndc-80	0.931779		C48B4.10	1.53571		swan-1	2.9712
neto-1	0.931779		C49A1.10	0.79874		swd-2.1	2.48577
nhr-113	0.931779		C50C3.1	3.46171		swsn-2.2	3.9712
nhr-119	1.66874		C50E3.12	1.53571		swsn-3	4.07073
nhr-37	3.66874		C50F2.3	2.53571		swsn-6	3.33377
nlp-10	2.15417		C52B11.5	2.21378		swsn-7	4.55616
nspd-1	1.34682		C53H9.3	2.67321		swt-1	1.7488
odr-4	1.66874		C56C10.11	2.02113		syp-1	1.7488
pah-1	1.93178		catp-1	3.12067		syp-4	1.7488
pgp-2	1.93178		cbp-2	1.21378		syx-18	1.7488
phf-14	2.66874		CD4.8	1.79874		syx-4	2.16384
plr-1	2.15417		cdc-48.3	2.02113		syx-7	2.9712
pme-1	1.93178		cdc-6	2.21378		szy-20	1.7488
pmk-1	1.34682		cdf-2	2.21378		T01B11.2	5.2513
prp-31	1.93178		cec-2	2.3837		T01C3.11	1.7488
R01B10.4	1.34682		ceh-49	0.79874		T01C3.2	3.7488
R02F2.9	0.931779		cgr-1	2.79874		T01C3.3	4.91873
R04F11.3	0.931779		che-10	2.3837		T01C3.9	3.62327
R05D3.8	0.931779		chtl-1	2.91422		T01C8.2	1.7488
R07E3.6	0.931779		cki-1	1.79874		T01D3.5	1.7488
R102.2	1.66874		ckk-1	2.3837		T01D3.6	1.7488
R11G1.6	0.931779		clec-222	0.79874		T01G1.4	4.2513
R74.2	0.931779		clec-65	3.73734		T01H3.3	3.33377
rhgf-2	2.15417		clec-66	0.79874		T02B5.3	2.7488
rme-6	0.931779		clec-72	2.02113		T02D1.8	2.16384
scd-2	1.93178		clec-85	1.53571		T02E1.2	1.7488
scl-5	2.66874		clk-1	0.79874		T03D8.6	1.7488
set-22	1.66874		clp-4	2.53571		T03E6.8	1.7488
set-24	0.931779		cnc-4	2.21378		T03F1.11	2.16384
sid-3	2.15417		cnp-2	0.79874		T03F1.12	3.62327
skat-1	0.931779		coh-3	0.79874		T03F6.4	2.7488
skpt-1	1.34682		col-111	0.79874		T03G11.6	1.7488
snpc-3.2	0.931779		col-120	2.21378		T04A8.8	4.41177
snrp-27	0.931779		col-146	3.12067		T04C12.11	1.7488
sph-1	1.66874		col-155	1.79874		T04C12.8	2.16384
suf-1	2.66874		col-76	2.3837		T04C9.1	5.65569
T01D3.1	0.931779		cpb-1	1.53571		T04D3.t1	3.16384
T02B11.4	0.931779		cpt-4	1.79874		T04F3.4	2.7488
T02E1.2	0.931779		cTel55X.1	1.79874		T04F8.3	1.7488
T05H4.11	3.25371		cyd-1	0.79874		T04F8.t1	1.7488
T06F4.1	2.80625		cyp-42A1	0.79874		T05A12.4	1.7488
T09B9.10	1.66874		D1014.4	2.53571		T05B11.1	2.48577
T10B10.3	0.931779		D1043.1	3.21378		T05C3.6	1.7488
T20B3.1	3.73913		D1069.3	3.12067		T05E12.3	1.7488
T26G10.1	0.931779		D2023.6	3.21378		T05G5.1	2.7488
tag-77	0.931779		D2096.16	1.21378		T05G5.5	2.16384
tir-1	1.34682		D2096.7	0.79874		T05H4.10	3.48577
toc-1	2.66874		daf-1	3.3837		T06A10.107	1.7488
ttr-50	0.931779		daf-28	0.79874		T06A10.3	3.48577
twk-40	2.15417		dap-3	2.53571		T06A4.3	1.7488
ucr-2.3	1.93178		dbl-1	2.91422		T06D8.3	9.28538
ugt-36	0.931779		dct-11	2.02113		T06E4.12	3.33377
W02B12.10	1.93178		ddo-3	1.21378		T06E4.14	2.48577
W04A8.4	1.34682		ddx-23	3.79874		T06E4.9	1.7488
W07B8.3	2.66874		dgn-1	3.79874		T06E6.10	1.7488
W07G4.5	1.34682		dhhc-2	2.3837		T06F4.1	2.16384
W09C5.7	1.34682		dhp-2	0.79874		T06G6.6	1.7488
Y119C1B.5	2.66874		dhrs-4	3.12067		T07A5.1	3.48577
Y17G9B.8	1.66874		dnj-10	3.30124		T07C12.12	1.7488
Y37E11B.1	1.34682		dnj-4	1.79874		T07D10.8	1.7488
Y37E11B.2	0.931779		dop-1	0.79874		T07D3.9	2.7488
Y40D12A.1	1.93178		doxa-1	1.21378		T07D4.5	1.7488
Y42A5A.1	0.931779		dpf-6	2.3837		T07F10.1	1.7488
acdh-2	0		dph-1	0.79874		T07F10.3	2.16384
alh-10	0		dpy-14	3.02113		T07F12.2	2.16384
apc-11	0		drsh-1	2.02113		T08A11.1	2.7488
arx-7	0		dylt-1	3.30124		T08A11.2	3.9712
asp-11	0		E01A2.5	1.21378		T08B2.12	1.7488
ast-1	0		E01B7.2	3.02113		T08G11.4	3.16384
B0019.2	0		E02H1.2	0.79874		T08G3.4	1.7488
B0491.1	0		ebax-1	2.3837		T08H10.1	4.2513
bag-1	0		ech-2	3.21378		T09A5.7	3.16384
bath-28	0		efl-2	1.21378		T09B4.7	1.7488
bir-2	0		egal-1	3.12067		T09B4.9	4.41177
bli-3	0		egl-19	4.91422		T09B9.10	3.33377
bra-1	0		egl-20	3.02113		T09B9.3	3.33377
C01F1.5	0		emc-3	3.3837		T09E11.11	1.7488
C03A7.13	0		exc-5	2.02113		T09F5.12	1.7488
C05A9.2	0		F07E5.5	2.02113		T10B10.3	1.7488
C05D12.3	0		F07H5.10	1.79874		T10B10.4	4.9712
C05D12.4	0		F08A8.2	0.79874		T10B11.2	3.48577
C06G1.6	0		F08G12.2	1.79874		T10B11.6	1.7488
C08G5.7	0		F09E5.2	2.21378		T10B5.3	4.55616
C10C5.3	0		F10B5.8	2.53571		T10B5.4	2.9712
C14B4.2	0		F10C1.9	2.21378		T10C6.10	1.7488
C14F11.14	0		F10E7.6	0.79874		T10C6.5	2.9712
C15C7.7	0		F10F2.2	1.79874		T10C6.6	2.16384
C15H9.11	0		F13B12.3	0.79874		T10D4.6	3.48577
C17D12.t3	0		F13H10.6	2.21378		T10E9.1	2.16384
C18A3.9	0		F14D12.1	1.79874		T10E9.2	3.62327
C18H7.1	0		F17A9.5	2.3837		T10E9.4	2.9712
C25E10.12	0		F17C11.10	3.46171		T10G3.1	1.7488
C25F9.10	0		F17C11.11	1.21378		T10H10.2	2.7488
C26B2.7	0		F17E9.4	2.79874		T11B7.5	1.7488
C29A12.1	0		F18A11.3	0.79874		T11G6.2	1.7488
[truncated: 6,940 more rows]
