# Supplementary material for: Eukaryotic initiation factor EIF-3.G augments mRNA translation efficiency to regulate neuronal activity
Source: eLife. 2021 Jul 29;10:e68336. doi: 10.7554/eLife.68336 (PMC8354637; doi:10.7554/eLife.68336)
Supplement: Figure 4—figure supplement 2—source data 1. — Number of EIF-3.G target genes exhibiting trans-splicing. [file elife-68336-fig4-figsupp2-data1.xlsx]

## Sheet: Figure 4- figure supplement 2A
	# of genes	proportion
# not annotated	35	0.155556
# trans-spliced	133	0.591111
# not trans-spliced	57	0.253333
Total	225
