# Supplementary material for: Eukaryotic initiation factor EIF-3.G augments mRNA translation efficiency to regulate neuronal activity
Source: eLife. 2021 Jul 29;10:e68336. doi: 10.7554/eLife.68336 (PMC8354637; doi:10.7554/eLife.68336)
Supplement: Figure 4—figure supplement 2—source data 2. — Length of 5’UTRs among trans-spliced or non-trans-spliced mRNAs expressed in the C. elegans transcriptome or EIF-3.G target mRNAs. [file elife-68336-fig4-figsupp2-data2.xlsx]

## Sheet: Figure 4- figure supplement 2B
WS271 non-trans-spliced (n=5,970)	EIF3G non-trans-spliced (n= 57)	WS271 trans-spliced (n=6,674)	eif3G_targets_transspliced (n=133)
10	139	1246	29
16	425	629	27
80	41	529	31
16	84	492	15
95	502	490	80
85	13	482	98
31	84	480	17
568	93	453	36
11	71	453	48
83	74	445	214
58	213	439	81
144	354	437	11
136	50	433	20
162	21	430	44
36	96	429	20
74	103	415	13
116	229	406	93
23	193	403	27
91	94	400	15
44	10	392	46
95	252	385	91
22	10	376	74
23	529	376	137
123	44	376	37
48	34	374	155
16	91	374	224
24	15	370	69
14	22	367	28
114	18	361	211
135	152	358	11
418	418	356	160
50	18	355	43
17	405	355	17
26	27	342	60
405	374	339	81
51	482	338	96
36	306	336	17
33	1081	317	31
88	37	313	86
122	76	313	129
482	158	311	128
311	44	310	30
495	87	310	12
150	42	306	26
12	118	304	26
1635	118	303	36
85	241	302	30
60	70	298	28
92	274	298	175
13	519	298	16
33	177	296	17
136	413	293	72
53	34	293	25
502	11	292	44
81	11	292	13
570	31	291	140
15	44	289	15
121		288	29
35		286	19
80		286	23
62		286	24
70		285	41
16		283	46
35		281	66
126		281	24
52		276	17
138		275	40
155		273	129
87		273	13
268		273	228
12		273	19
37		272	26
22		272	13
16		272	40
38		272	56
127		272	92
10		272	63
181		272	54
130		271	20
37		270	35
99		269	123
405		269	139
188		268	191
121		268	16
51		267	191
292		266	53
62		266	89
78		265	10
17		264	45
326		264	79
71		263	177
217		262	140
376		262	63
29		256	13
14		256	35
309		255	22
82		254	23
25		253	17
334		252	177
34		251	32
10		250	28
144		249	24
42		248	116
13		247	51
57		247	62
152		246	29
22		244	32
51		242	70
427		242	169
82		241	78
326		241	12
103		240	17
160		239	119
77		238	32
158		238	253
102		236	16
83		235	152
1161		234	91
244		234	52
104		231	39
25		231	102
555		231	65
168		231	154
44		230	131
58		230	122
703		228	64
145		227	51
312		227	86
16		227	21
193		227	21
17		226	53
12		226	19
75		225	37
63		225
27		225
137		224
12		224
85		224
159		224
43		224
34		221
53		221
21		220
36		220
37		220
154		219
34		219
51		218
84		218
78		218
143		218
28		217
184		217
208		217
48		216
18		216
171		215
83		215
264		214
25		214
109		214
51		214
30		214
402		214
4639		212
76		212
122		212
123		211
194		211
49		211
117		211
176		211
10		211
84		210
384		210
37		210
80		209
140		208
113		208
96		208
205		208
81		207
129		206
179		206
77		206
76		206
60		205
42		204
10		204
23		203
147		203
170		203
89		203
103		202
28		201
42		201
10		200
97		200
61		199
20		199
56		199
21		198
14		198
76		198
317		197
61		197
115		197
81		196
117		196
99		196
66		195
57		195
97		195
43		194
61		194
106		194
61		194
28		194
71		194
39		193
165		193
32		193
10		193
163		193
33		192
61		192
141		191
159		191
47		191
97		191
91		190
27		190
114		190
31		190
17		190
118		189
62		188
108		188
37		187
257		187
31		187
14		187
39		185
80		184
162		184
21		184
22		183
11		183
51		183
82		183
77		183
70		182
22		182
46		182
77		181
118		181
207		181
37		181
20		180
459		179
147		179
118		179
43		179
110		178
13		178
234		178
88		178
23		177
114		177
544		177
358		177
14		176
233		176
79		176
111		176
102		176
20		176
238		175
75		175
39		175
226		175
477		175
60		175
166		175
227		174
78		174
16		173
45		173
46		173
63		172
60		172
100		172
92		172
112		172
41		171
140		171
447		171
16		171
34		170
53		170
55		170
28		169
18		169
39		169
440		168
15		168
150		168
40		168
47		167
27		167
137		167
113		167
70		166
72		166
51		166
76		166
40		166
24		165
25		165
331		164
67		164
73		164
117		164
60		164
34		164
78		164
239		164
146		164
83		164
153		164
96		163
51		163
170		162
19		162
21		161
53		161
16		161
116		161
30		161
552		161
83		161
147		161
98		160
28		160
71		160
187		160
75		159
595		159
10		159
301		158
233		158
96		158
13		158
131		158
84		157
101		157
35		157
39		157
140		157
73		157
106		156
43		156
88		156
30		156
129		156
64		156
96		156
124		155
62		155
14		155
19		155
240		155
99		155
108		155
117		154
13		154
85		154
10		154
157		154
10		153
170		153
36		153
42		153
11		153
92		153
25		152
154		152
61		152
83		152
239		152
168		151
52		151
109		151
14		151
68		151
84		151
544		151
26		150
80		150
74		150
194		150
90		150
11		150
41		150
15		150
284		149
74		149
10		149
30		149
918		149
79		149
581		149
362		148
15		148
36		148
32		147
175		147
16		147
46		147
241		147
26		147
354		147
385		147
358		147
108		147
25		146
42		146
108		146
470		146
203		146
11		146
129		146
26		145
47		145
39		145
87		145
90		145
34		145
45		144
37		144
22		144
38		144
44		144
38		144
15		143
31		143
103		143
454		143
12		143
15		143
73		143
150		143
26		142
80		142
18		142
32		142
159		142
285		142
339		142
91		141
85		141
41		140
73		140
57		140
105		140
52		140
112		140
104		140
111		140
84		140
14		139
77		139
256		139
14		139
14		139
35		139
212		138
121		138
36		138
91		138
67		138
70		138
63		138
26		138
21		138
144		138
49		138
130		138
23		138
23		137
21		137
92		137
273		137
95		137
51		137
94		137
27		137
70		137
67		137
56		137
135		137
47		136
49		136
342		136
38		136
104		136
55		136
21		135
130		135
42		135
80		135
102		135
56		135
11		135
75		135
86		135
452		135
80		134
51		134
19		134
74		134
13		134
13		134
34		134
33		133
100		133
101		133
235		133
80		133
49		132
182		132
203		132
12		132
106		132
12		132
65		132
97		132
75		132
80		132
114		132
32		131
109		131
298		131
141		131
149		131
53		131
96		131
557		131
95		131
16		130
225		130
10180		130
77		130
125		130
27		130
77		130
76		130
39		130
97		130
79		129
127		129
105		129
149		129
147		129
492		129
112		129
64		129
142		128
37		128
106		128
41		128
22		128
39		128
60		128
58		128
79		128
23		128
47		128
19		127
40		127
48		127
90		127
558		127
13		127
34		127
84		127
287		126
127		126
60		126
36		126
213		126
68		126
75		126
93		126
34		126
33		126
10		126
29		125
246		125
19		125
92		125
16		125
44		125
58		125
16		125
79		125
356		124
482		124
22		124
44		123
16		123
13		123
92		123
12		123
208		123
13		123
59		123
53		123
126		122
52		122
31		122
42		122
33		122
66		122
82		122
50		122
150		122
12		122
182		121
89		121
146		121
68		121
97		121
20		121
28		121
113		120
73		120
214		120
96		120
44		120
135		120
14		120
47		120
34		120
115		120
18		120
17		120
10		120
78		120
31		119
42		119
26		119
74		119
242		119
76		119
14		119
141		119
98		119
77		119
44		119
97		119
44		119
28		118
11		118
11		118
73		118
206		118
100		118
80		118
63		118
289		117
57		117
27		117
80		117
107		117
15		117
71		117
23		117
142		117
103		117
14		117
33		117
147		116
68		116
277		116
110		116
89		116
95		116
56		116
120		116
13		116
81		116
94		116
204		116
84		116
23		116
117		115
45		115
64		115
23		115
160		115
30		115
153		115
194		114
180		114
21		114
153		114
780		114
13		114
416		114
204		114
166		114
29		114
58		114
76		114
51		114
522		114
548		114
440		114
15		114
42		113
45		113
37		113
56		113
101		113
19		112
68		112
60		112
71		112
38		112
67		112
44		112
61		112
145		112
107		112
231		112
25		112
534		112
86		112
59		112
12		112
73		112
56		111
135		111
162		111
70		111
113		111
37		110
79		110
131		110
16		110
136		110
93		110
18		110
37		110
204		110
26		110
32		109
38		109
72		109
61		109
73		109
143		109
62		109
27		109
146		109
282		109
59		109
14		108
31		108
103		108
32		108
200		108
153		108
18		108
1829		108
44		108
914		108
13		108
205		108
88		108
14		107
23		107
184		107
37		107
105		107
35		107
155		107
106		107
50		107
132		107
47		107
34		107
45		106
72		106
45		106
99		106
26		106
185		106
187		106
103		106
26		106
13		106
98		106
25		105
134		105
40		105
465		105
34		105
54		105
29		105
35		104
16		104
43		104
35		104
10		104
129		104
154		104
420		104
74		104
36		104
85		104
14		104
36		104
49		104
162		104
76		103
48		103
54		103
53		103
183		103
20		103
16		103
33		103
80		103
105		103
33		103
212		102
67		102
100		102
13		102
168		102
52		102
51		102
48		102
73		102
38		102
37		102
86		102
59		102
23		102
34		101
65		101
65		101
203		101
11		101
14		101
62		101
82		101
31		101
111		101
55		100
85		100
44		100
36		100
89		100
55		100
120		100
184		100
123		100
97		100
53		100
37		99
63		99
244		99
127		99
168		99
306		99
41		99
269		99
23		99
48		99
72		99
3354		99
86		99
41		99
35		99
69		99
20		98
64		98
739		98
107		98
386		98
139		98
27		98
63		98
150		98
232		98
109		98
152		98
19		98
14		97
19		97
19		97
90		97
17		97
35		97
21		97
20		97
59		97
11		97
240		96
95		96
68		96
75		96
62		96
251		96
97		96
272		96
194		96
25		96
35		96
102		96
163		96
13		96
16		96
122		96
107		96
45		96
59		96
13		95
75		95
58		95
54		95
95		95
146		95
21		95
22		95
24		95
307		95
56		95
14		95
150		95
83		95
52		95
68		95
120		95
98		95
54		95
10		95
21		95
12		95
30		95
34		94
65		94
86		94
15		94
71		94
148		94
17		94
47		94
18		94
35		94
218		94
31		94
154		94
85		94
17		94
20		93
13		93
174		93
141		93
128		93
204		93
34		93
33		93
33		93
33		93
33		93
33		93
11		93
33		93
35		93
16		93
40		93
266		93
44		93
55		92
236		92
405		92
27		92
100		92
55		92
39		92
91		92
13		92
101		92
382		91
53		91
441		91
294		91
94		91
17		91
149		91
24		91
56		91
75		91
28		91
64		91
20		91
12		91
91		91
56		91
173		91
30		90
102		90
92		90
10		90
120		90
207		90
24		90
36		90
30		90
14		90
11		89
46		89
352		89
123		89
392		89
197		89
265		89
442		89
14		89
31		89
86		89
453		89
69		89
42		89
113		88
45		88
39		88
84		88
64		88
40		88
409		88
45		88
10		88
118		88
270		88
79		88
92		88
109		88
37		88
83		88
268		88
91		88
26		87
163		87
35		87
130		87
61		87
37		87
80		87
123		87
40		87
57		87
44		87
53		87
73		87
57		87
16		87
56		86
342		86
35		86
27		86
66		86
13		86
305		86
81		86
26		86
71		86
22		86
268		86
34		86
67		86
120		85
502		85
320		85
55		85
96		85
150		85
551		85
11		85
107		85
469		85
79		85
71		84
75		84
32		84
11		84
17		84
129		84
154		84
123		84
134		84
34		84
14		84
465		84
79		84
71		84
118		84
147		84
64		84
299		84
44		83
78		83
110		83
136		83
18		83
25		83
18		83
75		83
57		83
21		83
50		83
138		83
188		83
428		83
46		82
525		82
111		82
82		82
67		82
108		82
111		82
15		82
67		82
20		82
34		82
20		82
96		82
72		82
85		82
79		82
27		82
11		82
37		81
84		81
24		81
44		81
47		81
212		81
24		81
45		81
32		81
64		81
64		81
21		81
62		81
56		81
119		81
57		81
99		81
107		80
44		80
70		80
21		80
89		80
284		80
10		80
102		80
27		80
107		80
91		80
103		80
88		80
339		80
15		80
21		79
80		79
61		79
161		79
132		79
53		79
472		79
90		79
19		79
131		79
30		79
47		79
87		79
77		79
251		79
31		79
10		79
39		79
11		79
48		79
31		79
66		79
85		79
81		79
284		79
39		79
26		79
109		79
53		78
23		78
48		78
25		78
78		78
58		78
124		78
499		78
12		78
59		78
20		78
106		78
440		78
11		78
21		78
36		78
31		78
46		78
24		77
22		77
12		77
44		77
60		77
45		77
79		77
23		77
12		77
130		77
69		77
148		77
24		77
65		77
61		77
24		77
30		77
17		77
25		77
168		77
149		77
65		77
45		76
14		76
268		76
106		76
71		76
89		76
96		76
51		76
148		76
365		76
266		76
63		76
28		76
14		76
65		76
234		76
14		76
66		76
227		76
35		75
187		75
122		75
287		75
96		75
16		75
77		75
176		75
48		75
25		75
43		75
101		75
11		75
23		75
565		75
19		75
68		75
130		75
244		75
19		75
118		74
167		74
45		74
105		74
60		74
120		74
393		74
91		74
40		74
121		74
12		74
29		74
274		74
336		74
25		74
19		74
36		74
84		74
65		74
165		74
61		74
32		74
505		74
47		73
51		73
314		73
54		73
58		73
56		73
44		73
43		73
29		73
63		73
44		73
38		73
92		73
490		73
25		73
10		73
56		73
63		73
48		73
14		72
72		72
70		72
41		72
63		72
151		72
134		72
78		72
65		72
177		72
64		72
22		72
48		72
140		72
17		72
10		72
41		72
73		72
63		72
415		72
29		72
37		72
83		72
67		72
72		72
29		72
29		72
43		72
19		72
84		71
80		71
51		71
62		71
166		71
88		71
158		71
39		71
10		71
67		71
92		71
81		71
14		71
544		71
63		71
14		71
31		71
12		71
45		71
20		71
19		71
104		71
138		71
101		71
354		70
149		70
32		70
33		70
364		70
17		70
13		70
115		70
192		70
39		70
509		70
81		70
22		70
43		70
162		70
125		70
72		70
12		70
537		70
923		70
49		70
138		70
289		70
82		70
35		70
101		70
227		70
67		70
55		70
21		70
50		69
55		69
14		69
15		69
85		69
195		69
81		69
2255		69
139		69
522		69
41		69
176		69
55		69
26		69
54		69
16		69
90		69
85		69
101		69
135		69
323		69
130		69
13		69
23		69
29		69
56		69
101		69
197		69
195		68
20		68
212		68
42		68
185		68
84		68
13		68
36		68
14		68
12		68
56		68
90		68
174		68
74		68
95		68
61		68
22		68
100		68
11		68
53		68
83		68
52		68
51		68
12		67
95		67
119		67
18		67
199		67
10		67
35		67
18		67
34		67
128		67
12		67
699		67
42		67
77		67
65		67
68		67
11		67
47		67
426		67
226		67
13		67
107		67
420		67
37		67
74		67
47		67
71		66
43		66
31		66
93		66
520		66
28		66
28		66
61		66
15		66
51		66
199		66
17		66
273		66
19		66
38		66
290		66
11		66
114		66
41		66
10		66
25		66
21		66
37		66
90		66
211		66
51		66
31		66
134		66
50		66
50		66
106		65
377		65
490		65
52		65
364		65
97		65
19		65
484		65
314		65
11		65
169		65
68		65
195		65
83		65
41		65
33		65
66		65
139		65
12		65
150		65
94		65
17		65
47		65
90		65
64		65
56		65
143		65
51		65
95		65
13		65
81		65
52		64
253		64
41		64
446		64
294		64
19		64
122		64
27		64
1073		64
44		64
116		64
26		64
438		64
65		64
190		64
20		64
555		64
34		64
32		64
12		64
57		64
54		64
211		64
98		64
16		64
25		64
120		64
19		64
73		64
239		64
265		64
13		64
45		64
190		64
26		63
99		63
157		63
13		63
12		63
28		63
68		63
29		63
82		63
196		63
73		63
323		63
166		63
43		63
26		63
26		63
771		63
21		63
52		63
13		63
187		63
53		63
376		63
12		63
56		63
40		63
134		63
49		63
113		63
20		63
27		63
38		63
60		63
55		63
603		63
440		63
125		62
37		62
48		62
95		62
153		62
1278		62
554		62
17		62
63		62
225		62
267		62
59		62
10		62
35		62
17		62
77		62
27		62
51		62
363		62
55		62
115		62
32		62
199		62
161		62
695		62
997		62
13		62
87		62
43		61
10		61
24		61
127		61
387		61
75		61
226		61
18		61
12		61
66		61
28		61
35		61
26		61
28		61
27		61
79		61
60		61
117		61
297		61
234		61
42		61
154		61
34		61
707		61
82		61
150		61
11		61
14		61
518		61
91		61
27		61
158		61
10		61
78		61
24		61
78		61
42		61
94		61
11		61
121		61
26		61
660		61
16		61
178		61
34		61
53		61
47		60
45		60
55		60
43		60
211		60
89		60
117		60
661		60
34		60
441		60
286		60
584		60
22		60
78		60
112		60
617		60
102		60
38		60
221		60
20		60
172		60
94		60
55		60
24		60
37		60
33		60
100		60
542		60
396		60
97		60
230		60
43		60
82		59
186		59
332		59
73		59
27		59
191		59
118		59
53		59
15		59
47		59
99		59
142		59
86		59
21		59
23		59
356		59
128		59
22		59
27		59
12		59
87		59
105		58
22		58
74		58
229		58
51		58
48		58
25		58
88		58
131		58
1177		58
175		58
35		58
751		58
31		58
64		58
87		58
12		58
26		58
102		58
273		58
610		57
182		57
83		57
19		57
116		57
137		57
31		57
207		57
46		57
112		57
19		57
387		57
76		57
22		57
64		57
18		57
67		57
20		57
86		57
37		57
22		57
16		57
36		57
14		57
92		57
119		57
13		57
52		57
205		57
179		57
12		57
18		57
74		57
18		57
38		57
33		57
21		57
82		57
22		57
40		57
59		57
37		57
86		57
42		57
164		57
88		57
12		57
62		57
46		57
336		56
93		56
125		56
73		56
26		56
18		56
113		56
118		56
31		56
14		56
331		56
19		56
135		56
254		56
15		56
16		56
147		56
64		56
23		56
269		56
61		56
62		56
580		56
15		56
71		56
373		56
85		56
50		56
61		56
344		56
19		56
249		56
400		56
22		56
259		55
153		55
26		55
99		55
259		55
101		55
109		55
236		55
107		55
402		55
335		55
25		55
21		55
32		55
81		55
18		55
71		55
76		55
271		55
236		55
63		55
39		55
42		55
33		55
30		55
33		55
154		55
12		55
161		55
15		55
49		55
85		55
140		55
321		55
76		55
81		55
117		55
122		55
1467		55
27		55
41		55
43		55
59		55
99		54
199		54
1498		54
37		54
63		54
63		54
51		54
34		54
26		54
24		54
42		54
124		54
84		54
25		54
21		54
59		54
18		54
63		54
290		54
109		54
301		54
358		54
138		54
300		54
434		54
26		54
46		54
43		54
80		54
150		54
35		54
26		54
166		54
11		54
38		54
371		54
99		54
26		54
1300		54
31		54
61		54
52		54
13		54
30		54
98		54
88		54
268		53
10		53
16		53
83		53
107		53
19		53
66		53
73		53
36		53
64		53
83		53
400		53
465		53
34		53
371		53
104		53
82		53
70		53
99		53
41		53
84		53
68		53
66		53
58		53
37		53
112		53
75		53
13		53
13		53
36		53
43		53
37		53
57		53
28		53
127		53
1656		53
185		53
20		53
82		53
82		53
11		53
34		53
12		53
53		53
247		53
335		53
187		53
39		53
19		53
121		52
140		52
49		52
276		52
260		52
70		52
10		52
22		52
15		52
36		52
12		52
93		52
73		52
[truncated: 4,675 more rows]
