# Supplementary material for: Eukaryotic initiation factor EIF-3.G augments mRNA translation efficiency to regulate neuronal activity
Source: eLife. 2021 Jul 29;10:e68336. doi: 10.7554/eLife.68336 (PMC8354637; doi:10.7554/eLife.68336)
Supplement: Figure 4—figure supplement 2—source data 3. — Percent GC in 10nt bins up to 150nt from the start codon for each indicated gene. [file elife-68336-fig4-figsupp2-data3.xlsx]

## Sheet: Figure 4- figure supplement 2C
gene	150	140	130	120	110	100	90	80	70	60	50	40	30	20	10
F53F10.2	50	40	40	50	60	70	40	30	30	40	70	30	30	10	50
SUR-7	50	60	40	40	50	30	40	30	50	60	20	30	30	40	10
MCA-1	80	70	70	40	50	40	40	50	30	60	40	50	60	70	50
Y54G2A.10	40	60	20	20	70	60	40	30	30	40	20	30	0	30	30
GSA-1	80	50	40	70	60	30	60	60	60	50	40	50	50	50	50
F31F7.1	40	50	40	60	70	40	60	50	50	50	30	40	40	40	30
SMD-1	60	50	40	90	60	60	50	60	30	60	60	40	50	60	40
HRP-1	50	50	30	50	30	50	50	30	30	30	10	10	10	50	60
C03H5.6	60	70	70	70	70	50	60	60	60	50	40	50	20	50	40
LFI-1	90	30	30	70	50	30	70	60	70	30	20	40	40	60	40
ENPL-1	30	70	70	70	30	60	40	60	20	50	60	40	40	50	40
UNC-43	10	70	70	20	70	50	60	20	50	50	60	50	30	40	30
PDF-1	60	70	60	60	40	80	30	40	30	30	40	20	40	20	30
Y39E4B.6	50	50	50	60	90	60	60	70	50	40	50	90	60	60	20
TTR-24	50	70	60	40	40	60	50	30	50	20	40	60	60	20	40
KIN-10	60	80	60	60	60	70	60	50	30	50	50	20	20	30	30
RAD-23	40	20	10	20	30	20	40	10	10	20	0	30	20	20	20
MOAG-4	50	40	40	60	80	60	70	50	30	20	30	30	60	70	30
FLP-18	60	40	30	30	40	50	50	40	40	0	30	40	50	20	50
UAF-1	60	40	30	30	60	70	50	50	60	40	40	30	30	60	40
LRON-3	30	40	20	60	30	30	50	60	60	40	50	40	60	60	20
Y55B1BL.1	30	10	50	60	20	50	60	50	70	50	40	20	40	40	50
EGL-30	30	40	50	50	70	40	70	80	50	60	40	10	40	60	30
NHR-97	10	30	10	20	40	60	20	20	30	20	30	20	40	30	20
EGL-3	60	50	50	70	20	40	40	60	70	50	40	50	30	50	20
SAX-7	50	50	40	70	40	30	30	70	60	70	20	50	60	30	70
C08G9.1	30	70	40	10	60	50	50	60	60	20	30	50	40	50	30
LEC-2	50	60	40	30	50	70	70	60	50	40	90	50	50	40	40
NLP-40	50	50	40	60	60	50	70	70	60	60	40	40	30	30	30
T16A9.3	30	20	10	60	10	60	60	20	50	30	20	30	10	30	20
LBP-2	20	40	70	50	30	40	60	20	80	60	20	50	30	10	50
R11F4.1	0	30	30	50	30	30	40	30	40	50	30	50	10	10	20
FLP-9	20	50	60	40	50	50	30	60	80	50	50	60	60	50	40
COL-17	60	30	40	40	60	50	50	50	50	60	30	60	50	40	50
MAK-1	60	40	30	30	20	50	40	30	30	30	60	50	40	60	20
FUM-1	50	70	70	20	70	60	40	50	40	50	70	30	80	50	80
ZIP-2	50	30	30	50	50	40	50	80	40	40	30	40	70	60	70
Y54G2A.36	50	40	10	40	30	40	50	30	50	60	60	40	40	70	40
CPZ-1	50	40	50	40	60	30	60	60	40	20	50	50	30	60	80
SEC-61	40	30	30	30	0	40	40	30	10	60	60	30	80	70	60
DHC-1	60	30	50	30	50	60	40	40	30	50	30	40	40	60	60
SPSB-1	20	70	40	40	20	30	30	20	50	50	50	80	70	50	50
RPS-20	10	40	10	50	30	10	40	40	50	30	50	50	60	50	50
MTHF-1	50	40	30	40	20	40	40	30	30	40	50	60	40	30	60
ELL-1	60	70	50	50	30	40	40	40	40	50	50	50	80	40	50
PAB-2	40	30	70	30	70	20	60	50	60	80	70	60	70	50	40
NUO-3	40	70	30	50	60	40	50	40	50	80	80	40	60	70	60
T28B8.1	30	40	10	40	20	30	40	40	50	40	50	30	60	50	60
TAX-6	50	50	50	70	40	40	40	40	70	50	50	50	80	40	60
ZK856.7	40	50	20	10	10	30	30	30	20	30	30	30	40	50	70
NDUF-7	40	50	30	40	50	70	30	10	50	50	40	30	70	40	70
MNK-1	30	30	40	50	30	50	40	60	30	50	60	50	50	50	60
LET-607	50	40	50	40	10	40	10	30	40	70	40	80	50	40	50
PAB-1	30	30	20	40	40	70	50	40	40	50	40	60	70	70	40
UNC-52	50	50	40	50	30	40	60	40	50	60	40	70	40	60	70
C34B4.2	60	60	40	60	50	50	50	40	50	40	60	40	50	80	50
PMT-2	30	40	40	50	30	70	30	30	50	40	30	50	40	70	60
XBP-1	50	60	10	30	40	50	50	50	20	60	50	80	80	70	40
ELO-1	20	50	40	60	50	50	50	50	30	60	60	60	50	30	50
ALY-3	40	40	20	20	40	30	20	40	40	10	0	50	40	50	50
SRAP-1	30	60	50	50	20	30	50	50	70	60	30	70	80	50	40
FAT-3	40	60	30	40	40	20	50	50	40	50	50	40	50	30	10
PCK-1	30	20	30	20	10	30	40	30	30	30	30	40	30	30	30
FAT-4	40	30	20	50	30	20	50	60	60	20	40	50	30	50	40
HLH-30	70	60	70	60	70	80	60	70	50	70	60	60	60	50	50
ATF-7	50	60	50	40	80	50	50	60	70	50	60	40	30	40	60
K06A4.7	40	30	40	40	20	40	30	20	10	30	40	40	40	10	40
MCA-3	30	50	20	20	40	40	30	60	40	60	40	40	80	30	40
M02H5.8	50	50	40	70	50	100	40	20	30	70	50	40	40	70	40
