# Supplementary material for: Eukaryotic initiation factor EIF-3.G augments mRNA translation efficiency to regulate neuronal activity
Source: eLife. 2021 Jul 29;10:e68336. doi: 10.7554/eLife.68336 (PMC8354637; doi:10.7554/eLife.68336)
Supplement: Figure 4—figure supplement 2—source data 4. — Length of 5’UTRs among mRNAs expressed in the human(hg38) transcriptome or human eIF3 target mRNAs. [file elife-68336-fig4-figsupp2-data4.xlsx]

## Sheet: Figure 4- figure supplement 2D
5'UTR length (nts)
hg38_5UTR	hg38_EIF3G5UTR
309	585
1008	482
268	498
74	1121
253	518
710	617
175	327
153	642
159	991
430	565
521	562
123	744
81	738
439	283
1016	329
337	1307
220	328
585	236
757	782
31	369
101	229
513	1163
1279	33
307	205
590	106
157	976
270	380
155	429
166	439
231	167
349	157
41	317
102	483
427	271
438	314
567	563
475	305
1016	344
292	206
476	96
74	432
244	159
495	359
153	192
100	113
74	958
1409	321
76	440
91	243
482	499
256	445
640	548
156	552
437	1427
806	517
40	280
296	240
677	581
458	587
300	643
571	444
279	900
319	278
258	383
230	423
77	310
21	143
30	434
500	633
336	673
498	485
114	504
132	459
279	347
311	446
169	217
374	157
344	384
103	838
543	2950
114	1450
87	911
1121	506
6789	555
579	494
34	545
75	1377
680	309
128	672
340	355
343	306
2356	331
768	367
105	186
93	52
358	440
1007	221
143	130
147	735
700	72
89	624
176	528
671	205
255	182
256	238
78	142
265	360
38	585
57	979
23	243
680	251
84	153
91	603
208	144
577	289
681	422
214	958
396	547
237	205
1007	198
146	531
94	587
106	628
132	552
518	313
294	637
617	83
351	1446
1500	82
378	834
137	368
820	673
318	31
127	204
823	508
345	321
1032	3244
492	227
117	722
542	266
321	404
327	525
233	918
451	383
487	241
677	467
142	1247
63	89
518	239
283	612
111	980
250	1469
74	187
388	29
638	442
268	91
231	357
58	368
85	243
393	331
727	314
35	375
187	277
339	1271
515	370
280	92
303	1332
13	110
710	234
213	469
213	663
34	1221
181	749
649	840
642	233
283	383
385	74
318	473
114	355
790	559
19	232
415	261
126	858
838	202
956	222
38	902
547	480
829	372
293	506
223	470
107	114
1365	873
118	203
189	226
1831	432
991	296
486	739
257	289
19	749
204	369
352	164
647	982
1084	485
200	381
909	610
639	90
551	548
173	1755
38	305
639	36
293	408
1162	499
354	720
470	1765
338	208
336	470
215	901
1419	531
323	122
176	258
87	433
167	609
60	879
659	723
297	819
38	488
63	182
335	534
223	543
209	762
288	539
241	458
805	254
147	691
371	1017
156	656
389	247
86	356
77	896
317	200
86	300
12	339
533	621
278	347
610	232
748	100
331	266
95	451
263	532
173	793
318	223
107	499
558	273
121	52
251	429
88
57
462
155
925
366
182
534
190
306
43
135
404
274
190
134
154
293
101
26
386
854
32
48
565
47
235
23
562
197
83
436
64
91
238
502
597
244
66
263
62
20
233
316
550
12
452
26
349
178
108
106
171
269
509
125
29
564
291
411
379
482
357
286
12
310
312
306
492
314
170
460
195
349
67
640
79
331
73
22
638
327
194
24
339
189
330
351
148
67
141
231
66
310
204
744
502
236
440
13
289
74
188
155
106
492
112
216
148
202
30
779
650
183
788
233
320
744
339
676
461
421
505
177
31
731
273
152
738
328
961
122
89
212
124
98
81
244
62
576
152
338
91
360
496
118
431
34
1190
828
302
406
1581
958
150
430
374
23
125
614
750
166
144
943
88
306
51
526
94
454
293
415
269
40
767
354
325
654
373
239
213
115
598
857
125
545
136
16
283
154
19
433
111
325
354
464
85
348
569
265
200
240
210
531
385
259
225
127
112
118
150
151
502
44
440
278
259
770
142
50
382
102
209
113
287
497
333
91
46
278
20
320
520
14
2031
483
505
361
814
77
168
402
250
293
60
208
269
529
236
609
1269
295
89
161
30
963
106
580
284
1306
392
81
100
15
280
1151
1500
776
131
424
21
329
183
74
205
28
838
316
252
559
488
114
630
19
266
344
83
387
173
63
34
74
199
1649
241
77
293
384
38
39
454
142
165
396
1039
240
323
95
140
542
194
161
175
82
158
1128
336
1233
46
495
440
579
774
80
70
554
443
36
1035
92
618
143
267
213
182
634
437
70
34
66
308
305
310
252
423
60
129
497
1143
287
606
178
443
722
206
67
469
179
334
136
778
242
23
856
108
259
429
908
337
174
114
400
168
26
193
617
147
38
214
1195
65
390
398
112
333
54
99
164
1307
484
389
252
130
358
344
642
151
1463
540
410
141
414
671
1321
381
1377
285
394
150
229
89
921
40
259
128
249
99
144
76
525
13
168
936
315
1222
186
154
91
21
39
136
89
136
178
83
16
189
370
69
999
329
57
75
181
384
290
882
334
363
186
461
417
17
358
92
368
114
279
223
325
27
124
543
56
350
337
464
3143
346
437
54
366
297
106
513
192
766
611
197
166
387
949
25
248
179
67
540
75
616
304
527
115
311
358
328
63
352
475
885
213
698
697
32
32
234
263
271
31
138
493
307
261
19
253
37
524
542
148
10
293
388
43
236
152
662
469
250
176
782
206
245
286
179
129
460
392
388
447
15
841
489
277
61
253
133
967
309
262
195
196
286
207
46
347
579
445
369
952
198
143
424
125
1689
16
221
342
96
3143
252
173
173
621
219
337
471
122
119
503
230
95
633
205
59
763
185
71
61
100
693
499
140
359
71
40
759
72
165
759
175
295
104
62
375
229
301
235
203
584
113
127
70
105
36
42
44
13
176
304
511
413
127
703
30
172
18
260
242
66
486
425
3136
857
97
163
667
229
579
44
485
299
596
508
1953
1361
773
212
170
337
299
72
175
420
104
400
527
190
572
195
30
127
140
297
159
1863
395
240
499
401
112
1024
137
172
162
130
139
3709
451
207
3248
209
1025
1207
1406
830
70
2658
681
172
615
600
137
115
32
134
449
104
154
151
40
556
847
410
230
110
529
518
1785
447
92
249
871
221
138
301
462
57
96
257
223
179
183
381
1007
497
245
141
107
292
405
309
387
87
344
138
301
878
67
269
288
101
381
211
293
32
90
724
426
446
42
183
331
564
788
830
451
58
792
361
245
713
178
27
259
51
176
1026
14
115
782
313
178
93
52
327
58
52
147
1260
188
1026
70
345
20
36
33
226
119
305
618
249
211
146
377
455
817
364
1163
436
108
266
117
389
899
605
781
22
327
637
96
138
171
202
44
423
575
148
59
358
20
200
182
58
69
81
160
90
53
253
250
546
10
73
1675
254
136
282
289
356
504
121
22
307
52
311
517
60
227
60
152
340
409
861
33
28
1492
11
339
425
135
166
268
71
830
252
324
224
1141
513
25
239
36
883
633
106
538
189
67
302
419
105
297
171
536
191
113
536
662
170
713
844
339
419
403
28
204
833
474
107
147
180
465
317
1018
476
118
652
186
123
123
156
778
462
59
99
272
216
434
345
90
80
494
69
423
212
283
399
174
255
381
289
177
403
436
899
186
385
357
202
447
54
39
404
1190
475
206
439
122
378
812
59
199
285
361
273
143
182
499
235
1169
404
956
52
374
2764
64
94
1448
104
643
226
98
91
88
67
143
61
147
286
358
41
88
836
25
33
89
205
247
21
79
116
447
330
42
114
129
362
331
3191
91
294
30
359
317
159
162
919
140
419
82
116
197
225
316
1740
152
1887
203
406
86
706
63
54
17
1072
190
62
528
346
357
106
325
30
544
387
572
272
81
301
798
912
390
148
439
679
493
1409
327
101
385
332
420
59
62
171
91
336
798
219
172
917
118
65
496
343
46
56
2212
548
152
429
798
403
181
92
478
205
492
375
207
250
206
226
327
549
63
482
76
440
2576
465
294
224
224
37
86
690
236
94
71
392
52
197
34
511
118
105
248
263
252
355
288
104
262
43
303
142
273
826
68
66
76
121
111
86
32
473
654
87
118
401
564
307
565
112
184
139
81
104
338
214
91
683
93
284
199
510
229
290
506
149
400
63
636
41
293
148
1901
337
132
303
1448
58
52
570
265
218
130
300
1038
423
285
3547
5544
976
403
338
124
201
242
68
34
282
661
656
60
348
1283
240
181
195
272
21
139
134
224
566
355
316
148
509
97
235
179
124
206
25
361
420
167
443
203
364
74
271
200
85
55
434
435
393
119
164
12
76
42
632
325
97
665
55
808
65
136
63
380
400
50
312
249
91
176
56
131
68
199
355
134
401
545
48
589
114
67
199
1116
235
283
65
31
96
95
819
138
237
88
484
215
508
11
182
380
455
63
267
396
342
346
400
71
208
106
429
49
213
173
23
379
62
103
173
216
58
157
583
212
91
259
402
31
215
170
206
10
148
1241
253
52
125
345
2118
253
30
25
216
95
108
271
50
143
491
480
448
254
68
53
69
180
78
601
49
248
503
34
235
94
63
222
485
929
34
113
186
451
60
102
304
143
462
269
198
172
39
164
100
391
93
850
126
470
386
31
205
104
66
147
57
111
56
19
160
752
588
15
66
109
293
23
266
435
171
270
873
909
55
621
369
217
119
404
214
631
103
343
598
671
389
846
146
138
279
216
27
679
239
325
847
816
210
475
401
294
389
22
809
46
475
809
126
32
212
126
31
191
105
336
98
184
263
361
1570
146
191
99
880
100
127
89
55
191
152
74
98
301
217
169
1705
49
497
464
117
332
734
86
446
173
107
303
567
1162
119
144
164
337
137
52
514
201
135
92
1093
228
178
330
801
849
208
885
144
172
95
439
48
134
104
41
286
85
2366
144
105
245
259
263
98
678
140
76
93
120
19
181
147
106
291
53
68
54
121
73
27
35
37
49
35
158
247
459
325
148
109
73
644
253
92
253
121
240
288
97
25
101
92
92
97
219
210
277
260
119
131
324
129
468
841
936
161
129
318
106
713
137
62
163
21
108
873
623
838
714
203
63
280
180
994
17
881
273
290
19
338
428
584
151
326
78
53
271
119
92
687
50
183
604
84
1698
636
430
59
694
175
426
169
298
71
683
69
173
79
1339
274
504
59
47
75
69
135
86
293
79
322
47
47
68
142
69
60
87
98
258
229
75
485
172
156
234
94
284
88
37
186
466
167
317
3825
36
249
33
74
32
823
458
1146
187
360
343
142
109
221
138
312
846
408
1060
446
72
1054
595
1161
157
80
72
948
78
74
84
1132
25
178
491
7848
74
89
393
183
185
1284
52
1153
73
238
92
279
241
303
49
241
214
92
16
147
196
74
92
469
59
309
278
81
269
111
249
19
708
266
246
38
200
18
18
482
101
141
2179
87
34
55
314
231
1265
443
465
388
226
223
237
416
546
496
217
129
86
258
193
124
878
313
469
334
581
531
199
32
242
[truncated: 17,416 more rows]
