# Supplementary material for: Eukaryotic initiation factor EIF-3.G augments mRNA translation efficiency to regulate neuronal activity
Source: eLife. 2021 Jul 29;10:e68336. doi: 10.7554/eLife.68336 (PMC8354637; doi:10.7554/eLife.68336)
Supplement: Figure 4—figure supplement 2—source data 5. — Percent GC in 5’UTRs among mRNAs expressed in the human(hg38) transcriptome or human eIF3 target mRNAs. [file elife-68336-fig4-figsupp2-data5.xlsx]

## Sheet: Figure 4- figure supplement 2E
5'UTR proportion GC
hg38_spliced	hg38_EIF3G_spliced
0.488706	0.552496
0.536585	0.580038
0.612903	0.688581
0.498382	0.729508
0.37996	0.679727
0.589552	0.442735
0.391892	0.345454
0.717647	0.682465
0.45283	0.607046
0.623116	0.613445
0.466403	0.746606
0.559155	0.491701
0.661017	0.4875
0.685345	0.543982
0.797101	0.666667
0.434907	0.76087
0.684543	0.545941
0.527132	0.635699
0.548768	0.44795
0.475096	0.741935
0.692593	0.613169
0.747253	0.601208
0.786127	0.632718
0.685431	0.590494
0.575862	0.528957
0.613014	0.645057
0.617328	0.551219
0.63964	0.718654
0.711165	0.55814
0.619694	0.574766
0.740933	0.41498
0.552496	0.59596
0.317224	0.554286
0.64574	0.627119
0.575385	0.715385
0.545828	0.688958
0.485232	0.799363
0.444711	0.371525
0.565934	0.616977
0.443548	0.657921
0.599078	0.656827
0.366038	0.561798
0.793103	0.769875
0.716279	0.570261
0.831579	0.372449
0.680473	0.511913
0.794872	0.56069
0.876405	0.517014
0.662857	0.5
0.604317	0.448802
0.400641	0.709859
0.784314	0.545752
0.502183	0.63142
0.769231	0.35206
0.526523	0.770017
0.530864	0.63535
0.574359	0.666667
0.677778	0.648562
0.480519	0.678295
0.68018	0.406467
0.56383	0.584565
0.63964	0.572271
0.398462	0.6875
0.634361	0.585034
0.742105	0.708333
0.464052	0.520833
0.688525	0.573864
0.51461	0.717073
0.552239	0.653521
0.651982	0.616352
0.736221	0.417827
0.723077	0.796875
0.782288	0.662162
0.423469	0.565556
0.676056	0.585366
0.78022	0.422607
0.54023	0.391753
0.804348	0.506562
0.745902	0.575269
0.44186	0.660079
0.609562	0.6
0.550459	0.765343
0.43038	0.710784
0.4941	0.65748
0.549479	0.529595
0.530612	0.468557
0.669565	0.516814
0.555992	0.346975
0.536	0.602151
0.846535	0.647697
0.436842	0.665474
0.822864	0.615108
0.616705	0.676113
0.573864	0.792135
0.625	0.511161
0.790698	0.483517
0.639535	0.590106
0.576531	0.52623
0.415613	0.593234
0.580038	0.574412
0.607029	0.402703
0.868421	0.668942
0.412409	0.598893
0.537002	0.63
0.738994	0.62536
0.728261	0.593381
0.658711	0.443459
0.57732	0.611111
0.732523	0.651491
0.533175	0.609023
0.610256	0.587642
0.525714	0.431915
0.514286	0.535088
0.440559	0.676471
0.763158	0.598165
0.866197	0.662651
0.578584	0.723404
0.489878	0.735426
0.811594	0.610966
0.55	0.481283
0.558333	0.682703
0.833333	0.663717
0.616153	0.626761
0.686508	0.647303
0.519056	0.683856
0.663866	0.654839
0.705706	0.692308
0.50573	0.511521
0.599747	0.694823
0.768817	0.75
0.545455	0.663594
0.504717	0.736667
0.787293	0.349206
0.599653	0.687956
0.759494	0.6557
0.533333	0.784141
0.450413	0.796178
0.537549	0.610647
0.631579	0.700935
0.742138	0.528662
0.661972	0.712644
0.527344	0.679688
0.341085	0.406921
0.553279	0.686275
0.679389	0.66129
0.70155	0.673781
0.721311	0.63983
0.450787	0.511509
0.488636	0.525745
0.686956	0.646288
0.569568	0.703963
0.688581	0.714286
0.419753	0.517699
0.8	0.476353
0.558685	0.696721
0.46832	0.705015
0.777778	0.574879
0.640288	0.619596
0.5	0.5
0.626214	0.600823
0.395928	0.618812
0.295337	0.667851
0.840909	0.691803
0.615176	0.420842
0.536825	0.693694
0.597633	0.541436
0.542645	0.695652
0.615527	0.514436
0.51145	0.758621
0.486692	0.627255
0.489637	0.67541
0.548926	0.627315
0.541936	0.686111
0.777778	0.530524
0.685353	0.307057
0.59204	0.727273
0.630435	0.726829
0.710526	0.754545
0.467442	0.717949
0.557143	0.714286
0.518949	0.68
0.695444	0.753153
0.829787	0.790698
0.417678	0.742718
0.645714	0.773463
0.697318	0.646154
0.794521	0.582022
0.725807	0.482711
0.774411	0.658537
0.755459	0.715329
0.408829	0.754717
0.731707	0.583333
0.432099	0.512821
0.60479	0.67029
0.479452	0.693878
0.728929	0.572022
0.671875	0.732143
0.726562	0.659389
0.536458	0.804511
0.454012	0.726251
0.462598	0.747253
0.661721	0.469136
0.75	0.479327
0.477612	0.705996
0.374449	0.649402
0.65	0.707434
0.838235	0.584518
0.729814	0.69281
0.729508	0.79049
0.67581	0.697789
0.53917	0.690254
0.812749	0.427381
0.617647	0.650615
0.588235	0.672297
0.68932	0.493911
0.818182	0.641791
0.475177	0.680556
0.679727	0.429185
0.774193	0.586207
0.895196	0.686598
0.516288	0.611111
0.74514	0.642857
0.597285	0.778068
0.822115	0.763158
0.72	0.573426
0.539863	0.566929
0.661682	0.589674
0.572581	0.673993
0.761905	0.760181
0.56213	0.697917
0.442735	0.517088
0.791907	0.605392
0.588235	0.525
0.380952	0.764706
0.619551	0.557692
0.709677	0.551102
0.52518	0.662162
0.762376	0.475
0.516569	0.785877
0.747525	0.661654
0.627451	0.564103
0.78	0.639093
0.763231	0.730769
0.799392	0.423404
0.628692	0.519359
0.63018	0.634146
0.550489	0.732673
0.477707	0.390738
0.345454	0.511654
0.64	0.75817
0.548673	0.692308
0.605991	0.546039
0.683983	0.688623
0.539773	0.634615
0.681173	0.611465
0.596422
0.572519
0.706667
0.742857
0.653333
0.538071
0.54
0.456311
0.683006
0.660318
0.583144
0.608421
0.484507
0.54088
0.420339
0.450082
0.509934
0.44586
0.77037
0.645161
0.656627
0.591133
0.494253
0.739623
0.701923
0.689655
0.729167
0.516129
0.553752
0.8
0.511905
0.614198
0.552632
0.478261
0.791667
0.682465
0.521739
0.807339
0.495775
0.513089
0.550696
0.569405
0.732719
0.387043
0.342857
0.594595
0.6
0.604784
0.773163
0.507042
0.636364
0.61588
0.425926
0.562791
0.583051
0.502632
0.635009
0.726496
0.665272
0.562057
0.514483
0.44052
0.607046
0.796117
0.486014
0.596154
0.7
0.747634
0.705757
0.621622
0.809524
0.580952
0.756219
0.711191
0.541985
0.75974
0.723577
0.595556
0.706587
0.514644
0.409396
0.560836
0.591811
0.463576
0.786667
0.623874
0.707792
0.616216
0.587591
0.641791
0.612903
0.8
0.70557
0.45977
0.475043
0.644295
0.571429
0.58
0.460993
0.714286
0.552402
0.639286
0.647059
0.641129
0.416822
0.690909
0.714286
0.585687
0.527397
0.666667
0.596413
0.706897
0.653973
0.369627
0.390244
0.559664
0.70438
0.395437
0.554632
0.513292
0.400657
0.546703
0.592965
0.636364
0.75
0.544444
0.647059
0.566116
0.648515
0.735043
0.512255
0.5
0.637931
0.654321
0.804511
0.66573
0.597765
0.574468
0.345946
0.688525
0.815584
0.573892
0.623762
0.549485
0.468037
0.506803
0.613954
0.706897
0.460784
0.623037
0.739437
0.550349
0.631016
0.625
0.424901
0.451499
0.425952
0.660714
0.49537
0.557604
0.726606
0.556025
0.531707
0.517495
0.433526
0.637527
0.538153
0.616364
0.691824
0.613445
0.329986
0.468208
0.408421
0.775
0.493204
0.645963
0.387255
0.815789
0.556102
0.763699
0.66537
0.747059
0.434874
0.586207
0.784946
0.704301
0.539295
0.552561
0.515764
0.727273
0.663717
0.698413
0.757576
0.648649
0.648089
0.568627
0.626087
0.692422
0.665127
0.722986
0.459716
0.413934
0.441648
0.658228
0.674419
0.620202
0.546798
0.691244
0.588235
0.448498
0.78
0.365385
0.587361
0.617537
0.453571
0.591472
0.798165
0.468
0.537555
0.779359
0.532609
0.636364
0.746606
0.8
0.656716
0.637584
0.432
0.44898
0.609375
0.558559
0.685221
0.49
0.662162
0.560897
0.713942
0.625
0.628505
0.450237
0.511861
0.451915
0.671233
0.615741
0.394606
0.419374
0.714286
0.604651
0.402685
0.61705
0.75
0.654882
0.594595
0.691824
0.526316
0.476106
0.509018
0.624473
0.626623
0.618421
0.436729
0.820513
0.709677
0.75
0.487448
0.809955
0.681319
0.426829
0.567823
0.631579
0.366667
0.372516
0.597765
0.445454
0.556911
0.491701
0.497863
0.696498
0.640596
0.69863
0.639344
0.668874
0.643087
0.347656
0.4875
0.712121
0.542857
0.762542
0.606557
0.684615
0.693431
0.478571
0.677661
0.76555
0.479675
0.560197
0.751634
0.380682
0.723577
0.458333
0.509615
0.444643
0.644211
0.413706
0.438525
0.590529
0.520661
0.667702
0.447476
0.522321
0.465241
0.715625
0.560417
0.835556
0.60452
0.424901
0.680203
0.626556
0.334572
0.480687
0.642857
0.63299
0.542857
0.647436
0.668281
0.465838
0.739535
0.606822
0.630996
0.8
0.644068
0.631111
0.466819
0.371274
0.481013
0.6375
0.84492
0.532143
0.606838
0.789286
0.481633
0.507444
0.785714
0.75
0.72561
0.443535
0.668508
0.64
0.551181
0.634259
0.837838
0.502994
0.500578
0.526077
0.571014
0.718391
0.737942
0.626866
0.579515
0.670251
0.516908
0.686335
0.647059
0.695946
0.416667
0.730769
0.454545
0.8
0.57377
0.445727
0.501048
0.696658
0.681943
0.70405
0.733075
0.6917
0.343434
0.485075
0.421846
0.798246
0.567816
0.5
0.592705
0.69078
0.403509
0.805556
0.479846
0.727273
0.584098
0.283019
0.506647
0.574932
0.865217
0.437209
0.644105
0.664336
0.512635
0.397661
0.783333
0.457093
0.673835
0.420063
0.503876
0.647788
0.797844
0.543982
0.635678
0.642336
0.590909
0.615385
0.434084
0.672165
0.431818
0.57064
0.446215
0.662992
0.548571
0.658228
0.496667
0.776667
0.753623
0.386131
0.616613
0.642857
0.8
0.76087
0.333333
0.685131
0.738462
0.581233
0.644258
0.490909
0.535276
0.552511
0.618182
0.423892
0.692308
0.698113
0.805147
0.462264
0.462366
0.640351
0.636364
0.519274
0.817204
0.653722
0.794118
0.776316
0.610656
0.838583
0.809524
0.7
0.664
0.617647
0.592593
0.604938
0.7625
0.438016
0.771429
0.615672
0.632
0.505952
0.648
0.809524
0.794521
0.666667
0.789474
0.643939
0.586331
0.548387
0.385852
0.756604
0.513333
0.539256
0.737589
0.85
0.703125
0.652561
0.671819
0.720848
0.672662
0.585799
0.614634
0.674556
0.835381
0.446565
0.40599
0.770833
0.374565
0.808333
0.51444
0.691176
0.720183
0.609626
0.746057
0.465753
0.676056
0.633333
0.53913
0.712121
0.666667
0.592105
0.483965
0.67162
0.526539
0.335
0.85
0.522766
0.753571
0.76087
0.513889
0.627907
0.814815
0.601942
0.54717
0.600823
0.538265
0.566416
0.546053
0.427256
0.564565
0.854054
0.792969
0.684211
0.429546
0.557377
0.440972
0.562075
0.837607
0.678161
0.608247
0.545941
0.377817
0.672727
0.483592
0.647059
0.575701
0.628472
0.679054
0.598499
0.805825
0.624113
0.773333
0.541667
0.693038
0.726054
0.739726
0.414474
0.663158
0.552
0.753555
0.577566
0.751521
0.475149
0.612039
0.714628
0.663793
0.564706
0.859375
0.405882
0.558313
0.559767
0.793443
0.554393
0.640777
0.551515
0.719033
0.671348
0.69863
0.616071
0.620879
0.734828
0.761905
0.620202
0.635714
0.75
0.671795
0.639896
0.520548
0.399359
0.636691
0.563492
0.545126
0.638418
0.671875
0.510822
0.433119
0.465168
0.7
0.542781
0.622829
0.658462
0.559603
0.533149
0.562626
0.552925
0.595668
0.630252
0.635699
0.474359
0.554622
0.648077
0.689394
0.449664
0.78012
0.71831
0.778107
0.459352
0.363388
0.594108
0.517767
0.463357
0.693333
0.461268
0.622222
0.579882
0.742775
0.527734
0.784091
0.650655
0.378238
0.623188
0.834225
0.561119
0.613793
0.603648
0.617647
0.680756
0.669771
0.719697
0.75
0.886957
0.798387
0.665738
0.662222
0.397193
0.328947
0.71
0.592593
0.636364
0.413223
0.459635
0.677643
0.550526
0.73494
0.397683
0.59292
0.727891
0.809524
0.61523
0.654088
0.888889
0.770213
0.714286
0.457346
0.44795
0.612903
0.662011
0.743902
0.791667
0.781022
0.530516
0.490347
0.538947
0.463748
0.569948
0.661458
0.500898
0.59854
0.619149
0.703448
0.645161
0.551142
0.46425
0.658915
0.701754
0.727273
0.695431
0.763636
0.69163
0.383234
0.659744
0.773333
0.574209
0.792
0.79021
0.415751
0.791667
0.515602
0.647502
0.741935
0.806818
0.646018
0.70068
0.737654
0.752857
0.476323
0.782123
0.662921
0.729032
0.569231
0.602273
0.603577
0.560784
0.801587
0.544061
0.539062
0.461539
0.622641
0.675676
0.567568
0.668524
0.556391
0.677419
0.372937
0.688889
0.528833
0.578947
0.705882
0.550046
0.552239
0.604651
0.663102
0.742021
0.725275
0.732252
0.479657
0.585859
0.51938
0.622222
0.627848
0.576619
0.513369
0.574163
0.613251
0.59322
0.680451
0.752212
0.734831
0.5
0.716895
0.588629
0.748792
0.660526
0.716867
0.666667
0.649123
0.553106
0.549801
0.520368
0.608696
0.613169
0.52907
0.619118
0.689157
0.714286
0.551051
0.562775
0.689373
0.772487
0.763052
0.599503
0.685144
0.810078
0.760684
0.654887
0.726714
0.692632
0.85348
0.572072
0.54329
0.591615
0.718605
0.527157
0.653251
0.737705
0.759036
0.560878
0.831715
0.416667
0.519916
0.613333
0.545161
0.818182
0.816092
0.460317
0.607477
0.480278
0.585077
0.446429
0.666667
0.598344
0.688153
0.778846
0.364205
0.582397
0.698795
0.709302
0.693333
0.565574
0.797688
0.524138
0.458886
0.592742
0.66573
0.477528
0.604396
0.653846
0.733333
0.395679
0.817073
0.670711
0.516456
0.803191
0.496241
0.576923
0.746667
0.788618
0.828571
0.477239
0.640091
0.61215
0.601208
0.394649
0.617241
0.443456
0.801653
0.553398
0.547619
0.547486
0.709581
0.566667
0.810811
0.739437
0.496183
0.449311
0.490239
0.42499
0.751515
0.581395
0.577873
0.804878
0.437071
0.434932
0.525836
0.58427
0.766667
0.647761
0.632718
0.837838
0.624041
0.72
0.687307
0.490231
0.557823
0.666667
0.519459
0.703633
0.611748
0.611429
0.55608
0.625468
0.800905
0.670236
0.589286
0.598485
0.65283
0.875339
0.718133
0.628692
0.604511
0.752137
0.430983
0.629545
0.842466
0.714286
0.628289
0.527473
0.65566
0.766578
0.410468
0.612745
0.751773
0.673171
0.409283
0.774648
0.595618
0.571429
0.685883
0.661905
0.654135
0.685185
0.780702
0.562639
0.594758
0.611425
0.848039
0.571984
0.635945
0.687773
0.707889
0.837209
0.408451
0.694268
0.380463
0.754545
0.466942
0.628571
0.631579
0.689189
0.39823
0.69958
0.521739
0.719063
0.435567
0.854839
0.600946
0.769231
0.690476
0.5
0.502632
0.708185
0.777202
0.557252
0.738095
0.69967
0.627706
0.703297
0.58284
0.666667
0.720414
0.437956
0.533654
0.664216
0.572438
0.574468
0.765579
0.576172
0.721429
0.767956
0.713514
0.619385
0.527204
0.77095
0.736842
0.547586
0.510328
0.591195
0.884615
0.671875
0.734899
0.590494
0.755102
0.7
0.444444
0.582237
0.877193
0.457143
0.455026
0.596566
0.784314
0.640969
0.635736
0.763158
0.596954
0.564103
0.448431
0.583333
0.668596
0.398214
0.30226
0.424
0.368491
0.443396
0.651515
0.778947
0.449367
0.451841
0.779817
0.684848
0.724684
0.42
0.445652
0.482966
0.771429
0.797753
0.658228
0.841146
0.649171
0.360045
0.591912
0.75
0.671642
0.772727
0.819767
0.784
0.486557
0.77533
0.527977
0.751269
0.412025
0.554839
0.462754
0.73913
0.55
0.566535
0.439024
0.761194
0.421053
0.528957
0.468379
0.666667
0.771739
0.72973
0.816327
0.382812
0.632155
0.542714
0.553872
0.570994
0.57958
0.423077
0.645057
0.408998
0.436759
0.641975
0.584184
0.75641
0.460199
0.590308
0.45283
0.422156
0.550111
0.470175
0.579848
0.773438
0.757835
0.545213
0.573333
0.717425
0.657224
0.677273
0.684455
0.72766
0.857843
0.475043
0.761404
0.754286
0.566456
0.785714
0.430239
0.76506
0.716216
0.766949
0.68306
0.676558
0.58042
0.473469
0.385057
0.65
0.594048
0.727273
0.363333
0.777778
0.584416
0.697183
0.634945
0.452174
0.710769
0.776471
0.439907
0.663462
0.37037
0.591241
0.823529
0.508748
0.669512
0.551282
0.525084
0.510067
0.561135
0.603245
0.644979
0.670068
0.561205
0.602151
0.714286
0.73805
0.581047
0.86
0.534591
0.529412
0.767123
0.585366
0.792079
0.711806
0.5
0.395604
0.691358
0.514957
0.781095
0.818182
0.695187
0.606299
0.513973
0.600311
0.727273
0.598837
0.597101
0.615385
0.563492
0.443099
0.551219
0.694969
0.733333
0.39485
0.679365
0.631927
0.295752
0.643518
0.461539
0.622177
0.54845
0.585366
0.709402
0.385281
0.44958
0.820896
0.586777
0.732979
0.655431
0.705882
0.665605
0.753333
0.661017
0.476096
0.51184
0.808824
0.602871
0.504493
0.649874
0.385542
0.371212
0.504022
0.701835
0.295082
0.537275
0.52993
0.470149
0.550882
0.892405
0.47482
0.649863
0.673432
0.594937
0.585821
0.522358
0.550201
0.749129
0.535256
0.428105
0.607143
0.619938
0.664103
0.633027
0.50831
0.491474
0.642523
0.443548
0.406546
0.671687
0.718654
0.590698
0.662921
0.656652
0.619048
0.833333
0.406619
0.490196
0.505208
0.733333
0.7
0.554529
0.509434
0.611354
0.60355
0.483606
0.54102
0.5518
0.651961
0.382022
0.691992
0.656347
0.514925
0.551579
0.635281
0.842105
0.667235
0.579096
0.661972
0.612121
0.3
0.637795
0.579208
0.629454
0.565731
0.648889
0.594937
0.371897
0.392523
0.414097
0.604839
0.632258
0.707246
0.623377
0.626866
0.375587
0.573284
0.738462
0.446483
0.534335
0.494432
0.678423
0.721804
0.472851
0.402697
0.537234
0.581208
0.700183
0.48503
0.771186
0.682927
0.677966
0.391304
0.746
0.673772
0.45946
0.486813
0.657343
0.427107
0.492063
0.714286
0.75
0.549388
0.786956
0.359155
0.507463
0.623932
0.587302
0.752896
0.702703
0.414634
0.654362
0.620795
0.536946
0.671965
0.351485
0.549133
0.527638
0.649123
0.526154
0.39576
0.648649
0.716
0.596639
0.48803
0.829741
0.607088
0.69403
0.605442
0.702703
0.8
0.674419
0.452555
0.705007
0.45
0.360902
0.521327
0.731959
0.704225
0.430894
0.644201
0.689218
0.597561
0.439316
0.47234
0.624161
0.628362
0.571429
0.481586
0.76569
0.647619
0.66559
0.585246
0.734127
0.631579
0.668161
0.756831
0.574627
0.779221
0.586207
0.518248
0.623377
0.668027
0.550489
0.613333
0.578411
0.60334
0.59619
0.596996
0.613734
0.494318
0.455645
0.544747
0.75
0.717391
0.408589
0.43426
0.797297
0.612121
0.72
0.752941
0.771429
0.697674
0.554054
0.407311
0.45976
0.676471
0.660377
0.372294
0.569728
0.476744
0.468965
0.637427
0.719943
0.6
0.713592
0.598901
0.555906
0.7046
0.53184
0.636364
0.55814
0.650847
0.755725
0.599725
0.742857
0.720627
0.55
0.718841
0.550109
0.524138
0.70297
0.621429
0.818182
0.493036
0.430723
0.657754
0.820059
0.704854
0.592857
0.763779
0.460993
0.661801
0.655518
0.678756
0.700382
0.569231
0.613333
0.508861
0.708791
0.515151
0.628647
0.609499
0.566116
0.611276
0.55
0.61876
0.364005
0.640805
0.434238
0.764493
0.56962
0.660066
0.777778
0.384615
0.65493
0.754902
0.661616
0.600939
0.479592
0.722458
0.769231
0.546468
0.686747
0.676471
0.748848
0.528689
0.367171
0.530516
0.529412
0.59116
0.533865
0.758621
0.508353
0.292453
0.587057
0.574766
0.75265
0.672269
0.758065
0.572864
0.589286
0.603239
0.710843
0.619048
0.618529
0.78022
0.542005
0.67893
0.443609
0.762162
0.653509
0.851852
0.695652
0.517094
0.5
0.605263
0.418586
0.488312
0.41498
0.461539
0.636364
0.44898
0.540278
0.535593
0.705882
0.502212
0.721311
0.751572
0.596
0.626354
0.647059
0.571429
0.590909
0.690189
0.59596
0.694215
0.886792
0.397959
0.694362
0.787879
0.510204
0.804819
0.6875
0.623762
0.516129
0.615094
0.529326
0.702703
0.651376
0.693029
0.56044
0.658065
0.755814
0.519768
0.666667
0.522917
0.736
0.678112
0.711207
0.664894
0.822695
0.643234
0.634877
0.492035
0.538961
0.559738
0.689076
0.597536
0.457399
0.657952
0.6
0.597015
0.640351
0.564171
0.509434
0.494311
0.538314
0.690377
0.55814
0.597484
0.882353
0.649123
0.662338
0.789969
0.557432
0.554286
0.72619
0.568306
0.739726
0.389023
0.731343
0.6
0.821429
0.666041
0.613636
0.629108
0.659292
0.424743
0.666667
0.488889
0.812734
0.752809
0.748879
0.786127
0.599769
0.705357
0.761194
0.562712
0.842697
0.777778
0.621103
0.634216
0.415094
0.716418
0.628459
0.60574
0.806122
0.741848
0.559099
0.477528
0.762376
0.543046
0.471698
0.719298
0.405523
0.512821
0.470293
0.617225
0.478599
0.542553
0.65
0.72043
0.495495
0.492188
0.764706
0.422839
0.590015
0.5311
0.583519
0.746835
0.52459
0.579766
0.741177
0.542857
0.760736
0.435345
0.554302
0.644231
0.564257
0.655084
0.627119
0.827225
0.593104
0.513189
0.606947
0.642241
0.765306
0.561201
0.67101
0.571429
0.715385
0.624625
0.688958
0.715736
0.490544
0.706284
0.489773
0.654762
0.583942
0.383709
0.78903
0.391911
0.439716
0.693333
0.625316
0.666667
0.703196
0.427975
0.627863
0.421053
0.70274
0.603774
0.445183
0.498795
0.618375
0.606061
0.72
0.701923
0.555556
0.365079
0.68254
0.65942
0.461539
0.448345
0.507194
0.601942
0.483108
0.671679
0.857143
0.651026
0.803922
0.823529
0.555076
0.661602
0.655131
0.632076
0.661702
0.746032
0.370293
0.717881
0.616352
0.647887
0.381333
0.621212
0.763158
0.664922
0.740741
0.709402
0.546342
0.643312
0.6875
0.695971
0.367047
0.526717
0.45
0.688
0.448276
0.523992
0.631387
0.668293
0.427861
0.616279
0.635193
0.602339
0.454688
0.655172
0.735849
0.667883
0.411311
0.492537
0.502703
0.578947
0.498886
0.599327
0.799363
0.573506
0.588101
0.540373
0.589878
0.864865
0.563594
0.51049
0.423445
0.447368
0.625468
0.585492
0.478738
0.703297
0.50211
0.571675
0.524862
0.457983
0.466667
0.55665
0.54219
0.567114
0.616667
0.578431
0.60687
0.440269
0.640625
0.7251
0.583148
0.412017
0.406639
0.72271
0.371525
0.417722
0.714286
0.59854
0.573171
0.626106
0.594235
0.658703
0.595238
0.410974
0.673004
0.521685
0.513011
0.493044
0.55
0.647166
0.587455
0.72093
0.62406
0.595833
0.576792
0.668161
0.635514
0.549053
0.667546
0.686918
0.484185
0.550183
0.576271
0.59246
0.457295
0.680473
0.508182
0.35281
0.441352
0.667213
0.551084
0.740741
0.620155
0.505882
0.528487
0.573529
0.603376
0.417323
0.6
0.527861
0.401002
0.391534
0.441835
0.627737
0.541667
0.547872
0.6
0.43018
0.625767
0.854932
0.371469
[truncated: 17,416 more rows]
