# Supplementary material for: Eukaryotic initiation factor EIF-3.G augments mRNA translation efficiency to regulate neuronal activity
Source: eLife. 2021 Jul 29;10:e68336. doi: 10.7554/eLife.68336 (PMC8354637; doi:10.7554/eLife.68336)
Supplement: Figure 4—source data 1. — Number of read clusters representing footprints of EIF-3.G(WT) or EIF-3.G(C130Y) mapping to 5′UTR proximal or 3′UTR regions. [file elife-68336-fig4-data1.xlsx]

## Sheet: Figure 4A
#	clusters/footprints
	WT	C130Y
5' UTR_proximal	179	114
3' UTR	32	39
total	211	153
percent %	clusters/footprints
	WT	C130Y
5' UTR_proximal	1	1
3' UTR	0.178771	0.342105
total	1.17877	1.34211
