# Supplementary material for: Eukaryotic initiation factor EIF-3.G augments mRNA translation efficiency to regulate neuronal activity
Source: eLife. 2021 Jul 29;10:e68336. doi: 10.7554/eLife.68336 (PMC8354637; doi:10.7554/eLife.68336)
Supplement: Figure 4—source data 2. — seCLIP reads for EIF-3.G(WT) and EIF-3.G(C130Y) 5’UTR proximal footprints represented as log2(reads per million). [file elife-68336-fig4-data2.xlsx]

## Sheet: Figure 4C
			natural		log2
	genename	location	WT_max_CLIP	C130Y_max_CLIP	WT_max_CLIP	C130Y_max_CLIP
0	C03H5.6	5utr	22.7696	12.8138	4.50904	3.67963
1	C08G9.1	5utr	28.6547	23.7016	4.8407	4.56691
2	C10G8.4	CDS	21.261	26.751	4.41014	4.74152
3	C13A10.2	CDS	25.171	7.0152	4.65369	2.81048
4	C15H9.9	CDS	31.1508	21.1388	4.9612	4.40182
5	C24A3.2	CDS	22.1337	26.9374	4.46817	4.75154
6	C28H8.3	CDS	13.042	12.4773	3.70509	3.64123
7	C34B4.2	CDS	23.7098	18.7625	4.56741	4.22978
8	C37C3.2	5utr	24.3456	15.2833	4.60559	3.93389
9	C42D4.1	CDS	40.9661	30.1369	5.35636	4.91346
10	C44E4.4	CDS	14.9496	23.7585	3.90204	4.57037
11	C49H3.16	CDS	59.0548	53.8022	5.88398	5.74959
12	F14E5.2	CDS	16.6204	10.5512	4.05488	3.39934
13	F15D3.6	CDS	10.7827	26.228	3.43064	4.71304
14	F19C7.1	CDS	33.647	48.4697	5.0724	5.59901
15	F21D5.7	CDS	42.4948	55.3553	5.40921	5.79065
16	F22B7.9	CDS	19.8744	18.2395	4.31284	4.189
17	F22F4.4	5utr	8.47598	23.2149	3.08338	4.53698
18	F31D4.9	CDS	38.9909	37.9753	5.28507	5.24699
19	F31F7.1	5utr	22.2959	16.9297	4.47871	4.08148
20	F40F4.6	CDS	52.3645	29.0704	5.71052	4.86148
21	F42A10.6	CDS	23.216	21.0819	4.53705	4.39794
22	F49C12.12	CDS	27.5724	19.829	4.78515	4.30954
23	F53A2.7	CDS	14.0094	20.9887	3.80832	4.39154
24	F53F10.2	5utr	55.7061	68.542	5.79976	6.09892
25	F54C9.3	CDS	36.5623	21.1957	5.19228	4.4057
26	F57F5.1	CDS	103.248	72.4509	6.68996	6.17893
27	F59A2.6	CDS	14.219	13.3573	3.82975	3.73956
28	F59F4.2	CDS	13.563	19.099	3.7616	4.25543
29	K02D7.1	CDS	28.181	25.1046	4.81665	4.64988
30	K06A4.7	CDS	40.7565	45.6636	5.34896	5.51297
31	M02B1.3	CDS	13.2788	25.7777	3.73105	4.68805
32	M02H5.8	CDS	20.6725	30.5667	4.36964	4.93389
33	M4.1	CDS	17.4457	8.26814	4.1248	3.04756
34	R03E1.2	CDS	17.3984	8.0817	4.12088	3.01466
35	R11F4.1	CDS	11.5133	22.9716	3.52523	4.52178
36	R12C12.1	CDS	22.695	15.9201	4.5043	3.99278
37	T02G5.7	CDS	59.6634	23.7948	5.89877	4.57257
38	T02H6.11	CDS	24.2509	15.8063	4.59997	3.98243
39	T12D8.5	CDS	36.9684	19.4925	5.20822	4.28484
40	T16A9.3	CDS	25.5025	13.2072	4.67257	3.72325
41	T20D3.2	CDS	39.4373	28.5838	5.30149	4.83712
42	T21H3.1	CDS	133.269	79.0727	7.05819	6.30511
43	T22E5.1	CDS	22.4854	8.90488	4.49092	3.1546
44	T22F3.11	CDS	22.7897	6.52856	4.51031	2.70677
45	T22F3.3	CDS	56.4639	89.5671	5.81926	6.4849
46	T26C5.5	CDS	32.4226	21.5686	5.01893	4.43086
47	T27C4.1	CDS	38.8962	21.4185	5.28156	4.42078
48	T27E9.2	CDS	50.4568	50.4731	5.65698	5.65744
49	T28B8.1	CDS	28.6073	25.1615	4.83831	4.65315
50	W02B12.15	CDS	41.8186	26.3576	5.38607	4.72015
51	Y111B2A.9	CDS	14.8347	19.829	3.89091	4.30954
52	Y119D3B.21	CDS	55.9429	165.631	5.80588	7.37183
53	Y34B4A.9	CDS	33.6943	28.5838	5.07443	4.83712
54	Y38F2AR.9	CDS	27.6198	34.4393	4.78763	5.10598
55	Y39E4B.6	CDS	18.65	15.1901	4.2211	3.92506
56	Y43C5A.2	CDS	58.0873	7.10842	5.86015	2.82953
57	Y44A6D.2	5utr	49.4219	41.0247	5.62708	5.35842
58	Y44A6D.2	CDS	33.647	35.4125	5.0724	5.14619
59	Y46E12BR.1	CDS	25.0289	34.9259	4.64552	5.12623
60	Y51A2D.14	CDS	23.6896	10.5876	4.56618	3.4043
61	Y54G2A.10	5utr	28.959	33.0362	4.85594	5.04598
62	Y54G2A.36	5utr	3.03729	37.3022	1.60278	5.22119
63	Y55B1BL.1	CDS	26.6322	12.8138	4.7351	3.67963
64	Y56A3A.19	CDS	32.3278	23.6084	5.01471	4.56123
65	Y59C2A.2	CDS	26.1384	55.428	4.7081	5.79254
66	Y73B6BL.35	CDS	25.1438	14.8536	4.65213	3.89274
67	ZK1320.2	CDS	22.4854	13.9735	4.49092	3.80462
68	ZK180.5	CDS	137.097	56.8515	7.09905	5.82913
69	ZK484.1	5utr	29.0537	43.5306	4.86065	5.44396
70	ZK596.3	CDS	38.5445	25.5344	5.26845	4.67437
71	ZK6.11	CDS	24.6973	16.2566	4.62628	4.02296
72	ZK856.7	CDS	30.7921	18.3896	4.94449	4.20082
73	acbp-1	CDS	40.9459	40.2015	5.35565	5.32918
74	acdh-3	CDS	20.4357	7.35174	4.35302	2.87809
75	ace-2	CDS	20.7874	22.6351	4.37763	4.50049
76	acin-1	CDS	14.5979	26.8079	3.86769	4.74458
77	aco-1	CDS	3.76789	19.4356	1.91376	4.28063
78	adr-1	CDS	148.955	97.467	7.21873	6.60684
79	akt-1	CDS	10.1468	18.7625	3.34295	4.22978
80	alh-9	CDS	19.6577	31.6901	4.29702	4.98596
81	aly-3	CDS	25.4279	29.8004	4.66834	4.89726
82	asp-13	CDS	21.3084	8.26814	4.41335	3.04756
83	asp-2	CDS	85.2335	73.8903	6.41335	6.20731
84	atf-7	CDS	22.5327	38.0322	4.49395	5.24915
85	atn-1	CDS	13.6305	7.9316	3.76877	2.98761
86	attf-2	CDS	32.6997	63.8304	5.0312	5.99617
87	brp-1	CDS	56.8357	53.295	5.82873	5.73593
88	cdk-1	CDS	9.7951	21.4185	3.29206	4.42078
89	clec-88	CDS	14.74	33.8594	3.88167	5.08148
90	cnb-1	CDS	20.6251	6.8651	4.36633	2.77928
91	col-103	CDS	20.5103	21.5686	4.35827	4.43086
92	col-138	CDS	54.6711	25.9847	5.77271	4.69959
93	col-142	CDS	21.3084	6.52856	4.41335	2.70677
94	col-143	CDS	26.9365	25.3479	4.75149	4.6638
95	col-17	CDS	87.2157	36.6655	6.44652	5.19635
96	col-71	CDS	52.0531	30.3802	5.70191	4.92506
97	col-98	CDS	12.0071	19.0058	3.58581	4.24837
98	cpg-8	CDS	19.0017	19.5857	4.24806	4.29173
99	cpz-1	CDS	44.0306	25.1978	5.46043	4.65523
100	cuc-1	CDS	9.06449	26.3576	3.18023	4.72015
101	cul-1	CDS	56.3621	36.9657	5.81665	5.20811
102	cyk-4	CDS	78.266	28.2472	6.29031	4.82004
103	cyn-3	CDS	38.7813	28.154	5.27729	4.81527
104	dhc-1	CDS	23.872	20.559	4.57725	4.3617
105	dnj-20	CDS	32.7743	25.8346	5.03449	4.69123
106	eef-1B.1	CDS	34.3503	30.3439	5.10225	4.92333
107	eef-1B.2	CDS	28.1135	35.7854	4.81319	5.1613
108	eel-1	CDS	14.3137	8.26814	3.83933	3.04756
109	egl-3	CDS	48.8062	28.0244	5.60899	4.80861
110	egl-30	5utr	36.779	40.0514	5.20081	5.32378
111	eif-6	CDS	26.6523	22.7852	4.73619	4.51002
112	ell-1	CDS	15.5855	11.3744	3.96213	3.50772
113	elo-1	CDS	23.6624	28.0039	4.56453	4.80756
114	elo-6	CDS	46.9731	39.8081	5.55376	5.31499
115	enpl-1	CDS	62.5515	75.0547	5.96697	6.22987
116	epg-2	CDS	37.7867	23.9449	5.23981	4.58165
117	far-8	CDS	22.5327	15.1901	4.49395	3.92506
118	fat-3	CDS	21.5653	16.0133	4.43064	4.0012
119	fat-4	CDS	19.4007	7.9316	4.27804	2.98761
120	fbxa-215	CDS	9.84246	15.7131	3.29902	3.9739
121	fkb-1	CDS	33.9241	16.65	5.08424	4.05745
122	flp-11	CDS	38.3077	6.52856	5.25956	2.70677
123	flp-12	CDS	25.57	13.9735	4.67638	3.80462
124	flp-14	CDS	13.6305	9.82128	3.76877	3.29591
125	flp-18	CDS	34.7293	33.673	5.11808	5.07352
126	flp-9	5utr	14.9496	10.4011	3.90204	3.37867
127	flp-9	CDS	49.7736	32.6428	5.63731	5.02869
128	frm-9	CDS	26.8892	15.3402	4.74895	3.93925
129	fum-1	CDS	22.2012	31.7264	4.47257	4.98761
130	goa-1	CDS	37.5297	54.8118	5.22996	5.77641
131	gpc-2	CDS	29.3379	14.2168	4.87469	3.82953
132	gpd-3	CDS	45.1804	38.1254	5.49762	5.25268
133	grsp-4	CDS	11.0195	18.2759	3.46198	4.19187
134	gsa-1	CDS	40.1206	38.9849	5.32627	5.28484
135	gsp-2	CDS	96.4152	108.687	6.59119	6.76403
136	gtbp-1	CDS	16.2214	32.3268	4.01982	5.01466
137	hlh-30	CDS	27.0786	23.9449	4.75908	4.58165
138	hrp-1	5utr	22.2284	18.0531	4.47433	4.17417
139	jmjd-1.2	CDS	11.3712	22.0757	3.50731	4.46439
140	kin-10	5utr	31.1508	9.33464	4.9612	3.22259
141	kin-10	CDS	23.1686	29.1273	4.5341	4.8643
142	lap-2	CDS	40.9661	34.8327	5.35636	5.12237
143	lbp-2	CDS	40.168	43.2509	5.32797	5.43466
144	lec-2	CDS	27.1935	19.2491	4.76519	4.26672
145	let-607	5utr	16.8371	9.9145	4.07357	3.30954
146	let-70	CDS	22.438	43.7739	4.48787	5.452
147	lfi-1	CDS	21.1663	24.9545	4.4037	4.64123
148	lron-3	CDS	27.8767	7.44496	4.80099	2.89626
149	lys-8	CDS	21.261	22.3918	4.41014	4.4849
150	mak-1	5utr	7.25159	25.5344	2.8583	4.67437
151	mca-1	CDS	22.7696	13.0571	4.50904	3.70677
152	mca-3	5utr	30.4202	37.3954	4.92696	5.22479
153	mca-3	CDS	25.7121	17.2662	4.68438	4.10988
154	mev-1	CDS	23.1213	23.7948	4.53115	4.57257
155	mnk-1	5utr	22.2959	22.5419	4.47871	4.49453
156	moag-4	5utr	23.8992	28.2472	4.57889	4.82004
157	mop-25.1	CDS	36.0957	25.5344	5.17376	4.67437
158	mthf-1	CDS	18.8122	22.3918	4.2336	4.4849
159	mup-4	CDS	24.8193	9.33464	4.63339	3.22259
160	mvk-1	CDS	30.5623	28.2109	4.93368	4.81818
161	myo-2	CDS	22.0591	9.57796	4.4633	3.25972
162	ncs-2	CDS	15.3759	24.9545	3.9426	4.64123
163	ncx-2	CDS	23.4256	16.4999	4.55001	4.04439
164	ndk-1	CDS	106.542	95.2361	6.73528	6.57344
165	nduf-6	CDS	21.2136	10.9241	4.40692	3.44945
166	nduf-7	CDS	28.0188	20.2588	4.80832	4.34047
167	nhr-97	5utr	56.1051	44.1104	5.81006	5.46305
168	nlp-21	CDS	70.6829	38.3118	6.14329	5.25972
169	nlp-24	CDS	59.9677	36.3289	5.90611	5.18305
170	nlp-26	CDS	16.1266	8.17492	4.01137	3.0312
171	nlp-40	CDS	38.9436	37.9184	5.28331	5.24483
172	nlp-9	CDS	29.7843	21.4754	4.89648	4.42461
173	nmy-1	CDS	18.528	11.4676	4.21164	3.5195
174	nuo-3	CDS	17.0467	36.6291	4.09142	5.19492
175	nxf-1	CDS	20.084	26.5077	4.32797	4.72834
176	oma-2	CDS	13.2788	35.4125	3.73105	5.14619
177	pab-1	5utr	36.0957	31.54	5.17376	4.97911
178	pab-2	CDS	22.7897	22.2622	4.51031	4.47652
179	pck-1	CDS	101.671	27.7606	6.66777	4.79497
180	pdf-1	CDS	29.2432	6.28524	4.87003	2.65197
181	pkc-1	CDS	20.7199	23.572	4.37294	4.559
182	pmt-2	5utr	31.8814	37.8252	4.99464	5.24128
183	pmt-2	CDS	33.0584	38.9849	5.04695	5.28484
184	pod-1	CDS	46.0803	22.1484	5.52608	4.46913
185	pos-1	CDS	7.79274	29.5002	2.96213	4.88265
186	pqn-20	CDS	18.907	24.618	4.24084	4.62164
187	prdx-2	CDS	35.8116	32.8498	5.16235	5.03781
188	rad-23	CDS	18.6701	18.5761	4.22266	4.21537
189	ran-5	CDS	16.0793	6.34212	4.00713	2.66496
190	rap-1	5utr	15.5855	9.1482	3.96213	3.19349
191	rpa-1	CDS	39.8435	9.48474	5.31627	3.24561
192	rpl-39	CDS	38.8015	35.9924	5.27804	5.16962
193	rpn-11	CDS	5.39133	19.6789	2.43064	4.29858
194	rps-20	5utr	20.3883	27.8744	4.34967	4.80087
195	rpt-2	CDS	26.3681	38.6689	4.72072	5.2731
196	rsp-1	CDS	20.9567	19.4925	4.38934	4.28484
197	sax-7	CDS	20.3682	14.3669	4.34824	3.84468
198	sbt-1	CDS	19.8472	15.7131	4.31086	3.9739
199	sdz-24	CDS	25.8542	22.6351	4.69233	4.50049
200	sec-61	5utr	27.782	28.0039	4.79608	4.80756
201	sec-61	CDS	175.634	161.577	7.45643	7.33608
202	sipa-1	CDS	35.5546	9.33464	5.15196	3.22259
203	smd-1	5utr	59.7108	33.2795	5.89992	5.05656
204	snt-4	CDS	39.7215	24.8044	5.31185	4.63253
205	sol-1	CDS	26.091	6.77188	4.70548	2.75956
206	spc-1	CDS	14.8075	19.0627	3.88826	4.25268
207	spp-2	CDS	25.2657	21.8119	4.65911	4.44704
208	spp-3	CDS	25.4279	50.2092	4.66834	5.64988
209	spsb-1	CDS	24.6298	16.5363	4.62233	4.04756
210	srap-1	CDS	40.824	25.9847	5.35134	4.69959
211	srz-70	CDS	56.0921	46.2434	5.80972	5.53118
212	sur-7	CDS	13.9147	26.2643	3.79854	4.71503
213	taf-13	CDS	18.6701	20.1292	4.22266	4.33122
214	tax-6	5utr	21.5452	17.6597	4.42929	4.14239
215	ttr-24	CDS	20.3208	25.2911	4.34488	4.66056
216	ttr-41	CDS	27.9241	13.4505	4.80344	3.74959
217	ttr-45	CDS	21.1663	18.8194	4.4037	4.23415
218	uaf-1	CDS	22.8169	24.1313	4.51203	4.59284
219	unc-43	CDS	22.3231	19.3424	4.48047	4.27369
220	unc-52	CDS	31.435	19.4925	4.9743	4.28484
221	unc-60	CDS	25.8542	38.0685	4.69233	5.25053
222	unc-95	CDS	21.9644	8.32502	4.45709	3.05745
223	vab-10	CDS	63.8979	59.6576	5.9977	5.89863
224	vbh-1	CDS	29.737	32.0266	4.89419	5.0012
225	vha-13	CDS	85.8492	66.1657	6.42373	6.04801
226	vit-1	CDS	3.57843	34.346	1.83933	5.10207
227	xbp-1	5utr	20.5304	33.3364	4.35969	5.05903
228	zip-2	5utr	33.8092	56.6446	5.07934	5.82387
229	zip-9	CDS	21.0715	11.3175	4.39722	3.50049
230	ztf-7	CDS	30.8666	26.1711	4.94798	4.7099
