# Supplementary material for: Eukaryotic initiation factor EIF-3.G augments mRNA translation efficiency to regulate neuronal activity
Source: eLife. 2021 Jul 29;10:e68336. doi: 10.7554/eLife.68336 (PMC8354637; doi:10.7554/eLife.68336)
Supplement: Figure 4—source data 3. — Cumulative EIF-3.G(WT) and EIF-3.G(C130Y) footprint coverage per base distance from the start codon (5’UTR proximal footprints) or stop codon (3’UTR footprints) represented as reads per million. [file elife-68336-fig4-data3.xlsx]

## Sheet: Figure 4D
	WT_5UTR peaks				C130Y_5UTR peaks					WT_3UTR peaks				C130Y_3UTR peaks
	distance_from_start	read_count			distance_from_start	read_count				distance_from_start	read_count			distance_from_start	read_count
		sum				sum					sum				sum
0	-2000	0		0	-2000	0			0	-2000	0		0	-2000	0
1	-1999	0		1	-1999	0			1	-1999	0		1	-1999	0
2	-1998	0		2	-1998	0			2	-1998	0		2	-1998	0
3	-1997	0		3	-1997	0			3	-1997	0		3	-1997	0
4	-1996	0		4	-1996	0			4	-1996	0		4	-1996	0
5	-1995	0		5	-1995	0			5	-1995	0		5	-1995	0
6	-1994	0		6	-1994	0			6	-1994	0		6	-1994	0
7	-1993	0		7	-1993	0			7	-1993	0		7	-1993	0
8	-1992	0		8	-1992	0			8	-1992	0		8	-1992	0
9	-1991	0		9	-1991	0			9	-1991	0		9	-1991	0
10	-1990	0		10	-1990	0			10	-1990	0		10	-1990	0
11	-1989	0		11	-1989	0			11	-1989	0		11	-1989	0
12	-1988	0		12	-1988	0			12	-1988	0		12	-1988	0
13	-1987	0		13	-1987	0			13	-1987	0		13	-1987	0
14	-1986	0		14	-1986	0			14	-1986	0		14	-1986	0
15	-1985	0		15	-1985	0			15	-1985	0		15	-1985	0
16	-1984	0		16	-1984	0			16	-1984	0		16	-1984	0
17	-1983	0		17	-1983	0			17	-1983	0		17	-1983	0
18	-1982	0		18	-1982	0			18	-1982	0		18	-1982	0
19	-1981	0		19	-1981	0			19	-1981	0		19	-1981	0
20	-1980	0		20	-1980	0			20	-1980	0		20	-1980	0
21	-1979	0		21	-1979	0			21	-1979	0		21	-1979	0
22	-1978	0		22	-1978	0			22	-1978	0		22	-1978	0
23	-1977	0		23	-1977	0			23	-1977	0		23	-1977	0
24	-1976	0		24	-1976	0			24	-1976	0		24	-1976	0
25	-1975	0		25	-1975	0			25	-1975	0		25	-1975	0
26	-1974	0		26	-1974	0			26	-1974	0		26	-1974	0
27	-1973	0		27	-1973	0			27	-1973	0		27	-1973	0
28	-1972	0		28	-1972	0			28	-1972	0		28	-1972	0
29	-1971	0		29	-1971	0			29	-1971	0		29	-1971	0
30	-1970	0		30	-1970	0			30	-1970	0		30	-1970	0
31	-1969	0		31	-1969	0			31	-1969	0		31	-1969	0
32	-1968	0		32	-1968	0			32	-1968	0		32	-1968	0
33	-1967	0		33	-1967	0			33	-1967	0		33	-1967	0
34	-1966	0		34	-1966	0			34	-1966	0		34	-1966	0
35	-1965	0		35	-1965	0			35	-1965	0		35	-1965	0
36	-1964	0		36	-1964	0			36	-1964	0		36	-1964	0
37	-1963	0		37	-1963	0			37	-1963	0		37	-1963	0
38	-1962	0		38	-1962	0			38	-1962	0		38	-1962	0
39	-1961	0		39	-1961	0			39	-1961	0		39	-1961	0
40	-1960	0		40	-1960	0			40	-1960	0		40	-1960	0
41	-1959	0		41	-1959	0			41	-1959	0		41	-1959	0
42	-1958	0		42	-1958	0			42	-1958	0		42	-1958	0
43	-1957	0		43	-1957	0			43	-1957	0		43	-1957	0
44	-1956	0		44	-1956	0			44	-1956	0		44	-1956	0
45	-1955	0		45	-1955	0			45	-1955	0		45	-1955	0
46	-1954	0		46	-1954	0			46	-1954	0		46	-1954	0
47	-1953	0		47	-1953	0			47	-1953	0		47	-1953	0
48	-1952	0		48	-1952	0			48	-1952	0		48	-1952	0
49	-1951	0		49	-1951	0			49	-1951	0		49	-1951	0
50	-1950	0		50	-1950	0			50	-1950	0		50	-1950	0
51	-1949	0		51	-1949	0			51	-1949	0		51	-1949	0
52	-1948	0		52	-1948	0			52	-1948	0		52	-1948	0
53	-1947	0		53	-1947	0			53	-1947	0		53	-1947	0
54	-1946	0		54	-1946	0			54	-1946	0		54	-1946	0
55	-1945	0		55	-1945	0			55	-1945	0		55	-1945	0
56	-1944	0		56	-1944	0			56	-1944	0		56	-1944	0
57	-1943	0		57	-1943	0			57	-1943	0		57	-1943	0
58	-1942	0		58	-1942	0			58	-1942	0		58	-1942	0
59	-1941	0		59	-1941	0			59	-1941	0		59	-1941	0
60	-1940	0		60	-1940	0			60	-1940	0		60	-1940	0
61	-1939	0		61	-1939	0			61	-1939	0		61	-1939	0
62	-1938	0		62	-1938	0			62	-1938	0		62	-1938	0
63	-1937	0		63	-1937	0			63	-1937	0		63	-1937	0
64	-1936	0		64	-1936	0			64	-1936	0		64	-1936	0
65	-1935	0		65	-1935	0			65	-1935	0		65	-1935	0
66	-1934	0		66	-1934	0			66	-1934	0		66	-1934	0
67	-1933	0		67	-1933	0			67	-1933	0		67	-1933	0
68	-1932	0		68	-1932	0			68	-1932	0		68	-1932	0
69	-1931	0		69	-1931	0			69	-1931	0		69	-1931	0
70	-1930	0		70	-1930	0			70	-1930	0		70	-1930	0
71	-1929	0		71	-1929	0			71	-1929	0		71	-1929	0
72	-1928	0		72	-1928	0			72	-1928	0		72	-1928	0
73	-1927	0		73	-1927	0			73	-1927	0		73	-1927	0
74	-1926	0		74	-1926	0			74	-1926	0		74	-1926	0
75	-1925	0		75	-1925	0			75	-1925	0		75	-1925	0
76	-1924	0		76	-1924	0			76	-1924	0		76	-1924	0
77	-1923	0		77	-1923	0			77	-1923	0		77	-1923	0
78	-1922	0		78	-1922	0			78	-1922	0		78	-1922	0
79	-1921	0		79	-1921	0			79	-1921	0		79	-1921	0
80	-1920	0		80	-1920	0			80	-1920	0		80	-1920	0
81	-1919	0		81	-1919	0			81	-1919	0		81	-1919	0
82	-1918	0		82	-1918	0			82	-1918	0		82	-1918	0
83	-1917	0		83	-1917	0			83	-1917	0		83	-1917	0
84	-1916	0		84	-1916	0			84	-1916	0		84	-1916	0
85	-1915	0		85	-1915	0			85	-1915	0		85	-1915	0
86	-1914	0		86	-1914	0			86	-1914	0		86	-1914	0
87	-1913	0		87	-1913	0			87	-1913	0		87	-1913	0
88	-1912	0		88	-1912	0			88	-1912	0		88	-1912	0
89	-1911	0		89	-1911	0			89	-1911	0		89	-1911	0
90	-1910	0		90	-1910	0			90	-1910	0		90	-1910	0
91	-1909	0		91	-1909	0			91	-1909	0		91	-1909	0
92	-1908	0		92	-1908	0			92	-1908	0		92	-1908	0
93	-1907	0		93	-1907	0			93	-1907	0		93	-1907	0
94	-1906	0		94	-1906	0			94	-1906	0		94	-1906	0
95	-1905	0		95	-1905	0			95	-1905	0		95	-1905	0
96	-1904	0		96	-1904	0			96	-1904	0		96	-1904	0
97	-1903	0		97	-1903	0			97	-1903	0		97	-1903	0
98	-1902	0		98	-1902	0			98	-1902	0		98	-1902	0
99	-1901	0		99	-1901	0			99	-1901	0		99	-1901	0
100	-1900	0		100	-1900	0			100	-1900	0		100	-1900	0
101	-1899	0		101	-1899	0			101	-1899	0		101	-1899	0
102	-1898	0		102	-1898	0			102	-1898	0		102	-1898	0
103	-1897	0		103	-1897	0			103	-1897	0		103	-1897	0
104	-1896	0		104	-1896	0			104	-1896	0		104	-1896	0
105	-1895	0		105	-1895	0			105	-1895	0		105	-1895	0
106	-1894	0		106	-1894	0			106	-1894	0		106	-1894	0
107	-1893	0		107	-1893	0			107	-1893	0		107	-1893	0
108	-1892	0		108	-1892	0			108	-1892	0		108	-1892	0
109	-1891	0		109	-1891	0			109	-1891	0		109	-1891	0
110	-1890	0		110	-1890	0			110	-1890	0		110	-1890	0
111	-1889	0		111	-1889	0			111	-1889	0		111	-1889	0
112	-1888	0		112	-1888	0			112	-1888	0		112	-1888	0
113	-1887	0		113	-1887	0			113	-1887	0		113	-1887	0
114	-1886	0		114	-1886	0			114	-1886	0		114	-1886	0
115	-1885	0		115	-1885	0			115	-1885	0		115	-1885	0
116	-1884	0		116	-1884	0			116	-1884	0		116	-1884	0
117	-1883	0		117	-1883	0			117	-1883	0		117	-1883	0
118	-1882	0		118	-1882	0			118	-1882	0		118	-1882	0
119	-1881	0		119	-1881	0			119	-1881	0		119	-1881	0
120	-1880	0		120	-1880	0			120	-1880	0		120	-1880	0
121	-1879	0		121	-1879	0			121	-1879	0		121	-1879	0
122	-1878	0		122	-1878	0			122	-1878	0		122	-1878	0
123	-1877	0		123	-1877	0			123	-1877	0		123	-1877	0
124	-1876	0		124	-1876	0			124	-1876	0		124	-1876	0
125	-1875	0		125	-1875	0			125	-1875	0		125	-1875	0
126	-1874	0		126	-1874	0			126	-1874	0		126	-1874	0
127	-1873	0		127	-1873	0			127	-1873	0		127	-1873	0
128	-1872	0		128	-1872	0			128	-1872	0		128	-1872	0
129	-1871	0		129	-1871	0			129	-1871	0		129	-1871	0
130	-1870	0		130	-1870	0			130	-1870	0		130	-1870	0
131	-1869	0		131	-1869	0			131	-1869	0		131	-1869	0
132	-1868	0		132	-1868	0			132	-1868	0		132	-1868	0
133	-1867	0		133	-1867	0			133	-1867	0		133	-1867	0
134	-1866	0		134	-1866	0			134	-1866	0		134	-1866	0
135	-1865	0		135	-1865	0			135	-1865	0		135	-1865	0
136	-1864	0		136	-1864	0			136	-1864	0		136	-1864	0
137	-1863	0		137	-1863	0			137	-1863	0		137	-1863	0
138	-1862	0		138	-1862	0			138	-1862	0		138	-1862	0
139	-1861	0		139	-1861	0			139	-1861	0		139	-1861	0
140	-1860	0		140	-1860	0			140	-1860	0		140	-1860	0
141	-1859	0		141	-1859	0			141	-1859	0		141	-1859	0
142	-1858	0		142	-1858	0			142	-1858	0		142	-1858	0
143	-1857	0		143	-1857	0			143	-1857	0		143	-1857	0
144	-1856	0		144	-1856	0			144	-1856	0		144	-1856	0
145	-1855	0		145	-1855	0			145	-1855	0		145	-1855	0
146	-1854	0		146	-1854	0			146	-1854	0		146	-1854	0
147	-1853	0		147	-1853	0			147	-1853	0		147	-1853	0
148	-1852	0		148	-1852	0			148	-1852	0		148	-1852	0
149	-1851	0		149	-1851	0			149	-1851	0		149	-1851	0
150	-1850	0		150	-1850	0			150	-1850	0		150	-1850	0
151	-1849	0		151	-1849	0			151	-1849	0		151	-1849	0
152	-1848	0		152	-1848	0			152	-1848	0		152	-1848	0
153	-1847	0		153	-1847	0			153	-1847	0		153	-1847	0
154	-1846	0		154	-1846	0			154	-1846	0		154	-1846	0
155	-1845	0		155	-1845	0			155	-1845	0		155	-1845	0
156	-1844	0		156	-1844	0			156	-1844	0		156	-1844	0
157	-1843	0		157	-1843	0			157	-1843	0		157	-1843	0
158	-1842	0		158	-1842	0			158	-1842	0		158	-1842	0
159	-1841	0		159	-1841	0			159	-1841	0		159	-1841	0
160	-1840	0		160	-1840	0			160	-1840	0		160	-1840	0
161	-1839	0		161	-1839	0			161	-1839	0		161	-1839	0
162	-1838	0		162	-1838	0			162	-1838	0		162	-1838	0
163	-1837	0		163	-1837	0			163	-1837	0		163	-1837	0
164	-1836	0		164	-1836	0			164	-1836	0		164	-1836	0
165	-1835	0		165	-1835	0			165	-1835	0		165	-1835	0
166	-1834	0		166	-1834	0			166	-1834	0		166	-1834	0
167	-1833	0		167	-1833	0			167	-1833	0		167	-1833	0
168	-1832	0		168	-1832	0			168	-1832	0		168	-1832	0
169	-1831	0		169	-1831	0			169	-1831	0		169	-1831	0
170	-1830	0		170	-1830	0			170	-1830	0		170	-1830	0
171	-1829	0		171	-1829	0			171	-1829	0		171	-1829	0
172	-1828	0		172	-1828	0			172	-1828	0		172	-1828	0
173	-1827	0		173	-1827	0			173	-1827	0		173	-1827	0
174	-1826	0		174	-1826	0			174	-1826	0		174	-1826	0
175	-1825	0		175	-1825	0			175	-1825	0		175	-1825	0
176	-1824	0		176	-1824	0			176	-1824	0		176	-1824	0
177	-1823	0		177	-1823	0			177	-1823	0		177	-1823	0
178	-1822	0		178	-1822	0			178	-1822	0		178	-1822	0
179	-1821	0		179	-1821	0			179	-1821	0		179	-1821	0
180	-1820	0		180	-1820	0			180	-1820	0		180	-1820	0
181	-1819	0		181	-1819	0			181	-1819	0		181	-1819	0
182	-1818	0		182	-1818	0			182	-1818	0		182	-1818	0
183	-1817	0		183	-1817	0			183	-1817	0		183	-1817	0
184	-1816	0		184	-1816	0			184	-1816	0		184	-1816	0
185	-1815	0		185	-1815	0			185	-1815	0		185	-1815	0
186	-1814	0		186	-1814	0			186	-1814	0		186	-1814	0
187	-1813	0		187	-1813	0			187	-1813	0		187	-1813	0
188	-1812	0		188	-1812	0			188	-1812	0		188	-1812	0
189	-1811	0		189	-1811	0			189	-1811	0		189	-1811	0
190	-1810	0		190	-1810	0			190	-1810	0		190	-1810	0
191	-1809	0		191	-1809	0			191	-1809	0		191	-1809	0
192	-1808	0		192	-1808	0			192	-1808	0		192	-1808	0
193	-1807	0		193	-1807	0			193	-1807	0		193	-1807	0
194	-1806	0		194	-1806	0			194	-1806	0		194	-1806	0
195	-1805	0		195	-1805	0			195	-1805	0		195	-1805	0
196	-1804	0		196	-1804	0			196	-1804	0		196	-1804	0
197	-1803	0		197	-1803	0			197	-1803	0		197	-1803	0
198	-1802	0		198	-1802	0			198	-1802	0		198	-1802	0
199	-1801	0		199	-1801	0			199	-1801	0		199	-1801	0
200	-1800	0		200	-1800	0			200	-1800	0		200	-1800	0
201	-1799	0		201	-1799	0			201	-1799	0		201	-1799	0
202	-1798	0		202	-1798	0			202	-1798	0		202	-1798	0
203	-1797	0		203	-1797	0			203	-1797	0		203	-1797	0
204	-1796	0		204	-1796	0			204	-1796	0		204	-1796	0
205	-1795	0		205	-1795	0			205	-1795	0		205	-1795	0
206	-1794	0		206	-1794	0			206	-1794	0		206	-1794	0
207	-1793	0		207	-1793	0			207	-1793	0		207	-1793	0
208	-1792	0		208	-1792	0			208	-1792	0		208	-1792	0
209	-1791	0		209	-1791	0			209	-1791	0		209	-1791	0
210	-1790	0		210	-1790	0			210	-1790	0		210	-1790	0
211	-1789	0		211	-1789	0			211	-1789	0		211	-1789	0
212	-1788	0		212	-1788	0			212	-1788	0		212	-1788	0
213	-1787	0		213	-1787	0			213	-1787	0		213	-1787	0
214	-1786	0		214	-1786	0			214	-1786	0		214	-1786	0
215	-1785	0		215	-1785	0			215	-1785	0		215	-1785	0
216	-1784	0		216	-1784	0			216	-1784	0		216	-1784	0
217	-1783	0		217	-1783	0			217	-1783	0		217	-1783	0
218	-1782	0		218	-1782	0			218	-1782	0		218	-1782	0
219	-1781	0		219	-1781	0			219	-1781	0		219	-1781	0
220	-1780	0		220	-1780	0			220	-1780	0		220	-1780	0
221	-1779	0		221	-1779	0			221	-1779	0		221	-1779	0
222	-1778	0		222	-1778	0			222	-1778	0		222	-1778	0
223	-1777	0		223	-1777	0			223	-1777	0		223	-1777	0
224	-1776	0		224	-1776	0			224	-1776	0		224	-1776	0
225	-1775	0		225	-1775	0			225	-1775	0		225	-1775	0
226	-1774	0		226	-1774	0			226	-1774	0		226	-1774	0
227	-1773	0		227	-1773	0			227	-1773	0		227	-1773	0
228	-1772	0		228	-1772	0			228	-1772	0		228	-1772	0
229	-1771	0		229	-1771	0			229	-1771	0		229	-1771	0
230	-1770	0		230	-1770	0			230	-1770	0		230	-1770	0
231	-1769	0		231	-1769	0			231	-1769	0		231	-1769	0
232	-1768	0		232	-1768	0			232	-1768	0		232	-1768	0
233	-1767	0		233	-1767	0			233	-1767	0		233	-1767	0
234	-1766	0		234	-1766	0			234	-1766	0		234	-1766	0
235	-1765	0		235	-1765	0			235	-1765	0		235	-1765	0
236	-1764	0		236	-1764	0			236	-1764	0		236	-1764	0
237	-1763	0		237	-1763	0			237	-1763	0		237	-1763	0
238	-1762	0		238	-1762	0			238	-1762	0		238	-1762	0
239	-1761	0		239	-1761	0			239	-1761	0		239	-1761	0
240	-1760	0		240	-1760	0			240	-1760	0		240	-1760	0
241	-1759	0		241	-1759	0			241	-1759	0		241	-1759	0
242	-1758	0		242	-1758	0			242	-1758	0		242	-1758	0
243	-1757	0		243	-1757	0			243	-1757	0		243	-1757	0
244	-1756	0		244	-1756	0			244	-1756	0		244	-1756	0
245	-1755	0		245	-1755	0			245	-1755	0		245	-1755	0
246	-1754	0		246	-1754	0			246	-1754	0		246	-1754	0
247	-1753	0		247	-1753	0			247	-1753	0		247	-1753	0
248	-1752	0		248	-1752	0			248	-1752	0		248	-1752	0
249	-1751	0		249	-1751	0			249	-1751	0		249	-1751	0
250	-1750	0		250	-1750	0			250	-1750	0		250	-1750	0
251	-1749	0		251	-1749	0			251	-1749	0		251	-1749	0
252	-1748	0		252	-1748	0			252	-1748	0		252	-1748	0
253	-1747	0		253	-1747	0			253	-1747	0		253	-1747	0
254	-1746	0		254	-1746	0			254	-1746	0		254	-1746	0
255	-1745	0		255	-1745	0			255	-1745	0		255	-1745	0
256	-1744	0		256	-1744	0			256	-1744	0		256	-1744	0
257	-1743	0		257	-1743	0			257	-1743	0		257	-1743	0
258	-1742	0		258	-1742	0			258	-1742	0		258	-1742	0
259	-1741	0		259	-1741	0			259	-1741	0		259	-1741	0
260	-1740	0		260	-1740	0			260	-1740	0		260	-1740	0
261	-1739	0		261	-1739	0			261	-1739	0		261	-1739	0
262	-1738	0		262	-1738	0			262	-1738	0		262	-1738	0
263	-1737	0		263	-1737	0			263	-1737	0		263	-1737	0
264	-1736	0		264	-1736	0			264	-1736	0		264	-1736	0
265	-1735	0		265	-1735	0			265	-1735	0		265	-1735	0
266	-1734	0		266	-1734	0			266	-1734	0		266	-1734	0
267	-1733	0		267	-1733	0			267	-1733	0		267	-1733	0
268	-1732	0		268	-1732	0			268	-1732	0		268	-1732	0
269	-1731	0		269	-1731	0			269	-1731	0		269	-1731	0
270	-1730	0		270	-1730	0			270	-1730	0		270	-1730	0
271	-1729	0		271	-1729	0			271	-1729	0		271	-1729	0
272	-1728	0		272	-1728	0			272	-1728	0		272	-1728	0
273	-1727	0		273	-1727	0			273	-1727	0		273	-1727	0
274	-1726	0		274	-1726	0			274	-1726	0		274	-1726	0
275	-1725	0		275	-1725	0			275	-1725	0		275	-1725	0
276	-1724	0		276	-1724	0			276	-1724	0		276	-1724	0
277	-1723	0		277	-1723	0			277	-1723	0		277	-1723	0
278	-1722	0		278	-1722	0			278	-1722	0		278	-1722	0
279	-1721	0		279	-1721	0			279	-1721	0		279	-1721	0
280	-1720	0		280	-1720	0			280	-1720	0		280	-1720	0
281	-1719	0		281	-1719	0			281	-1719	0		281	-1719	0
282	-1718	0		282	-1718	0			282	-1718	0		282	-1718	0
283	-1717	0		283	-1717	0			283	-1717	0		283	-1717	0
284	-1716	0		284	-1716	0			284	-1716	0		284	-1716	0
285	-1715	0		285	-1715	0			285	-1715	0		285	-1715	0
286	-1714	0		286	-1714	0			286	-1714	0		286	-1714	0
287	-1713	0		287	-1713	0			287	-1713	0		287	-1713	0
288	-1712	0		288	-1712	0			288	-1712	0		288	-1712	0
289	-1711	0		289	-1711	0			289	-1711	0		289	-1711	0
290	-1710	0		290	-1710	0			290	-1710	0		290	-1710	0
291	-1709	0		291	-1709	0			291	-1709	0		291	-1709	0
292	-1708	0		292	-1708	0			292	-1708	0		292	-1708	0
293	-1707	0		293	-1707	0			293	-1707	0		293	-1707	0
294	-1706	0		294	-1706	0			294	-1706	0		294	-1706	0
295	-1705	0		295	-1705	0			295	-1705	0		295	-1705	0
296	-1704	0		296	-1704	0			296	-1704	0		296	-1704	0
297	-1703	0		297	-1703	0			297	-1703	0		297	-1703	0
298	-1702	0		298	-1702	0			298	-1702	0		298	-1702	0
299	-1701	0		299	-1701	0			299	-1701	0		299	-1701	0
300	-1700	0		300	-1700	0			300	-1700	0		300	-1700	0
301	-1699	0		301	-1699	0			301	-1699	0		301	-1699	0
302	-1698	0		302	-1698	0			302	-1698	0		302	-1698	0
303	-1697	0		303	-1697	0			303	-1697	0		303	-1697	0
304	-1696	0		304	-1696	0			304	-1696	0		304	-1696	0
305	-1695	0		305	-1695	0			305	-1695	0		305	-1695	0
306	-1694	0		306	-1694	0			306	-1694	0		306	-1694	0
307	-1693	0		307	-1693	0			307	-1693	0		307	-1693	0
308	-1692	0		308	-1692	0			308	-1692	0		308	-1692	0
309	-1691	0		309	-1691	0			309	-1691	0		309	-1691	0
310	-1690	0		310	-1690	0			310	-1690	0		310	-1690	0
311	-1689	0		311	-1689	0			311	-1689	0		311	-1689	0
312	-1688	0		312	-1688	0			312	-1688	0		312	-1688	0
313	-1687	0		313	-1687	0			313	-1687	0		313	-1687	0
314	-1686	0		314	-1686	0			314	-1686	0		314	-1686	0
315	-1685	0		315	-1685	0			315	-1685	0		315	-1685	0
316	-1684	0		316	-1684	0			316	-1684	0		316	-1684	0
317	-1683	0		317	-1683	0			317	-1683	0		317	-1683	0
318	-1682	0		318	-1682	0			318	-1682	0		318	-1682	0
319	-1681	0		319	-1681	0			319	-1681	0		319	-1681	0
320	-1680	0		320	-1680	0			320	-1680	0		320	-1680	0
321	-1679	0		321	-1679	0			321	-1679	0		321	-1679	0
322	-1678	0		322	-1678	0			322	-1678	0		322	-1678	0
323	-1677	0		323	-1677	0			323	-1677	0		323	-1677	0
324	-1676	0		324	-1676	0			324	-1676	0		324	-1676	0
325	-1675	0		325	-1675	0			325	-1675	0		325	-1675	0
326	-1674	0		326	-1674	0			326	-1674	0		326	-1674	0
327	-1673	0		327	-1673	0			327	-1673	0		327	-1673	0
328	-1672	0		328	-1672	0			328	-1672	0		328	-1672	0
329	-1671	0		329	-1671	0			329	-1671	0		329	-1671	0
330	-1670	0		330	-1670	0			330	-1670	0		330	-1670	0
331	-1669	0		331	-1669	0			331	-1669	0		331	-1669	0
332	-1668	0		332	-1668	0			332	-1668	0		332	-1668	0
333	-1667	0		333	-1667	0			333	-1667	0		333	-1667	0
334	-1666	0		334	-1666	0			334	-1666	0		334	-1666	0
335	-1665	0		335	-1665	0			335	-1665	0		335	-1665	0
336	-1664	0		336	-1664	0			336	-1664	0		336	-1664	0
337	-1663	0		337	-1663	0			337	-1663	0		337	-1663	0
338	-1662	0		338	-1662	0			338	-1662	0		338	-1662	0
339	-1661	0		339	-1661	0			339	-1661	0		339	-1661	0
340	-1660	0		340	-1660	0			340	-1660	0		340	-1660	0
341	-1659	0		341	-1659	0			341	-1659	0		341	-1659	0
342	-1658	0		342	-1658	0			342	-1658	0		342	-1658	0
343	-1657	0		343	-1657	0			343	-1657	0		343	-1657	0
344	-1656	0		344	-1656	0			344	-1656	0		344	-1656	0
345	-1655	0		345	-1655	0			345	-1655	0		345	-1655	0
346	-1654	0		346	-1654	0			346	-1654	0		346	-1654	0
347	-1653	0		347	-1653	0			347	-1653	0		347	-1653	0
348	-1652	0		348	-1652	0			348	-1652	0		348	-1652	0
349	-1651	0		349	-1651	0			349	-1651	0		349	-1651	0
350	-1650	0		350	-1650	0			350	-1650	0		350	-1650	0
351	-1649	0		351	-1649	0			351	-1649	0		351	-1649	0
352	-1648	0		352	-1648	0			352	-1648	0		352	-1648	0
353	-1647	0		353	-1647	0			353	-1647	0		353	-1647	0
354	-1646	0		354	-1646	0			354	-1646	0		354	-1646	0
355	-1645	0		355	-1645	0			355	-1645	0		355	-1645	0
356	-1644	0		356	-1644	0			356	-1644	0		356	-1644	0
357	-1643	0		357	-1643	0			357	-1643	0		357	-1643	0
358	-1642	0		358	-1642	0			358	-1642	0		358	-1642	0
359	-1641	0		359	-1641	0			359	-1641	0		359	-1641	0
360	-1640	0		360	-1640	0			360	-1640	0		360	-1640	0
361	-1639	0		361	-1639	0			361	-1639	0		361	-1639	0
362	-1638	0		362	-1638	0			362	-1638	0		362	-1638	0
363	-1637	0		363	-1637	0			363	-1637	0		363	-1637	0
364	-1636	0		364	-1636	0			364	-1636	0		364	-1636	0
365	-1635	0		365	-1635	0			365	-1635	0		365	-1635	0
366	-1634	0		366	-1634	0			366	-1634	0		366	-1634	0
367	-1633	0		367	-1633	0			367	-1633	0		367	-1633	0
368	-1632	0		368	-1632	0			368	-1632	0		368	-1632	0
369	-1631	0		369	-1631	0			369	-1631	0		369	-1631	0
370	-1630	0		370	-1630	0			370	-1630	0		370	-1630	0
371	-1629	0		371	-1629	0			371	-1629	0		371	-1629	0
372	-1628	0		372	-1628	0			372	-1628	0		372	-1628	0
373	-1627	0		373	-1627	0			373	-1627	0		373	-1627	0
374	-1626	0		374	-1626	0			374	-1626	0		374	-1626	0
375	-1625	0		375	-1625	0			375	-1625	0		375	-1625	0
376	-1624	0		376	-1624	0			376	-1624	0		376	-1624	0
377	-1623	0		377	-1623	0			377	-1623	0		377	-1623	0
378	-1622	0		378	-1622	0			378	-1622	0		378	-1622	0
379	-1621	0		379	-1621	0			379	-1621	0		379	-1621	0
380	-1620	0		380	-1620	0			380	-1620	0		380	-1620	0
381	-1619	1.8129		381	-1619	0.823179			381	-1619	0		381	-1619	0
382	-1618	7.69801		382	-1618	6.0988			382	-1618	0		382	-1618	0
383	-1617	7.69801		383	-1617	6.92198			383	-1617	0		383	-1617	0
384	-1616	7.69801		384	-1616	6.0988			384	-1616	0		384	-1616	0
385	-1615	8.33389		385	-1615	6.92198			385	-1615	0		385	-1615	0
386	-1614	8.33389		386	-1614	6.92198			386	-1614	0		386	-1614	0
387	-1613	8.9224		387	-1613	6.92198			387	-1613	0		387	-1613	0
388	-1612	9.55828		388	-1612	6.92198			388	-1612	0		388	-1612	0
389	-1611	9.55828		389	-1611	5.51894			389	-1611	0		389	-1611	0
390	-1610	9.55828		390	-1610	7.1653			390	-1610	0		390	-1610	0
391	-1609	9.55828		391	-1609	7.1653			391	-1609	0		391	-1609	0
392	-1608	9.55828		392	-1608	7.1653			392	-1608	0		392	-1608	0
393	-1607	11.3712		393	-1607	7.1653			393	-1607	0		393	-1607	0
394	-1606	26.8418		394	-1606	7.74516			394	-1606	0		394	-1606	0
395	-1605	28.702		395	-1605	7.74516			395	-1605	0		395	-1605	0
396	-1604	31.1508		396	-1604	8.0817			396	-1604	0		396	-1604	0
397	-1603	32.4226		397	-1603	8.0817			397	-1603	0		397	-1603	0
398	-1602	32.4226		398	-1602	8.90488			398	-1602	0		398	-1602	0
399	-1601	31.8341		399	-1601	8.0817			399	-1601	0		399	-1601	0
400	-1600	29.9738		400	-1600	8.66156			400	-1600	0		400	-1600	0
401	-1599	31.7867		401	-1599	9.48474			401	-1599	0		401	-1599	0
402	-1598	33.0111		402	-1598	9.24142			402	-1598	0		402	-1598	0
403	-1597	33.5996		403	-1597	10.4011			403	-1597	0		403	-1597	0
404	-1596	33.5522		404	-1596	11.2243			404	-1596	0		404	-1596	0
405	-1595	33.5996		405	-1595	11.2243			405	-1595	0		405	-1595	0
406	-1594	33.647		406	-1594	11.2243			406	-1594	0		406	-1594	0
407	-1593	33.5996		407	-1593	11.2243			407	-1593	0		407	-1593	0
408	-1592	34.2355		408	-1592	11.2243			408	-1592	0		408	-1592	0
409	-1591	33.0584		409	-1591	11.2243			409	-1591	0		409	-1591	0
410	-1590	32.9637		410	-1590	12.0475			410	-1590	0		410	-1590	0
411	-1589	33.5522		411	-1589	12.6274			411	-1589	0		411	-1589	0
412	-1588	32.9637		412	-1588	11.2243			412	-1588	0		412	-1588	0
413	-1587	31.1508		413	-1587	11.8042			413	-1587	0		413	-1587	0
414	-1586	29.9264		414	-1586	10.4011			414	-1586	0		414	-1586	0
415	-1585	28.1135		415	-1585	10.981			415	-1585	0		415	-1585	0
416	-1584	24.9815		416	-1584	10.981			416	-1584	0		416	-1584	0
417	-1583	24.9815		417	-1583	11.2243			417	-1583	0		417	-1583	0
418	-1582	24.2983		418	-1582	11.2243			418	-1582	0		418	-1582	0
419	-1581	24.3456		419	-1581	10.981			419	-1581	0		419	-1581	0
420	-1580	23.7098		420	-1580	10.981			420	-1580	0		420	-1580	0
421	-1579	24.3456		421	-1579	10.981			421	-1579	0		421	-1579	0
422	-1578	24.3456		422	-1578	10.981			422	-1578	0		422	-1578	0
423	-1577	23.0739		423	-1577	10.981			423	-1577	0		423	-1577	0
424	-1576	24.2983		424	-1576	10.4011			424	-1576	0		424	-1576	0
425	-1575	23.6624		425	-1575	10.981			425	-1575	0		425	-1575	0
426	-1574	19.8472		426	-1574	10.981			426	-1574	0		426	-1574	0
427	-1573	17.9869		427	-1573	10.981			427	-1573	0		427	-1573	0
428	-1572	16.0793		428	-1572	10.4011			428	-1572	0		428	-1572	0
429	-1571	15.4434		429	-1571	8.41824			429	-1571	0		429	-1571	0
430	-1570	1.76553		430	-1570	3.9658			430	-1570	0		430	-1570	0
431	-1569	1.76553		431	-1569	3.9658			431	-1569	0		431	-1569	0
432	-1568	1.76553		432	-1568	3.38594			432	-1568	0		432	-1568	0
433	-1567	2.35405		433	-1567	3.38594			433	-1567	0		433	-1567	0
434	-1566	2.35405		434	-1566	3.38594			434	-1566	0		434	-1566	0
435	-1565	2.35405		435	-1565	3.38594			435	-1565	0		435	-1565	0
436	-1564	2.35405		436	-1564	3.38594			436	-1564	0		436	-1564	0
437	-1563	2.35405		437	-1563	3.38594			437	-1563	0		437	-1563	0
438	-1562	2.35405		438	-1562	3.38594			438	-1562	0		438	-1562	0
439	-1561	2.35405		439	-1561	3.38594			439	-1561	0		439	-1561	0
440	-1560	2.35405		440	-1560	3.38594			440	-1560	0		440	-1560	0
441	-1559	2.35405		441	-1559	3.38594			441	-1559	0		441	-1559	0
442	-1558	2.35405		442	-1558	3.38594			442	-1558	0		442	-1558	0
443	-1557	2.35405		443	-1557	3.38594			443	-1557	0		443	-1557	0
444	-1556	2.35405		444	-1556	3.38594			444	-1556	0		444	-1556	0
445	-1555	2.35405		445	-1555	3.38594			445	-1555	0		445	-1555	0
446	-1554	2.35405		446	-1554	3.38594			446	-1554	0		446	-1554	0
447	-1553	2.35405		447	-1553	3.38594			447	-1553	0		447	-1553	0
448	-1552	2.35405		448	-1552	3.38594			448	-1552	0		448	-1552	0
449	-1551	2.35405		449	-1551	3.38594			449	-1551	0		449	-1551	0
450	-1550	2.35405		450	-1550	3.38594			450	-1550	0		450	-1550	0
451	-1549	2.35405		451	-1549	3.38594			451	-1549	0		451	-1549	0
452	-1548	2.35405		452	-1548	3.38594			452	-1548	0		452	-1548	0
453	-1547	2.35405		453	-1547	3.38594			453	-1547	0		453	-1547	0
454	-1546	2.35405		454	-1546	3.38594			454	-1546	0		454	-1546	0
455	-1545	2.35405		455	-1545	3.38594			455	-1545	0		455	-1545	0
456	-1544	2.35405		456	-1544	3.38594			456	-1544	0		456	-1544	0
457	-1543	2.35405		457	-1543	3.38594			457	-1543	0		457	-1543	0
458	-1542	2.35405		458	-1542	3.38594			458	-1542	0		458	-1542	0
459	-1541	2.35405		459	-1541	3.38594			459	-1541	0		459	-1541	0
460	-1540	2.35405		460	-1540	3.38594			460	-1540	0		460	-1540	0
461	-1539	2.35405		461	-1539	3.38594			461	-1539	0		461	-1539	0
462	-1538	2.35405		462	-1538	3.38594			462	-1538	0		462	-1538	0
463	-1537	2.35405		463	-1537	3.38594			463	-1537	0		463	-1537	0
464	-1536	2.35405		464	-1536	3.38594			464	-1536	0		464	-1536	0
465	-1535	2.35405		465	-1535	3.38594			465	-1535	0		465	-1535	0
466	-1534	2.35405		466	-1534	3.38594			466	-1534	0		466	-1534	0
467	-1533	2.35405		467	-1533	3.38594			467	-1533	0		467	-1533	0
468	-1532	2.35405		468	-1532	3.38594			468	-1532	0		468	-1532	0
469	-1531	2.35405		469	-1531	3.38594			469	-1531	0		469	-1531	0
470	-1530	2.35405		470	-1530	3.38594			470	-1530	0		470	-1530	0
471	-1529	2.35405		471	-1529	3.38594			471	-1529	0		471	-1529	0
472	-1528	2.35405		472	-1528	3.38594			472	-1528	0		472	-1528	0
473	-1527	2.35405		473	-1527	3.38594			473	-1527	0		473	-1527	0
474	-1526	2.35405		474	-1526	3.38594			474	-1526	0		474	-1526	0
475	-1525	2.35405		475	-1525	3.38594			475	-1525	0		475	-1525	0
476	-1524	2.35405		476	-1524	3.38594			476	-1524	0		476	-1524	0
477	-1523	2.35405		477	-1523	3.38594			477	-1523	0		477	-1523	0
478	-1522	2.35405		478	-1522	3.38594			478	-1522	0		478	-1522	0
479	-1521	2.35405		479	-1521	3.38594			479	-1521	0		479	-1521	0
480	-1520	2.35405		480	-1520	3.38594			480	-1520	0		480	-1520	0
481	-1519	2.35405		481	-1519	3.38594			481	-1519	0		481	-1519	0
482	-1518	2.35405		482	-1518	3.38594			482	-1518	0		482	-1518	0
483	-1517	2.35405		483	-1517	3.38594			483	-1517	0		483	-1517	0
484	-1516	2.35405		484	-1516	3.38594			484	-1516	0		484	-1516	0
485	-1515	2.35405		485	-1515	3.38594			485	-1515	0		485	-1515	0
486	-1514	2.35405		486	-1514	3.38594			486	-1514	0		486	-1514	0
487	-1513	2.35405		487	-1513	3.38594			487	-1513	0		487	-1513	0
488	-1512	2.35405		488	-1512	3.38594			488	-1512	0		488	-1512	0
489	-1511	2.35405		489	-1511	3.38594			489	-1511	0		489	-1511	0
490	-1510	2.35405		490	-1510	3.38594			490	-1510	0		490	-1510	0
491	-1509	2.35405		491	-1509	3.38594			491	-1509	0		491	-1509	0
492	-1508	2.35405		492	-1508	3.38594			492	-1508	0		492	-1508	0
493	-1507	2.35405		493	-1507	3.38594			493	-1507	0		493	-1507	0
494	-1506	2.35405		494	-1506	3.38594			494	-1506	0		494	-1506	0
495	-1505	2.35405		495	-1505	3.38594			495	-1505	0		495	-1505	0
496	-1504	2.35405		496	-1504	3.38594			496	-1504	0		496	-1504	0
497	-1503	2.35405		497	-1503	3.38594			497	-1503	0		497	-1503	0
498	-1502	2.35405		498	-1502	3.38594			498	-1502	0		498	-1502	0
499	-1501	2.35405		499	-1501	3.38594			499	-1501	0		499	-1501	0
500	-1500	2.35405		500	-1500	3.38594			500	-1500	0		500	-1500	0
501	-1499	2.35405		501	-1499	3.38594			501	-1499	0		501	-1499	0
502	-1498	2.35405		502	-1498	3.38594			502	-1498	0		502	-1498	0
503	-1497	2.35405		503	-1497	3.38594			503	-1497	0		503	-1497	0
504	-1496	2.35405		504	-1496	3.38594			504	-1496	0		504	-1496	0
505	-1495	2.35405		505	-1495	3.38594			505	-1495	0		505	-1495	0
506	-1494	2.35405		506	-1494	3.38594			506	-1494	0		506	-1494	0
507	-1493	2.35405		507	-1493	3.38594			507	-1493	0		507	-1493	0
508	-1492	2.35405		508	-1492	3.38594			508	-1492	0		508	-1492	0
509	-1491	2.35405		509	-1491	3.38594			509	-1491	0		509	-1491	0
510	-1490	2.35405		510	-1490	3.38594			510	-1490	0		510	-1490	0
511	-1489	2.35405		511	-1489	3.38594			511	-1489	0		511	-1489	0
512	-1488	2.35405		512	-1488	3.38594			512	-1488	0		512	-1488	0
513	-1487	2.35405		513	-1487	3.38594			513	-1487	0		513	-1487	0
514	-1486	2.35405		514	-1486	3.38594			514	-1486	0		514	-1486	0
515	-1485	2.35405		515	-1485	3.38594			515	-1485	0		515	-1485	0
516	-1484	2.35405		516	-1484	3.38594			516	-1484	0		516	-1484	0
517	-1483	2.35405		517	-1483	3.38594			517	-1483	0		517	-1483	0
518	-1482	2.35405		518	-1482	3.38594			518	-1482	0		518	-1482	0
519	-1481	2.35405		519	-1481	3.38594			519	-1481	0		519	-1481	0
520	-1480	2.35405		520	-1480	3.38594			520	-1480	0		520	-1480	0
521	-1479	2.35405		521	-1479	3.38594			521	-1479	0		521	-1479	0
522	-1478	2.35405		522	-1478	3.38594			522	-1478	0		522	-1478	0
523	-1477	2.35405		523	-1477	3.38594			523	-1477	0		523	-1477	0
524	-1476	2.35405		524	-1476	3.38594			524	-1476	0		524	-1476	0
525	-1475	2.35405		525	-1475	3.38594			525	-1475	0		525	-1475	0
526	-1474	2.35405		526	-1474	3.38594			526	-1474	0		526	-1474	0
527	-1473	2.35405		527	-1473	3.38594			527	-1473	0		527	-1473	0
528	-1472	2.35405		528	-1472	3.38594			528	-1472	0		528	-1472	0
529	-1471	2.35405		529	-1471	3.38594			529	-1471	0		529	-1471	0
530	-1470	2.35405		530	-1470	3.38594			530	-1470	0		530	-1470	0
531	-1469	2.35405		531	-1469	3.38594			531	-1469	0		531	-1469	0
532	-1468	2.35405		532	-1468	3.38594			532	-1468	0		532	-1468	0
533	-1467	2.35405		533	-1467	3.38594			533	-1467	0		533	-1467	0
534	-1466	2.35405		534	-1466	3.38594			534	-1466	0		534	-1466	0
535	-1465	2.35405		535	-1465	3.38594			535	-1465	0		535	-1465	0
536	-1464	2.35405		536	-1464	3.38594			536	-1464	0		536	-1464	0
537	-1463	2.35405		537	-1463	3.38594			537	-1463	0		537	-1463	0
538	-1462	2.35405		538	-1462	3.38594			538	-1462	0		538	-1462	0
539	-1461	2.35405		539	-1461	3.38594			539	-1461	0		539	-1461	0
540	-1460	2.35405		540	-1460	3.38594			540	-1460	0		540	-1460	0
541	-1459	2.35405		541	-1459	3.38594			541	-1459	0		541	-1459	0
542	-1458	2.35405		542	-1458	3.38594			542	-1458	0		542	-1458	0
543	-1457	2.35405		543	-1457	3.38594			543	-1457	0		543	-1457	0
544	-1456	2.35405		544	-1456	3.38594			544	-1456	0		544	-1456	0
545	-1455	2.35405		545	-1455	3.38594			545	-1455	0		545	-1455	0
546	-1454	2.35405		546	-1454	3.38594			546	-1454	0		546	-1454	0
547	-1453	2.35405		547	-1453	3.38594			547	-1453	0		547	-1453	0
548	-1452	2.35405		548	-1452	3.38594			548	-1452	0		548	-1452	0
549	-1451	2.35405		549	-1451	3.38594			549	-1451	0		549	-1451	0
550	-1450	2.35405		550	-1450	3.38594			550	-1450	0		550	-1450	0
551	-1449	2.35405		551	-1449	3.38594			551	-1449	0		551	-1449	0
552	-1448	2.35405		552	-1448	3.38594			552	-1448	0		552	-1448	0
553	-1447	2.35405		553	-1447	3.38594			553	-1447	0		553	-1447	0
554	-1446	2.35405		554	-1446	3.38594			554	-1446	0		554	-1446	0
555	-1445	2.35405		555	-1445	3.38594			555	-1445	0		555	-1445	0
556	-1444	2.35405		556	-1444	3.38594			556	-1444	0		556	-1444	0
557	-1443	2.35405		557	-1443	3.38594			557	-1443	0		557	-1443	0
558	-1442	2.35405		558	-1442	3.38594			558	-1442	0		558	-1442	0
559	-1441	2.35405		559	-1441	3.38594			559	-1441	0		559	-1441	0
560	-1440	2.35405		560	-1440	3.38594			560	-1440	0		560	-1440	0
561	-1439	2.35405		561	-1439	3.38594			561	-1439	0		561	-1439	0
562	-1438	2.35405		562	-1438	3.38594			562	-1438	0		562	-1438	0
563	-1437	2.35405		563	-1437	3.38594			563	-1437	0		563	-1437	0
564	-1436	2.35405		564	-1436	3.38594			564	-1436	0		564	-1436	0
565	-1435	2.35405		565	-1435	3.38594			565	-1435	0		565	-1435	0
566	-1434	2.35405		566	-1434	3.38594			566	-1434	0		566	-1434	0
567	-1433	2.35405		567	-1433	3.38594			567	-1433	0		567	-1433	0
568	-1432	2.35405		568	-1432	3.38594			568	-1432	0		568	-1432	0
569	-1431	2.35405		569	-1431	3.38594			569	-1431	0		569	-1431	0
570	-1430	2.35405		570	-1430	3.38594			570	-1430	0		570	-1430	0
571	-1429	2.35405		571	-1429	3.38594			571	-1429	0		571	-1429	0
572	-1428	2.35405		572	-1428	3.38594			572	-1428	0		572	-1428	0
573	-1427	2.35405		573	-1427	3.38594			573	-1427	0		573	-1427	0
574	-1426	2.35405		574	-1426	3.38594			574	-1426	0		574	-1426	0
575	-1425	2.35405		575	-1425	3.38594			575	-1425	0		575	-1425	0
576	-1424	2.35405		576	-1424	3.38594			576	-1424	0		576	-1424	0
577	-1423	2.35405		577	-1423	3.38594			577	-1423	0		577	-1423	0
578	-1422	2.35405		578	-1422	3.38594			578	-1422	0		578	-1422	0
579	-1421	2.35405		579	-1421	3.38594			579	-1421	0		579	-1421	0
580	-1420	2.35405		580	-1420	3.38594			580	-1420	0		580	-1420	0
581	-1419	2.35405		581	-1419	3.38594			581	-1419	0		581	-1419	0
582	-1418	2.35405		582	-1418	3.38594			582	-1418	0		582	-1418	0
583	-1417	2.35405		583	-1417	3.38594			583	-1417	0		583	-1417	0
584	-1416	2.35405		584	-1416	3.38594			584	-1416	0		584	-1416	0
585	-1415	2.35405		585	-1415	3.38594			585	-1415	0		585	-1415	0
586	-1414	2.35405		586	-1414	3.38594			586	-1414	0		586	-1414	0
587	-1413	2.35405		587	-1413	3.38594			587	-1413	0		587	-1413	0
588	-1412	2.35405		588	-1412	3.38594			588	-1412	0		588	-1412	0
589	-1411	2.35405		589	-1411	3.38594			589	-1411	0		589	-1411	0
590	-1410	2.35405		590	-1410	3.38594			590	-1410	0		590	-1410	0
591	-1409	2.35405		591	-1409	3.38594			591	-1409	0		591	-1409	0
592	-1408	2.35405		592	-1408	3.38594			592	-1408	0		592	-1408	0
593	-1407	2.35405		593	-1407	3.38594			593	-1407	0		593	-1407	0
594	-1406	2.35405		594	-1406	3.38594			594	-1406	0		594	-1406	0
595	-1405	2.35405		595	-1405	3.38594			595	-1405	0		595	-1405	0
596	-1404	2.35405		596	-1404	3.38594			596	-1404	0		596	-1404	0
597	-1403	2.35405		597	-1403	3.38594			597	-1403	0		597	-1403	0
598	-1402	2.35405		598	-1402	3.38594			598	-1402	0		598	-1402	0
599	-1401	2.35405		599	-1401	3.38594			599	-1401	0		599	-1401	0
600	-1400	2.35405		600	-1400	3.38594			600	-1400	0		600	-1400	0
601	-1399	2.35405		601	-1399	3.38594			601	-1399	0		601	-1399	0
602	-1398	2.35405		602	-1398	3.38594			602	-1398	0		602	-1398	0
603	-1397	2.35405		603	-1397	3.38594			603	-1397	0		603	-1397	0
604	-1396	2.35405		604	-1396	3.38594			604	-1396	0		604	-1396	0
605	-1395	2.35405		605	-1395	3.38594			605	-1395	0		605	-1395	0
606	-1394	2.35405		606	-1394	3.38594			606	-1394	0		606	-1394	0
607	-1393	2.35405		607	-1393	3.38594			607	-1393	0		607	-1393	0
608	-1392	2.35405		608	-1392	3.38594			608	-1392	0		608	-1392	0
609	-1391	2.35405		609	-1391	3.38594			609	-1391	0		609	-1391	0
610	-1390	2.35405		610	-1390	3.38594			610	-1390	0		610	-1390	0
611	-1389	2.35405		611	-1389	3.38594			611	-1389	0		611	-1389	0
612	-1388	2.35405		612	-1388	3.38594			612	-1388	0		612	-1388	0
613	-1387	2.35405		613	-1387	3.38594			613	-1387	0		613	-1387	0
614	-1386	2.35405		614	-1386	3.38594			614	-1386	0		614	-1386	0
615	-1385	2.35405		615	-1385	3.38594			615	-1385	0		615	-1385	0
616	-1384	2.35405		616	-1384	3.38594			616	-1384	0		616	-1384	0
617	-1383	2.35405		617	-1383	3.38594			617	-1383	0		617	-1383	0
618	-1382	2.35405		618	-1382	3.38594			618	-1382	0		618	-1382	0
619	-1381	2.35405		619	-1381	3.38594			619	-1381	0		619	-1381	0
620	-1380	2.35405		620	-1380	3.38594			620	-1380	0		620	-1380	0
621	-1379	2.35405		621	-1379	3.38594			621	-1379	0		621	-1379	0
622	-1378	2.35405		622	-1378	3.38594			622	-1378	0		622	-1378	0
623	-1377	2.35405		623	-1377	3.38594			623	-1377	0		623	-1377	0
624	-1376	2.35405		624	-1376	3.38594			624	-1376	0		624	-1376	0
625	-1375	2.35405		625	-1375	3.38594			625	-1375	0		625	-1375	0
626	-1374	2.35405		626	-1374	3.38594			626	-1374	0		626	-1374	0
627	-1373	2.35405		627	-1373	3.38594			627	-1373	0		627	-1373	0
628	-1372	2.35405		628	-1372	3.38594			628	-1372	0		628	-1372	0
629	-1371	2.35405		629	-1371	3.38594			629	-1371	0		629	-1371	0
630	-1370	2.35405		630	-1370	3.38594			630	-1370	0		630	-1370	0
631	-1369	2.35405		631	-1369	3.38594			631	-1369	0		631	-1369	0
632	-1368	2.35405		632	-1368	3.38594			632	-1368	0		632	-1368	0
633	-1367	2.35405		633	-1367	3.38594			633	-1367	0		633	-1367	0
634	-1366	2.35405		634	-1366	3.38594			634	-1366	0		634	-1366	0
635	-1365	2.35405		635	-1365	3.38594			635	-1365	0		635	-1365	0
636	-1364	2.35405		636	-1364	3.38594			636	-1364	0		636	-1364	0
637	-1363	2.35405		637	-1363	3.38594			637	-1363	0		637	-1363	0
638	-1362	2.35405		638	-1362	3.38594			638	-1362	0		638	-1362	0
639	-1361	2.35405		639	-1361	3.38594			639	-1361	0		639	-1361	0
640	-1360	2.35405		640	-1360	3.38594			640	-1360	0		640	-1360	0
641	-1359	2.35405		641	-1359	3.38594			641	-1359	0		641	-1359	0
642	-1358	2.35405		642	-1358	3.38594			642	-1358	0		642	-1358	0
643	-1357	2.35405		643	-1357	3.38594			643	-1357	0		643	-1357	0
644	-1356	2.35405		644	-1356	3.38594			644	-1356	0		644	-1356	0
645	-1355	2.35405		645	-1355	3.38594			645	-1355	0		645	-1355	0
646	-1354	2.35405		646	-1354	3.38594			646	-1354	0		646	-1354	0
647	-1353	2.35405		647	-1353	3.38594			647	-1353	0		647	-1353	0
648	-1352	2.35405		648	-1352	3.38594			648	-1352	0		648	-1352	0
649	-1351	2.35405		649	-1351	3.38594			649	-1351	0		649	-1351	0
650	-1350	2.35405		650	-1350	3.38594			650	-1350	0		650	-1350	0
651	-1349	2.35405		651	-1349	3.38594			651	-1349	0		651	-1349	0
652	-1348	2.35405		652	-1348	3.38594			652	-1348	0		652	-1348	0
653	-1347	2.35405		653	-1347	3.38594			653	-1347	0		653	-1347	0
654	-1346	2.35405		654	-1346	3.38594			654	-1346	0		654	-1346	0
655	-1345	2.35405		655	-1345	3.38594			655	-1345	0		655	-1345	0
656	-1344	2.35405		656	-1344	3.38594			656	-1344	0		656	-1344	0
657	-1343	2.35405		657	-1343	3.38594			657	-1343	0		657	-1343	0
658	-1342	2.35405		658	-1342	3.38594			658	-1342	0		658	-1342	0
659	-1341	2.35405		659	-1341	3.38594			659	-1341	0		659	-1341	0
660	-1340	2.35405		660	-1340	3.38594			660	-1340	0		660	-1340	0
661	-1339	2.35405		661	-1339	3.38594			661	-1339	0		661	-1339	0
662	-1338	2.35405		662	-1338	3.38594			662	-1338	0		662	-1338	0
663	-1337	2.35405		663	-1337	3.38594			663	-1337	0		663	-1337	0
664	-1336	2.35405		664	-1336	3.38594			664	-1336	0		664	-1336	0
665	-1335	2.35405		665	-1335	3.38594			665	-1335	0		665	-1335	0
666	-1334	2.35405		666	-1334	3.38594			666	-1334	0		666	-1334	0
667	-1333	2.35405		667	-1333	3.38594			667	-1333	0		667	-1333	0
668	-1332	2.35405		668	-1332	3.38594			668	-1332	0		668	-1332	0
669	-1331	2.35405		669	-1331	3.38594			669	-1331	0		669	-1331	0
670	-1330	2.35405		670	-1330	3.38594			670	-1330	0		670	-1330	0
671	-1329	2.35405		671	-1329	3.38594			671	-1329	0		671	-1329	0
672	-1328	2.35405		672	-1328	3.38594			672	-1328	0		672	-1328	0
673	-1327	2.35405		673	-1327	3.38594			673	-1327	0		673	-1327	0
674	-1326	2.35405		674	-1326	3.38594			674	-1326	0		674	-1326	0
675	-1325	2.35405		675	-1325	3.38594			675	-1325	0		675	-1325	0
676	-1324	2.35405		676	-1324	3.38594			676	-1324	0		676	-1324	0
677	-1323	2.35405		677	-1323	3.38594			677	-1323	0		677	-1323	0
678	-1322	2.35405		678	-1322	3.38594			678	-1322	0		678	-1322	0
679	-1321	2.35405		679	-1321	3.38594			679	-1321	0		679	-1321	0
680	-1320	2.35405		680	-1320	3.38594			680	-1320	0		680	-1320	0
681	-1319	2.35405		681	-1319	3.38594			681	-1319	0		681	-1319	0
682	-1318	2.35405		682	-1318	3.38594			682	-1318	0		682	-1318	0
683	-1317	2.35405		683	-1317	3.38594			683	-1317	0		683	-1317	0
684	-1316	2.35405		684	-1316	3.38594			684	-1316	0		684	-1316	0
685	-1315	2.35405		685	-1315	3.38594			685	-1315	0		685	-1315	0
686	-1314	2.35405		686	-1314	3.38594			686	-1314	0		686	-1314	0
687	-1313	2.35405		687	-1313	3.38594			687	-1313	0		687	-1313	0
688	-1312	2.35405		688	-1312	3.38594			688	-1312	0		688	-1312	0
689	-1311	2.35405		689	-1311	3.38594			689	-1311	0		689	-1311	0
690	-1310	2.35405		690	-1310	3.38594			690	-1310	0		690	-1310	0
691	-1309	2.35405		691	-1309	3.38594			691	-1309	0		691	-1309	0
692	-1308	2.35405		692	-1308	3.38594			692	-1308	0		692	-1308	0
693	-1307	2.35405		693	-1307	3.38594			693	-1307	0		693	-1307	0
694	-1306	2.35405		694	-1306	3.38594			694	-1306	0		694	-1306	0
695	-1305	2.35405		695	-1305	3.38594			695	-1305	0		695	-1305	0
696	-1304	2.35405		696	-1304	3.38594			696	-1304	0		696	-1304	0
697	-1303	2.35405		697	-1303	3.38594			697	-1303	0		697	-1303	0
698	-1302	2.35405		698	-1302	3.38594			698	-1302	0		698	-1302	0
699	-1301	2.35405		699	-1301	3.38594			699	-1301	0		699	-1301	0
700	-1300	2.35405		700	-1300	3.38594			700	-1300	0		700	-1300	0
701	-1299	2.35405		701	-1299	3.38594			701	-1299	0		701	-1299	0
702	-1298	2.35405		702	-1298	3.38594			702	-1298	0		702	-1298	0
703	-1297	2.35405		703	-1297	3.38594			703	-1297	0		703	-1297	0
704	-1296	2.35405		704	-1296	3.38594			704	-1296	0		704	-1296	0
705	-1295	2.35405		705	-1295	3.38594			705	-1295	0		705	-1295	0
706	-1294	2.35405		706	-1294	3.38594			706	-1294	0		706	-1294	0
707	-1293	2.35405		707	-1293	3.38594			707	-1293	0		707	-1293	0
708	-1292	2.35405		708	-1292	3.38594			708	-1292	0		708	-1292	0
709	-1291	2.35405		709	-1291	3.38594			709	-1291	0		709	-1291	0
710	-1290	2.35405		710	-1290	3.38594			710	-1290	0		710	-1290	0
711	-1289	2.35405		711	-1289	3.38594			711	-1289	0		711	-1289	0
712	-1288	2.35405		712	-1288	3.38594			712	-1288	0		712	-1288	0
713	-1287	2.35405		713	-1287	3.38594			713	-1287	0		713	-1287	0
714	-1286	2.35405		714	-1286	3.38594			714	-1286	0		714	-1286	0
715	-1285	2.35405		715	-1285	3.38594			715	-1285	0		715	-1285	0
716	-1284	2.35405		716	-1284	3.38594			716	-1284	0		716	-1284	0
717	-1283	2.35405		717	-1283	3.38594			717	-1283	0		717	-1283	0
718	-1282	2.35405		718	-1282	3.38594			718	-1282	0		718	-1282	0
719	-1281	2.35405		719	-1281	3.38594			719	-1281	0		719	-1281	0
720	-1280	2.35405		720	-1280	3.38594			720	-1280	0		720	-1280	0
721	-1279	2.35405		721	-1279	3.38594			721	-1279	0		721	-1279	0
722	-1278	2.35405		722	-1278	3.38594			722	-1278	0		722	-1278	0
723	-1277	2.35405		723	-1277	3.38594			723	-1277	0		723	-1277	0
724	-1276	2.35405		724	-1276	3.38594			724	-1276	0		724	-1276	0
725	-1275	2.35405		725	-1275	3.38594			725	-1275	0		725	-1275	0
726	-1274	2.35405		726	-1274	3.38594			726	-1274	0		726	-1274	0
727	-1273	2.35405		727	-1273	3.38594			727	-1273	0		727	-1273	0
728	-1272	2.35405		728	-1272	3.38594			728	-1272	0		728	-1272	0
729	-1271	2.35405		729	-1271	3.38594			729	-1271	0		729	-1271	0
730	-1270	2.35405		730	-1270	3.38594			730	-1270	0		730	-1270	0
731	-1269	2.35405		731	-1269	3.38594			731	-1269	0		731	-1269	0
732	-1268	2.35405		732	-1268	3.38594			732	-1268	0		732	-1268	0
733	-1267	2.35405		733	-1267	3.38594			733	-1267	0		733	-1267	0
734	-1266	2.35405		734	-1266	3.38594			734	-1266	0		734	-1266	0
735	-1265	2.35405		735	-1265	3.38594			735	-1265	0		735	-1265	0
736	-1264	2.35405		736	-1264	3.38594			736	-1264	0		736	-1264	0
737	-1263	2.35405		737	-1263	3.38594			737	-1263	0		737	-1263	0
738	-1262	2.35405		738	-1262	3.38594			738	-1262	0		738	-1262	0
739	-1261	2.35405		739	-1261	3.38594			739	-1261	0		739	-1261	0
740	-1260	2.35405		740	-1260	3.38594			740	-1260	0		740	-1260	0
741	-1259	2.35405		741	-1259	3.38594			741	-1259	0		741	-1259	0
742	-1258	2.35405		742	-1258	3.38594			742	-1258	0		742	-1258	0
743	-1257	2.35405		743	-1257	3.38594			743	-1257	0		743	-1257	0
744	-1256	2.35405		744	-1256	3.38594			744	-1256	0		744	-1256	0
745	-1255	2.35405		745	-1255	3.38594			745	-1255	0		745	-1255	0
746	-1254	2.35405		746	-1254	3.38594			746	-1254	0		746	-1254	0
747	-1253	2.35405		747	-1253	3.38594			747	-1253	0		747	-1253	0
748	-1252	2.35405		748	-1252	3.38594			748	-1252	0		748	-1252	0
749	-1251	2.35405		749	-1251	3.38594			749	-1251	0		749	-1251	0
750	-1250	2.35405		750	-1250	3.38594			750	-1250	0		750	-1250	0
751	-1249	2.35405		751	-1249	3.38594			751	-1249	0		751	-1249	0
752	-1248	2.35405		752	-1248	3.38594			752	-1248	0		752	-1248	0
753	-1247	2.35405		753	-1247	3.38594			753	-1247	0		753	-1247	0
754	-1246	2.35405		754	-1246	3.38594			754	-1246	0		754	-1246	0
755	-1245	2.35405		755	-1245	3.38594			755	-1245	0		755	-1245	0
756	-1244	2.35405		756	-1244	3.38594			756	-1244	0		756	-1244	0
757	-1243	2.35405		757	-1243	3.38594			757	-1243	0		757	-1243	0
758	-1242	2.35405		758	-1242	3.38594			758	-1242	0		758	-1242	0
759	-1241	2.35405		759	-1241	3.38594			759	-1241	0		759	-1241	0
760	-1240	2.35405		760	-1240	3.38594			760	-1240	0		760	-1240	0
761	-1239	2.35405		761	-1239	3.38594			761	-1239	0		761	-1239	0
762	-1238	2.35405		762	-1238	3.38594			762	-1238	0		762	-1238	0
763	-1237	2.35405		763	-1237	3.38594			763	-1237	0		763	-1237	0
764	-1236	2.35405		764	-1236	3.38594			764	-1236	0		764	-1236	0
765	-1235	2.35405		765	-1235	3.38594			765	-1235	0		765	-1235	0
766	-1234	2.35405		766	-1234	3.38594			766	-1234	0		766	-1234	0
767	-1233	2.35405		767	-1233	3.38594			767	-1233	0		767	-1233	0
768	-1232	2.35405		768	-1232	3.38594			768	-1232	0		768	-1232	0
769	-1231	2.35405		769	-1231	3.38594			769	-1231	0		769	-1231	0
770	-1230	2.35405		770	-1230	3.38594			770	-1230	0		770	-1230	0
771	-1229	2.35405		771	-1229	3.38594			771	-1229	0		771	-1229	0
772	-1228	2.35405		772	-1228	3.38594			772	-1228	0		772	-1228	0
773	-1227	2.35405		773	-1227	3.38594			773	-1227	0		773	-1227	0
774	-1226	2.35405		774	-1226	3.38594			774	-1226	0		774	-1226	0
775	-1225	2.35405		775	-1225	3.38594			775	-1225	0		775	-1225	0
776	-1224	2.35405		776	-1224	3.38594			776	-1224	0		776	-1224	0
777	-1223	2.35405		777	-1223	3.38594			777	-1223	0		777	-1223	0
778	-1222	2.35405		778	-1222	3.38594			778	-1222	0		778	-1222	0
779	-1221	2.35405		779	-1221	3.38594			779	-1221	0		779	-1221	0
780	-1220	2.35405		780	-1220	3.38594			780	-1220	0		780	-1220	0
781	-1219	2.35405		781	-1219	3.38594			781	-1219	0		781	-1219	0
782	-1218	2.35405		782	-1218	3.38594			782	-1218	0		782	-1218	0
783	-1217	2.35405		783	-1217	3.38594			783	-1217	0		783	-1217	0
784	-1216	2.35405		784	-1216	3.38594			784	-1216	0		784	-1216	0
785	-1215	2.35405		785	-1215	3.38594			785	-1215	0		785	-1215	0
786	-1214	2.35405		786	-1214	3.38594			786	-1214	0		786	-1214	0
787	-1213	2.35405		787	-1213	3.38594			787	-1213	0		787	-1213	0
788	-1212	2.35405		788	-1212	3.38594			788	-1212	0		788	-1212	0
789	-1211	2.35405		789	-1211	3.38594			789	-1211	0		789	-1211	0
790	-1210	2.35405		790	-1210	3.38594			790	-1210	0		790	-1210	0
791	-1209	2.35405		791	-1209	3.38594			791	-1209	0		791	-1209	0
792	-1208	2.35405		792	-1208	3.38594			792	-1208	0		792	-1208	0
793	-1207	2.35405		793	-1207	3.38594			793	-1207	0		793	-1207	0
794	-1206	2.35405		794	-1206	3.38594			794	-1206	0		794	-1206	0
795	-1205	2.35405		795	-1205	3.38594			795	-1205	0		795	-1205	0
796	-1204	2.35405		796	-1204	3.38594			796	-1204	0		796	-1204	0
797	-1203	2.35405		797	-1203	3.38594			797	-1203	0		797	-1203	0
798	-1202	2.35405		798	-1202	3.38594			798	-1202	0		798	-1202	0
799	-1201	2.35405		799	-1201	3.38594			799	-1201	0		799	-1201	0
800	-1200	2.35405		800	-1200	3.38594			800	-1200	0		800	-1200	0
801	-1199	2.35405		801	-1199	3.38594			801	-1199	0		801	-1199	0
802	-1198	2.35405		802	-1198	3.38594			802	-1198	0		802	-1198	0
803	-1197	2.35405		803	-1197	3.38594			803	-1197	0		803	-1197	0
804	-1196	2.35405		804	-1196	3.38594			804	-1196	0		804	-1196	0
805	-1195	2.35405		805	-1195	3.38594			805	-1195	0		805	-1195	0
806	-1194	2.35405		806	-1194	3.38594			806	-1194	0		806	-1194	0
807	-1193	2.35405		807	-1193	3.38594			807	-1193	0		807	-1193	0
808	-1192	2.35405		808	-1192	3.38594			808	-1192	0		808	-1192	0
809	-1191	2.35405		809	-1191	3.38594			809	-1191	0		809	-1191	0
810	-1190	2.35405		810	-1190	3.38594			810	-1190	0		810	-1190	0
811	-1189	2.35405		811	-1189	3.38594			811	-1189	0		811	-1189	0
812	-1188	2.35405		812	-1188	3.38594			812	-1188	0		812	-1188	0
813	-1187	2.35405		813	-1187	3.38594			813	-1187	0		813	-1187	0
814	-1186	2.35405		814	-1186	3.38594			814	-1186	0		814	-1186	0
815	-1185	2.35405		815	-1185	3.38594			815	-1185	0		815	-1185	0
816	-1184	2.35405		816	-1184	3.38594			816	-1184	0		816	-1184	0
817	-1183	2.35405		817	-1183	3.38594			817	-1183	0		817	-1183	0
818	-1182	2.35405		818	-1182	3.38594			818	-1182	0		818	-1182	0
819	-1181	2.35405		819	-1181	3.38594			819	-1181	0		819	-1181	0
820	-1180	2.35405		820	-1180	3.38594			820	-1180	0		820	-1180	0
821	-1179	2.35405		821	-1179	3.38594			821	-1179	0		821	-1179	0
822	-1178	2.35405		822	-1178	3.38594			822	-1178	0		822	-1178	0
823	-1177	2.35405		823	-1177	3.38594			823	-1177	0		823	-1177	0
824	-1176	2.35405		824	-1176	3.38594			824	-1176	0		824	-1176	0
825	-1175	2.35405		825	-1175	3.38594			825	-1175	0		825	-1175	0
826	-1174	2.35405		826	-1174	3.38594			826	-1174	0		826	-1174	0
827	-1173	2.35405		827	-1173	3.38594			827	-1173	0		827	-1173	0
828	-1172	2.35405		828	-1172	3.38594			828	-1172	0		828	-1172	0
829	-1171	2.35405		829	-1171	3.38594			829	-1171	0		829	-1171	0
830	-1170	2.35405		830	-1170	3.38594			830	-1170	0		830	-1170	0
831	-1169	2.35405		831	-1169	3.38594			831	-1169	0		831	-1169	0
832	-1168	2.35405		832	-1168	3.38594			832	-1168	0		832	-1168	0
833	-1167	2.35405		833	-1167	3.38594			833	-1167	0		833	-1167	0
834	-1166	2.35405		834	-1166	3.38594			834	-1166	0		834	-1166	0
835	-1165	2.35405		835	-1165	3.38594			835	-1165	0		835	-1165	0
836	-1164	2.35405		836	-1164	3.38594			836	-1164	0		836	-1164	0
837	-1163	2.35405		837	-1163	3.38594			837	-1163	0		837	-1163	0
838	-1162	2.35405		838	-1162	3.38594			838	-1162	0		838	-1162	0
839	-1161	2.35405		839	-1161	3.38594			839	-1161	0		839	-1161	0
840	-1160	2.35405		840	-1160	3.38594			840	-1160	0		840	-1160	0
841	-1159	2.35405		841	-1159	3.38594			841	-1159	0		841	-1159	0
842	-1158	2.35405		842	-1158	3.38594			842	-1158	0		842	-1158	0
843	-1157	2.35405		843	-1157	3.38594			843	-1157	0		843	-1157	0
844	-1156	2.35405		844	-1156	3.38594			844	-1156	0		844	-1156	0
845	-1155	2.35405		845	-1155	3.38594			845	-1155	0		845	-1155	0
846	-1154	2.35405		846	-1154	3.38594			846	-1154	0		846	-1154	0
847	-1153	2.35405		847	-1153	3.38594			847	-1153	0		847	-1153	0
848	-1152	2.35405		848	-1152	3.38594			848	-1152	0		848	-1152	0
849	-1151	2.35405		849	-1151	3.38594			849	-1151	0		849	-1151	0
850	-1150	2.35405		850	-1150	3.38594			850	-1150	0		850	-1150	0
851	-1149	2.35405		851	-1149	3.38594			851	-1149	0		851	-1149	0
852	-1148	2.35405		852	-1148	3.38594			852	-1148	0		852	-1148	0
853	-1147	2.35405		853	-1147	3.38594			853	-1147	0		853	-1147	0
854	-1146	2.35405		854	-1146	3.38594			854	-1146	0		854	-1146	0
855	-1145	2.35405		855	-1145	3.38594			855	-1145	0		855	-1145	0
856	-1144	2.35405		856	-1144	3.38594			856	-1144	0		856	-1144	0
857	-1143	2.35405		857	-1143	3.38594			857	-1143	0		857	-1143	0
858	-1142	2.35405		858	-1142	3.38594			858	-1142	0		858	-1142	0
859	-1141	2.35405		859	-1141	3.38594			859	-1141	0		859	-1141	0
860	-1140	2.35405		860	-1140	3.38594			860	-1140	0		860	-1140	0
861	-1139	2.35405		861	-1139	3.38594			861	-1139	0		861	-1139	0
862	-1138	2.35405		862	-1138	3.38594			862	-1138	0		862	-1138	0
863	-1137	2.35405		863	-1137	3.38594			863	-1137	0		863	-1137	0
864	-1136	2.35405		864	-1136	3.38594			864	-1136	0		864	-1136	0
865	-1135	2.35405		865	-1135	3.38594			865	-1135	0		865	-1135	0
866	-1134	2.35405		866	-1134	3.38594			866	-1134	0		866	-1134	0
867	-1133	2.35405		867	-1133	3.38594			867	-1133	0		867	-1133	0
868	-1132	2.35405		868	-1132	3.38594			868	-1132	0		868	-1132	0
869	-1131	2.35405		869	-1131	3.38594			869	-1131	0		869	-1131	0
870	-1130	2.35405		870	-1130	3.38594			870	-1130	0		870	-1130	0
871	-1129	2.35405		871	-1129	3.38594			871	-1129	0		871	-1129	0
872	-1128	2.35405		872	-1128	3.38594			872	-1128	0		872	-1128	0
873	-1127	2.35405		873	-1127	3.38594			873	-1127	0		873	-1127	0
874	-1126	2.35405		874	-1126	3.38594			874	-1126	0		874	-1126	0
875	-1125	2.35405		875	-1125	3.38594			875	-1125	0		875	-1125	0
876	-1124	2.35405		876	-1124	3.38594			876	-1124	0		876	-1124	0
877	-1123	2.35405		877	-1123	3.38594			877	-1123	0		877	-1123	0
878	-1122	2.35405		878	-1122	3.38594			878	-1122	0		878	-1122	0
879	-1121	2.35405		879	-1121	3.38594			879	-1121	0		879	-1121	0
880	-1120	2.35405		880	-1120	3.38594			880	-1120	0		880	-1120	0
881	-1119	2.35405		881	-1119	3.38594			881	-1119	0		881	-1119	0
882	-1118	2.35405		882	-1118	3.38594			882	-1118	0		882	-1118	0
883	-1117	2.35405		883	-1117	3.38594			883	-1117	0		883	-1117	0
884	-1116	2.35405		884	-1116	3.38594			884	-1116	0		884	-1116	0
885	-1115	2.35405		885	-1115	3.38594			885	-1115	0		885	-1115	0
886	-1114	2.35405		886	-1114	3.38594			886	-1114	0		886	-1114	0
887	-1113	2.35405		887	-1113	3.38594			887	-1113	0		887	-1113	0
888	-1112	2.35405		888	-1112	3.38594			888	-1112	0		888	-1112	0
889	-1111	2.35405		889	-1111	3.38594			889	-1111	0		889	-1111	0
890	-1110	2.35405		890	-1110	3.38594			890	-1110	0		890	-1110	0
891	-1109	2.35405		891	-1109	3.38594			891	-1109	0		891	-1109	0
892	-1108	2.35405		892	-1108	3.38594			892	-1108	0		892	-1108	0
893	-1107	2.35405		893	-1107	3.38594			893	-1107	0		893	-1107	0
894	-1106	2.35405		894	-1106	3.38594			894	-1106	0		894	-1106	0
895	-1105	2.35405		895	-1105	3.38594			895	-1105	0		895	-1105	0
896	-1104	2.35405		896	-1104	3.38594			896	-1104	0		896	-1104	0
897	-1103	2.35405		897	-1103	3.38594			897	-1103	0		897	-1103	0
898	-1102	2.35405		898	-1102	3.38594			898	-1102	0		898	-1102	0
899	-1101	2.35405		899	-1101	3.38594			899	-1101	0		899	-1101	0
900	-1100	2.35405		900	-1100	3.38594			900	-1100	0		900	-1100	0
901	-1099	2.35405		901	-1099	3.38594			901	-1099	0		901	-1099	0
902	-1098	2.35405		902	-1098	3.38594			902	-1098	0		902	-1098	0
903	-1097	2.35405		903	-1097	3.38594			903	-1097	0		903	-1097	0
904	-1096	2.35405		904	-1096	3.38594			904	-1096	0		904	-1096	0
905	-1095	2.35405		905	-1095	3.38594			905	-1095	0		905	-1095	0
906	-1094	2.35405		906	-1094	3.38594			906	-1094	0		906	-1094	0
907	-1093	2.35405		907	-1093	3.38594			907	-1093	0		907	-1093	0
908	-1092	2.35405		908	-1092	3.38594			908	-1092	0		908	-1092	0
909	-1091	2.35405		909	-1091	3.38594			909	-1091	0		909	-1091	0
910	-1090	2.35405		910	-1090	3.38594			910	-1090	0		910	-1090	0
911	-1089	2.35405		911	-1089	3.38594			911	-1089	0		911	-1089	0
912	-1088	2.35405		912	-1088	3.38594			912	-1088	0		912	-1088	0
913	-1087	2.35405		913	-1087	3.38594			913	-1087	0		913	-1087	0
914	-1086	2.35405		914	-1086	3.38594			914	-1086	0		914	-1086	0
915	-1085	2.35405		915	-1085	3.38594			915	-1085	0		915	-1085	0
916	-1084	2.35405		916	-1084	3.38594			916	-1084	0		916	-1084	0
917	-1083	2.35405		917	-1083	3.38594			917	-1083	0		917	-1083	0
918	-1082	2.35405		918	-1082	3.38594			918	-1082	0		918	-1082	0
919	-1081	2.35405		919	-1081	3.38594			919	-1081	0		919	-1081	0
920	-1080	2.35405		920	-1080	3.38594			920	-1080	0		920	-1080	0
921	-1079	2.35405		921	-1079	3.38594			921	-1079	0		921	-1079	0
922	-1078	2.35405		922	-1078	3.38594			922	-1078	0		922	-1078	0
923	-1077	2.35405		923	-1077	3.38594			923	-1077	0		923	-1077	0
924	-1076	2.35405		924	-1076	3.38594			924	-1076	0		924	-1076	0
925	-1075	2.35405		925	-1075	3.38594			925	-1075	0		925	-1075	0
926	-1074	2.35405		926	-1074	3.38594			926	-1074	0		926	-1074	0
927	-1073	2.35405		927	-1073	3.38594			927	-1073	0		927	-1073	0
928	-1072	2.35405		928	-1072	3.38594			928	-1072	0		928	-1072	0
929	-1071	2.35405		929	-1071	3.38594			929	-1071	0		929	-1071	0
930	-1070	2.35405		930	-1070	3.38594			930	-1070	0		930	-1070	0
931	-1069	2.35405		931	-1069	3.38594			931	-1069	0		931	-1069	0
932	-1068	2.35405		932	-1068	3.38594			932	-1068	0		932	-1068	0
933	-1067	2.35405		933	-1067	3.38594			933	-1067	0		933	-1067	0
934	-1066	2.35405		934	-1066	3.38594			934	-1066	0		934	-1066	0
935	-1065	2.35405		935	-1065	3.38594			935	-1065	0		935	-1065	0
936	-1064	2.35405		936	-1064	3.38594			936	-1064	0		936	-1064	0
937	-1063	2.35405		937	-1063	3.38594			937	-1063	0		937	-1063	0
938	-1062	2.35405		938	-1062	3.38594			938	-1062	0		938	-1062	0
939	-1061	2.35405		939	-1061	3.38594			939	-1061	0		939	-1061	0
940	-1060	2.35405		940	-1060	3.38594			940	-1060	0		940	-1060	0
941	-1059	2.35405		941	-1059	3.38594			941	-1059	0		941	-1059	0
942	-1058	2.35405		942	-1058	3.38594			942	-1058	0		942	-1058	0
943	-1057	2.35405		943	-1057	3.38594			943	-1057	0		943	-1057	0
944	-1056	2.35405		944	-1056	3.38594			944	-1056	0		944	-1056	0
945	-1055	2.35405		945	-1055	3.38594			945	-1055	0		945	-1055	0
946	-1054	2.35405		946	-1054	3.38594			946	-1054	0		946	-1054	0
947	-1053	2.35405		947	-1053	3.38594			947	-1053	0		947	-1053	0
948	-1052	2.35405		948	-1052	3.38594			948	-1052	0		948	-1052	0
949	-1051	2.35405		949	-1051	3.38594			949	-1051	0		949	-1051	0
950	-1050	2.35405		950	-1050	3.38594			950	-1050	0		950	-1050	0
951	-1049	2.35405		951	-1049	3.38594			951	-1049	0		951	-1049	0
952	-1048	2.35405		952	-1048	3.38594			952	-1048	0		952	-1048	0
953	-1047	2.35405		953	-1047	3.38594			953	-1047	0		953	-1047	0
954	-1046	2.35405		954	-1046	3.38594			954	-1046	0		954	-1046	0
955	-1045	2.35405		955	-1045	3.38594			955	-1045	0		955	-1045	0
956	-1044	2.35405		956	-1044	3.38594			956	-1044	0		956	-1044	0
957	-1043	2.35405		957	-1043	3.38594			957	-1043	0		957	-1043	0
958	-1042	2.35405		958	-1042	3.38594			958	-1042	0		958	-1042	0
959	-1041	2.35405		959	-1041	3.38594			959	-1041	0		959	-1041	0
960	-1040	2.35405		960	-1040	3.38594			960	-1040	0		960	-1040	0
961	-1039	2.35405		961	-1039	3.38594			961	-1039	0		961	-1039	0
962	-1038	2.35405		962	-1038	3.38594			962	-1038	0		962	-1038	0
963	-1037	2.35405		963	-1037	3.38594			963	-1037	0		963	-1037	0
964	-1036	2.35405		964	-1036	3.38594			964	-1036	0		964	-1036	0
965	-1035	2.35405		965	-1035	3.38594			965	-1035	0		965	-1035	0
966	-1034	2.35405		966	-1034	3.38594			966	-1034	0		966	-1034	0
967	-1033	2.35405		967	-1033	3.38594			967	-1033	0		967	-1033	0
968	-1032	2.35405		968	-1032	3.38594			968	-1032	0		968	-1032	0
969	-1031	2.35405		969	-1031	3.38594			969	-1031	0		969	-1031	0
970	-1030	2.35405		970	-1030	3.38594			970	-1030	0		970	-1030	0
971	-1029	2.35405		971	-1029	3.38594			971	-1029	0		971	-1029	0
972	-1028	2.35405		972	-1028	3.38594			972	-1028	0		972	-1028	0
973	-1027	2.35405		973	-1027	3.38594			973	-1027	0		973	-1027	0
974	-1026	2.35405		974	-1026	3.38594			974	-1026	0		974	-1026	0
975	-1025	2.35405		975	-1025	3.38594			975	-1025	0		975	-1025	0
976	-1024	2.35405		976	-1024	3.38594			976	-1024	0		976	-1024	0
977	-1023	2.35405		977	-1023	3.38594			977	-1023	0		977	-1023	0
978	-1022	2.35405		978	-1022	3.38594			978	-1022	0		978	-1022	0
979	-1021	2.35405		979	-1021	3.38594			979	-1021	0		979	-1021	0
980	-1020	2.35405		980	-1020	3.38594			980	-1020	0		980	-1020	0
981	-1019	2.35405		981	-1019	3.38594			981	-1019	0		981	-1019	0
982	-1018	2.35405		982	-1018	3.38594			982	-1018	0		982	-1018	0
983	-1017	2.35405		983	-1017	3.38594			983	-1017	0		983	-1017	0
984	-1016	2.35405		984	-1016	3.38594			984	-1016	0		984	-1016	0
985	-1015	2.35405		985	-1015	3.38594			985	-1015	0		985	-1015	0
986	-1014	2.35405		986	-1014	3.38594			986	-1014	0		986	-1014	0
987	-1013	2.35405		987	-1013	3.38594			987	-1013	0		987	-1013	0
988	-1012	2.35405		988	-1012	3.38594			988	-1012	0		988	-1012	0
989	-1011	2.35405		989	-1011	3.38594			989	-1011	0		989	-1011	0
990	-1010	2.35405		990	-1010	3.38594			990	-1010	0		990	-1010	0
991	-1009	2.35405		991	-1009	3.38594			991	-1009	0		991	-1009	0
992	-1008	2.35405		992	-1008	3.38594			992	-1008	0		992	-1008	0
993	-1007	2.35405		993	-1007	3.38594			993	-1007	0		993	-1007	0
994	-1006	2.35405		994	-1006	3.38594			994	-1006	0		994	-1006	0
995	-1005	2.35405		995	-1005	3.38594			995	-1005	0		995	-1005	0
996	-1004	2.35405		996	-1004	3.38594			996	-1004	0		996	-1004	0
997	-1003	2.35405		997	-1003	3.38594			997	-1003	0		997	-1003	0
998	-1002	2.35405		998	-1002	3.38594			998	-1002	0		998	-1002	0
999	-1001	2.35405		999	-1001	3.38594			999	-1001	0		999	-1001	0
1000	-1000	2.35405		1000	-1000	3.38594			1000	-1000	0		1000	-1000	0
1001	-999	2.35405		1001	-999	3.38594			1001	-999	0		1001	-999	0
1002	-998	2.35405		1002	-998	3.38594			1002	-998	0		1002	-998	0
1003	-997	2.35405		1003	-997	3.38594			1003	-997	0		1003	-997	0
1004	-996	2.35405		1004	-996	3.38594			1004	-996	0		1004	-996	0
1005	-995	2.35405		1005	-995	3.38594			1005	-995	0		1005	-995	0
1006	-994	2.35405		1006	-994	3.38594			1006	-994	0		1006	-994	0
1007	-993	2.35405		1007	-993	3.38594			1007	-993	0		1007	-993	0
1008	-992	2.35405		1008	-992	3.38594			1008	-992	0		1008	-992	0
1009	-991	2.35405		1009	-991	3.38594			1009	-991	0		1009	-991	0
1010	-990	2.35405		1010	-990	3.38594			1010	-990	0		1010	-990	0
1011	-989	2.35405		1011	-989	3.38594			1011	-989	0		1011	-989	0
1012	-988	2.35405		1012	-988	3.38594			1012	-988	0		1012	-988	0
1013	-987	2.35405		1013	-987	3.38594			1013	-987	0		1013	-987	0
1014	-986	2.35405		1014	-986	3.38594			1014	-986	0		1014	-986	0
1015	-985	2.35405		1015	-985	3.38594			1015	-985	0		1015	-985	0
1016	-984	2.35405		1016	-984	3.38594			1016	-984	0		1016	-984	0
1017	-983	2.35405		1017	-983	3.38594			1017	-983	0		1017	-983	0
1018	-982	2.35405		1018	-982	3.38594			1018	-982	0		1018	-982	0
1019	-981	2.35405		1019	-981	3.38594			1019	-981	0		1019	-981	0
1020	-980	2.35405		1020	-980	3.38594			1020	-980	0		1020	-980	0
1021	-979	2.35405		1021	-979	3.38594			1021	-979	0		1021	-979	0
1022	-978	7.84011		1022	-978	3.38594			1022	-978	0		1022	-978	0
1023	-977	7.84011		1023	-977	3.38594			1023	-977	0		1023	-977	0
1024	-976	8.47598		1024	-976	3.38594			1024	-976	0		1024	-976	0
1025	-975	8.47598		1025	-975	3.38594			1025	-975	0		1025	-975	0
1026	-974	9.653		1026	-974	3.38594			1026	-974	0		1026	-974	0
1027	-973	9.653		1027	-973	3.38594			1027	-973	0		1027	-973	0
1028	-972	9.06449		1028	-972	3.38594			1028	-972	0		1028	-972	0
1029	-971	9.06449		1029	-971	3.38594			1029	-971	0		1029	-971	0
1030	-970	10.2415		1030	-970	3.38594			1030	-970	0		1030	-970	0
1031	-969	10.2415		1031	-969	3.38594			1031	-969	0		1031	-969	0
1032	-968	10.8774		1032	-968	3.38594			1032	-968	0		1032	-968	0
1033	-967	10.8774		1033	-967	3.38594			1033	-967	0		1033	-967	0
1034	-966	11.5133		1034	-966	3.38594			1034	-966	0		1034	-966	0
1035	-965	12.1018		1035	-965	3.38594			1035	-965	0		1035	-965	0
1036	-964	12.1018		1036	-964	3.38594			1036	-964	0		1036	-964	0
1037	-963	12.7377		1037	-963	3.38594			1037	-963	0		1037	-963	0
1038	-962	12.1491		1038	-962	3.38594			1038	-962	0		1038	-962	0
1039	-961	12.7377		1039	-961	3.38594			1039	-961	0		1039	-961	0
1040	-960	12.7377		1040	-960	3.38594			1040	-960	0		1040	-960	0
1041	-959	12.7377		1041	-959	3.38594			1041	-959	0		1041	-959	0
1042	-958	12.1491		1042	-958	3.38594			1042	-958	0		1042	-958	0
1043	-957	12.7377		1043	-957	3.38594			1043	-957	0		1043	-957	0
1044	-956	12.7377		1044	-956	3.38594			1044	-956	0		1044	-956	0
1045	-955	12.1491		1045	-955	3.38594			1045	-955	0		1045	-955	0
1046	-954	12.7377		1046	-954	3.38594			1046	-954	0		1046	-954	0
1047	-953	12.1491		1047	-953	3.38594			1047	-953	0		1047	-953	0
1048	-952	12.785		1048	-952	3.38594			1048	-952	0		1048	-952	0
1049	-951	12.1491		1049	-951	3.38594			1049	-951	0		1049	-951	0
1050	-950	11.5606		1050	-950	3.38594			1050	-950	0		1050	-950	0
1051	-949	11.5606		1051	-949	3.38594			1051	-949	0		1051	-949	0
1052	-948	10.9248		1052	-948	8.75478			1052	-948	0		1052	-948	0
1053	-947	10.3362		1053	-947	8.41824			1053	-947	0		1053	-947	0
1054	-946	9.74773		1054	-946	7.83838			1054	-946	0		1054	-946	0
1055	-945	9.74773		1055	-945	7.83838			1055	-945	0		1055	-945	0
1056	-944	9.20658		1056	-944	8.66156			1056	-944	0		1056	-944	0
1057	-943	8.61807		1057	-943	9.24142			1057	-943	0		1057	-943	0
1058	-942	8.57071		1058	-942	9.82128			1058	-942	0		1058	-942	0
1059	-941	11.0195		1059	-941	9.82128			1059	-941	0		1059	-941	0
1060	-940	11.0195		1060	-940	11.5609			1060	-940	0		1060	-940	0
1061	-939	11.0195		1061	-939	12.1407			1061	-939	0		1061	-939	0
1062	-938	11.0195		1062	-938	12.1407			1062	-938	0		1062	-938	0
1063	-937	11.0195		1063	-937	11.3175			1063	-937	0		1063	-937	0
1064	-936	11.6554		1064	-936	12.1407			1064	-936	0		1064	-936	0
1065	-935	11.0668		1065	-935	9.09132			1065	-935	0		1065	-935	0
1066	-934	10.431		1066	-934	9.09132			1066	-934	0		1066	-934	0
1067	-933	10.431		1067	-933	8.26814			1067	-933	0		1067	-933	0
1068	-932	8.02956		1068	-932	8.26814			1068	-932	0		1068	-932	0
1069	-931	8.02956		1069	-931	8.26814			1069	-931	0		1069	-931	0
1070	-930	8.02956		1070	-930	8.26814			1070	-930	0		1070	-930	0
1071	-929	8.02956		1071	-929	8.26814			1071	-929	0		1071	-929	0
1072	-928	8.02956		1072	-928	7.68828			1072	-928	0		1072	-928	0
1073	-927	8.02956		1073	-927	7.10842			1073	-927	0		1073	-927	0
1074	-926	8.02956		1074	-926	7.68828			1074	-926	0		1074	-926	0
1075	-925	8.02956		1075	-925	7.68828			1075	-925	0		1075	-925	0
1076	-924	8.02956		1076	-924	7.68828			1076	-924	0		1076	-924	0
1077	-923	8.02956		1077	-923	7.68828			1077	-923	0		1077	-923	0
1078	-922	8.02956		1078	-922	7.68828			1078	-922	0		1078	-922	0
1079	-921	8.02956		1079	-921	7.68828			1079	-921	0		1079	-921	0
1080	-920	8.02956		1080	-920	6.8651			1080	-920	0		1080	-920	0
1081	-919	8.02956		1081	-919	6.8651			1081	-919	0		1081	-919	0
1082	-918	8.02956		1082	-918	5.46206			1082	-918	0		1082	-918	0
1083	-917	8.02956		1083	-917	5.46206			1083	-917	0		1083	-917	0
1084	-916	8.02956		1084	-916	5.46206			1084	-916	0		1084	-916	0
1085	-915	8.02956		1085	-915	5.46206			1085	-915	0		1085	-915	0
1086	-914	8.02956		1086	-914	4.63888			1086	-914	0		1086	-914	0
1087	-913	8.02956		1087	-913	4.63888			1087	-913	0		1087	-913	0
1088	-912	8.02956		1088	-912	4.63888			1088	-912	0		1088	-912	0
1089	-911	8.02956		1089	-911	4.63888			1089	-911	0		1089	-911	0
1090	-910	8.02956		1090	-910	4.63888			1090	-910	0		1090	-910	0
1091	-909	8.02956		1091	-909	4.63888			1091	-909	0		1091	-909	0
1092	-908	8.02956		1092	-908	4.63888			1092	-908	0		1092	-908	0
1093	-907	8.02956		1093	-907	4.63888			1093	-907	0		1093	-907	0
1094	-906	8.02956		1094	-906	4.63888			1094	-906	0		1094	-906	0
1095	-905	8.02956		1095	-905	4.63888			1095	-905	0		1095	-905	0
1096	-904	8.02956		1096	-904	4.63888			1096	-904	0		1096	-904	0
1097	-903	8.02956		1097	-903	4.63888			1097	-903	0		1097	-903	0
1098	-902	8.02956		1098	-902	4.63888			1098	-902	0		1098	-902	0
1099	-901	8.02956		1099	-901	4.63888			1099	-901	0		1099	-901	0
1100	-900	8.02956		1100	-900	4.63888			1100	-900	0		1100	-900	0
1101	-899	8.02956		1101	-899	4.63888			1101	-899	0		1101	-899	0
1102	-898	8.02956		1102	-898	4.63888			1102	-898	0		1102	-898	0
1103	-897	8.02956		1103	-897	4.63888			1103	-897	0		1103	-897	0
1104	-896	8.02956		1104	-896	4.63888			1104	-896	0		1104	-896	0
1105	-895	8.02956		1105	-895	4.63888			1105	-895	0		1105	-895	0
1106	-894	8.02956		1106	-894	4.63888			1106	-894	0		1106	-894	0
1107	-893	8.02956		1107	-893	4.63888			1107	-893	0		1107	-893	0
1108	-892	8.02956		1108	-892	4.63888			1108	-892	0		1108	-892	0
1109	-891	8.02956		1109	-891	4.63888			1109	-891	0		1109	-891	0
1110	-890	8.02956		1110	-890	4.63888			1110	-890	0		1110	-890	0
1111	-889	8.02956		1111	-889	4.63888			1111	-889	0		1111	-889	0
1112	-888	8.02956		1112	-888	4.63888			1112	-888	0		1112	-888	0
1113	-887	8.02956		1113	-887	4.63888			1113	-887	0		1113	-887	0
1114	-886	8.02956		1114	-886	4.63888			1114	-886	0		1114	-886	0
1115	-885	8.02956		1115	-885	4.63888			1115	-885	0		1115	-885	0
1116	-884	8.02956		1116	-884	4.63888			1116	-884	0		1116	-884	0
1117	-883	8.02956		1117	-883	4.63888			1117	-883	0		1117	-883	0
1118	-882	8.02956		1118	-882	4.63888			1118	-882	0		1118	-882	0
1119	-881	8.02956		1119	-881	4.63888			1119	-881	0		1119	-881	0
1120	-880	8.02956		1120	-880	4.63888			1120	-880	0		1120	-880	0
1121	-879	8.02956		1121	-879	4.63888			1121	-879	0		1121	-879	0
1122	-878	8.02956		1122	-878	4.63888			1122	-878	0		1122	-878	0
1123	-877	8.02956		1123	-877	4.63888			1123	-877	0		1123	-877	0
1124	-876	8.02956		1124	-876	4.63888			1124	-876	0		1124	-876	0
1125	-875	8.02956		1125	-875	4.63888			1125	-875	0		1125	-875	0
1126	-874	8.02956		1126	-874	4.63888			1126	-874	0		1126	-874	0
1127	-873	8.02956		1127	-873	4.63888			1127	-873	0		1127	-873	0
1128	-872	8.02956		1128	-872	4.63888			1128	-872	0		1128	-872	0
1129	-871	8.02956		1129	-871	4.63888			1129	-871	0		1129	-871	0
1130	-870	8.02956		1130	-870	4.63888			1130	-870	0		1130	-870	0
1131	-869	8.02956		1131	-869	4.63888			1131	-869	0		1131	-869	0
1132	-868	8.02956		1132	-868	4.63888			1132	-868	0		1132	-868	0
1133	-867	8.02956		1133	-867	4.63888			1133	-867	0		1133	-867	0
1134	-866	8.02956		1134	-866	4.63888			1134	-866	0		1134	-866	0
1135	-865	8.02956		1135	-865	4.63888			1135	-865	0		1135	-865	0
1136	-864	8.02956		1136	-864	4.63888			1136	-864	0		1136	-864	0
1137	-863	8.02956		1137	-863	4.63888			1137	-863	0		1137	-863	0
1138	-862	8.02956		1138	-862	4.63888			1138	-862	0		1138	-862	0
1139	-861	8.02956		1139	-861	4.63888			1139	-861	0		1139	-861	0
1140	-860	8.02956		1140	-860	4.63888			1140	-860	0		1140	-860	0
1141	-859	8.02956		1141	-859	4.63888			1141	-859	0		1141	-859	0
1142	-858	8.02956		1142	-858	4.63888			1142	-858	0		1142	-858	0
1143	-857	8.02956		1143	-857	4.63888			1143	-857	0		1143	-857	0
1144	-856	8.02956		1144	-856	4.63888			1144	-856	0		1144	-856	0
1145	-855	8.02956		1145	-855	4.63888			1145	-855	0		1145	-855	0
1146	-854	8.02956		1146	-854	4.63888			1146	-854	0		1146	-854	0
1147	-853	8.02956		1147	-853	4.63888			1147	-853	0		1147	-853	0
1148	-852	8.02956		1148	-852	4.63888			1148	-852	0		1148	-852	0
1149	-851	8.02956		1149	-851	4.63888			1149	-851	0		1149	-851	0
1150	-850	8.02956		1150	-850	4.63888			1150	-850	0		1150	-850	0
1151	-849	8.02956		1151	-849	4.63888			1151	-849	0		1151	-849	0
1152	-848	8.02956		1152	-848	4.63888			1152	-848	0		1152	-848	0
1153	-847	8.02956		1153	-847	4.63888			1153	-847	0		1153	-847	0
1154	-846	8.02956		1154	-846	4.63888			1154	-846	0		1154	-846	0
1155	-845	8.02956		1155	-845	4.63888			1155	-845	0		1155	-845	0
1156	-844	8.02956		1156	-844	4.63888			1156	-844	0		1156	-844	0
1157	-843	8.02956		1157	-843	4.63888			1157	-843	0		1157	-843	0
1158	-842	8.02956		1158	-842	4.63888			1158	-842	0		1158	-842	0
1159	-841	8.02956		1159	-841	4.63888			1159	-841	0		1159	-841	0
1160	-840	8.02956		1160	-840	4.63888			1160	-840	0		1160	-840	0
1161	-839	8.02956		1161	-839	4.63888			1161	-839	0		1161	-839	0
1162	-838	8.02956		1162	-838	4.63888			1162	-838	0		1162	-838	0
1163	-837	8.02956		1163	-837	4.63888			1163	-837	0		1163	-837	0
1164	-836	8.02956		1164	-836	4.63888			1164	-836	0		1164	-836	0
1165	-835	8.02956		1165	-835	4.63888			1165	-835	0		1165	-835	0
1166	-834	8.02956		1166	-834	4.63888			1166	-834	0		1166	-834	0
1167	-833	8.02956		1167	-833	4.63888			1167	-833	0		1167	-833	0
1168	-832	8.02956		1168	-832	4.63888			1168	-832	0		1168	-832	0
1169	-831	8.02956		1169	-831	4.63888			1169	-831	0		1169	-831	0
1170	-830	8.02956		1170	-830	4.63888			1170	-830	0		1170	-830	0
1171	-829	8.02956		1171	-829	4.63888			1171	-829	0		1171	-829	0
1172	-828	8.02956		1172	-828	4.63888			1172	-828	0		1172	-828	0
1173	-827	8.02956		1173	-827	4.63888			1173	-827	0		1173	-827	0
1174	-826	8.02956		1174	-826	4.63888			1174	-826	0		1174	-826	0
1175	-825	8.02956		1175	-825	4.63888			1175	-825	0		1175	-825	0
1176	-824	8.02956		1176	-824	4.63888			1176	-824	0		1176	-824	0
1177	-823	8.02956		1177	-823	4.63888			1177	-823	0		1177	-823	0
1178	-822	8.02956		1178	-822	4.63888			1178	-822	0		1178	-822	0
1179	-821	8.02956		1179	-821	4.63888			1179	-821	0		1179	-821	0
1180	-820	8.02956		1180	-820	4.63888			1180	-820	0		1180	-820	0
1181	-819	8.02956		1181	-819	4.63888			1181	-819	0		1181	-819	0
1182	-818	8.02956		1182	-818	4.63888			1182	-818	0		1182	-818	0
1183	-817	8.02956		1183	-817	4.63888			1183	-817	0		1183	-817	0
1184	-816	8.02956		1184	-816	4.63888			1184	-816	0		1184	-816	0
1185	-815	8.02956		1185	-815	4.63888			1185	-815	0		1185	-815	0
1186	-814	8.02956		1186	-814	4.63888			1186	-814	0		1186	-814	0
1187	-813	8.02956		1187	-813	4.63888			1187	-813	0		1187	-813	0
1188	-812	8.02956		1188	-812	4.63888			1188	-812	0		1188	-812	0
1189	-811	8.02956		1189	-811	4.63888			1189	-811	0		1189	-811	0
1190	-810	8.02956		1190	-810	4.63888			1190	-810	0		1190	-810	0
1191	-809	8.02956		1191	-809	4.63888			1191	-809	0		1191	-809	0
1192	-808	8.02956		1192	-808	4.63888			1192	-808	0		1192	-808	0
1193	-807	8.02956		1193	-807	4.63888			1193	-807	0		1193	-807	0
1194	-806	8.02956		1194	-806	4.63888			1194	-806	0		1194	-806	0
1195	-805	8.02956		1195	-805	4.63888			1195	-805	0		1195	-805	0
1196	-804	8.02956		1196	-804	4.63888			1196	-804	0		1196	-804	0
1197	-803	8.02956		1197	-803	4.63888			1197	-803	0		1197	-803	0
1198	-802	8.02956		1198	-802	4.63888			1198	-802	0		1198	-802	0
1199	-801	8.02956		1199	-801	4.63888			1199	-801	0		1199	-801	0
1200	-800	8.02956		1200	-800	4.63888			1200	-800	0		1200	-800	0
1201	-799	8.02956		1201	-799	4.63888			1201	-799	0		1201	-799	0
1202	-798	8.02956		1202	-798	4.63888			1202	-798	0		1202	-798	0
1203	-797	8.02956		1203	-797	4.63888			1203	-797	0		1203	-797	0
1204	-796	8.02956		1204	-796	4.63888			1204	-796	0		1204	-796	0
1205	-795	8.02956		1205	-795	4.63888			1205	-795	0		1205	-795	0
1206	-794	8.02956		1206	-794	4.63888			1206	-794	0		1206	-794	0
1207	-793	8.02956		1207	-793	4.63888			1207	-793	0		1207	-793	0
1208	-792	8.02956		1208	-792	4.63888			1208	-792	0		1208	-792	0
1209	-791	8.02956		1209	-791	4.63888			1209	-791	0		1209	-791	0
1210	-790	8.02956		1210	-790	4.63888			1210	-790	0		1210	-790	0
1211	-789	8.02956		1211	-789	4.63888			1211	-789	0		1211	-789	0
1212	-788	8.02956		1212	-788	4.63888			1212	-788	0		1212	-788	0
1213	-787	8.02956		1213	-787	4.63888			1213	-787	0		1213	-787	0
1214	-786	8.02956		1214	-786	4.63888			1214	-786	0		1214	-786	0
1215	-785	8.02956		1215	-785	4.63888			1215	-785	0		1215	-785	0
1216	-784	8.02956		1216	-784	4.63888			1216	-784	0		1216	-784	0
1217	-783	8.02956		1217	-783	4.63888			1217	-783	0		1217	-783	0
1218	-782	8.02956		1218	-782	4.63888			1218	-782	0		1218	-782	0
1219	-781	8.02956		1219	-781	4.63888			1219	-781	0		1219	-781	0
1220	-780	8.02956		1220	-780	4.63888			1220	-780	0		1220	-780	0
1221	-779	8.02956		1221	-779	4.63888			1221	-779	0		1221	-779	0
1222	-778	8.02956		1222	-778	4.63888			1222	-778	0		1222	-778	0
1223	-777	8.02956		1223	-777	4.63888			1223	-777	0		1223	-777	0
1224	-776	8.02956		1224	-776	4.63888			1224	-776	0		1224	-776	0
1225	-775	8.02956		1225	-775	4.63888			1225	-775	0		1225	-775	0
1226	-774	8.02956		1226	-774	0.823179			1226	-774	0		1226	-774	0
1227	-773	8.02956		1227	-773	0.823179			1227	-773	0		1227	-773	0
1228	-772	1.22439		1228	-772	1.64636			1228	-772	0		1228	-772	0
1229	-771	1.22439		1229	-771	1.64636			1229	-771	0		1229	-771	0
1230	-770	3.13201		1230	-770	2.46954			1230	-770	0		1230	-770	0
1231	-769	9.88982		1231	-769	4.93908			1231	-769	0		1231	-769	0
1232	-768	12.8797		1232	-768	9.97138			1232	-768	0		1232	-768	0
1233	-767	23.3107		1233	-767	13.0208			1233	-767	0		1233	-767	0
1234	-766	23.3107		1234	-766	15.3402			1234	-766	0		1234	-766	0
1235	-765	23.9466		1235	-765	15.3402			1235	-765	0		1235	-765	0
1236	-764	23.9466		1236	-764	15.3402			1236	-764	0		1236	-764	0
1237	-763	23.9466		1237	-763	15.3402			1237	-763	0		1237	-763	0
1238	-762	23.9466		1238	-762	15.3402			1238	-762	0		1238	-762	0
1239	-761	23.9466		1239	-761	15.3402			1239	-761	0		1239	-761	0
1240	-760	23.9466		1240	-760	15.3402			1240	-760	0		1240	-760	0
1241	-759	23.9466		1241	-759	15.3402			1241	-759	0		1241	-759	0
1242	-758	23.9466		1242	-758	15.3402			1242	-758	0		1242	-758	0
1243	-757	23.9466		1243	-757	15.3402			1243	-757	0		1243	-757	0
1244	-756	23.9466		1244	-756	15.3402			1244	-756	0		1244	-756	0
1245	-755	23.3581		1245	-755	15.3402			1245	-755	0		1245	-755	0
1246	-754	23.9466		1246	-754	15.3402			1246	-754	0		1246	-754	0
1247	-753	23.9466		1247	-753	15.3402			1247	-753	0		1247	-753	0
1248	-752	23.9466		1248	-752	15.3402			1248	-752	0		1248	-752	0
1249	-751	23.9466		1249	-751	15.3402			1249	-751	0		1249	-751	0
1250	-750	22.7222		1250	-750	15.3402			1250	-750	0		1250	-750	0
1251	-749	23.3107		1251	-749	15.3402			1251	-749	0		1251	-749	0
1252	-748	23.9466		1252	-748	14.517			1252	-748	0		1252	-748	0
1253	-747	22.6748		1253	-747	14.517			1253	-747	0		1253	-747	0
1254	-746	23.9466		1254	-746	14.517			1254	-746	0		1254	-746	0
1255	-745	23.9466		1255	-745	14.517			1255	-745	0		1255	-745	0
1256	-744	23.9466		1256	-744	14.517			1256	-744	0		1256	-744	0
1257	-743	23.9466		1257	-743	14.517			1257	-743	0		1257	-743	0
1258	-742	23.9466		1258	-742	14.517			1258	-742	0		1258	-742	0
1259	-741	23.9466		1259	-741	14.517			1259	-741	0		1259	-741	0
1260	-740	23.9466		1260	-740	14.517			1260	-740	0		1260	-740	0
1261	-739	22.6748		1261	-739	14.517			1261	-739	0		1261	-739	0
1262	-738	23.3107		1262	-738	14.517			1262	-738	0		1262	-738	0
1263	-737	22.7222		1263	-737	14.517			1263	-737	0		1263	-737	0
1264	-736	22.0863		1264	-736	10.6445			1264	-736	0		1264	-736	0
1265	-735	22.0863		1265	-735	3.38594			1265	-735	0		1265	-735	0
1266	-734	19.5902		1266	-734	2.80608			1266	-734	0		1266	-734	0
1267	-733	20.1787		1267	-733	2.22622			1267	-733	0		1267	-733	0
1268	-732	6.71045		1268	-732	1.40304			1268	-732	0		1268	-732	0
1269	-731	7.84011		1269	-731	1.40304			1269	-731	0		1269	-731	0
1270	-730	4.16694		1270	-730	1.40304			1270	-730	0		1270	-730	0
1271	-729	4.16694		1271	-729	1.40304			1271	-729	0		1271	-729	0
1272	-728	4.16694		1272	-728	1.40304			1272	-728	0		1272	-728	0
1273	-727	4.16694		1273	-727	1.40304			1273	-727	0		1273	-727	0
1274	-726	4.16694		1274	-726	1.40304			1274	-726	0		1274	-726	0
1275	-725	4.16694		1275	-725	1.40304			1275	-725	0		1275	-725	0
1276	-724	4.16694		1276	-724	1.40304			1276	-724	0		1276	-724	0
1277	-723	4.16694		1277	-723	1.40304			1277	-723	0		1277	-723	0
1278	-722	4.16694		1278	-722	1.40304			1278	-722	0		1278	-722	0
1279	-721	4.80282		1279	-721	1.40304			1279	-721	0		1279	-721	0
1280	-720	4.80282		1280	-720	1.40304			1280	-720	0		1280	-720	0
1281	-719	4.80282		1281	-719	1.40304			1281	-719	0		1281	-719	0
1282	-718	4.80282		1282	-718	1.40304			1282	-718	0		1282	-718	0
1283	-717	4.80282		1283	-717	1.40304			1283	-717	0		1283	-717	0
1284	-716	4.80282		1284	-716	1.40304			1284	-716	0		1284	-716	0
1285	-715	4.80282		1285	-715	1.40304			1285	-715	0		1285	-715	0
1286	-714	4.80282		1286	-714	1.40304			1286	-714	0		1286	-714	0
1287	-713	4.80282		1287	-713	1.40304			1287	-713	0		1287	-713	0
1288	-712	4.80282		1288	-712	1.40304			1288	-712	0		1288	-712	0
1289	-711	4.80282		1289	-711	1.40304			1289	-711	0		1289	-711	0
1290	-710	4.80282		1290	-710	1.40304			1290	-710	0		1290	-710	0
1291	-709	4.80282		1291	-709	1.40304			1291	-709	0		1291	-709	0
1292	-708	4.80282		1292	-708	1.40304			1292	-708	0		1292	-708	0
1293	-707	4.80282		1293	-707	1.40304			1293	-707	0		1293	-707	0
1294	-706	4.80282		1294	-706	1.40304			1294	-706	0		1294	-706	0
1295	-705	4.80282		1295	-705	1.40304			1295	-705	0		1295	-705	0
1296	-704	4.80282		1296	-704	1.40304			1296	-704	0		1296	-704	0
1297	-703	4.80282		1297	-703	1.40304			1297	-703	0		1297	-703	0
1298	-702	4.80282		1298	-702	1.40304			1298	-702	0		1298	-702	0
1299	-701	4.80282		1299	-701	1.40304			1299	-701	0		1299	-701	0
1300	-700	4.80282		1300	-700	1.40304			1300	-700	0		1300	-700	0
1301	-699	4.80282		1301	-699	1.40304			1301	-699	0		1301	-699	0
1302	-698	4.80282		1302	-698	1.40304			1302	-698	0		1302	-698	0
1303	-697	4.80282		1303	-697	1.40304			1303	-697	0		1303	-697	0
1304	-696	4.80282		1304	-696	1.40304			1304	-696	0		1304	-696	0
1305	-695	4.80282		1305	-695	1.40304			1305	-695	0		1305	-695	0
1306	-694	4.80282		1306	-694	1.40304			1306	-694	0		1306	-694	0
1307	-693	4.80282		1307	-693	1.40304			1307	-693	0		1307	-693	0
1308	-692	4.80282		1308	-692	1.40304			1308	-692	0		1308	-692	0
1309	-691	4.80282		1309	-691	1.40304			1309	-691	0		1309	-691	0
1310	-690	4.80282		1310	-690	1.40304			1310	-690	0		1310	-690	0
1311	-689	4.80282		1311	-689	1.40304			1311	-689	0		1311	-689	0
1312	-688	4.80282		1312	-688	1.40304			1312	-688	0		1312	-688	0
1313	-687	4.80282		1313	-687	1.40304			1313	-687	0		1313	-687	0
1314	-686	4.80282		1314	-686	1.40304			1314	-686	0		1314	-686	0
1315	-685	4.80282		1315	-685	1.40304			1315	-685	0		1315	-685	0
1316	-684	4.80282		1316	-684	1.40304			1316	-684	0		1316	-684	0
1317	-683	4.80282		1317	-683	1.40304			1317	-683	0		1317	-683	0
1318	-682	4.80282		1318	-682	1.40304			1318	-682	0		1318	-682	0
1319	-681	4.80282		1319	-681	1.40304			1319	-681	0		1319	-681	0
1320	-680	4.80282		1320	-680	1.40304			1320	-680	0		1320	-680	0
1321	-679	4.80282		1321	-679	1.40304			1321	-679	0		1321	-679	0
1322	-678	4.80282		1322	-678	1.40304			1322	-678	0		1322	-678	0
1323	-677	4.80282		1323	-677	1.40304			1323	-677	0		1323	-677	0
1324	-676	4.80282		1324	-676	1.40304			1324	-676	0		1324	-676	0
1325	-675	4.80282		1325	-675	1.40304			1325	-675	0		1325	-675	0
1326	-674	4.80282		1326	-674	1.40304			1326	-674	0		1326	-674	0
1327	-673	4.80282		1327	-673	1.40304			1327	-673	0		1327	-673	0
1328	-672	4.80282		1328	-672	1.40304			1328	-672	0		1328	-672	0
1329	-671	4.80282		1329	-671	1.40304			1329	-671	0		1329	-671	0
1330	-670	4.80282		1330	-670	1.40304			1330	-670	0		1330	-670	0
1331	-669	4.80282		1331	-669	1.40304			1331	-669	0		1331	-669	0
1332	-668	4.80282		1332	-668	1.40304			1332	-668	0		1332	-668	0
1333	-667	4.80282		1333	-667	1.40304			1333	-667	0		1333	-667	0
1334	-666	4.80282		1334	-666	1.40304			1334	-666	0		1334	-666	0
1335	-665	4.80282		1335	-665	1.40304			1335	-665	0		1335	-665	0
1336	-664	4.80282		1336	-664	1.40304			1336	-664	0		1336	-664	0
1337	-663	4.80282		1337	-663	1.40304			1337	-663	0		1337	-663	0
1338	-662	4.80282		1338	-662	1.40304			1338	-662	0		1338	-662	0
1339	-661	4.80282		1339	-661	1.40304			1339	-661	0		1339	-661	0
1340	-660	4.80282		1340	-660	1.40304			1340	-660	0		1340	-660	0
1341	-659	4.80282		1341	-659	1.40304			1341	-659	0		1341	-659	0
1342	-658	4.80282		1342	-658	1.40304			1342	-658	0		1342	-658	0
1343	-657	4.80282		1343	-657	1.40304			1343	-657	0		1343	-657	0
1344	-656	4.80282		1344	-656	1.40304			1344	-656	0		1344	-656	0
1345	-655	4.80282		1345	-655	1.40304			1345	-655	0		1345	-655	0
1346	-654	4.80282		1346	-654	1.40304			1346	-654	0		1346	-654	0
1347	-653	4.80282		1347	-653	1.40304			1347	-653	0		1347	-653	0
1348	-652	4.80282		1348	-652	1.40304			1348	-652	0		1348	-652	0
1349	-651	4.80282		1349	-651	1.40304			1349	-651	0		1349	-651	0
1350	-650	4.80282		1350	-650	1.40304			1350	-650	0		1350	-650	0
1351	-649	4.80282		1351	-649	1.40304			1351	-649	0		1351	-649	0
1352	-648	4.80282		1352	-648	1.40304			1352	-648	0		1352	-648	0
1353	-647	4.80282		1353	-647	1.40304			1353	-647	0		1353	-647	0
1354	-646	4.80282		1354	-646	1.40304			1354	-646	0		1354	-646	0
1355	-645	4.80282		1355	-645	1.40304			1355	-645	0		1355	-645	0
1356	-644	4.80282		1356	-644	1.40304			1356	-644	0		1356	-644	0
1357	-643	4.80282		1357	-643	1.40304			1357	-643	0		1357	-643	0
1358	-642	4.80282		1358	-642	1.40304			1358	-642	0		1358	-642	0
1359	-641	4.80282		1359	-641	1.40304			1359	-641	0		1359	-641	0
1360	-640	4.80282		1360	-640	1.40304			1360	-640	0		1360	-640	0
1361	-639	4.80282		1361	-639	1.40304			1361	-639	0		1361	-639	0
1362	-638	4.80282		1362	-638	1.40304			1362	-638	0		1362	-638	0
1363	-637	4.80282		1363	-637	1.40304			1363	-637	0		1363	-637	0
1364	-636	4.80282		1364	-636	1.40304			1364	-636	0		1364	-636	0
1365	-635	4.80282		1365	-635	1.40304			1365	-635	0		1365	-635	0
1366	-634	4.80282		1366	-634	1.40304			1366	-634	0		1366	-634	0
1367	-633	4.80282		1367	-633	1.40304			1367	-633	0		1367	-633	0
1368	-632	4.80282		1368	-632	1.40304			1368	-632	0		1368	-632	0
1369	-631	4.80282		1369	-631	1.40304			1369	-631	0		1369	-631	0
1370	-630	4.80282		1370	-630	1.40304			1370	-630	0		1370	-630	0
1371	-629	4.80282		1371	-629	1.40304			1371	-629	0		1371	-629	0
1372	-628	4.80282		1372	-628	1.40304			1372	-628	0		1372	-628	0
1373	-627	4.80282		1373	-627	1.40304			1373	-627	0		1373	-627	0
1374	-626	4.80282		1374	-626	1.40304			1374	-626	0		1374	-626	0
1375	-625	4.80282		1375	-625	1.40304			1375	-625	0		1375	-625	0
1376	-624	4.80282		1376	-624	1.40304			1376	-624	0		1376	-624	0
1377	-623	4.80282		1377	-623	1.40304			1377	-623	0		1377	-623	0
1378	-622	4.80282		1378	-622	1.40304			1378	-622	0		1378	-622	0
1379	-621	4.80282		1379	-621	1.40304			1379	-621	0		1379	-621	0
1380	-620	4.80282		1380	-620	1.40304			1380	-620	0		1380	-620	0
1381	-619	4.80282		1381	-619	1.40304			1381	-619	0		1381	-619	0
1382	-618	4.80282		1382	-618	1.40304			1382	-618	0		1382	-618	0
1383	-617	4.80282		1383	-617	1.40304			1383	-617	0		1383	-617	0
1384	-616	4.80282		1384	-616	1.40304			1384	-616	0		1384	-616	0
1385	-615	4.80282		1385	-615	1.40304			1385	-615	0		1385	-615	0
1386	-614	4.80282		1386	-614	1.40304			1386	-614	0		1386	-614	0
1387	-613	4.80282		1387	-613	1.40304			1387	-613	0		1387	-613	0
1388	-612	4.80282		1388	-612	1.40304			1388	-612	0		1388	-612	0
1389	-611	4.80282		1389	-611	1.40304			1389	-611	0		1389	-611	0
1390	-610	4.80282		1390	-610	1.40304			1390	-610	0		1390	-610	0
1391	-609	4.80282		1391	-609	1.40304			1391	-609	0		1391	-609	0
1392	-608	4.80282		1392	-608	1.40304			1392	-608	0		1392	-608	0
1393	-607	4.80282		1393	-607	1.40304			1393	-607	0		1393	-607	0
1394	-606	4.80282		1394	-606	1.40304			1394	-606	0		1394	-606	0
1395	-605	4.80282		1395	-605	1.40304			1395	-605	0		1395	-605	0
1396	-604	4.80282		1396	-604	1.40304			1396	-604	0		1396	-604	0
1397	-603	4.80282		1397	-603	1.40304			1397	-603	0		1397	-603	0
1398	-602	4.80282		1398	-602	1.40304			1398	-602	0		1398	-602	0
1399	-601	4.80282		1399	-601	1.40304			1399	-601	0		1399	-601	0
1400	-600	4.80282		1400	-600	1.40304			1400	-600	0		1400	-600	0
1401	-599	4.80282		1401	-599	1.40304			1401	-599	0		1401	-599	0
1402	-598	4.80282		1402	-598	1.40304			1402	-598	0		1402	-598	0
1403	-597	4.80282		1403	-597	1.40304			1403	-597	0		1403	-597	0
1404	-596	4.80282		1404	-596	1.40304			1404	-596	0		1404	-596	0
1405	-595	4.80282		1405	-595	1.40304			1405	-595	0		1405	-595	0
1406	-594	4.80282		1406	-594	1.40304			1406	-594	0		1406	-594	0
1407	-593	4.80282		1407	-593	1.40304			1407	-593	0		1407	-593	0
1408	-592	4.80282		1408	-592	1.40304			1408	-592	0		1408	-592	0
1409	-591	4.80282		1409	-591	1.40304			1409	-591	0		1409	-591	0
1410	-590	4.80282		1410	-590	1.40304			1410	-590	0		1410	-590	0
1411	-589	4.80282		1411	-589	1.40304			1411	-589	0		1411	-589	0
1412	-588	4.80282		1412	-588	1.40304			1412	-588	0		1412	-588	0
1413	-587	4.80282		1413	-587	1.40304			1413	-587	0		1413	-587	0
1414	-586	4.80282		1414	-586	1.40304			1414	-586	0		1414	-586	0
1415	-585	4.80282		1415	-585	1.40304			1415	-585	0		1415	-585	0
1416	-584	4.80282		1416	-584	1.40304			1416	-584	0		1416	-584	0
1417	-583	4.80282		1417	-583	1.40304			1417	-583	0		1417	-583	0
1418	-582	4.80282		1418	-582	1.40304			1418	-582	0		1418	-582	0
1419	-581	4.80282		1419	-581	1.40304			1419	-581	0		1419	-581	0
1420	-580	4.80282		1420	-580	1.40304			1420	-580	0		1420	-580	0
1421	-579	4.80282		1421	-579	1.40304			1421	-579	0		1421	-579	0
1422	-578	4.80282		1422	-578	1.40304			1422	-578	0		1422	-578	0
1423	-577	4.80282		1423	-577	1.40304			1423	-577	0		1423	-577	0
1424	-576	4.80282		1424	-576	1.40304			1424	-576	0		1424	-576	0
1425	-575	4.80282		1425	-575	1.40304			1425	-575	0		1425	-575	0
1426	-574	4.80282		1426	-574	1.40304			1426	-574	0		1426	-574	0
1427	-573	4.80282		1427	-573	1.40304			1427	-573	0		1427	-573	0
1428	-572	4.80282		1428	-572	1.40304			1428	-572	0		1428	-572	0
1429	-571	4.80282		1429	-571	1.40304			1429	-571	0		1429	-571	0
1430	-570	4.80282		1430	-570	1.40304			1430	-570	0		1430	-570	0
1431	-569	4.80282		1431	-569	1.40304			1431	-569	0		1431	-569	0
1432	-568	4.80282		1432	-568	1.40304			1432	-568	0		1432	-568	0
1433	-567	4.80282		1433	-567	1.40304			1433	-567	0		1433	-567	0
1434	-566	4.80282		1434	-566	1.40304			1434	-566	0		1434	-566	0
1435	-565	4.80282		1435	-565	1.40304			1435	-565	0		1435	-565	0
1436	-564	4.80282		1436	-564	1.40304			1436	-564	0		1436	-564	0
1437	-563	4.80282		1437	-563	1.40304			1437	-563	0		1437	-563	0
1438	-562	4.80282		1438	-562	1.40304			1438	-562	0		1438	-562	0
1439	-561	4.80282		1439	-561	1.40304			1439	-561	0		1439	-561	0
1440	-560	4.80282		1440	-560	1.40304			1440	-560	0		1440	-560	0
1441	-559	4.80282		1441	-559	1.40304			1441	-559	0		1441	-559	0
1442	-558	4.80282		1442	-558	1.40304			1442	-558	0		1442	-558	0
1443	-557	4.80282		1443	-557	1.40304			1443	-557	0		1443	-557	0
1444	-556	4.80282		1444	-556	1.40304			1444	-556	0		1444	-556	0
1445	-555	4.80282		1445	-555	1.40304			1445	-555	0		1445	-555	0
1446	-554	4.80282		1446	-554	1.40304			1446	-554	0		1446	-554	0
1447	-553	4.80282		1447	-553	1.40304			1447	-553	0		1447	-553	0
1448	-552	4.80282		1448	-552	1.40304			1448	-552	0		1448	-552	0
1449	-551	4.80282		1449	-551	1.40304			1449	-551	0		1449	-551	0
1450	-550	4.80282		1450	-550	1.40304			1450	-550	0		1450	-550	0
1451	-549	4.80282		1451	-549	1.40304			1451	-549	0		1451	-549	0
1452	-548	4.80282		1452	-548	1.40304			1452	-548	0		1452	-548	0
1453	-547	4.80282		1453	-547	1.40304			1453	-547	0		1453	-547	0
1454	-546	4.80282		1454	-546	1.40304			1454	-546	0		1454	-546	0
1455	-545	4.80282		1455	-545	1.40304			1455	-545	0		1455	-545	0
1456	-544	4.80282		1456	-544	1.40304			1456	-544	0		1456	-544	0
1457	-543	4.80282		1457	-543	1.40304			1457	-543	0		1457	-543	0
1458	-542	4.80282		1458	-542	1.40304			1458	-542	0		1458	-542	0
1459	-541	4.80282		1459	-541	1.40304			1459	-541	0		1459	-541	0
1460	-540	4.80282		1460	-540	1.40304			1460	-540	0		1460	-540	0
1461	-539	4.80282		1461	-539	1.40304			1461	-539	0		1461	-539	0
1462	-538	4.80282		1462	-538	1.40304			1462	-538	0		1462	-538	0
1463	-537	4.80282		1463	-537	1.40304			1463	-537	0		1463	-537	0
1464	-536	4.80282		1464	-536	1.40304			1464	-536	0		1464	-536	0
1465	-535	4.80282		1465	-535	1.40304			1465	-535	0		1465	-535	0
1466	-534	4.80282		1466	-534	1.40304			1466	-534	0		1466	-534	0
1467	-533	4.80282		1467	-533	1.40304			1467	-533	0		1467	-533	0
1468	-532	4.80282		1468	-532	1.40304			1468	-532	0		1468	-532	0
1469	-531	4.80282		1469	-531	1.40304			1469	-531	0		1469	-531	0
1470	-530	4.80282		1470	-530	1.40304			1470	-530	0		1470	-530	0
1471	-529	4.80282		1471	-529	1.40304			1471	-529	0		1471	-529	0
1472	-528	4.80282		1472	-528	1.40304			1472	-528	0		1472	-528	0
1473	-527	4.80282		1473	-527	1.40304			1473	-527	0		1473	-527	0
1474	-526	4.80282		1474	-526	1.40304			1474	-526	0		1474	-526	0
1475	-525	4.80282		1475	-525	1.40304			1475	-525	0		1475	-525	0
1476	-524	4.80282		1476	-524	1.40304			1476	-524	0		1476	-524	0
1477	-523	4.80282		1477	-523	1.40304			1477	-523	0		1477	-523	0
1478	-522	4.80282		1478	-522	1.40304			1478	-522	0		1478	-522	0
1479	-521	4.80282		1479	-521	1.40304			1479	-521	0		1479	-521	0
1480	-520	4.80282		1480	-520	1.40304			1480	-520	0		1480	-520	0
1481	-519	4.80282		1481	-519	1.40304			1481	-519	0		1481	-519	0
1482	-518	4.80282		1482	-518	1.40304			1482	-518	0		1482	-518	0
1483	-517	4.80282		1483	-517	1.40304			1483	-517	0		1483	-517	0
1484	-516	4.80282		1484	-516	1.40304			1484	-516	0		1484	-516	0
1485	-515	4.80282		1485	-515	1.40304			1485	-515	0		1485	-515	0
1486	-514	4.80282		1486	-514	1.40304			1486	-514	0		1486	-514	0
1487	-513	4.80282		1487	-513	1.40304			1487	-513	0		1487	-513	0
1488	-512	4.80282		1488	-512	1.40304			1488	-512	0		1488	-512	0
1489	-511	4.80282		1489	-511	1.40304			1489	-511	0		1489	-511	0
1490	-510	4.80282		1490	-510	1.40304			1490	-510	0		1490	-510	0
1491	-509	4.80282		1491	-509	1.40304			1491	-509	0		1491	-509	0
1492	-508	4.80282		1492	-508	1.40304			1492	-508	0		1492	-508	0
1493	-507	4.80282		1493	-507	1.40304			1493	-507	0		1493	-507	0
1494	-506	4.80282		1494	-506	1.40304			1494	-506	0		1494	-506	0
1495	-505	4.80282		1495	-505	1.40304			1495	-505	0		1495	-505	0
1496	-504	4.80282		1496	-504	1.40304			1496	-504	0		1496	-504	0
1497	-503	4.80282		1497	-503	1.40304			1497	-503	0		1497	-503	0
1498	-502	4.80282		1498	-502	1.40304			1498	-502	0		1498	-502	0
1499	-501	4.80282		1499	-501	1.40304			1499	-501	0		1499	-501	0
1500	-500	4.80282		1500	-500	1.40304			1500	-500	0		1500	-500	0
1501	-499	4.80282		1501	-499	1.40304			1501	-499	0		1501	-499	0
1502	-498	4.80282		1502	-498	1.40304			1502	-498	0		1502	-498	0
1503	-497	4.80282		1503	-497	1.40304			1503	-497	0		1503	-497	0
1504	-496	4.80282		1504	-496	1.40304			1504	-496	0		1504	-496	0
1505	-495	4.80282		1505	-495	1.40304			1505	-495	0		1505	-495	0
1506	-494	4.80282		1506	-494	1.40304			1506	-494	0		1506	-494	0
1507	-493	4.80282		1507	-493	1.40304			1507	-493	0		1507	-493	0
1508	-492	4.80282		1508	-492	1.40304			1508	-492	0		1508	-492	0
1509	-491	4.80282		1509	-491	1.40304			1509	-491	0		1509	-491	0
1510	-490	4.80282		1510	-490	1.40304			1510	-490	0		1510	-490	0
1511	-489	4.80282		1511	-489	1.40304			1511	-489	0		1511	-489	0
1512	-488	4.80282		1512	-488	1.40304			1512	-488	0		1512	-488	0
1513	-487	4.80282		1513	-487	1.40304			1513	-487	0		1513	-487	0
1514	-486	4.80282		1514	-486	1.40304			1514	-486	0		1514	-486	0
1515	-485	4.80282		1515	-485	1.40304			1515	-485	0		1515	-485	0
1516	-484	4.80282		1516	-484	1.40304			1516	-484	0		1516	-484	0
1517	-483	4.80282		1517	-483	1.40304			1517	-483	0		1517	-483	0
1518	-482	4.80282		1518	-482	1.40304			1518	-482	0		1518	-482	0
1519	-481	4.80282		1519	-481	1.40304			1519	-481	0		1519	-481	0
1520	-480	4.80282		1520	-480	1.40304			1520	-480	0		1520	-480	0
1521	-479	4.80282		1521	-479	1.40304			1521	-479	0		1521	-479	0
1522	-478	4.80282		1522	-478	1.40304			1522	-478	0		1522	-478	0
1523	-477	4.80282		1523	-477	1.40304			1523	-477	0		1523	-477	0
1524	-476	4.80282		1524	-476	1.40304			1524	-476	0		1524	-476	0
1525	-475	4.80282		1525	-475	1.40304			1525	-475	0		1525	-475	0
1526	-474	4.80282		1526	-474	1.40304			1526	-474	0		1526	-474	0
1527	-473	4.80282		1527	-473	1.40304			1527	-473	0		1527	-473	0
1528	-472	4.80282		1528	-472	1.40304			1528	-472	0		1528	-472	0
1529	-471	4.80282		1529	-471	1.40304			1529	-471	0		1529	-471	0
1530	-470	4.80282		1530	-470	1.40304			1530	-470	0		1530	-470	0
1531	-469	4.80282		1531	-469	1.40304			1531	-469	0		1531	-469	0
1532	-468	4.80282		1532	-468	1.40304			1532	-468	0		1532	-468	0
1533	-467	4.80282		1533	-467	1.40304			1533	-467	0		1533	-467	0
1534	-466	4.80282		1534	-466	1.40304			1534	-466	0		1534	-466	0
1535	-465	4.80282		1535	-465	1.40304			1535	-465	0		1535	-465	0
1536	-464	4.80282		1536	-464	1.40304			1536	-464	0		1536	-464	0
1537	-463	4.80282		1537	-463	1.40304			1537	-463	0		1537	-463	0
1538	-462	4.80282		1538	-462	1.40304			1538	-462	0		1538	-462	0
1539	-461	4.80282		1539	-461	1.40304			1539	-461	0		1539	-461	0
1540	-460	4.80282		1540	-460	1.40304			1540	-460	0		1540	-460	0
1541	-459	4.80282		1541	-459	1.40304			1541	-459	0		1541	-459	0
1542	-458	4.80282		1542	-458	1.40304			1542	-458	0		1542	-458	0
1543	-457	4.80282		1543	-457	1.40304			1543	-457	0		1543	-457	0
1544	-456	4.80282		1544	-456	1.40304			1544	-456	0		1544	-456	0
1545	-455	4.80282		1545	-455	1.40304			1545	-455	0		1545	-455	0
1546	-454	2.98992		1546	-454	1.40304			1546	-454	0		1546	-454	0
1547	-453	2.98992		1547	-453	1.40304			1547	-453	0		1547	-453	0
1548	-452	2.98992		1548	-452	1.40304			1548	-452	0		1548	-452	0
1549	-451	2.98992		1549	-451	1.40304			1549	-451	0		1549	-451	0
1550	-450	2.98992		1550	-450	1.40304			1550	-450	0		1550	-450	0
1551	-449	4.16694		1551	-449	1.40304			1551	-449	0		1551	-449	0
1552	-448	4.75546		1552	-448	1.40304			1552	-448	0		1552	-448	0
1553	-447	4.75546		1553	-447	1.40304			1553	-447	0		1553	-447	0
1554	-446	4.16694		1554	-446	1.40304			1554	-446	0		1554	-446	0
1555	-445	4.16694		1555	-445	1.40304			1555	-445	0		1555	-445	0
1556	-444	4.16694		1556	-444	1.40304			1556	-444	0		1556	-444	0
1557	-443	3.53107		1557	-443	1.40304			1557	-443	0		1557	-443	0
1558	-442	3.53107		1558	-442	2.56276			1558	-442	0		1558	-442	0
1559	-441	3.53107		1559	-441	3.38594			1559	-441	0		1559	-441	0
1560	-440	4.16694		1560	-440	3.9658			1560	-440	0		1560	-440	0
1561	-439	4.16694		1561	-439	4.78898			1561	-439	0		1561	-439	0
1562	-438	4.16694		1562	-438	4.78898			1562	-438	0		1562	-438	0
1563	-437	4.75546		1563	-437	4.78898			1563	-437	0		1563	-437	0
1564	-436	4.75546		1564	-436	3.9658			1564	-436	0		1564	-436	0
1565	-435	6.56835		1565	-435	4.78898			1565	-435	0		1565	-435	0
1566	-434	6.56835		1566	-434	4.78898			1566	-434	0		1566	-434	0
1567	-433	7.15687		1567	-433	3.9658			1567	-433	0		1567	-433	0
1568	-432	7.74538		1568	-432	4.78898			1568	-432	0		1568	-432	0
1569	-431	7.15687		1569	-431	5.0323			1569	-431	0		1569	-431	0
1570	-430	8.38125		1570	-430	4.78898			1570	-430	0		1570	-430	0
1571	-429	7.79274		1571	-429	5.0323			1571	-429	0		1571	-429	0
1572	-428	8.96976		1572	-428	5.0323			1572	-428	0		1572	-428	0
1573	-427	8.38125		1573	-427	5.27562			1573	-427	0		1573	-427	0
1574	-426	9.55828		1574	-426	5.85548			1574	-426	0		1574	-426	0
1575	-425	9.60564		1575	-425	6.67866			1575	-425	0		1575	-425	0
1576	-424	11.9597		1576	-424	5.85548			1576	-424	0		1576	-424	0
1577	-423	11.9597		1577	-423	6.67866			1577	-423	0		1577	-423	0
1578	-422	11.9597		1578	-422	6.67866			1578	-422	0		1578	-422	0
1579	-421	11.9597		1579	-421	7.50184			1579	-421	0		1579	-421	0
1580	-420	11.9597		1580	-420	9.1482			1580	-420	0		1580	-420	0
1581	-419	11.9597		1581	-419	9.1482			1581	-419	0		1581	-419	0
1582	-418	11.9597		1582	-418	8.56834			1582	-418	0		1582	-418	0
1583	-417	11.9597		1583	-417	8.56834			1583	-417	0		1583	-417	0
1584	-416	11.9597		1584	-416	8.56834			1584	-416	0		1584	-416	0
1585	-415	12.5956		1585	-415	8.56834			1585	-415	0		1585	-415	0
1586	-414	12.5956		1586	-414	8.56834			1586	-414	0		1586	-414	0
1587	-413	12.5956		1587	-413	8.56834			1587	-413	0		1587	-413	0
1588	-412	12.5956		1588	-412	8.56834			1588	-412	0		1588	-412	0
1589	-411	12.5956		1589	-411	7.74516			1589	-411	0		1589	-411	0
1590	-410	12.5956		1590	-410	7.74516			1590	-410	0		1590	-410	0
1591	-409	12.5956		1591	-409	7.74516			1591	-409	0		1591	-409	0
1592	-408	12.0071		1592	-408	7.74516			1592	-408	0		1592	-408	0
1593	-407	12.0071		1593	-407	7.74516			1593	-407	0		1593	-407	0
1594	-406	12.0071		1594	-406	7.74516			1594	-406	0		1594	-406	0
1595	-405	12.0071		1595	-405	8.56834			1595	-405	0		1595	-405	0
1596	-404	12.0071		1596	-404	8.56834			1596	-404	0		1596	-404	0
1597	-403	11.3712		1597	-403	7.74516			1597	-403	0		1597	-403	0
1598	-402	11.3712		1598	-402	8.56834			1598	-402	0		1598	-402	0
1599	-401	10.7827		1599	-401	7.98848			1599	-401	0		1599	-401	0
1600	-400	10.7827		1600	-400	6.34212			1600	-400	0		1600	-400	0
1601	-399	10.7827		1601	-399	6.34212			1601	-399	0		1601	-399	0
1602	-398	10.7827		1602	-398	6.34212			1602	-398	0		1602	-398	0
1603	-397	9.55828		1603	-397	5.51894			1603	-397	0		1603	-397	0
1604	-396	9.55828		1604	-396	4.69576			1604	-396	0		1604	-396	0
1605	-395	8.38125		1605	-395	4.69576			1605	-395	0		1605	-395	0
1606	-394	1.8129		1606	-394	2.22622			1606	-394	0		1606	-394	0
1607	-393	1.8129		1607	-393	2.22622			1607	-393	0		1607	-393	0
1608	-392	1.8129		1608	-392	0.823179			1608	-392	0		1608	-392	0
1609	-391	1.8129		1609	-391	0.823179			1609	-391	0		1609	-391	0
1610	-390	1.8129		1610	-390	0.823179			1610	-390	0		1610	-390	0
1611	-389	1.8129		1611	-389	1.64636			1611	-389	0		1611	-389	0
1612	-388	1.8129		1612	-388	1.64636			1612	-388	0		1612	-388	0
1613	-387	1.8129		1613	-387	1.64636			1613	-387	0		1613	-387	0
1614	-386	1.8129		1614	-386	1.64636			1614	-386	0		1614	-386	0
1615	-385	1.8129		1615	-385	1.64636			1615	-385	0		1615	-385	0
1616	-384	1.8129		1616	-384	1.64636			1616	-384	0		1616	-384	0
1617	-383	1.8129		1617	-383	1.64636			1617	-383	0		1617	-383	0
1618	-382	1.8129		1618	-382	1.64636			1618	-382	0		1618	-382	0
1619	-381	1.8129		1619	-381	1.64636			1619	-381	0		1619	-381	0
1620	-380	1.8129		1620	-380	1.64636			1620	-380	0		1620	-380	0
1621	-379	1.8129		1621	-379	1.64636			1621	-379	0		1621	-379	0
1622	-378	1.8129		1622	-378	1.64636			1622	-378	0		1622	-378	0
1623	-377	1.8129		1623	-377	1.64636			1623	-377	0		1623	-377	0
1624	-376	1.8129		1624	-376	1.64636			1624	-376	0		1624	-376	0
1625	-375	1.8129		1625	-375	1.64636			1625	-375	0		1625	-375	0
1626	-374	1.8129		1626	-374	1.64636			1626	-374	0		1626	-374	0
1627	-373	1.8129		1627	-373	1.64636			1627	-373	0		1627	-373	0
1628	-372	1.8129		1628	-372	1.64636			1628	-372	0		1628	-372	0
1629	-371	1.8129		1629	-371	1.64636			1629	-371	0		1629	-371	0
1630	-370	1.8129		1630	-370	1.64636			1630	-370	0		1630	-370	0
1631	-369	1.8129		1631	-369	1.64636			1631	-369	0		1631	-369	0
1632	-368	1.8129		1632	-368	1.64636			1632	-368	0		1632	-368	0
1633	-367	1.8129		1633	-367	1.64636			1633	-367	0		1633	-367	0
1634	-366	1.8129		1634	-366	1.64636			1634	-366	0		1634	-366	0
1635	-365	1.8129		1635	-365	1.64636			1635	-365	0		1635	-365	0
1636	-364	1.8129		1636	-364	1.64636			1636	-364	0		1636	-364	0
1637	-363	1.8129		1637	-363	1.64636			1637	-363	0		1637	-363	0
1638	-362	1.8129		1638	-362	1.64636			1638	-362	0		1638	-362	0
1639	-361	1.8129		1639	-361	1.64636			1639	-361	0		1639	-361	0
1640	-360	1.8129		1640	-360	1.64636			1640	-360	0		1640	-360	0
1641	-359	1.8129		1641	-359	1.64636			1641	-359	0		1641	-359	0
1642	-358	1.8129		1642	-358	1.64636			1642	-358	0		1642	-358	0
1643	-357	1.8129		1643	-357	1.64636			1643	-357	0		1643	-357	0
1644	-356	1.8129		1644	-356	1.64636			1644	-356	0		1644	-356	0
1645	-355	1.8129		1645	-355	1.64636			1645	-355	0		1645	-355	0
1646	-354	1.8129		1646	-354	1.64636			1646	-354	0		1646	-354	0
1647	-353	1.8129		1647	-353	1.64636			1647	-353	0		1647	-353	0
1648	-352	1.8129		1648	-352	1.64636			1648	-352	0		1648	-352	0
1649	-351	1.8129		1649	-351	1.64636			1649	-351	0		1649	-351	0
1650	-350	1.8129		1650	-350	1.64636			1650	-350	0		1650	-350	0
1651	-349	1.8129		1651	-349	1.64636			1651	-349	0		1651	-349	0
1652	-348	1.8129		1652	-348	1.64636			1652	-348	0		1652	-348	0
1653	-347	1.8129		1653	-347	1.64636			1653	-347	0		1653	-347	0
1654	-346	1.8129		1654	-346	1.64636			1654	-346	0		1654	-346	0
1655	-345	1.8129		1655	-345	1.64636			1655	-345	0		1655	-345	0
1656	-344	1.8129		1656	-344	1.64636			1656	-344	0		1656	-344	0
1657	-343	1.8129		1657	-343	1.64636			1657	-343	0		1657	-343	0
1658	-342	1.8129		1658	-342	1.64636			1658	-342	0		1658	-342	0
1659	-341	1.8129		1659	-341	1.64636			1659	-341	0		1659	-341	0
1660	-340	1.8129		1660	-340	1.64636			1660	-340	0		1660	-340	0
1661	-339	1.8129		1661	-339	1.64636			1661	-339	0		1661	-339	0
1662	-338	1.8129		1662	-338	1.64636			1662	-338	0		1662	-338	0
1663	-337	1.8129		1663	-337	1.64636			1663	-337	0		1663	-337	0
1664	-336	1.8129		1664	-336	1.64636			1664	-336	0		1664	-336	0
1665	-335	1.8129		1665	-335	1.64636			1665	-335	0		1665	-335	0
1666	-334	1.8129		1666	-334	1.64636			1666	-334	0		1666	-334	0
1667	-333	1.8129		1667	-333	1.64636			1667	-333	0		1667	-333	0
1668	-332	1.8129		1668	-332	1.64636			1668	-332	0		1668	-332	0
1669	-331	1.8129		1669	-331	1.64636			1669	-331	0		1669	-331	0
1670	-330	1.8129		1670	-330	1.64636			1670	-330	0		1670	-330	0
1671	-329	1.8129		1671	-329	1.64636			1671	-329	0		1671	-329	0
1672	-328	1.8129		1672	-328	1.64636			1672	-328	0		1672	-328	0
1673	-327	1.8129		1673	-327	1.64636			1673	-327	0		1673	-327	0
1674	-326	1.8129		1674	-326	1.64636			1674	-326	0		1674	-326	0
1675	-325	1.8129		1675	-325	1.64636			1675	-325	0		1675	-325	0
1676	-324	1.8129		1676	-324	1.64636			1676	-324	0		1676	-324	0
1677	-323	1.8129		1677	-323	1.64636			1677	-323	0		1677	-323	0
1678	-322	1.8129		1678	-322	1.64636			1678	-322	0		1678	-322	0
1679	-321	1.8129		1679	-321	1.64636			1679	-321	0		1679	-321	0
1680	-320	1.8129		1680	-320	1.64636			1680	-320	0		1680	-320	0
1681	-319	1.8129		1681	-319	1.64636			1681	-319	0		1681	-319	0
1682	-318	1.8129		1682	-318	1.64636			1682	-318	0		1682	-318	0
1683	-317	1.8129		1683	-317	1.64636			1683	-317	0		1683	-317	0
1684	-316	1.8129		1684	-316	1.64636			1684	-316	0		1684	-316	0
1685	-315	1.8129		1685	-315	1.64636			1685	-315	0		1685	-315	0
1686	-314	1.8129		1686	-314	1.64636			1686	-314	0		1686	-314	0
1687	-313	1.8129		1687	-313	1.64636			1687	-313	0		1687	-313	0
1688	-312	1.8129		1688	-312	1.64636			1688	-312	0		1688	-312	0
1689	-311	1.8129		1689	-311	1.64636			1689	-311	0		1689	-311	0
1690	-310	1.8129		1690	-310	1.64636			1690	-310	0		1690	-310	0
1691	-309	1.8129		1691	-309	1.64636			1691	-309	0		1691	-309	0
1692	-308	1.8129		1692	-308	1.64636			1692	-308	0		1692	-308	0
1693	-307	1.8129		1693	-307	1.64636			1693	-307	0		1693	-307	0
1694	-306	1.8129		1694	-306	1.64636			1694	-306	0		1694	-306	0
1695	-305	1.8129		1695	-305	1.64636			1695	-305	0		1695	-305	0
1696	-304	1.8129		1696	-304	1.64636			1696	-304	0		1696	-304	0
1697	-303	1.8129		1697	-303	1.64636			1697	-303	0		1697	-303	0
1698	-302	1.8129		1698	-302	1.64636			1698	-302	0		1698	-302	0
1699	-301	1.8129		1699	-301	1.64636			1699	-301	0		1699	-301	0
1700	-300	1.8129		1700	-300	1.64636			1700	-300	0		1700	-300	0
1701	-299	1.8129		1701	-299	1.64636			1701	-299	0		1701	-299	0
1702	-298	1.8129		1702	-298	1.64636			1702	-298	0		1702	-298	0
1703	-297	1.8129		1703	-297	1.64636			1703	-297	0		1703	-297	0
1704	-296	1.8129		1704	-296	1.64636			1704	-296	0		1704	-296	0
1705	-295	1.8129		1705	-295	1.64636			1705	-295	0		1705	-295	0
1706	-294	1.8129		1706	-294	1.64636			1706	-294	0		1706	-294	0
1707	-293	1.8129		1707	-293	1.64636			1707	-293	0		1707	-293	0
1708	-292	1.8129		1708	-292	1.64636			1708	-292	0		1708	-292	0
1709	-291	1.8129		1709	-291	1.64636			1709	-291	0		1709	-291	0
1710	-290	1.8129		1710	-290	1.64636			1710	-290	0		1710	-290	0
1711	-289	1.8129		1711	-289	1.64636			1711	-289	0		1711	-289	0
1712	-288	1.8129		1712	-288	1.64636			1712	-288	0		1712	-288	0
1713	-287	1.8129		1713	-287	1.64636			1713	-287	0		1713	-287	0
1714	-286	1.8129		1714	-286	1.64636			1714	-286	0		1714	-286	0
1715	-285	1.8129		1715	-285	1.64636			1715	-285	0		1715	-285	0
1716	-284	1.8129		1716	-284	1.64636			1716	-284	0		1716	-284	0
1717	-283	1.8129		1717	-283	1.9829			1717	-283	0		1717	-283	0
1718	-282	1.8129		1718	-282	1.9829			1718	-282	0		1718	-282	0
1719	-281	1.8129		1719	-281	1.9829			1719	-281	0		1719	-281	0
1720	-280	1.8129		1720	-280	1.9829			1720	-280	0		1720	-280	0
1721	-279	1.8129		1721	-279	1.9829			1721	-279	0		1721	-279	0
1722	-278	1.8129		1722	-278	1.9829			1722	-278	0		1722	-278	0
1723	-277	1.8129		1723	-277	1.9829			1723	-277	0		1723	-277	0
1724	-276	1.8129		1724	-276	1.9829			1724	-276	0		1724	-276	0
1725	-275	1.8129		1725	-275	2.56276			1725	-275	0		1725	-275	0
1726	-274	1.8129		1726	-274	2.56276			1726	-274	0		1726	-274	0
1727	-273	1.8129		1727	-273	2.56276			1727	-273	0		1727	-273	0
1728	-272	1.8129		1728	-272	2.56276			1728	-272	0		1728	-272	0
1729	-271	1.8129		1729	-271	2.56276			1729	-271	0		1729	-271	0
1730	-270	1.8129		1730	-270	2.56276			1730	-270	0		1730	-270	0
1731	-269	1.8129		1731	-269	2.56276			1731	-269	0		1731	-269	0
1732	-268	1.8129		1732	-268	2.56276			1732	-268	0		1732	-268	0
1733	-267	1.8129		1733	-267	2.56276			1733	-267	0		1733	-267	0
1734	-266	1.8129		1734	-266	2.56276			1734	-266	0		1734	-266	0
1735	-265	1.8129		1735	-265	2.56276			1735	-265	0		1735	-265	0
1736	-264	1.8129		1736	-264	2.56276			1736	-264	0		1736	-264	0
1737	-263	1.8129		1737	-263	2.56276			1737	-263	0		1737	-263	0
1738	-262	1.8129		1738	-262	2.56276			1738	-262	0		1738	-262	0
1739	-261	1.8129		1739	-261	2.56276			1739	-261	0		1739	-261	0
1740	-260	1.8129		1740	-260	2.56276			1740	-260	0		1740	-260	0
1741	-259	1.8129		1741	-259	3.38594			1741	-259	0		1741	-259	0
1742	-258	1.8129		1742	-258	3.38594			1742	-258	0		1742	-258	0
1743	-257	1.8129		1743	-257	3.38594			1743	-257	0		1743	-257	0
1744	-256	1.8129		1744	-256	3.38594			1744	-256	0		1744	-256	0
1745	-255	1.8129		1745	-255	2.56276			1745	-255	0		1745	-255	0
1746	-254	1.8129		1746	-254	3.38594			1746	-254	0		1746	-254	0
1747	-253	1.8129		1747	-253	3.38594			1747	-253	0		1747	-253	0
1748	-252	1.8129		1748	-252	3.38594			1748	-252	0		1748	-252	0
1749	-251	1.8129		1749	-251	3.38594			1749	-251	0		1749	-251	0
1750	-250	1.8129		1750	-250	3.38594			1750	-250	0		1750	-250	0
1751	-249	1.8129		1751	-249	4.20912			1751	-249	0		1751	-249	0
1752	-248	1.8129		1752	-248	4.20912			1752	-248	0		1752	-248	0
1753	-247	1.8129		1753	-247	4.78898			1753	-247	0		1753	-247	0
1754	-246	1.8129		1754	-246	4.78898			1754	-246	0		1754	-246	0
1755	-245	1.8129		1755	-245	4.78898			1755	-245	0		1755	-245	0
1756	-244	1.8129		1756	-244	4.78898			1756	-244	0		1756	-244	0
1757	-243	1.8129		1757	-243	4.78898			1757	-243	0		1757	-243	0
1758	-242	1.8129		1758	-242	4.78898			1758	-242	0		1758	-242	0
1759	-241	1.8129		1759	-241	4.78898			1759	-241	0		1759	-241	0
1760	-240	1.8129		1760	-240	2.80608			1760	-240	0		1760	-240	0
1761	-239	1.8129		1761	-239	2.80608			1761	-239	0		1761	-239	0
1762	-238	1.8129		1762	-238	2.80608			1762	-238	0		1762	-238	0
1763	-237	1.8129		1763	-237	2.80608			1763	-237	0		1763	-237	0
1764	-236	1.8129		1764	-236	2.22622			1764	-236	0		1764	-236	0
1765	-235	3.08465		1765	-235	3.38594			1765	-235	0		1765	-235	0
1766	-234	3.08465		1766	-234	3.38594			1766	-234	0		1766	-234	0
1767	-233	3.08465		1767	-233	3.38594			1767	-233	0		1767	-233	0
1768	-232	3.08465		1768	-232	3.38594			1768	-232	0		1768	-232	0
1769	-231	3.72052		1769	-231	3.38594			1769	-231	0		1769	-231	0
1770	-230	3.72052		1770	-230	3.9658			1770	-230	0		1770	-230	0
1771	-229	3.72052		1771	-229	6.19202			1771	-229	0		1771	-229	0
1772	-228	4.30904		1772	-228	6.77188			1772	-228	0		1772	-228	0
1773	-227	4.89755		1773	-227	8.17492			1773	-227	0		1773	-227	0
1774	-226	5.53342		1774	-226	8.75478			1774	-226	0		1774	-226	0
1775	-225	6.80517		1775	-225	9.57796			1775	-225	0		1775	-225	0
1776	-224	10.5257		1776	-224	11.3175			1776	-224	0		1776	-224	0
1777	-223	22.7222		1777	-223	11.3175			1777	-223	0		1777	-223	0
1778	-222	20.8619		1778	-222	11.0742			1778	-222	0		1778	-222	0
1779	-221	23.3581		1779	-221	11.0742			1779	-221	0		1779	-221	0
1780	-220	22.7222		1780	-220	11.0742			1780	-220	0		1780	-220	0
1781	-219	23.9466		1781	-219	11.6541			1781	-219	0		1781	-219	0
1782	-218	23.9466		1782	-218	12.4773			1782	-218	0		1782	-218	0
1783	-217	24.5825		1783	-217	14.1236			1783	-217	0		1783	-217	0
1784	-216	28.1609		1784	-216	14.1236			1784	-216	0		1784	-216	0
1785	-215	31.1508		1785	-215	14.9468			1785	-215	0		1785	-215	0
1786	-214	31.1508		1786	-214	15.5267			1786	-214	0		1786	-214	0
1787	-213	32.9637		1787	-213	15.5267			1787	-213	0		1787	-213	0
1788	-212	34.1407		1788	-212	15.5267			1788	-212	0		1788	-212	0
1789	-211	42.7115		1789	-211	15.5267			1789	-211	0		1789	-211	0
1790	-210	51.2822		1790	-210	16.3498			1790	-210	0		1790	-210	0
1791	-209	55.4017		1791	-209	16.3498			1791	-209	0		1791	-209	0
1792	-208	60.1098		1792	-208	17.173			1792	-208	0		1792	-208	0
1793	-207	67.9026		1793	-207	17.173			1793	-207	0		1793	-207	0
1794	-206	68.5385		1794	-206	17.173			1794	-206	0		1794	-206	0
1795	-205	75.2015		1795	-205	19.7358			1795	-205	0		1795	-205	0
1796	-204	76.4259		1796	-204	18.5761			1796	-204	0		1796	-204	0
1797	-203	79.4158		1797	-203	19.1559			1797	-203	0		1797	-203	0
1798	-202	83.5828		1798	-202	19.1559			1798	-202	0		1798	-202	0
1799	-201	85.9842		1799	-201	16.2566			1799	-201	0		1799	-201	0
1800	-200	87.256		1800	-200	15.6768			1800	-200	0		1800	-200	0
1801	-199	88.433		1801	-199	15.6768			1801	-199	0		1801	-199	0
1802	-198	89.0688		1802	-198	15.4334			1802	-198	0		1802	-198	0
1803	-197	92.5999		1803	-197	16.5932			1803	-197	0		1803	-197	0
1804	-196	93.2358		1804	-196	19.7358			1804	-196	0		1804	-196	0
1805	-195	95.5898		1805	-195	21.1388			1805	-195	0		1805	-195	0
1806	-194	96.2257		1806	-194	21.4754			1806	-194	0		1806	-194	0
1807	-193	97.5448		1807	-193	22.0552			1807	-193	0		1807	-193	0
1808	-192	104.161		1808	-192	22.6351			1808	-192	0		1808	-192	0
1809	-191	104.702		1809	-191	22.6351			1809	-191	0		1809	-191	0
1810	-190	101.712		1810	-190	22.0552			1810	-190	0		1810	-190	0
1811	-189	107.198		1811	-189	23.4583			1811	-189	0		1811	-189	0
1812	-188	109.599		1812	-188	22.8784			1812	-188	0		1812	-188	0
1813	-187	113.32		1813	-187	23.4583			1813	-187	0		1813	-187	0
1814	-186	112.637		1814	-186	24.618			1814	-186	0		1814	-186	0
1815	-185	113.367		1815	-185	28.0039			1815	-185	0		1815	-185	0
1816	-184	112.779		1816	-184	26.8442			1816	-184	0		1816	-184	0
1817	-183	112.19		1817	-183	31.1465			1817	-183	0		1817	-183	0
1818	-182	109.883		1818	-182	27.7606			1818	-182	0		1818	-182	0
1819	-181	111.602		1819	-181	30.3234			1819	-181	0		1819	-181	0
1820	-180	111.013		1820	-180	30.3234			1820	-180	0		1820	-180	0
1821	-179	112.19		1821	-179	33.3728			1821	-179	0		1821	-179	0
1822	-178	109.295		1822	-178	33.3728			1822	-178	0		1822	-178	0
1823	-177	106.258		1823	-177	33.7093			1823	-177	0		1823	-177	0
1824	-176	105.081		1824	-176	31.4831			1824	-176	0		1824	-176	0
1825	-175	97.1931		1825	-175	26.2075			1825	-175	0		1825	-175	0
1826	-174	78.6651		1826	-174	25.0477			1826	-174	0		1826	-174	0
1827	-173	58.3443		1827	-173	26.7873			1827	-173	0		1827	-173	0
1828	-172	52.8582		1828	-172	26.2075			1828	-172	0		1828	-172	0
1829	-171	49.1377		1829	-171	27.6105			1829	-171	0		1829	-171	0
1830	-170	46.6889		1830	-170	27.3672			1830	-170	0		1830	-170	0
1831	-169	47.9133		1831	-169	35.5421			1831	-169	0		1831	-169	0
1832	-168	47.9607		1832	-168	37.1885			1832	-168	0		1832	-168	0
1833	-167	45.5593		1833	-167	39.7512			1833	-167	0		1833	-167	0
1834	-166	65.995		1834	-166	37.4318			1834	-166	0		1834	-166	0
1835	-165	65.995		1835	-165	38.0116			1835	-165	0		1835	-165	0
1836	-164	64.2294		1836	-164	38.8348			1836	-164	12.6429		1836	-164	0
1837	-163	64.2294		1837	-163	39.658			1837	-163	12.0544		1837	-163	0
1838	-162	63.6409		1838	-162	37.9184			1838	-162	12.0544		1838	-162	0
1839	-161	62.3692		1839	-161	39.3215			1839	-161	12.0544		1839	-161	0
1840	-160	64.1821		1840	-160	38.7416			1840	-160	12.0544		1840	-160	0
1841	-159	62.4639		1841	-159	38.4983			1841	-159	12.0544		1841	-159	0
1842	-158	62.5112		1842	-158	40.4812			1842	-158	12.0544		1842	-158	0
1843	-157	57.5663		1843	-157	40.7245			1843	-157	12.0544		1843	-157	0
1844	-156	99.2902		1844	-156	59.5439			1844	-156	11.4185		1844	-156	0
1845	-155	102.517		1845	-155	63.753			1845	-155	10.1942		1845	-155	0
1846	-154	105.744		1846	-154	65.9792			1846	-154	9.01713		1846	-154	0
1847	-153	106.332		1847	-153	64.8195			1847	-153	9.01713		1847	-153	0
1848	-152	104.472		1848	-152	67.7188			1848	-152	9.01713		1848	-152	0
1849	-151	105.203		1849	-151	58.964			1849	-151	7.79274		1849	-151	0
1850	-150	103.978		1850	-150	62.0134			1850	-150	7.20423		1850	-150	0
1851	-149	106.522		1851	-149	65.156			1851	-149	7.20423		1851	-149	0
1852	-148	108.97		1852	-148	71.9279			1852	-148	6.61572		1852	-148	0
1853	-147	111.419		1853	-147	74.734			1853	-147	6.02721		1853	-147	0
1854	-146	115.14		1854	-146	74.734			1854	-146	6.07457		1854	-146	4.20912
1855	-145	113.963		1855	-145	74.3975			1855	-145	5.48606		1855	-145	5.36884
1856	-144	117.636		1856	-144	73.8176			1856	-144	4.89755		1856	-144	5.36884
1857	-143	122.486		1857	-143	77.7834			1857	-143	4.94491		1857	-143	5.36884
1858	-142	129.69		1858	-142	83.4888			1858	-142	5.58079		1858	-142	5.36884
1859	-141	161.876		1859	-141	86.2016			1859	-141	6.80517		1859	-141	5.36884
1860	-140	166.584		1860	-140	90.504			1860	-140	7.44105		1860	-140	5.9487
1861	-139	172.659		1861	-139	92.0571			1861	-139	8.7128		1861	-139	5.9487
1862	-138	179.816		1862	-138	91.7206			1862	-138	9.34868		1862	-138	6.52856
1863	-137	178.496		1863	-137	90.4108			1863	-137	11.7975		1863	-137	8.51146
1864	-136	183.299		1864	-136	89.5876			1864	-136	14.1989		1864	-136	9.9145
1865	-135	185.653		1865	-135	94.3766			1865	-135	17.872		1865	-135	11.0742
1866	-134	170.42		1866	-134	94.6199			1866	-134	17.872		1866	-134	11.6541
1867	-133	157.303		1867	-133	86.8747			1867	-133	18.5079		1867	-133	10.8309
1868	-132	161.659		1868	-132	89.8309			1868	-132	18.5079		1868	-132	10.251
1869	-131	161.023		1869	-131	86.5951			1869	-131	18.5079		1869	-131	9.67118
1870	-130	163.966		1870	-130	91.4773			1870	-130	18.5079		1870	-130	9.67118
1871	-129	172.395		1871	-129	120.755			1871	-129	18.5553		1871	-129	9.67118
1872	-128	178.611		1872	-128	124.047			1872	-128	18.5553		1872	-128	9.67118
1873	-127	178.564		1873	-127	122.738			1873	-127	18.5553		1873	-127	9.67118
1874	-126	179.152		1874	-126	125.45			1874	-126	19.1911		1874	-126	10.8309
1875	-125	177.881		1875	-125	126.274			1875	-125	18.5553		1875	-125	12.2339
1876	-124	178.469		1876	-124	127.433			1876	-124	18.5553		1876	-124	12.8138
1877	-123	179.01		1877	-123	126.853			1877	-123	17.3309		1877	-123	12.5705
1878	-122	184.307		1878	-122	126.853			1878	-122	17.3309		1878	-122	12.5705
1879	-121	183.718		1879	-121	126.703			1879	-121	17.3782		1879	-121	12.5705
1880	-120	144.423		1880	-120	125.88			1880	-120	17.3782		1880	-120	13.1503
1881	-119	142.022		1881	-119	140.061			1881	-119	16.1539		1881	-119	13.1503
1882	-118	141.927		1882	-118	137.498			1882	-118	16.1539		1882	-118	13.1503
1883	-117	140.608		1883	-117	134.935			1883	-117	15.518		1883	-117	13.1503
1884	-116	148.543		1884	-116	134.112			1884	-116	15.518		1884	-116	12.5705
1885	-115	147.907		1885	-115	136.582			1885	-115	15.518		1885	-115	12.5705
1886	-114	147.907		1886	-114	135.758			1886	-114	15.518		1886	-114	13.3937
1887	-113	147.366		1887	-113	132.952			1887	-113	14.8821		1887	-113	13.3937
1888	-112	147.413		1888	-112	134.355			1888	-112	14.2462		1888	-112	12.2339
1889	-111	143.104		1889	-111	130.969			1889	-111	13.0218		1889	-111	12.2339
1890	-110	144.87		1890	-110	111.213			1890	-110	10.5731		1890	-110	12.2339
1891	-109	138.112		1891	-109	117.069			1891	-109	8.07693		1891	-109	10.4944
1892	-108	136.394		1892	-108	115.086			1892	-108	7.48841		1892	-108	10.4944
1893	-107	138.159		1893	-107	113.926			1893	-107	6.1693		1893	-107	10.4944
1894	-106	131.449		1894	-106	110.54			1894	-106	5.53342		1894	-106	9.09132
1895	-105	129.047		1895	-105	107.641			1895	-105	4.94491		1895	-105	7.9316
1896	-104	123.656		1896	-104	102.028			1896	-104	3.72052		1896	-104	6.77188
1897	-103	122.337		1897	-103	79.2433			1897	-103	3.13201		1897	-103	6.19202
1898	-102	136.441		1898	-102	98.5857			1898	-102	2.49614		1898	-102	3.9658
1899	-101	145.79		1899	-101	97.2759			1899	-101	2.49614		1899	-101	3.9658
1900	-100	140.703		1900	-100	94.563			1900	-100	2.49614		1900	-100	2.56276
1901	-99	136.63		1901	-99	101.765			1901	-99	2.49614		1901	-99	2.56276
1902	-98	137.808		1902	-98	102.008			1902	-98	2.49614		1902	-98	2.56276
1903	-97	127.12		1903	-97	112.166			1903	-97	2.49614		1903	-97	2.56276
1904	-96	132.653		1904	-96	110.276			1904	-96	2.49614		1904	-96	2.56276
1905	-95	141.271		1905	-95	113.662			1905	-95	2.49614		1905	-95	2.56276
1906	-94	152.196		1906	-94	115.645			1906	-94	2.49614		1906	-94	2.56276
1907	-93	157.188		1907	-93	121.594			1907	-93	2.49614		1907	-93	2.56276
1908	-92	160.909		1908	-92	123.483			1908	-92	2.49614		1908	-92	2.56276
1909	-91	158.555		1909	-91	124.886			1909	-91	2.49614		1909	-91	2.56276
1910	-90	165.806		1910	-90	149.991			1910	-90	2.49614		1910	-90	2.56276
1911	-89	162.769		1911	-89	153.284			1911	-89	2.49614		1911	-89	2.56276
1912	-88	171.103		1912	-88	153.284			1912	-88	2.49614		1912	-88	2.56276
1913	-87	171.008		1913	-87	148.402			1913	-87	2.49614		1913	-87	2.56276
1914	-86	175.222		1914	-86	149.898			1914	-86	2.49614		1914	-86	2.56276
1915	-85	176.447		1915	-85	147.672			1915	-85	2.49614		1915	-85	2.56276
1916	-84	186.546		1916	-84	147.428			1916	-84	2.49614		1916	-84	2.56276
1917	-83	180.167		1917	-83	149.504			1917	-83	2.49614		1917	-83	2.56276
1918	-82	181.155		1918	-82	147.858			1918	-82	2.49614		1918	-82	2.56276
1919	-81	177.576		1919	-81	151.917			1919	-81	2.49614		1919	-81	2.56276
1920	-80	170.961		1920	-80	151.337			1920	-80	2.49614		1920	-80	2.56276
1921	-79	165.38		1921	-79	151.58			1921	-79	2.49614		1921	-79	2.56276
1922	-78	164.108		1922	-78	148.195			1922	-78	2.49614		1922	-78	2.56276
1923	-77	168.228		1923	-77	135.81			1923	-77	2.49614		1923	-77	2.56276
1924	-76	162.836		1924	-76	145.202			1924	-76	2.49614		1924	-76	2.56276
1925	-75	171.948		1925	-75	139.497			1925	-75	2.49614		1925	-75	2.56276
1926	-74	175.669		1926	-74	133.734			1926	-74	2.49614		1926	-74	2.56276
1927	-73	177.434		1927	-73	130.105			1927	-73	2.49614		1927	-73	2.56276
1928	-72	182.968		1928	-72	146.548			1928	-72	2.49614		1928	-72	2.56276
1929	-71	181.838		1929	-71	142.582			1929	-71	2.49614		1929	-71	2.56276
1930	-70	168.465		1930	-70	140.936			1930	-70	2.49614		1930	-70	2.56276
1931	-69	171.407		1931	-69	151.001			1931	-69	2.49614		1931	-69	2.56276
1932	-68	173.315		1932	-68	154.966			1932	-68	2.49614		1932	-68	2.56276
1933	-67	179.883		1933	-67	161.008			1933	-67	2.49614		1933	-67	2.56276
1934	-66	186.736		1934	-66	161.832			1934	-66	2.49614		1934	-66	2.56276
1935	-65	166.936		1935	-65	152.984			1935	-65	2.49614		1935	-65	2.56276
1936	-64	165.617		1936	-64	156.52			1936	-64	2.49614		1936	-64	2.56276
1937	-63	166.205		1937	-63	153.47			1937	-63	2.49614		1937	-63	2.56276
1938	-62	167.477		1938	-62	157.343			1938	-62	2.49614		1938	-62	2.56276
1939	-61	168.559		1939	-61	159.569			1939	-61	2.49614		1939	-61	2.56276
1940	-60	174.539		1940	-60	164.845			1940	-60	2.49614		1940	-60	2.56276
1941	-59	176.352		1941	-59	163.105			1941	-59	2.49614		1941	-59	2.56276
1942	-58	178.99		1942	-58	166.004			1942	-58	2.49614		1942	-58	2.56276
1943	-57	191.376		1943	-57	173.263			1943	-57	2.49614		1943	-57	5.61216
1944	-56	210.046		1944	-56	196.291			1944	-56	2.49614		1944	-56	5.61216
1945	-55	207.009		1945	-55	196.628			1945	-55	2.49614		1945	-55	5.85548
1946	-54	207.009		1946	-54	203.063			1946	-54	2.49614		1946	-54	6.43534
1947	-53	216.946		1947	-53	210.808			1947	-53	2.49614		1947	-53	6.43534
1948	-52	220.667		1948	-52	217.337			1948	-52	2.49614		1948	-52	7.0152
1949	-51	223.021		1949	-51	224.352			1949	-51	2.49614		1949	-51	7.59506
1950	-50	223.657		1950	-50	231.031			1950	-50	2.49614		1950	-50	7.59506
1951	-49	226.647		1951	-49	257.782			1951	-49	2.49614		1951	-49	7.59506
1952	-48	235.075		1952	-48	258.268			1952	-48	2.49614		1952	-48	7.59506
1953	-47	218.218		1953	-47	243.788			1953	-47	2.49614		1953	-47	9.33464
1954	-46	222.973		1954	-46	247.904			1954	-46	2.49614		1954	-46	9.33464
1955	-45	233.851		1955	-45	255.069			1955	-45	2.49614		1955	-45	10.7377
1956	-44	246.379		1956	-44	253.966			1956	-44	2.49614		1956	-44	10.7377
1957	-43	247.015		1957	-43	258.755			1957	-43	2.49614		1957	-43	12.384
1958	-42	258.528		1958	-42	266.837			1958	-42	3.6258		1958	-42	12.9639
1959	-41	268.323		1959	-41	275.405			1959	-41	3.6258		1959	-41	15.4334
1960	-40	279.038		1960	-40	281.934			1960	-40	3.6258		1960	-40	14.6103
1961	-39	288.975		1961	-39	296.544			1961	-39	3.6258		1961	-39	14.0304
1962	-38	293.873		1962	-38	308.441			1962	-38	3.6258		1962	-38	14.0304
1963	-37	303.337		1963	-37	309.208			1963	-37	3.6258		1963	-37	12.384
1964	-36	299.663		1964	-36	319.122			1964	-36	3.6258		1964	-36	12.9639
1965	-35	304.067		1965	-35	320.339			1965	-35	3.6258		1965	-35	12.9639
1966	-34	303.431		1966	-34	326.531			1966	-34	3.6258		1966	-34	15.5267
1967	-33	336.043		1967	-33	339.681			1967	-33	5.39133		1967	-33	18.0894
1968	-32	344.567		1968	-32	387.271			1968	-32	5.39133		1968	-32	18.6693
1969	-31	350.831		1969	-31	394.809			1969	-31	5.39133		1969	-31	18.6693
1970	-30	361.262		1970	-30	398.345			1970	-30	5.39133		1970	-30	20.6522
1971	-29	362.581		1971	-29	400.814			1971	-29	5.39133		1971	-29	19.829
1972	-28	364.793		1972	-28	407.006			1972	-28	5.39133		1972	-28	19.829
1973	-27	372.538		1973	-27	409.569			1973	-27	5.39133		1973	-27	19.829
1974	-26	374.446		1974	-26	397.708			1974	-26	5.97984		1974	-26	19.829
1975	-25	372.538		1975	-25	390.3			1975	-25	5.39133		1975	-25	19.2491
1976	-24	396.153		1976	-24	393.199			1976	-24	5.97984		1976	-24	19.2491
1977	-23	388.949		1977	-23	391.552			1977	-23	6.61572		1977	-23	18.426
1978	-22	379.553		1978	-22	428.705			1978	-22	6.61572		1978	-22	17.2662
1979	-21	410.798		1979	-21	422.999			1979	-21	6.61572		1979	-21	17.2662
1980	-20	409.08		1980	-20	432.334			1980	-20	6.61572		1980	-20	18.0894
1981	-19	416.826		1981	-19	437.216			1981	-19	6.61572		1981	-19	18.0894
1982	-18	422.359		1982	-18	450.273			1982	-18	7.20423		1982	-18	17.2662
1983	-17	401.335		1983	-17	441.705			1983	-17	7.20423		1983	-17	16.6864
1984	-16	393.799		1984	-16	423.015			1984	-16	7.20423		1984	-16	17.2662
1985	-15	398.46		1985	-15	450.832			1985	-15	7.20423		1985	-15	16.4431
1986	-14	395.774		1986	-14	443.967			1986	-14	7.20423		1986	-14	15.6199
1987	-13	389.7		1987	-13	446.924			1987	-13	7.20423		1987	-13	14.4602
1988	-12	383.483		1988	-12	462.057			1988	-12	7.20423		1988	-12	14.4602
1989	-11	408.322		1989	-11	473.861			1989	-11	6.61572		1989	-11	13.637
1990	-10	411.996		1990	-10	477.49			1990	-10	6.61572		1990	-10	13.637
1991	-9	470.55		1991	-9	471.598			1991	-9	6.61572		1991	-9	12.8138
1992	-8	482.205		1992	-8	473.918			1992	-8	7.20423		1992	-8	12.8138
1993	-7	488.915		1993	-7	474.161			1993	-7	7.79274		1993	-7	13.637
1994	-6	499.299		1994	-6	461.384			1994	-6	8.42862		1994	-6	10.1578
1995	-5	496.498		1995	-5	459.251			1995	-5	7.88747		1995	-5	11.8974
1996	-4	497.581		1996	-4	456.108			1996	-4	12.6903		1996	-4	10.1578
[truncated: 4,003 more rows]
