# Supplementary material for: Eukaryotic initiation factor EIF-3.G augments mRNA translation efficiency to regulate neuronal activity
Source: eLife. 2021 Jul 29;10:e68336. doi: 10.7554/eLife.68336 (PMC8354637; doi:10.7554/eLife.68336)
Supplement: Figure 4—source data 4. — Length of 5’UTRs in mRNAs expressed in the ACh-MN transcriptome and EIF-3.G targets. [file elife-68336-fig4-data4.xlsx]

## Sheet: Figure 4E
5'UTR length (nts)
ACh-MN (n= 4,573)	eif3G_targets (n=179)
268	28
289	139
305	27
30	30
151	15
436	173
67	48
107	425
176	26
22	37
82	48
97	37
58	41
127	54
139	10
27	84
148	21
65	64
25	172
158	39
67	93
143	502
27	10
56	17
51	45
16	13
68	84
12	158
40	294
33	136
33	36
122	479
63	93
11	270
14	69
15	71
16	126
427	74
27	760
38	213
98	1352
169	354
98	325
12	16
13	50
163	21
62	60
185	192
116	26
56	96
156	16
14	103
143	30
261	458
81	1203
583	145
21	229
110	188
105	12
21	193
26	22
163	94
10	35
200	92
11	10
117	252
37	252
117	16
33	77
296	10
181	529
349	483
428	44
29	24
86	41
111	242
10	80
13	140
119	121
19	257
56	139
83	158
36	34
122	369
103	91
209	48
397	15
35	22
28	18
26	152
12	418
31	18
37	24
28	405
26	72
91	115
353	27
229	130
80	374
78	482
12	38
45	294
13	306
20	26
1319	15
124	1081
21	448
121	37
83	62
158	76
101	158
149	170
382	44
363	511
321	60
371	35
97	388
12	411
20	212
81	16
40	191
379	299
52	215
33	323
72	934
39	575
40	214
14	226
405	58
271	12
20	87
17	42
57	118
45	118
145	241
130	76
95	70
405	215
137	23
48	19
12	214
127	274
30	519
34	281
249	187
159	16
586	177
30	115
29	371
18	90
81	32
32	413
61	84
66	451
79	92
17	34
71	11
102	339
104	154
354	249
208	11
25	302
15	202
226	52
81	51
39	103
33	142
16	173
23	469
110	63
60	1169
34	336
53	11
56	22
27	144
15	107
23	31
17	44
342	40
145
303
115
120
41
36
107
332
180
14
225
76
68
145
12
199
16
27
13
346
56
347
165
81
47
12
294
71
48
453
554
28
197
30
157
62
187
208
42
38
69
122
137
103
144
19
83
399
117
110
40
192
15
18
74
104
369
282
37
104
147
22
14
13
45
22
474
103
404
90
24
65
70
39
255
19
16
32
14
503
325
28
139
152
69
34
75
108
321
142
37
412
495
56
33
18
189
269
30
152
146
120
19
20
302
242
109
320
19
27
269
109
111
18
111
60
177
123
34
42
244
286
13
24
68
260
132
52
193
63
48
85
651
139
16
10
718
25
15
98
26
98
57
30
22
11
148
20
66
91
21
48
30
12
71
93
61
16
206
24
34
74
30
274
22
84
315
537
10
13
36
11
95
12
11
15
286
253
119
208
110
13
227
247
206
28
87
26
207
19
55
29
23
201
13
38
55
63
50
22
23
22
118
16
15
165
415
371
15
252
215
17
488
640
100
19
469
167
72
11
371
63
39
14
102
166
21
32
149
143
67
133
93
67
66
17
530
27
87
199
106
111
19
47
522
15
61
23
97
300
48
14
11
62
376
11
11
51
54
10
10
55
26
21
19
90
126
4011
93
44
92
26
38
126
235
80
182
208
615
125
14
115
31
37
380
18
173
105
151
421
35
11
32
47
53
135
323
237
22
60
13
63
97
365
96
36
64
10
130
15
13
10
113
54
30
338
119
182
203
21
321
52
17
26
75
30
18
132
66
71
507
102
34
20
94
21
340
43
36
34
84
13
32
272
12
18
145
19
327
157
26
245
46
34
403
2145
33
227
76
165
247
129
114
80
236
192
83
470
194
238
146
14
10
75
33
33
196
35
20
73
17
55
12
11
109
15
1519
18
30
25
39
127
15
298
65
155
12
89
81
114
18
192
32
20
91
170
14
96
34
583
26
98
178
233
103
74
68
52
386
110
19
127
114
45
10
96
105
1658
78
32
349
48
87
10
18
137
97
12
95
24
79
27
96
37
16
24
155
239
38
201
225
99
21
125
10
271
21
18
14
10
12
92
195
10180
80
133
23
79
26
587
57
154
337
20
488
117
154
195
100
108
14
189
335
144
513
38
22
494
20
17
102
353
27
82
225
274
108
477
129
4806
172
17
17
66
64
13
154
97
3232
19
14
12
129
103
36
36
19
41
70
36
23
14
22
29
98
30
56
166
37
519
20
11
24
13
115
16
495
105
146
114
87
53
84
323
50
83
56
164
374
112
95
478
241
78
38
39
10
199
64
54
273
55
33
71
17
18
44
16
307
25
50
75
149
10
24
33
15
15
34
26
63
211
170
182
36
55
37
366
18
14
117
135
127
112
15
92
13
293
414
13
189
52
219
665
102
59
23
43
420
240
38
664
400
27
51
85
129
43
30
21
74
25
13
227
91
30
231
210
93
44
58
582
34
139
292
19
14
77
59
409
1037
24
14
90
49
13
42
143
76
12
13
16
18
106
220
346
42
61
163
124
348
14
254
93
59
684
123
145
107
194
487
21
580
152
18
67
69
28
83
36
43
156
99
41
15
42
212
28
130
441
106
17
152
24
115
73
55
12
957
23
38
38
139
2201
18
671
50
305
61
51
30
19
273
266
14
76
148
91
121
37
29
56
55
139
24
48
43
496
241
150
52
14
31
97
18
188
17
38
48
214
465
79
931
99
74
157
15
56
531
208
308
14
398
35
332
73
15
11
123
1872
90
41
10
15
45
56
158
105
16
10
136
39
84
24
11
571
12
122
101
22
126
56
21
59
106
20
148
15
17
68
56
20
38
69
11
31
43
184
13
12
236
45
121
181
11
65
262
16
71
22
56
326
36
10
1428
11
54
92
194
76
122
62
110
23
19
56
50
276
104
106
64
191
143
120
762
10
16
45
29
60
16
37
147
73
64
247
223
389
326
44
18
257
223
18
231
11
245
72
80
513
19
16
368
43
84
12
273
34
32
18
374
35
28
18
28
114
57
21
151
109
48
115
532
51
16
561
159
184
78
155
266
38
258
159
85
269
13
115
176
68
65
162
336
139
14
44
503
16
274
12
960
116
179
126
103
19
33
162
48
83
230
60
130
17
27
31
103
85
81
48
15
130
33
83
32
366
262
220
51
189
77
61
298
251
19
27
60
76
23
11
165
169
27
57
16
30
129
338
19
118
113
479
42
12
186
105
459
93
146
63
54
20
454
118
90
143
83
528
17
16
44
106
11
126
26
50
106
34
16
124
210
158
203
163
586
181
474
30
53
403
17
48
36
528
24
38
39
21
118
270
21
271
430
122
234
330
464
92
62
30
176
11
26
13
118
18
202
145
86
115
61
88
12
59
378
562
142
21
13
630
47
15
127
135
34
103
1255
50
75
35
188
49
83
79
59
228
34
61
123
558
80
80
191
188
68
116
18
12
218
81
13
353
124
17
27
135
33
311
86
172
17
68
14
483
34
301
358
106
11
363
708
14
88
143
53
241
111
58
102
12
208
202
19
66
11
123
49
41
70
125
118
458
77
446
69
120
233
590
75
226
477
380
68
418
13
34
250
31
53
482
58
95
277
87
126
86
241
164
1005
33
21
12
11
75
29
78
187
25
287
51
26
16
2102
12
165
24
127
14
15
21
382
93
336
71
13
68
288
89
71
27
17
135
38
122
56
26
175
315
26
22
295
97
336
105
30
79
51
22
111
112
477
177
279
41
23
37
223
34
95
63
14
101
215
42
121
29
289
31
26
348
33
155
84
44
67
59
56
57
170
170
27
168
88
190
245
213
11
144
227
61
34
36
17
151
55
26
34
25
17
53
113
13
83
83
37
28
36
18
124
92
15
10
10
369
191
70
440
294
47
212
35
145
20
123
70
237
560
10
87
106
10
34
32
17
97
15
48
58
72
19
505
441
34
184
29
16
28
13
411
108
69
98
161
244
68
369
24
14
10
83
57
56
10
17
61
230
421
20
294
92
13
16
269
124
40
101
93
19
73
265
99
84
22
18
36
232
114
18
403
240
10
826
37
118
250
17
59
283
64
64
156
170
11
21
28
119
183
22
37
95
134
22
15
40
44
30
12
69
36
411
60
103
11
71
674
89
222
106
33
42
63
89
55
23
21
90
149
20
152
32
15
268
96
102
221
13
430
126
68
371
30
225
46
170
528
40
37
451
22
83
17
45
13
29
29
42
36
15
110
175
143
374
41
25
11
107
81
214
39
242
83
140
136
47
27
137
437
413
249
15
168
183
21
391
16
68
122
166
13
70
269
353
35
23
72
283
187
10
299
433
88
22
83
277
53
181
119
164
32
34
89
574
249
153
25
73
284
18
17
395
680
107
32
1203
17
437
82
17
15
23
85
13
10
43
62
16
326
82
104
92
86
157
25
21
102
78
16
273
20
39
38
77
64
35
31
10
35
88
16
43
150
103
84
321
22
31
266
225
225
39
12
64
142
14
15
532
30
19
184
55
565
13
15
66
107
60
48
16
19
12
372
32
32
25
130
1069
33
52
571
50
21
107
15
52
1550
11
35
110
28
240
27
110
27
32
28
61
39
16
43
172
22
226
70
10
43
215
17
171
47
73
725
14
104
68
21
200
21
168
145
90
71
18
161
338
16
34
251
37
75
11
14
16
11
1656
18
85
122
153
401
245
101
38
207
29
192
114
108
96
12
132
106
314
15
191
112
112
53
18
112
400
32
86
109
85
35
44
10
10
58
28
33
294
11
75
277
64
511
99
352
257
146
37
129
62
540
216
181
126
17
96
479
146
71
242
71
127
20
1300
1758
28
585
56
16
13
404
51
252
39
19
23
93
102
12
21
12
35
361
10
158
13
296
96
123
38
143
39
45
19
39
107
15
62
833
334
34
315
132
27
58
134
36
44
26
127
131
29
293
156
40
183
24
48
144
169
14
69
468
52
85
229
92
40
45
71
156
85
568
103
53
30
87
552
87
46
90
10
63
31
94
34
38
176
54
54
15
32
96
45
38
10
71
38
89
133
62
50
20
31
366
18
82
13
12
14
375
129
13
10
136
1169
139
285
212
94
37
18
398
155
87
77
417
151
17
17
60
83
391
20
69
595
334
79
27
285
233
10
423
11
5316
131
94
30
60
266
225
76
255
88
33
[truncated: 2,575 more rows]
