# Supplementary material for: Eukaryotic initiation factor EIF-3.G augments mRNA translation efficiency to regulate neuronal activity
Source: eLife. 2021 Jul 29;10:e68336. doi: 10.7554/eLife.68336 (PMC8354637; doi:10.7554/eLife.68336)
Supplement: Figure 4—source data 5. — Percent GC of 5’UTRs in mRNAs expressed in the ACh-MN transcriptome and EIF-3.G targets. [file elife-68336-fig4-data5.xlsx]

## Sheet: Figure 4F
5'UTR GC (%)
ACh-MN (n= 4,573)	eif3G_targets (n=179)
0.608209	0.357143
0.435986	0.374101
0.416393	0.407407
0.6	0.466667
0.331126	0.533333
0.431193	0.300578
0.522388	0.4375
0.383178	0.44
0.238636	0.307692
0.409091	0.351351
0.353658	0.541667
0.298969	0.594595
0.362069	0.219512
0.401575	0.388889
0.381295	0.5
0.296296	0.52381
0.364865	0.380952
0.169231	0.34375
0.32	0.465116
0.455696	0.384615
0.343284	0.55914
0.384615	0.521912
0.148148	0.1
0.321429	0.352941
0.509804	0.511111
0.375	0.230769
0.264706	0.547619
0.416667	0.468354
0.2	0.394558
0.212121	0.514706
0.212121	0.472222
0.295082	0.40501
0.269841	0.236559
0.545455	0.507407
0.5	0.463768
0.466667	0.309859
0.5	0.404762
0.323185	0.351351
0.407407	0.392105
0.31579	0.478873
0.591837	0.471154
0.408284	0.480226
0.581633	0.430769
0.166667	0.25
0.307692	0.26
0.282209	0.333333
0.290323	0.333333
0.535135	0.515625
0.327586	0.269231
0.339286	0.28125
0.435897	0.5
0.5	0.533981
0.251748	0.366667
0.43295	0.40393
0.407407	0.436409
0.471698	0.386207
0.380952	0.327511
0.318182	0.521277
0.4	0.5
0.190476	0.316062
0.307692	0.727273
0.478528	0.361702
0.3	0.314286
0.485	0.358696
0.363636	0.5
0.324786	0.420635
0.351351	0.503968
0.290598	0.4375
0.454545	0.38961
0.310811	0.4
0.497238	0.42155
0.487106	0.447205
0.476635	0.409091
0.448276	0.291667
0.255814	0.390244
0.378378	0.322314
0.5	0.25
0.307692	0.421429
0.420168	0.561983
0.31579	0.365759
0.392857	0.431655
0.457831	0.322785
0.222222	0.176471
0.286885	0.417344
0.456311	0.472527
0.45933	0.479167
0.455919	0.6
0.314286	0.409091
0.428571	0.5
0.269231	0.473684
0.416667	0.480861
0.322581	0.277778
0.378378	0.375
0.25	0.437037
0.307692	0.472222
0.340659	0.417391
0.507082	0.185185
0.480349	0.4
0.225	0.446524
0.576923	0.493776
0.333333	0.263158
0.2	0.486395
0.538462	0.480392
0.5	0.307692
0.435936	0.2
0.314516	0.382054
0.285714	0.401786
0.545455	0.297297
0.493976	0.435484
0.449367	0.460526
0.376238	0.379747
0.42953	0.464706
0.458115	0.340909
0.465565	0.483366
0.464174	0.283333
0.280323	0.4
0.484536	0.561856
0.416667	0.411192
0.35	0.485849
0.37037	0.25
0.35	0.413613
0.469657	0.491639
0.25	0.437209
0.333333	0.458204
0.513889	0.438972
0.384615	0.518261
0.525	0.383178
0.285714	0.442478
0.461728	0.534483
0.494465	0.583333
0.35	0.505747
0.411765	0.571429
0.368421	0.508475
0.311111	0.254237
0.462069	0.39834
0.315385	0.421053
0.410526	0.228571
0.446914	0.488372
0.394161	0.26087
0.4375	0.263158
0.25	0.401869
0.519685	0.423358
0.5	0.304432
0.411765	0.448399
0.421687	0.459893
0.45283	0.4375
0.348123	0.220339
0.366667	0.452174
0.413793	0.442049
0.388889	0.555556
0.493827	0.1875
0.4375	0.443099
0.262295	0.511905
0.318182	0.563193
0.556962	0.597826
0.352941	0.441177
0.577465	0.272727
0.352941	0.424779
0.384615	0.487013
0.480226	0.421687
0.461539	0.363636
0.36	0.450331
0.533333	0.485148
0.455752	0.365385
0.308642	0.294118
0.358974	0.368932
0.424242	0.514085
0.1875	0.479769
0.217391	0.460554
0.463636	0.444444
0.416667	0.416595
0.411765	0.321429
0.45283	0.363636
0.446429	0.363636
0.148148	0.388889
0.466667	0.308411
0.73913	0.193548
0.176471	0.477273
0.546784	0.525
0.358621
0.475247
0.417391
0.275
0.317073
0.333333
0.35514
0.388554
0.322222
0.357143
0.408889
0.460526
0.308823
0.531034
0.25
0.346734
0.25
0.333333
0.461539
0.450867
0.214286
0.423631
0.49697
0.506173
0.212766
0.333333
0.394558
0.338028
0.395833
0.377484
0.276173
0.357143
0.431472
0.366667
0.33758
0.370968
0.294118
0.394231
0.547619
0.342105
0.275362
0.254098
0.437956
0.398058
0.458333
0.263158
0.542169
0.373434
0.452991
0.436364
0.375
0.333333
0.533333
0.388889
0.472973
0.365385
0.417344
0.5
0.405405
0.394231
0.319728
0.227273
0.214286
0.384615
0.4
0.318182
0.310127
0.378641
0.415842
0.477778
0.291667
0.523077
0.257143
0.564103
0.25098
0.473684
0.25
0.3125
0.428571
0.49503
0.430769
0.321429
0.546763
0.559211
0.507246
0.470588
0.386667
0.37037
0.370717
0.387324
0.351351
0.322815
0.412121
0.339286
0.575758
0.388889
0.412698
0.386617
0.533333
0.276316
0.410959
0.533333
0.421053
0.6
0.430464
0.42562
0.440367
0.415625
0.210526
0.259259
0.401487
0.321101
0.495495
0.611111
0.378378
0.5
0.40113
0.528455
0.441177
0.571429
0.512295
0.346154
0.538462
0.333333
0.235294
0.423077
0.363636
0.288461
0.466321
0.349206
0.541667
0.364706
0.341014
0.309352
0.25
0.3
0.341226
0.44
0.4
0.295918
0.307692
0.326531
0.333333
0.3
0.454545
0.545455
0.358108
0.15
0.287879
0.395604
0.285714
0.25
0.2
0.25
0.323944
0.247312
0.377049
0.4375
0.446602
0.458333
0.441177
0.45946
0.433333
0.419708
0.272727
0.285714
0.507937
0.420857
0.3
0.307692
0.305556
0.363636
0.326316
0.333333
0.181818
0.466667
0.437063
0.371542
0.361345
0.475961
0.318182
0.307692
0.396476
0.295547
0.475728
0.178571
0.448276
0.5
0.328502
0.210526
0.472727
0.413793
0.217391
0.368159
0.230769
0.289474
0.545455
0.349206
0.34
0.363636
0.478261
0.545455
0.347458
0.4375
0.266667
0.424242
0.361446
0.366577
0.533333
0.472222
0.269767
0.470588
0.420082
0.453125
0.35
0.31579
0.396589
0.407186
0.375
0.272727
0.442049
0.52381
0.487179
0.357143
0.362745
0.439759
0.476191
0.25
0.38255
0.328671
0.283582
0.31579
0.376344
0.58209
0.424242
0.235294
0.441509
0.518518
0.241379
0.336683
0.424528
0.441441
0.473684
0.425532
0.465517
0.666667
0.377049
0.434783
0.43299
0.48
0.583333
0.357143
0.363636
0.306452
0.454787
0.545455
0.272727
0.352941
0.314815
0.3
0.1
0.418182
0.653846
0.428571
0.578947
0.333333
0.373016
0.405884
0.55914
0.454545
0.423913
0.423077
0.447368
0.325397
0.442553
0.325
0.335165
0.5
0.41626
0.44
0.5
0.452174
0.16129
0.513513
0.394737
0.555556
0.531792
0.323809
0.377484
0.361045
0.457143
0.363636
0.5
0.255319
0.433962
0.325926
0.424149
0.409283
0.363636
0.333333
0.384615
0.460317
0.360825
0.473973
0.25
0.361111
0.453125
0.3
0.5
0.4
0.461539
0.4
0.40708
0.333333
0.333333
0.470414
0.369748
0.445055
0.251231
0.333333
0.41433
0.230769
0.529412
0.384615
0.44
0.266667
0.277778
0.454545
0.318182
0.352113
0.412229
0.490196
0.558824
0.4
0.329787
0.428571
0.482353
0.55814
0.277778
0.382353
0.333333
0.307692
0.375
0.463235
0.416667
0.333333
0.524138
0.526316
0.266055
0.324841
0.384615
0.322449
0.413044
0.382353
0.330025
0.375291
0.454545
0.334802
0.355263
0.387879
0.473684
0.302326
0.22807
0.3
0.436441
0.515625
0.409639
0.393617
0.469072
0.302521
0.479452
0.357143
0.4
0.373333
0.424242
0.454545
0.326531
0.514286
0.5
0.369863
0.470588
0.418182
0.416667
0.363636
0.321101
0.266667
0.39763
0.277778
0.266667
0.2
0.205128
0.519685
0.533333
0.255034
0.353846
0.374194
0.5
0.337079
0.185185
0.5
0.388889
0.364583
0.25
0.35
0.461539
0.464706
0.214286
0.364583
0.294118
0.404803
0.269231
0.387755
0.342697
0.369099
0.359223
0.486486
0.25
0.365385
0.510363
0.445454
0.421053
0.456693
0.438597
0.222222
0.5
0.291667
0.333333
0.373341
0.512821
0.40625
0.409742
0.354167
0.413793
0.2
0.444444
0.416058
0.453608
0.583333
0.378947
0.583333
0.405063
0.407407
0.28125
0.351351
0.1875
0.208333
0.4
0.435146
0.421053
0.457711
0.271111
0.494949
0.428571
0.344
0.4
0.549816
0.380952
0.166667
0.785714
0.2
0.166667
0.326087
0.461539
0.387328
0.25
0.443609
0.347826
0.316456
0.384615
0.410562
0.421053
0.363636
0.335312
0.3
0.467213
0.324786
0.331169
0.410256
0.22
0.398148
0.5
0.560847
0.373134
0.375
0.42885
0.263158
0.454545
0.232793
0.25
0.411765
0.411765
0.305949
0.37037
0.268293
0.364444
0.478102
0.37037
0.419287
0.403101
0.393258
0.511628
0.411765
0.411765
0.439394
0.453125
0.307692
0.357143
0.340206
0.465656
0.31579
0.571429
0.5
0.410853
0.407767
0.5
0.472222
0.368421
0.390244
0.4
0.527778
0.173913
0.285714
0.636364
0.241379
0.377551
0.333333
0.339286
0.421687
0.243243
0.38921
0.5
0.181818
0.625
0.538462
0.486957
0.1875
0.4
0.342857
0.40411
0.368421
0.436782
0.245283
0.464286
0.402477
0.28
0.361446
0.517857
0.365854
0.446524
0.446429
0.421053
0.474895
0.448133
0.384615
0.473684
0.512821
0.5
0.407035
0.40625
0.407407
0.315018
0.254545
0.454545
0.323944
0.294118
0.5
0.363636
0.4375
0.37785
0.28
0.54
0.613333
0.422819
0.6
0.375
0.515151
0.4
0.4
0.264706
0.538462
0.333333
0.511848
0.505882
0.351648
0.555556
0.309091
0.27027
0.371585
0.5
0.428571
0.333333
0.392593
0.338583
0.339286
0.266667
0.369565
0.307692
0.389078
0.282609
0.153846
0.486772
0.403846
0.456621
0.366917
0.333333
0.118644
0.217391
0.465116
0.385714
0.395833
0.263158
0.442771
0.2975
0.185185
0.372549
0.435294
0.465116
0.348837
0.366667
0.285714
0.175676
0.52
0.461539
0.303965
0.472527
0.566667
0.424242
0.471429
0.354839
0.431818
0.344828
0.441581
0.352941
0.323741
0.287671
0.31579
0.428571
0.298701
0.237288
0.432763
0.406943
0.5
0.357143
0.3
0.285714
0.384615
0.380952
0.384615
0.31579
0.333333
0.307692
0.0625
0.277778
0.273585
0.354545
0.459538
0.238095
0.377049
0.349693
0.314516
0.41954
0.214286
0.405512
0.333333
0.40678
0.413743
0.178862
0.558621
0.392523
0.407216
0.406571
0.238095
0.472414
0.427632
0.388889
0.402985
0.304348
0.285714
0.385542
0.388889
0.395349
0.442308
0.30303
0.317073
0.2
0.357143
0.443396
0.571429
0.453846
0.539683
0.301887
0.352941
0.348684
0.375
0.452174
0.191781
0.436364
0.333333
0.414838
0.26087
0.421053
0.421053
0.309352
0.42617
0.277778
0.378539
0.26
0.426229
0.278689
0.313725
0.233333
0.210526
0.355311
0.334587
0.285714
0.460526
0.527027
0.417582
0.31405
0.189189
0.206897
0.178571
0.436364
0.431655
0.291667
0.458333
0.55814
0.469758
0.448133
0.326667
0.480769
0.357143
0.290323
0.309278
0.277778
0.37234
0.411765
0.473684
0.458333
0.434579
0.458064
0.21519
0.460795
0.40404
0.594595
0.56051
0.4
0.464286
0.355932
0.384615
0.457792
0.214286
0.464824
0.257143
0.394578
0.315068
0.333333
0.181818
0.317073
0.478098
0.388889
0.487805
0.3
0.533333
0.355556
0.303571
0.379747
0.419048
0.3125
0.5
0.426471
0.230769
0.357143
0.333333
0.363636
0.441331
0.333333
0.426229
0.455446
0.409091
0.404762
0.357143
0.238095
0.440678
0.54717
0.25
0.398649
0.2
0.352941
0.411765
0.428571
0.35
0.5
0.246377
0.363636
0.387097
0.395349
0.434783
0.384615
0.25
0.355932
0.511111
0.38843
0.370166
0.181818
0.107692
0.450382
0.25
0.450704
0.318182
0.214286
0.337423
0.472222
0.4
0.460784
0.454545
0.240741
0.304348
0.309278
0.302632
0.491803
0.435484
0.290909
0.304348
0.421053
0.410714
0.38
0.394927
0.509615
0.349057
0.453125
0.429319
0.503497
0.416667
0.464567
0.5
0.5
0.6
0.344828
0.316667
0.5
0.243243
0.442177
0.506849
0.34375
0.558704
0.331839
0.442159
0.484663
0.386364
0.444444
0.412451
0.327354
0.388889
0.424242
0.272727
0.436735
0.305556
0.2625
0.454191
0.526316
0.5
0.434783
0.511628
0.52381
0.416667
0.454213
0.470588
0.5
0.333333
0.328877
0.2
0.357143
0.388889
0.285714
0.473684
0.333333
0.238095
0.357616
0.348624
0.416667
0.347826
0.449248
0.27451
0.4375
0.418895
0.383648
0.36413
0.435897
0.348387
0.458647
0.263158
0.410853
0.496855
0.4
0.479554
0.230769
0.469565
0.369318
0.323529
0.338462
0.432099
0.428571
0.410072
0.642857
0.340909
0.33002
0.3125
0.423358
0.5
0.316667
0.508621
0.26257
0.539683
0.533981
0.368421
0.424242
0.401235
0.333333
0.313253
0.526087
0.333333
0.423077
0.411765
0.481482
0.322581
0.359223
0.352941
0.37037
0.458333
0.4
0.384615
0.393939
0.481928
0.3125
0.453552
0.354962
0.363636
0.313725
0.365079
0.311688
0.245902
0.369127
0.418327
0.31579
0.296296
0.566667
0.25
0.217391
0.363636
0.321212
0.402367
0.444444
0.385965
0.5625
0.366667
0.449612
0.349112
0.736842
0.254237
0.389381
0.4238
0.452381
0.5
0.564516
0.4
0.529412
0.333333
0.328767
0.31746
0.407407
0.3
0.337004
0.29661
0.266667
0.286713
0.409639
0.352273
0.352941
0.4375
0.318182
0.443396
0.363636
0.285714
0.423077
0.3
0.358491
0.617647
0.375
0.427419
0.309524
0.234177
0.546798
0.404908
0.343003
0.348066
0.331224
0.266667
0.45283
0.404467
0.176471
0.25
0.194444
0.318182
0.583333
0.368421
0.435897
0.476191
0.508475
0.437037
0.476191
0.365314
0.502326
0.409836
0.264957
0.478788
0.400862
0.369565
0.354839
0.366667
0.414773
0.272727
0.269231
0.307692
0.398305
0.555556
0.470297
0.510345
0.465116
0.365217
0.180328
0.397727
0.333333
0.338983
0.510582
0.47153
0.366197
0.380952
0.0769231
0.304762
0.340425
0.333333
0.354331
0.318518
0.470588
0.31068
0.498805
0.3
0.453333
0.314286
0.430851
0.510204
0.373494
0.506329
0.338983
0.442983
0.176471
0.262295
0.552845
0.491039
0.2875
0.4625
0.455497
0.414894
0.264706
0.37069
0.166667
0.5
0.486239
0.444444
0.384615
0.263456
0.354839
0.529412
0.518518
0.533333
0.424242
0.427653
0.406977
0.302326
0.352941
0.485294
0.357143
0.327122
0.323529
0.27907
0.357542
0.443396
0.545455
0.495868
0.432203
0.5
0.318182
0.314685
0.471698
0.522822
0.351351
0.344828
0.372549
0.333333
0.25
0.450495
0.31579
0.333333
0.545455
0.479675
0.163265
0.439024
0.428571
0.408
0.516949
0.40393
0.441559
0.392377
0.391304
0.291667
0.399142
0.447458
0.266667
0.526549
0.484277
0.518421
0.529412
0.480861
0.153846
0.441177
0.396
0.451613
0.283019
0.518672
0.413793
0.347368
0.407942
0.333333
0.365079
0.337209
0.431535
0.25
0.416915
0.30303
0.190476
0.416667
0.454545
0.32
0.551724
0.564103
0.427808
0.24
0.418119
0.529412
0.538462
0.5625
0.498097
0.0833333
0.442424
0.25
0.401575
0.428571
0.333333
0.476191
0.431937
0.236559
0.482143
0.352113
0.307692
0.455882
0.479167
0.359551
0.338028
0.296296
0.705882
0.392593
0.342105
0.262295
0.303571
0.192308
0.342857
0.463492
0.346154
0.272727
0.281356
0.28866
0.479167
0.428571
0.333333
0.367089
0.411765
0.5
0.387387
0.303571
0.436059
0.440678
0.250896
0.390244
0.434783
0.297297
0.38565
0.5
0.473684
0.238095
0.428571
0.29703
0.483721
0.595238
0.330578
0.310345
0.352941
0.322581
0.307692
0.54023
0.333333
0.529032
0.369048
0.295455
0.328358
0.389831
0.5
0.385965
0.311765
0.341176
0.407407
0.422619
0.511364
0.48421
0.457143
0.413145
0.454545
0.479167
0.39207
0.295082
0.176471
0.277778
0.235294
0.344371
0.254545
0.461539
0.264706
0.36
0.411765
0.641509
0.442478
0.538462
0.337349
0.313253
0.216216
0.285714
0.416667
0.388889
0.282258
0.413044
0.333333
0.5
0.2
0.276423
0.413613
0.571429
0.340909
0.472789
0.361702
0.400943
0.485714
0.448276
0.25
0.406504
0.328571
0.438819
0.367857
0.3
0.390805
0.424528
0.2
0.411765
0.34375
0.470588
0.412371
0.266667
0.541667
0.37931
0.319444
0.31579
0.39604
0.369615
0.323529
0.380435
0.310345
0.4375
0.428571
0.153846
0.411192
0.583333
0.15942
0.510204
0.354037
0.561475
0.294118
0.501355
0.166667
0.642857
0.4
0.26506
0.175439
0.482143
0.4
0.470588
0.442623
0.317391
0.55582
0.35
0.421769
0.304348
0.384615
0.3125
0.397769
0.241935
0.4
0.316832
0.387097
0.31579
0.232877
0.475472
0.444444
0.321429
0.545455
0.333333
0.222222
0.327586
0.491228
0.333333
0.372208
0.375
0.3
0.412833
0.324324
0.271186
0.308
0.294118
0.372881
0.409894
0.359375
0.34375
0.461539
0.547059
0.272727
0.238095
0.178571
0.327731
0.508197
0.318182
0.297297
0.389474
0.455224
0.181818
0.4
0.4
0.318182
0.533333
0.416667
0.449275
0.25
0.394161
0.316667
0.320388
0.636364
0.464789
0.388724
0.370787
0.292793
0.339623
0.606061
0.309524
0.444444
0.404494
0.418182
0.695652
0.238095
0.522222
0.395973
0.25
0.407895
0.40625
0.333333
0.410448
0.479167
0.411765
0.425339
0.384615
0.406977
0.34127
0.367647
0.415094
0.433333
0.435555
0.282609
0.423529
0.581439
0.3
0.378378
0.563193
0.454545
0.337349
0.352941
0.222222
0.230769
0.241379
0.310345
0.452381
0.416667
0.533333
0.481818
0.4
0.405594
0.44385
0.560976
0.24
0.363636
0.429907
0.419753
0.528037
0.307692
0.413223
0.192771
0.435714
0.352941
0.425532
0.481482
0.357664
0.475973
0.411622
0.257028
0.2
0.398809
0.420765
0.238095
0.488491
0.375
0.308823
0.5
0.524096
0.461539
0.328571
0.438662
0.31728
0.285714
0.130435
0.458333
0.40636
0.385027
0.1
0.491639
0.330254
0.397727
0.363636
0.445783
0.469314
0.622641
0.546961
0.310924
0.390244
0.28125
0.647059
0.370787
0.365854
0.461847
0.614379
0.44
0.684932
0.306338
0.388889
0.352941
0.463291
0.422059
0.299065
0.3125
0.436409
0.470588
0.469108
0.280488
0.529412
0.133333
0.217391
0.341176
0.230769
0.3
0.418605
0.322581
0.3125
0.546012
0.378049
0.346154
0.51087
0.337209
0.407643
0.36
0.285714
0.578431
0.358974
0.375
0.457875
0.2
0.564103
0.263158
0.324675
0.265625
0.2
0.419355
0.2
0.4
0.375
0.4375
0.465116
0.326667
0.349515
0.404762
0.395639
0.318182
0.419355
0.308271
0.417778
0.417778
0.282051
0.0833333
0.453125
0.366197
0.5
0.533333
0.389098
0.366667
0.421053
0.36413
0.454545
0.492035
0.461539
0.466667
0.409091
0.327103
0.266667
0.479167
0.4375
0.263158
0.25
0.424731
0.34375
0.40625
0.36
0.261539
0.282507
0.333333
0.480769
0.469352
0.36
0.285714
0.401869
0.6
0.269231
0.486452
0.454545
0.4
0.381818
0.428571
0.491667
0.592593
0.336364
0.518518
0.34375
0.5
0.442623
0.410256
0.625
0.348837
0.465116
0.318182
0.420354
0.242857
0.5
0.372093
0.437209
0.117647
0.397661
0.319149
0.315068
0.433103
0.214286
0.471154
0.338235
0.333333
0.48
0.380952
0.5
0.386207
0.4
0.309859
0.388889
0.397516
0.514793
0.375
0.264706
0.458167
0.324324
0.36
0.181818
0.642857
0.3125
0.272727
0.517512
0.444444
0.388235
0.393443
0.431373
0.399002
0.293878
0.455446
0.31579
0.439613
0.241379
0.333333
0.377193
0.537037
0.34375
0.416667
0.477273
0.349057
0.464968
0.266667
0.418848
0.366071
0.366071
0.358491
0.277778
0.330357
0.4975
0.28125
0.325581
0.385321
0.305882
0.4
0.431818
0.1
0.4
0.517241
0.428571
0.363636
0.435374
0.181818
0.373333
0.361011
0.640625
0.483366
0.242424
0.386364
0.365759
0.493151
0.432432
0.465116
0.387097
0.425926
0.300926
0.519337
0.412698
0.352941
0.447917
0.40501
0.513699
0.352113
0.409091
0.380282
0.401575
0.45
0.413077
0.436291
0.214286
0.490598
0.428571
0.3125
0.307692
0.378713
0.490196
0.392857
0.538462
0.473684
0.26087
0.247312
0.313725
0.25
0.476191
0.416667
0.342857
0.457064
0.3
0.35443
0.230769
0.361486
0.25
0.463415
0.236842
0.496503
0.410256
0.177778
0.263158
0.358974
0.364486
0.2
0.435484
0.478992
0.497006
0.529412
0.498413
0.378788
0.333333
0.172414
0.268657
0.222222
0.318182
0.423077
0.590551
0.312977
0.448276
0.416382
0.403846
0.275
0.448087
0.291667
0.5
0.479167
0.461539
0.357143
0.391304
0.286325
0.403846
0.482353
0.327511
0.358696
0.4
0.377778
0.338028
0.333333
0.423529
0.367958
0.349515
0.339623
0.333333
0.333333
0.358696
0.54023
0.543478
0.233333
0.4
0.349206
0.354839
0.489362
0.323529
0.421053
0.4375
0.481482
0.481482
0.4
0.4375
0.364583
0.444444
0.447368
0.2
0.239437
0.394737
0.58427
0.503759
0.306452
0.3
0.45
0.290323
0.385246
0.277778
0.353658
0.461539
0.333333
0.5
0.424
0.271318
0.230769
0.1
0.397059
0.416595
0.42446
0.424561
0.419811
0.361702
0.378378
0.222222
0.399498
0.380645
0.551724
0.467533
0.366907
0.377484
0.352941
0.235294
0.283333
0.277108
0.516624
0.2
0.42029
0.403361
0.449102
0.341772
0.222222
0.473684
0.412017
0.4
0.423168
0.363636
0.546275
0.526717
0.297872
0.266667
0.316667
0.515038
0.488889
0.421053
0.482353
0.397727
0.393939
[truncated: 2,575 more rows]
