# Supplementary material for: Eukaryotic initiation factor EIF-3.G augments mRNA translation efficiency to regulate neuronal activity
Source: eLife. 2021 Jul 29;10:e68336. doi: 10.7554/eLife.68336 (PMC8354637; doi:10.7554/eLife.68336)
Supplement: Figure 5—source data 1. — Foldchange in transcript expression in the cholinergic neuronal transcriptome of acr-2(gf) and wild-type animals. [file elife-68336-fig5-data1.xlsx]

## Sheet: Figure 5B
gene_name	log2(fc)	process/pathway
gldc-1	1.66099	metabolism
elo-6	1.2289	metabolism
far-8	1.17701	metabolism
aco-1	1.14617	metabolism
T02G5.7	0.788601	metabolism
elo-1	0.752149	metabolism
pygl-1	-0.572896	metabolism
alh-9	-0.910535	metabolism
nlp-71	3.55973	neuropeptide signaling
flp-12	2.89708	neuropeptide signaling
flp-18	2.36724	neuropeptide signaling
flp-11	2.23273	neuropeptide signaling
flp-14	2.22842	neuropeptide signaling
flp-9	2.06247	neuropeptide signaling
nlp-21	1.8685	neuropeptide signaling
nlp-40	1.44162	neuropeptide signaling
egl-3	1.19902	neuropeptide signaling
pdf-1	1.08989	neuropeptide signaling
sbt-1	0.912298	neuropeptide signaling
nlp-9	0.866543	neuropeptide signaling
nlp-24	-1.08393	neuropeptide signaling
snt-4	0.550937	calcium signaling
T26C5.5	3.88374	NULL
T22E5.1	2.40901	NULL
C13A10.2	2.18526	NULL
T27C4.1	1.27317	NULL
Y119D3B.21	1.22974	NULL
M02H5.8	1.0225	NULL
sdz-24	1.00516	NULL
nhr-97	0.622398	NULL
oma-2	-0.730697	NULL
pos-1	-0.828107	NULL
ttr-24	-0.918113	NULL
clec-88	-0.94668	NULL
col-143	-1.002	NULL
ttr-45	-1.00451	NULL
C10G8.4	-1.02622	NULL
cpg-8	-1.14072	NULL
T28B8.1	-1.22803	NULL
col-103	-1.34316	NULL
col-98	-1.44799	NULL
F57F5.1	-1.1569	protein metabolism
C42D4.1	-1.30631	protein metabolism
F31F7.1	1.63436	response to stress
ZK6.11	0.957119	response to stress
pnp-1	0.865807	response to stress
