# Supplementary material for: Eukaryotic initiation factor EIF-3.G augments mRNA translation efficiency to regulate neuronal activity
Source: eLife. 2021 Jul 29;10:e68336. doi: 10.7554/eLife.68336 (PMC8354637; doi:10.7554/eLife.68336)
Supplement: Figure 6—figure supplement 1—source data 1. — Quantification of relative fluorescence intensity in strains of the indicated genotypes. [file elife-68336-fig6-figsupp1-data1.xlsx]

## Sheet: Figure 6- figure supplement 1
sqIs17 (hlh-30::GFP)
VNC fluorescence											background fluorescence
Replicate	Area	mean	min	max	IntDen	RawIntDen	Avg Area	Avg IntDen			Replicate	Area	mean	min	max	IntDen	RawIntDen	total background (TB)	IntDen-TB (Adj)	RFU	normalized RFU
1	7.132	63.86	17	111	455.423	104475	7.39333	441.083			1	9.368	0.201	0	5	1.879	431	1.48606	439.597	59.4585	1.02002
1	6.556	58.966	23	105	386.592	88685	7.024	414.335			2	9.102	0.189	0	6	1.722	395	1.32754	413.007	58.7995	1.00871
1	8.492	56.671	8	126	481.233	110396	12.1823	664.371			3	14.834	0.902	0	8	13.387	3071	10.9885	653.383	53.6336	0.92009
2	5.798	69.978	16	121	405.711	93071	10.732	739.873			4	6.992	0.85	0	10	5.946	1364	9.1222	730.751	68.0909	1.1681
2	5.54	52.391	8	118	290.272	66589	7.32167	541.442			5	15.745	0.574	0	7	9.041	2074	4.20264	537.239	73.3766	1.25878
2	9.734	56.197	10	135	547.022	125488	7.26367	328.914			6	97.366	0.57	0	14	55.453	12721	4.14029	324.774	44.7121	0.76704
3	12.411	51.738	1	130	642.095	147298	7.92067	513.722			7	6.822	0.266	0	6	1.818	417	2.1069	511.615	64.5924	1.10809
3	10.854	51.178	4	132	555.504	127434	13.342	586.587			8	11.146	0.295	0	6	3.287	754	3.93589	582.651	43.6704	0.74917
3	13.282	59.893	6	126	795.515	182493													Average	58.2918
4	12.031	73.36	12	166	882.615	202474													std dev	10.5883
4	10.414	68.789	12	158	716.375	164338													std error	3.74352
4	9.751	63.645	13	143	620.63	142374
5	6.97	119.518	4	255	833.074	191109
5	6.486	42.982	8	117	278.798	63957
5	8.509	60.224	12	133	512.453	117558
6	5.963	37.863	2	76	225.791	51797
6	6.935	40.99	4	94	284.282	65215
6	8.893	53.602	3	113	476.669	109349
7	6.356	55.154	8	118	350.541	80415
7	7.812	51.368	5	138	401.269	92052
7	9.594	82.272	9	224	789.356	181080
8	15.152	40.931	3	149	620.199	142275
8	13.457	41.999	7	104	565.169	129651
8	11.417	50.312	2	118	574.393	131767
ju807; sqIs17 (hlh-30::GFP)
VNC fluorescence											background fluorescence
Replicate	Area	mean	min	max	IntDen	RawIntDen	Avg Area	Avg IntDen			Replicate	Area	mean	min	max	IntDen	RawIntDen	total background (TB)	IntDen-TB (Adj)	RFU	normalized RFU
1	10.161	61.879	16	119	628.764	144240	10.3763	607.801			1	11.247	0.683	0	8	7.676	1761	7.08704	600.714	57.8927	0.993154
1	9.717	62.716	6	125	609.379	139793	8.583	475.431			2	14.272	0.431	0	6	6.146	1410	3.69927	471.732	54.9612	0.942864
1	11.251	52.019	11	105	585.26	134260	12.5457	579.813			3	9.241	0.174	0	7	1.604	368	2.18295	577.63	46.0422	0.789857
2	7.768	102.481	21	244	796.077	182622	5.66833	310.676			4	3.697	0.597	0	6	2.206	506	3.384	307.292	54.212	0.930011
2	8.914	33.593	5	78	299.465	68698	9.92467	499.946			5	6.051	0.445	0	6	2.694	618	4.41648	495.529	49.9291	0.856537
2	9.067	36.478	3	80	330.751	75875	11.8293	720.237			6	14.071	0.324	0	7	4.56	1046	3.8327	716.404	60.5617	1.03894
3	11.068	56.352	11	118	623.699	143078	8.20967	471.817			7	4.9	0.105	0	3	0.514	118	0.862015	470.955	57.3659	0.984118
3	13.513	41.357	2	97	558.874	128207	8.22833	413.794			8	9.368	0.242	0	5	2.271	521	1.99126	411.803	50.0469	0.858559
3	13.056	42.653	7	127	556.865	127746													Average	57.8927
4	4.913	74.08	25	148	363.937	83488													std dev	#DIV/0!
4	6.957	36.046	8	84	250.778	57529													std error	#DIV/0!
4	5.135	61.793	7	142	317.312	72792
5	10.92	64.55	8	141	704.871	161699
5	9.146	67.332	22	118	615.787	141263
5	9.708	18.457	0	52	179.179	41104
6	12.302	90.318	21	186	1111.05	254878
6	11.591	47.582	4	108	551.52	126520
6	11.595	42.96	8	103	498.138	114274
7	6.547	100.295	30	219	656.676	150643
7	8.147	42.535	16	86	346.544	79498
7	9.935	41.495	8	82	412.232	94567
8	7.275	70.109	15	130	510.073	117012
8	8.326	41.654	10	117	346.814	79560
8	9.084	42.324	9	89	384.495	88204
sqIs17;n2420 (hlh-30::GFP)
VNC fluorescence											background fluorescence
Replicate	Area	mean	min	max	IntDen	RawIntDen	Avg Area	Avg IntDen			Replicate	Area	mean	min	max	IntDen	RawIntDen	total background (TB)	IntDen-TB (Adj)	RFU	normalized RFU
1	6.569	54.078	5	153	355.249	81495	7.42067	437.012			1	11.704	0.063	0	4	0.741	170	0.467502	436.545	58.8282	1.0092
1	7.005	49.836	7	150	349.107	80086	10.2963	522.025			2	14.285	0.06	0	5	0.85	195	0.61778	521.407	50.6401	0.868734
1	8.688	69.831	13	178	606.681	139174	8.961	597.882			3	9.058	1.561	0	10	14.141	3244	13.9881	583.894	65.1594	1.11782
2	9.18	47.89	13	100	439.651	100857	8.43367	493.889			4	13.409	0.06	0	6	0.811	186	0.50602	493.383	58.5016	1.0036
2	10.471	34.861	3	93	365.023	83737	7.252	442.787			5	16.521	0.188	0	7	3.099	711	1.36338	441.423	60.8692	1.04422
2	11.238	67.753	16	141	761.4	174667	10.937	520.952			6	26.534	0.434	0	12	11.517	2642	4.74666	516.206	47.1981	0.809687
3	7.04	65.794	25	113	463.191	106257	8.932	543.103			7	8.949	0.356	0	6	3.187	731	3.17979	539.923	60.4481	1.03699
3	10.523	52.31	4	133	550.457	126276	10.407	440.711			8	33.225	0.1	0	6	3.335	765	1.0407	439.67	42.2475	0.72476
3	9.32	83.692	9	160	779.997	178933													Average	55.4865
4	7.149	60.018	16	145	429.067	98429													std dev	7.8819
4	8.54	47.003	5	139	401.382	92078													std error	2.78667
4	9.612	67.751	10	175	651.218	149391
5	6.338	53.856	0	107	341.352	78307
5	7.275	52.575	1	181	382.507	87748
5	8.143	74.237	7	155	604.501	138674
6	13.195	37.393	1	85	493.404	113188
6	9.202	45.867	8	133	422.075	96825
6	10.414	62.164	6	179	647.378	148510
7	7.193	31.243	3	80	224.719	51551
7	8.74	50.629	3	145	442.506	101512
7	10.863	88.565	10	253	962.083	220704
8	10.131	46.624	4	129	472.336	108355
8	10.266	40.662	5	118	417.433	95760
8	10.824	39.946	1	114	432.363	99185
ju807; sqIs17;n2420 (hlh-30::GFP)
VNC fluorescence											background fluorescence
Replicate	Area	mean	min	max	IntDen	RawIntDen	Avg Area	Avg IntDen			Replicate	Area	mean	min	max	IntDen	RawIntDen	total background (TB)	IntDen-TB (Adj)	RFU	normalized RFU
1	6.831	28.657	6	73	195.752	44906	8.685	391.734			1	16.443	0.344	0	6	5.663	1299	2.98764	388.746	44.7607	0.767873
1	8.666	26.813	0	75	232.365	53305	7.29433	328.778			2	12.694	0.281	0	10	3.57	819	2.04971	326.728	44.792	0.768411
1	10.558	70.761	0	177	747.085	171383	10.0683	481.238			3	26.534	0.434	0	12	11.517	2642	4.36966	476.868	47.3632	0.812519
2	6.696	54.298	10	106	363.558	83401	7.191	372.365			4	14.865	0.138	0	5	2.053	471	0.992358	371.372	51.644	0.885958
2	6.713	48.04	2	93	322.499	73982	8.94933	501.015			5	8.949	0.356	0	6	3.187	731	3.18596	497.829	55.6275	0.954294
2	8.474	35.434	2	86	300.276	68884	11.126	688.461			6	5.196	0.234	0	8	1.216	279	2.60348	685.858	61.6446	1.05752
3	8.762	50.069	5	108	438.697	100638	8.90733	512.137			7	13.513	0.811	0	10	10.963	2515	7.22385	504.913	56.6851	0.972437
3	11.09	37.549	2	96	416.404	95524	10.7933	600.927			8	9.826	0.147	0	6	1.447	332	1.58662	599.34	55.5288	0.952601
3	10.353	56.854	5	110	588.612	135029													Average	52.2557
4	6.547	37.276	1	78	244.065	55989													std dev	6.16495
4	6.399	50.482	2	127	323.048	74108													std error	2.17964
4	8.627	63.753	2	149	549.981	126167
5	9.119	58.329	6	161	531.926	122025
5	8.74	50.336	5	124	439.943	100924
5	8.989	59.095	4	129	531.176	121853
6	11.225	73.087	12	177	820.388	188199
6	11.05	42.817	11	108	473.151	108542
6	11.103	69.518	17	154	771.845	177063
7	7.546	56.084	7	106	423.191	97081
7	9.071	41.844	7	134	379.582	87077
7	10.105	72.605	22	169	733.637	168298
8	8.265	67.487	10	162	557.776	127955
8	11.7	37.851	3	86	442.855	101592
8	12.415	64.612	16	184	802.15	184015
