# Supplementary material for: Eukaryotic initiation factor EIF-3.G augments mRNA translation efficiency to regulate neuronal activity
Source: eLife. 2021 Jul 29;10:e68336. doi: 10.7554/eLife.68336 (PMC8354637; doi:10.7554/eLife.68336)
Supplement: Figure 6—source data 1. — Quantification of relative fluorescence intensity in strains of the indicated genotypes. [file elife-68336-fig6-data1.xlsx]

## Sheet: Figure 6C
OP433-- hlh-30::GFP
VNC fluorescence											background fluorescence
Replicate	Area	mean	min	max	IntDen	RawIntDen	Avg Area	Avg IntDen			Replicate	Area	mean	min	max	IntDen	RawIntDen	total background (TB)	IntDen-TB (Adj)	RFU	normalized RFU
1	11.818	19.349	1	61	228.655	52454	11.1913	283.011			1	12.511	0.134	0	4	1.683	386	1.49964	281.511	25.1544	1.09774
1	10.283	29.665	1	74	305.054	69980	12.0007	261.353			2	6.343	0.131	0	5	0.833	191	1.57209	259.781	21.6472	0.944689
1	11.473	27.483	1	77	315.324	72336	11.5097	277.608			3	11.072	0.162	0	4	1.796	412	1.86457	275.744	23.9576	1.04551
2	12.341	18.196	1	48	224.557	51514	9.90367	216.032			4	10.257	0.099	0	7	1.02	234	0.980463	215.052	21.7144	0.94762
2	11.983	26.411	1	62	316.492	72604	11.7017	237.003			5	13.513	0.239	0	5	3.234	742	2.7967	234.206	20.0148	0.873448
2	11.678	20.809	0	55	243.01	55747	10.7063	247.039			6	15.126	0.23	0	7	3.474	797	2.46246	244.577	22.8441	0.996922
3	13.487	25.872	0	67	348.937	80047	8.595	215.903			7	20.026	0.295	0	8	5.911	1356	2.53553	213.367	24.8246	1.08335
3	11.434	27.092	0	72	309.775	71063	9.99833	235.652			8	7.772	0.409	0	8	3.178	729	4.08932	231.562	23.1601	1.01071
3	9.608	18.123	1	54	174.113	39942													Average	22.9146
4	13.587	23.678	1	67	321.727	73805													std dev	1.74331
4	9.346	20.293	1	50	189.658	43508													std error	0.616352
4	6.778	20.168	2	52	136.712	31362
5	11.125	15.763	0	41	175.351	40226
5	11.081	23.911	0	74	264.954	60781
5	12.899	20.987	0	67	270.703	62100
6	11.574	18.134	0	46	209.876	48146
6	11.168	28.446	0	72	317.686	72878
6	9.377	22.775	2	62	213.555	48990
7	9.843	27.821	3	69	273.842	62820
7	10.349	25.333	3	69	262.164	60141
7	5.593	19.973	6	53	111.703	25625
8	6.975	21.661	1	61	151.075	34657
8	10.771	23.423	2	71	252.295	57877
8	12.249	24.784	2	71	303.585	69643
ju807; hlh-30::GFP
VNC fluorescence											background fluorescence
Replicate	Area	mean	min	max	IntDen	RawIntDen	Avg Area	Avg IntDen			Replicate	Area	mean	min	max	IntDen	RawIntDen	total background (TB)	IntDen-TB (Adj)	RFU	normalized RFU
1	8.919	24.152	3	55	215.412	49416	9.39967	280.706			1	11.308	0.012	0	4	0.135	31	0.112796	280.594	29.8514	1.30272
1	7.454	35.802	5	87	266.872	61221	10.5157	285.74			2	41.046	0.031	0	6	1.282	294	0.325986	285.414	27.1418	1.18447
1	11.826	30.426	2	73	359.835	82547	9.39667	190.382			3	31.273	0.025	0	5	0.785	180	0.234917	190.147	20.2356	0.883084
2	9.337	22.513	1	81	210.207	48222	11.2917	269.762			4	40.941	0.028	0	5	1.129	259	0.316167	269.446	23.8624	1.04136
2	8.98	30.609	1	84	274.862	63054	9.821	309.073			5	12.084	0.026	0	3	0.309	71	0.255346	308.818	31.4446	1.37225
2	13.23	28.129	0	83	372.15	85372	9.74833	184.481			6	26.974	0.023	0	4	0.628	144	0.224212	184.257	18.9014	0.82486
3	10.837	16.951	1	48	183.699	42141	10.8583	185.805			7	33.43	0.027	0	4	0.911	209	0.293175	185.511	17.0847	0.745581
3	8.949	24.882	2	67	222.674	51082	8.45533	183.61			8	9.895	0.001	0	2	0.013	3	0.00845533	183.602	21.7143	0.947618
3	8.404	19.605	1	50	164.772	37799													Average	23.7795
4	9.281	20.935	1	56	194.292	44571													std dev	5.24234
4	11.582	25.584	0	83	296.327	67978													std error	1.85345
4	13.012	24.49	0	86	318.667	73103
5	9.481	27.339	6	59	259.204	59462
5	9.921	36.284	5	82	359.988	82582
5	10.061	30.616	2	81	308.027	70662
6	9.246	16.303	1	45	150.731	34578
6	8.779	20.991	0	59	184.283	42275
6	11.22	19.467	1	50	218.429	50108
7	13.404	17.764	0	49	238.11	54623
7	9.385	19.533	1	57	183.32	42054
7	9.786	13.895	0	40	135.984	31195
8	8.448	20.941	2	57	176.908	40583
8	7.672	17.651	2	49	135.421	31066
8	9.246	25.796	1	77	238.502	54713
n2420; hlh-30::GFP
VNC fluorescence											background fluorescence
Replicate	Area	mean	min	max	IntDen	RawIntDen	Avg Area	Avg IntDen			Replicate	Area	mean	min	max	IntDen	RawIntDen	total background (TB)	IntDen-TB (Adj)	RFU	normalized RFU
1	10.658	26.638	1	80	283.916	65131	11.7727	313.079			1	8.195	0.04	0	4	0.331	76	0.470907	312.608	26.5537	1.15881
1	11.569	29.62	1	85	342.677	78611	8.00367	257.494			2	12.389	0.049	0	4	0.602	138	0.39218	257.102	32.123	1.40186
1	13.091	23.883	1	71	312.643	71721	7.58667	229.909			3	30.967	0.094	0	8	2.925	671	0.713147	229.196	30.2103	1.31839
2	7.097	27.897	3	72	197.98	45417	8.451	353.639			4	6.207	0.054	0	3	0.336	77	0.456354	353.183	41.7919	1.82381
2	9.102	31.512	3	81	286.824	65798	9.55533	354.943			5	11.77	0.073	0	4	0.863	198	0.697539	354.245	37.073	1.61788
2	7.812	36.827	8	89	287.678	65994	8.79833	280.018			6	12.145	0.083	0	4	1.007	231	0.730262	279.287	31.7432	1.38528
3	7.607	21.625	1	65	164.497	37736	12.0503	300.725			7	9.695	0.075	0	4	0.724	166	0.903775	299.821	24.8807	1.0858
3	7.062	35.554	4	81	251.074	57597	8.99033	308.717			8	9.451	0.069	0	4	0.65	149	0.620333	308.096	34.2697	1.49554
3	8.091	33.886	7	72	274.156	62892													Average	32.3307
4	8.396	40.518	8	107	340.18	78038													std dev	5.471
4	8.034	44.063	7	108	353.998	81208													std error	1.93429
4	8.923	41.1	5	135	366.74	84131
5	10.083	37.597	1	103	379.081	86962
5	10.405	41.796	8	95	434.895	99766
5	8.178	30.675	5	70	250.852	57546
6	9.808	31.257	2	85	306.571	70328
6	8.265	34.244	5	81	283.022	64926
6	8.322	30.097	4	74	250.46	57456
7	9.608	27.404	3	88	263.284	60398
7	12.114	27.848	1	72	337.351	77389
7	14.429	20.898	1	66	301.54	69174
8	7.437	31.103	6	82	231.301	53061
8	9.111	40.331	6	92	367.437	84291
8	10.423	31.413	0	75	327.412	75109
ju807; n2420-- hlh-30::GFP
VNC fluorescence											background fluorescence
Replicate	Area	mean	min	max	IntDen	RawIntDen	Avg Area	Avg IntDen			Replicate	Area	mean	min	max	IntDen	RawIntDen	total background (TB)	IntDen-TB (Adj)	RFU	normalized RFU
1	10.03	17.226	0	60	172.788	39638	10.1263	215.781			1	74.354	0.031	0	5	2.328	534	0.313916	215.467	21.2779	0.928572
1	8.906	26.444	1	73	235.503	54025	11.95	226.69			2	26.626	0.09	0	5	2.398	550	1.0755	225.615	18.8799	0.823923
1	11.443	20.891	2	72	239.052	54839	9.59167	165.571			3	11.469	0.079	0	4	0.911	209	0.757742	164.813	17.183	0.749868
2	13.496	19.717	0	50	266.1	61044	10.8673	299.519			4	22.907	0.114	0	10	2.602	597	1.23888	298.28	27.4474	1.19781
2	9.503	21.663	2	54	205.865	47226	9.644	167.704			5	19.734	0.068	0	5	1.351	310	0.655792	167.048	17.3215	0.755913
2	12.851	16.194	0	56	208.106	47740	11.0027	147.032			6	15.126	0.083	0	4	1.26	289	0.913221	146.118	13.2803	0.579554
3	9.329	18.816	0	48	175.53	40267	11.7393	171.123			7	7.629	0.076	0	4	0.58	133	0.892189	170.23	14.5009	0.632821
3	8.666	16.187	0	48	140.278	32180	11.0797	245.823			8	20.898	0.072	0	4	1.508	346	0.797736	245.025	22.1148	0.965096
3	10.78	16.781	0	47	180.905	41500													Average	19.0007
4	10.126	28.395	2	78	287.539	65962													std dev	4.55664
4	11.133	29.325	2	74	326.483	74896													std error	1.61101
4	11.343	25.086	1	84	284.535	65273
5	10.196	12.656	0	40	129.04	29602
5	9.189	18.505	1	68	170.046	39009
5	9.547	21.372	3	63	204.026	46804
6	10.449	9.539	0	32	99.668	22864
6	10.789	14.792	0	46	159.589	36610
6	11.77	15.45	0	46	181.838	41714
7	10.641	12.515	0	37	133.163	30548
7	11.517	16.829	0	48	193.812	44461
7	13.06	14.272	0	42	186.393	42759
8	10.462	20.332	1	55	212.718	48798
8	9.625	23.649	1	65	227.626	52218
8	13.152	22.592	0	58	297.124	68161
unc-13(s69); hlh-30::GFP
VNC fluorescence											background fluorescence
Replicate	Area	mean	min	max	IntDen	RawIntDen	Avg Area	Avg IntDen			Replicate	Area	mean	min	max	IntDen	RawIntDen	total background (TB)	IntDen-TB (Adj)	RFU	Normalized RFU
1	7.275	24.547	2	66	178.59	40969	9.163	263.403			1	10.061	0.247	0	15	2.485	570	2.26326	261.14	28.4994	17.6903
1	7.685	31.618	3	81	242.988	55742	9.10067	275.52			2	3.958	0.132	0	4	0.523	120	1.20129	274.319	30.1427	18.7104
1	10.183	25.486	1	81	259.522	59535	8.381	227.033			3	4.577	0.089	0	3	0.405	93	0.745909	226.287	27.0001	16.7597
2	9.721	24.068	2	58	233.96	53671	8.97433	242.154			4	2.79	0.234	0	5	0.654	150	2.09999	240.054	26.749	16.6038
2	9.146	30.69	5	78	280.673	64387	8.147	267.874			5	13.025	0.098	0	5	1.277	293	0.798406	267.076	32.7821	20.3487
2	8.056	26.295	4	70	211.829	48594	8.92	198.86			6	4.307	0.111	0	4	0.48	110	0.99012	197.87	22.1827	13.7694
3	11.212	25.364	1	65	284.369	65235	7.23167	169.908			7	2.633	0.235	0	5	0.619	142	1.69944	168.209	23.26	14.4381
3	7.916	28.443	2	70	225.159	51652	11.0913	358.26			8	6.822	0.233	0	5	1.587	364	2.58428	355.676	32.0679	19.9054
3	8.361	33.571	2	79	280.682	64389													Average	27.8355
4	8.71	27.634	6	62	240.682	55213													std dev	3.83431
4	8.505	36.381	1	87	309.413	70980													std error	1.21252
4	10.087	27.408	0	81	276.466	63422
5	8.108	35.687	2	93	289.352	66378
5	9.616	34.968	3	89	336.265	77140
5	6.717	26.499	2	70	178.006	40835
6	6.778	17.968	2	50	121.799	27941
6	9.01	25.673	0	72	231.327	53067
6	10.972	22.189	1	61	243.454	55849
7	6.473	20.098	2	58	130.099	29845
7	7.506	26.836	2	69	201.441	46211
7	7.716	23.094	5	53	178.185	40876
8	7.829	27.764	3	69	217.365	49864
8	10.593	34.229	3	75	362.581	83177
8	14.852	33.318	1	84	494.834	113516
unc-13(s69); n2420; hlh-30::GFP
VNC fluorescence											background fluorescence
Replicate	Area	mean	min	max	IntDen	RawIntDen	Avg Area	Avg IntDen			Replicate	Area	mean	min	max	IntDen	RawIntDen	total background (TB)	IntDen-TB (Adj)	RFU	Normalized RFU
1	7.759	26.752	5	65	207.574	48594	6.55767	194.331			1	5.318	0.137	0	5	0.728	167	0.8984	193.433	29.4972	18.3097
1	5.728	34.553	5	83	197.914	40741	8.51767	224.139			2	4.73	0.11	0	4	0.519	119	0.936943	223.202	26.2046	16.2659
1	6.186	28.696	5	69	177.505	65491	8.60333	235.752			3	4.577	0.118	0	3	0.541	124	1.01519	234.736	27.2844	16.9361
2	6.282	31.3	6	87	196.611	50974	9.073	274.962			4	9.538	0.14	0	4	1.338	307	1.27022	273.692	30.1656	18.7246
2	9.594	28.506	2	70	273.502	77585	10.2223	297.489			5	3.278	0.097	0	3	0.318	73	0.991566	296.497	29.0049	18.0041
2	9.677	20.905	0	55	202.304	67714	8.44233	244.069			6	6.469	0.091	0	3	0.588	135	0.768252	243.301	28.8191	17.8888
3	8.073	28.158	3	67	227.321	45103	11.3123	341.723			7	3.191	0.283	0	6	0.902	207	3.20139	338.521	29.925	18.5752
3	9.032	30.985	2	78	279.858	62742	9.41867	293.338			8	9.503	0.272	0	6	2.581	592	2.56188	290.776	30.8723	19.1633
3	8.705	22.983	1	72	200.076	46409													Average	28.9716
4	8.3	30.585	3	65	253.851	52148													std dev	1.54692
4	7.437	33.671	1	96	250.403	64200													std error	0.489179
4	11.482	27.925	1	77	320.633	45898
5	8.784	31.487	3	82	276.575	58234
5	11.238	28.682	1	72	322.32	57443
5	10.645	27.578	1	70	293.572	73554
6	7.65	25.348	3	69	193.917	63447
6	7.764	33.117	6	73	257.107	73941
6	9.913	28.366	3	63	281.183	67346
7	10.737	38.705	5	102	415.558	44485
7	11.343	26.177	2	68	296.915	58981
7	11.857	26.372	2	69	312.695	64504
8	7.28	27.042	2	68	196.859	95330
8	9.115	36.084	6	92	328.907	68113
8	11.861	29.866	0	91	354.247	71733
unc-13(s69); ju807; n2420; hlh-30::GFP
VNC fluorescence											background fluorescence
Replicate	Area	mean	min	max	IntDen	RawIntDen	Avg Area	Avg IntDen			Replicate	Area	mean	min	max	IntDen	RawIntDen	total background (TB)	IntDen-TB (Adj)	RFU	Normalized RFU
1	7.201	31.443	5	82	226.432	51944	7.486	236.693			1	4.948	0.091	0	4	0.449	103	0.681226	236.012	31.5271	19.5697
1	8.548	35.073	5	89	299.814	68778	7.16633	221.721			2	12.79	0.092	0	4	1.181	271	0.659303	221.061	30.8472	19.1477
1	6.709	27.402	3	79	183.834	42172	7.51067	205.415			3	4.255	0.07	0	3	0.296	68	0.525747	204.89	27.2798	16.9333
2	6.447	32.596	7	91	210.15	48209	10.478	247.975			4	2.685	0.133	0	5	0.357	82	1.39357	246.581	23.5333	14.6077
2	7.864	33.822	6	92	265.969	61014	9.69367	256.577			5	4.167	0.175	0	5	0.728	167	1.69639	254.881	26.2935	16.3211
2	7.188	26.299	2	69	189.043	43367	7.322	227.609			6	3.853	0.069	0	3	0.266	61	0.505218	227.103	31.0166	19.2528
3	7.088	22.45	3	56	159.127	36504	8.78067	263.328			7	5.658	0.163	0	4	0.92	211	1.43125	261.897	29.8265	18.5141
3	8.317	29.517	1	73	245.499	56318	8.91767	301.96			8	7.254	0.064	0	3	0.466	107	0.570731	301.389	33.7969	20.9786
3	7.127	29.692	3	78	211.62	48546													Average	29.2651
4	9.865	18.454	1	47	182.047	41762													std dev	3.32019
4	9.424	27.443	0	69	258.633	59331													std error	1.04994
4	12.145	24.969	2	66	303.245	69565
5	7.472	25.966	1	62	194.004	44505
5	9.416	29.202	4	69	274.958	63076
5	12.193	24.668	1	82	300.769	68997
6	5.994	33.639	7	83	201.628	46254
6	7.254	32.031	5	72	232.343	53300
6	8.718	28.544	3	67	248.855	57088
11	7.668	30.25	4	70	231.951	53210
7	8.574	33.927	1	97	290.904	66734
7	10.1	26.448	1	72	267.129	61280
8	7.934	29.153	0	79	231.288	53058
8	9.377	40.554	2	134	380.253	87231
8	9.442	31.174	3	77	294.339	67522
