# Supplementary material for: Eukaryotic initiation factor EIF-3.G augments mRNA translation efficiency to regulate neuronal activity
Source: eLife. 2021 Jul 29;10:e68336. doi: 10.7554/eLife.68336 (PMC8354637; doi:10.7554/eLife.68336)
Supplement: Figure 7—figure supplement 1—source data 1. [file elife-68336-fig7-figsupp1-data1.xlsx]

## Sheet: Fig7- fig supp 1B
CZ28277
VNC fluorescence											background fluorescence
Replicate	Area	mean	min	max	IntDen	RawIntDen	Avg Area	Avg IntDen			Replicate	Area	mean	min	max	IntDen	RawIntDen	total background (TB)	IntDen-TB (Adj)	RFU	normalized RFU
1	12.655	53.582	10	99	678.062	155549	12.008	501.412			1	11.159	2.871	0	18	32.035	7349	34.475	466.937	38.8855	0.928737
1	10.309	25.859	2	63	266.593	61157	9.256	443.017			2	5.231	1.064	0	8	5.567	1277	9.84838	433.168	46.7986	1.11773
1	13.06	42.847	10	85	559.58	128369	11.838	436.7			3	12.206	0.168	0	6	2.049	470	1.98878	434.712	36.7217	0.877058
2	10.083	65.12	15	115	656.585	150622	10.103	521.205			4	5.981	0.686	0	7	4.102	941	6.93066	514.274	50.9031	1.21577
2	8.762	33.599	8	86	294.391	67534	7.896	377.438			5	8.182	1.125	0	10	9.202	2111	8.883	368.555	46.6761	1.11481
2	8.923	42.37	9	88	378.074	86731	6.91667	271.79			6	7.057	0.522	0	6	3.683	845	3.6105	268.18	38.773	0.92605
3	11.36	48.143	12	109	546.904	125461	10.202	454.654			7	8.579	0.614	0	8	5.27	1209	6.26403	448.39	43.9512	1.04973
3	10.933	28.809	8	66	314.958	72252	9.67733	320.043			8	7.419	0.827	0	7	6.138	1408	8.00315	312.04	32.2444	0.770123
3	13.221	33.903	8	78	448.239	102827													Average	41.8692
4	9.115	70.325	11	128	641.014	147050													std dev	6.22179
4	10.074	37.87	5	97	381.504	87518													std error	2.07393
4	11.12	48.659	3	113	541.097	124129
5	7.254	60.44	16	117	438.409	100572
5	9.198	38.612	5	100	355.145	81471
5	7.236	46.814	13	82	338.759	77712
6	7.145	51.9	8	117	370.807	85064
6	6.399	30.294	3	64	193.856	44471
6	7.206	34.793	5	70	250.708	57513
7	10.789	54.607	4	125	589.153	135153
7	8.771	32.868	4	71	288.271	66130
7	11.046	44.046	5	88	486.538	111613
8	10.497	44.003	8	92	461.892	105959
8	8.505	22.586	1	56	192.09	44066
8	10.03	30.522	2	68	306.148	70231
CZ28312
VNC fluorescence											background fluorescence
Replicate	Area	mean	min	max	IntDen	RawIntDen	Avg Area	Avg IntDen			Replicate	Area	mean	min	max	IntDen	RawIntDen	total background (TB)	IntDen-TB (Adj)	RFU	normalized RFU
1	10.113	82.265	8	150	831.966	190855	8.48733	502.842			1	9.612	0.266	0	6	2.554	586	2.25763	500.584	58.9801	1.40868
1	9.124	49.815	7	104	454.499	104263	9.237	488.003			2	5.196	0.265	0	6	1.377	316	2.44781	485.555	52.5663	1.25549
1	6.225	35.673	3	97	222.06	50941	7.595	325.894			3	8.143	0.255	0	5	2.075	476	1.93673	323.957	42.654	1.01874
2	11.896	65.426	15	115	778.314	178547	9.404	387.289			4	11.308	0.445	0	8	5.03	1154	4.18478	383.104	40.7384	0.972993
2	9.281	49.682	14	92	461.081	105773	7.62567	245.098			5	4.895	0.376	0	5	1.84	422	2.86725	242.231	31.7652	0.758677
2	6.534	34.374	7	110	224.614	51527	11.8583	535.275			6	16.373	0.562	0	8	9.207	2112	6.66438	528.611	44.5772	1.06468
3	7.053	61.536	16	115	434.024	99566	6.36733	286.962			7	12.328	0.047	0	5	0.58	133	0.299265	286.662	45.0208	1.07527
3	8.143	30.873	8	65	251.397	57671	9.91733	426.843			8	11.665	0.366	0	6	4.268	979	3.62974	423.213	42.6741	1.01922
3	7.589	38.509	5	74	292.26	67045
4	11.617	52.025	6	112	604.379	138646
4	7.624	27.648	5	73	210.796	48357
4	8.971	38.645	9	82	346.692	79532
5	9.189	43.319	6	81	398.061	91316
5	6.7	21.514	5	48	144.144	33067
5	6.988	27.633	7	61	193.089	44295
6	13.744	59.455	7	112	817.176	187462
6	13.191	39.043	6	86	515.008	118144
6	8.64	31.672	6	73	273.642	62774
7	6.608	60.059	16	107	396.901	91050
7	6.43	31.313	7	61	201.332	46186
7	6.064	43.316	8	83	262.652	60253
8	11.299	60.408	11	111	682.548	156578
8	7.777	30.987	6	63	240.978	55281
8	10.676	33.441	6	78	357.002	81897
CZ28291
VNC fluorescence											background fluorescence
Replicate	Area	mean	min	max	IntDen	RawIntDen	Avg Area	Avg IntDen			Replicate	Area	mean	min	max	IntDen	RawIntDen	total background (TB)	IntDen-TB (Adj)	RFU	normalized RFU
1	11.813	59.044	2	117	697.508	160010	11.2627	468.976			1	5.758	3.403	0	15	19.599	4496	38.3269	430.649	38.2369	0.913246
1	12.703	32.057	4	80	407.21	93415	10.1787	380.072			2	3.017	3.353	0	14	10.113	2320	34.1291	345.943	33.987	0.811743
1	9.272	32.594	6	83	302.211	69328	13.301	514.572			3	6.591	0.343	0	7	2.258	518	4.56224	510.009	38.3437	0.915797
2	9.089	54.15	20	98	492.157	112902	8.88533	436.946			4	5.458	0.173	0	4	0.942	216	1.53716	435.409	49.0031	1.17038
2	9.86	28.534	4	87	281.353	64543	11.264	467.938			5	7.572	0.27	0	6	2.044	469	3.04128	464.896	41.2728	0.985754
2	11.587	31.649	2	76	366.705	84123	11.6897	418.237			6	6.016	0.083	0	4	0.501	115	0.970242	417.267	35.6954	0.852545
3	13.195	59.767	12	125	788.636	180915	13.3043	451.109			7	6.495	0.454	0	6	2.951	677	6.04017	445.068	33.4529	0.798986
3	16.194	25.174	2	66	407.681	93523	11.8877	616.912			8	7.184	3.036	0	14	21.813	5004	36.091	580.821	48.8591	1.16695
3	10.514	33.041	7	76	347.398	79694													Average	38.5702
4	9.459	69.4	17	128	656.476	150597													std dev	5.35051
4	8.758	36.021	12	68	315.459	72367													std error	1.89169
4	8.439	40.158	11	76	338.902	77745
5	12.371	56.765	15	112	702.255	161099
5	11.848	32.212	7	72	381.648	87551
5	9.573	33.419	9	74	319.91	73388
6	12.009	49.339	12	92	592.535	135929
6	10.619	23.349	3	62	247.944	56879
6	12.441	33.296	8	73	414.233	95026
7	13.531	50.298	7	95	680.573	156125
7	14.054	23.362	2	60	328.327	75319
7	12.328	27.939	3	67	344.426	79012
8	12.341	70.355	14	138	868.239	199176
8	10.894	38.421	8	106	418.54	96014
8	12.428	45.378	3	116	563.957	129373
CZ28292
VNC fluorescence											background fluorescence
Replicate	Area	mean	min	max	IntDen	RawIntDen	Avg Area	Avg IntDen			Replicate	Area	mean	min	max	IntDen	RawIntDen	total background (TB)	IntDen-TB (Adj)	RFU	normalized RFU
1	10.453	44.221	5	97	462.258	106043	8.82	269.168			1	5.065	0.729	0	13	3.692	847	6.42978	262.738	29.7889	0.711475
1	8.461	19.242	3	48	162.81	37349	11.8337	392.633			2	9.363	2.679	0	14	25.083	5754	31.7024	360.931	30.5003	0.728467
1	7.546	24.177	2	53	182.435	41851	12.4757	311.256			3	7.232	2.492	0	13	18.021	4134	31.0894	280.166	22.457	0.536361
2	13.579	49.528	6	103	672.526	154279	11.0897	364.706			4	6.739	2.609	0	13	17.58	4033	28.9329	335.773	30.278	0.723157
2	9.686	22.258	0	57	215.595	49458	8.95833	291.966			5	9.433	0.4	0	5	3.775	866	3.58333	288.383	32.1916	0.76886
2	12.236	23.682	1	58	289.779	66476	10.6803	292.983			6	7.411	0.423	0	6	3.134	719	4.51778	288.465	27.009	0.64508
3	13.356	38.43	7	82	513.282	117748	8.473	255.939			7	10.192	0.259	0	7	2.637	605	2.19451	253.745	29.9475	0.715262
3	11.334	17.291	2	45	195.975	44957	9.949	330.219			8	14.036	0.274	0	6	3.845	882	2.72603	327.493	32.9172	0.78619
3	12.737	17.626	2	42	224.51	51503													Average	29.3862
4	12.149	50.566	0	101	614.327	140928													std dev	3.30619
4	9.603	22.541	2	66	216.463	49657													std error	1.16892
4	11.517	22.864	2	61	263.328	60408
5	8.784	46.627	16	88	409.556	93953
5	7.376	21.732	4	56	160.29	36771
5	10.715	28.563	5	75	306.052	70209
6	13.37	38.868	2	83	519.65	119209
6	9.634	17.024	0	61	164.004	37623
6	9.037	21.612	3	51	195.294	44801
7	6.661	48.052	11	102	320.067	73424
7	8.348	21.901	2	61	182.823	41940
7	10.41	25.45	4	64	264.928	60775
8	11.765	49.046	7	94	577.043	132375
8	9.743	21.609	2	53	210.525	48295
8	8.339	24.354	4	52	203.089	46589
CZ28278
VNC fluorescence											background fluorescence
Replicate	Area	mean	min	max	IntDen	RawIntDen	Avg Area	Avg IntDen			Replicate	Area	mean	min	max	IntDen	RawIntDen	total background (TB)	IntDen-TB (Adj)	RFU	normalized RFU
1	11.735	141.396	29	239	1659.26	380638	10.2773	901.809			1	5.344	2.724	0	16	14.56	3340	27.9955	873.814	85.0234	1.19634
1	10.344	62.877	10	123	650.421	149208	9.95767	724.994			2	8.056	0.921	0	11	7.419	1702	9.17101	715.823	71.8867	1.0115
1	8.753	45.212	5	95	395.746	90785	6.93567	532.697			3	3.265	0.542	0	6	1.77	406	3.75913	528.938	76.2635	1.07308
2	9.804	89.669	19	156	879.089	201665	6.29433	492.233			4	6.129	1.319	0	9	8.086	1855	8.30223	483.931	76.8836	1.08181
2	9.093	61.261	15	129	557.061	127791	9.83267	677.744			5	6.373	0.505	0	9	3.217	738	4.9655	672.779	68.4228	0.962758
2	10.976	67.311	20	122	738.833	169490	8.49	377.068			6	2.005	0.748	0	7	1.5	344	6.35052	370.718	43.6652	0.614402
3	8.583	82.934	6	159	711.841	163298	10.3633	742.193			7	7.411	1.169	0	9	8.666	1988	12.1147	730.078	70.4482	0.991257
3	5.493	58.169	16	115	319.495	73293	12.409	945.342			8	7.354	0.219	0	6	1.609	369	2.71757	942.625	75.963	1.06885
3	6.731	84.207	24	142	566.755	130015													Average	71.0695
4	5.296	113.549	36	180	601.398	137962													std dev	12.9815
4	6.011	51.559	13	107	309.936	71100													std error	4.90656
4	7.576	74.624	2	146	565.365	129696
5	7.563	100.633	27	180	761.104	174599
5	10.375	53.369	12	159	553.691	127018
5	11.56	62.146	15	112	718.437	164811
6	6.151	73.055	14	133	449.346	103081
6	9.254	30.394	4	75	281.279	64526
6	10.065	39.798	8	82	400.58	91894
7	8.383	119.068	19	196	998.107	228968
7	9.542	48.259	8	98	460.501	105640
7	13.165	58.336	8	116	767.97	176174
8	13.753	98.414	12	192	1353.5	310495
8	11.225	63.81	15	145	716.261	164312
8	12.249	62.557	5	141	766.27	175784
CZ28311
VNC fluorescence											background fluorescence
Replicate	Area	mean	min	max	IntDen	RawIntDen	Avg Area	Avg IntDen			Replicate	Area	mean	min	max	IntDen	RawIntDen	total background (TB)	IntDen-TB (Adj)	RFU	normalized RFU
1	5.567	95.519	38	153	531.721	121978	6.273	432.213			1	9.991	1.462	0	13	14.612	3352	9.17113	423.042	67.4385	0.948909
1	5.384	54.483	9	117	293.31	67286	9.88367	648.768			2	6.992	0.252	0	6	1.765	405	2.49068	646.278	65.3885	0.920063
1	7.868	59.938	19	139	471.608	108188	10.6857	748.939			3	7.162	0.536	0	10	3.84	881	5.72752	743.211	69.5522	0.97865
2	11.399	86.733	3	153	988.682	226806	10.7437	591.796			4	10.357	4.145	0	17	42.933	9849	44.5325	547.264	50.9382	0.716738
2	8.88	49.362	14	114	438.313	100550	8.09333	513.03			5	12.79	3.982	0	17	50.932	11684	32.2277	480.803	59.4073	0.835903
2	9.372	55.41	14	147	519.31	119131	8.881	614.199			6	6.26	0.942	0	8	5.898	1353	8.3659	605.833	68.2168	0.95986
3	10.898	100.32	15	161	1093.27	250799	10.1467	620.937			7	3.33	0.949	0	8	3.16	725	9.62919	611.307	60.2471	0.847721
3	9.503	51.91	11	122	493.299	113164	7.14433	534.573			8	3.304	0.92	0	7	3.038	697	6.57279	528.001	73.9048	1.03989
3	11.656	56.642	20	103	660.246	151462													Average	64.3867	0.905967
4	9.481	87.004	1	163	824.896	189233													std dev	7.22155
4	10.087	38.694	7	101	390.306	89537													std error	2.17738
4	12.663	44.237	8	88	560.186	128508
5	7.123	100.343	18	168	714.731	163961
5	7.855	48.514	14	94	381.086	87422
5	9.302	47.651	6	105	443.274	101688
6	7.947	101.506	46	175	806.64	185045
6	8.208	46.725	8	106	383.531	87983
6	10.488	62.206	21	132	652.426	149668
7	9.708	86.061	27	153	835.467	191658
7	9.202	47.624	6	109	438.243	100534
7	11.53	51.093	16	95	589.1	135141
8	8.099	93.784	25	157	759.587	174251
8	5.453	50.338	13	102	274.509	62973
8	7.881	72.275	14	190	569.624	130673
