# Supplementary material for: Eukaryotic initiation factor EIF-3.G augments mRNA translation efficiency to regulate neuronal activity
Source: eLife. 2021 Jul 29;10:e68336. doi: 10.7554/eLife.68336 (PMC8354637; doi:10.7554/eLife.68336)
Supplement: Figure 7—figure supplement 1—source data 2. [file elife-68336-fig7-figsupp1-data2.xlsx]

## Sheet: Fig7- fig supp 1C
CZ28278
VNC fluorescence											background fluorescence
Replicate	Area	mean	min	max	IntDen	RawIntDen	Avg Area	Avg IntDen			Replicate	Area	mean	min	max	IntDen	RawIntDen	total background (TB)	IntDen-TB (Adj)	RFU	normalized RFU
1	11.735	141.396	29	239	1659.26	380638	10.2773	901.809			1	5.344	2.724	0	16	14.56	3340	27.9955	873.814	85.0234	#DIV/0!
1	10.344	62.877	10	123	650.421	149208	9.95767	724.994			2	8.056	0.921	0	11	7.419	1702	9.17101	715.823	71.8867	#DIV/0!
1	8.753	45.212	5	95	395.746	90785	6.93567	532.697			3	3.265	0.542	0	6	1.77	406	3.75913	528.938	76.2635	#DIV/0!
2	9.804	89.669	19	156	879.089	201665	6.29433	492.233			4	6.129	1.319	0	9	8.086	1855	8.30223	483.931	76.8836	#DIV/0!
2	9.093	61.261	15	129	557.061	127791	9.83267	677.744			5	6.373	0.505	0	9	3.217	738	4.9655	672.779	68.4228	#DIV/0!
2	10.976	67.311	20	122	738.833	169490	8.49	377.068			6	2.005	0.748	0	7	1.5	344	6.35052	370.718	43.6652	#DIV/0!
3	8.583	82.934	6	159	711.841	163298	10.3633	742.193			7	7.411	1.169	0	9	8.666	1988	12.1147	730.078	70.4482	#DIV/0!
3	5.493	58.169	16	115	319.495	73293	12.409	945.342			8	7.354	0.219	0	6	1.609	369	2.71757	942.625	75.963	#DIV/0!
3	6.731	84.207	24	142	566.755	130015													Average	71.0695
4	5.296	113.549	36	180	601.398	137962													std dev	12.9815
4	6.011	51.559	13	107	309.936	71100													std error	4.90656
4	7.576	74.624	2	146	565.365	129696
5	7.563	100.633	27	180	761.104	174599
5	10.375	53.369	12	159	553.691	127018
5	11.56	62.146	15	112	718.437	164811
6	6.151	73.055	14	133	449.346	103081
6	9.254	30.394	4	75	281.279	64526
6	10.065	39.798	8	82	400.58	91894
7	8.383	119.068	19	196	998.107	228968
7	9.542	48.259	8	98	460.501	105640
7	13.165	58.336	8	116	767.97	176174
8	13.753	98.414	12	192	1353.5	310495
8	11.225	63.81	15	145	716.261	164312
8	12.249	62.557	5	141	766.27	175784
CZ28311
VNC fluorescence											background fluorescence
Replicate	Area	mean	min	max	IntDen	RawIntDen	Avg Area	Avg IntDen			Replicate	Area	mean	min	max	IntDen	RawIntDen	total background (TB)	IntDen-TB (Adj)	RFU	normalized RFU
1	5.567	95.519	38	153	531.721	121978	6.273	432.213			1	9.991	1.462	0	13	14.612	3352	9.17113	423.042	67.4385	0.948909
1	5.384	54.483	9	117	293.31	67286	9.88367	648.768			2	6.992	0.252	0	6	1.765	405	2.49068	646.278	65.3885	0.920063
1	7.868	59.938	19	139	471.608	108188	10.6857	748.939			3	7.162	0.536	0	10	3.84	881	5.72752	743.211	69.5522	0.97865
2	11.399	86.733	3	153	988.682	226806	10.7437	591.796			4	10.357	4.145	0	17	42.933	9849	44.5325	547.264	50.9382	0.716738
2	8.88	49.362	14	114	438.313	100550	8.09333	513.03			5	12.79	3.982	0	17	50.932	11684	32.2277	480.803	59.4073	0.835903
2	9.372	55.41	14	147	519.31	119131	8.881	614.199			6	6.26	0.942	0	8	5.898	1353	8.3659	605.833	68.2168	0.95986
3	10.898	100.32	15	161	1093.27	250799	10.1467	620.937			7	3.33	0.949	0	8	3.16	725	9.62919	611.307	60.2471	0.847721
3	9.503	51.91	11	122	493.299	113164	7.14433	534.573			8	3.304	0.92	0	7	3.038	697	6.57279	528.001	73.9048	1.03989
3	11.656	56.642	20	103	660.246	151462													Average	64.3867
4	9.481	87.004	1	163	824.896	189233													std dev	7.22155
4	10.087	38.694	7	101	390.306	89537													std error	2.17738
4	12.663	44.237	8	88	560.186	128508
5	7.123	100.343	18	168	714.731	163961
5	7.855	48.514	14	94	381.086	87422
5	9.302	47.651	6	105	443.274	101688
6	7.947	101.506	46	175	806.64	185045
6	8.208	46.725	8	106	383.531	87983
6	10.488	62.206	21	132	652.426	149668
7	9.708	86.061	27	153	835.467	191658
7	9.202	47.624	6	109	438.243	100534
7	11.53	51.093	16	95	589.1	135141
8	8.099	93.784	25	157	759.587	174251
8	5.453	50.338	13	102	274.509	62973
8	7.881	72.275	14	190	569.624	130673
CZ28293
VNC fluorescence											background fluorescence
Replicate	Area	mean	min	max	IntDen	RawIntDen	Avg Area	Avg IntDen			Replicate	Area	mean	min	max	IntDen	RawIntDen	total background (TB)	IntDen-TB (Adj)	RFU	normalized RFU
1	10.309	99.067	11	175	1021.32	234293	10.4067	738.933			1	5.344	1.103	0	9	5.894	1352	11.4786	727.455	69.9028	0.983583
1	10.366	49.325	10	91	511.303	117294	11.1403	716.659			2	4.73	0.418	0	6	1.979	454	4.65666	712.003	63.9122	0.89929
1	10.545	64.883	26	113	684.178	156952	9.596	509.397			3	3.954	3.118	0	14	12.328	2828	29.9203	479.476	49.9663	0.703062
2	12.951	86.23	1	164	1116.77	256189	13.5267	767.604			4	4.808	0.368	0	6	1.77	406	4.97781	762.626	56.3794	0.7933
2	9.664	47.028	13	120	454.494	104262	14.8807	837.7			5	6.125	1.216	0	11	7.45	1709	18.0949	819.605	55.0785	0.774995
2	10.806	53.553	10	143	578.717	132759	13.6777	825.291			6	4.333	0.884	0	7	3.832	879	12.0911	813.2	59.4546	0.83657
3	8.775	80.371	19	146	705.255	161787	13.426	785.401			7	3.313	0.42	0	7	1.391	319	5.63892	779.762	58.0785	0.817207
3	10.126	43.981	12	136	445.362	102167	9.78467	588.306			8	8.217	1.268	0	9	10.418	2390	12.407	575.899	58.8573	0.828165
3	9.887	38.19	9	84	377.573	86616													Average	58.9537	0.829521
4	15.196	79.418	13	144	1206.84	276852													std dev	5.95113
4	11.735	35.458	9	98	416.099	95454													std error	1.88191
4	13.649	49.813	6	100	679.871	155964
5	16.539	80.355	5	150	1328.97	304868
5	12.977	37.256	6	113	483.483	110912
5	15.126	46.32	10	122	700.651	160731
6	14.137	88	24	173	1244.03	285383
6	12.947	44.592	11	129	577.322	132439
6	13.949	46.922	10	112	654.523	150149
7	14.032	75.976	14	132	1066.1	244566
7	11.194	43.046	6	103	481.87	110542
7	15.052	53.695	10	118	808.231	185410
8	9.058	87.963	21	166	796.801	182788
8	8.67	43.099	5	84	373.684	85724
8	11.626	51.13	4	128	594.432	136364
CZ28294
VNC fluorescence											background fluorescence
Replicate	Area	mean	min	max	IntDen	RawIntDen	Avg Area	Avg IntDen			Replicate	Area	mean	min	max	IntDen	RawIntDen	total background (TB)	IntDen-TB (Adj)	RFU	normalized RFU
1	9.538	113.043	38	194	1078.18	247337	10.1947	732.473			1	3.749	1.586	0	10	5.946	1364	16.1687	716.304	70.2626	0.988647
1	10.074	48.363	11	97	487.21	111767	8.698	502.031			2	17.062	0.826	0	10	14.089	3232	7.18455	494.846	56.8919	0.800511
1	10.972	57.604	13	104	632.029	144989	11.11	606.37			3	8.771	0.469	0	6	4.111	943	5.21059	601.159	54.1098	0.761364
2	9.398	92.308	12	172	867.541	199016	7.83633	521.821			4	10.523	0.679	0	7	7.145	1639	5.32087	516.5	65.911	0.927416
2	8.326	41.872	9	78	348.628	79976	16.4267	1083.33			5	4.176	0.32	0	6	1.338	307	5.25653	1078.07	65.6295	0.923454
2	8.37	34.64	9	67	289.923	66509	12.0417	986.714			6	12.345	1.038	0	11	12.816	2561	12.4992	974.215	80.9037	1.13837
3	9.642	80.339	15	155	774.661	177709	12.7357	1099.61			7	3.234	0.487	0	7	1.574	361	6.20227	1093.41	85.8542	1.20803
3	13.496	41.649	8	93	562.087	128944	11.2653	955.511			8	6.853	1.125	0	12	7.707	1768	12.6735	942.837	83.6937	1.17763
3	10.192	47.329	17	89	482.362	110655													Average	70.407
4	8.03	96.519	18	185	775.005	177788													std dev	7.56627
4	8.073	46.427	4	111	374.809	85982													std error	2.52209
4	7.406	56.122	19	111	415.65	95351
5	15.728	87.468	15	166	1375.69	315586
5	16.342	51.188	9	137	836.539	191904
5	17.21	60.3	6	118	1037.76	238065
6	11.97	122.476	15	226	1466.02	292962
6	9.648	57.663	17	124	556.334	111175
6	14.507	64.644	5	140	937.789	187403
7	10.758	127.929	11	213	1376.32	315730
7	13.526	56.967	8	136	770.559	176768
7	13.923	82.737	12	154	1151.96	264263
8	9.119	131.651	53	222	1200.57	275413
8	11.181	56.465	16	155	631.345	144832
8	13.496	76.661	25	155	1034.62	237344
