# Supplementary material for: Eukaryotic initiation factor EIF-3.G augments mRNA translation efficiency to regulate neuronal activity
Source: eLife. 2021 Jul 29;10:e68336. doi: 10.7554/eLife.68336 (PMC8354637; doi:10.7554/eLife.68336)
Supplement: Figure 7—source data 1. — Quantification of relative fluorescence intensity in strains of the indicated genotypes. [file elife-68336-fig7-data1.xlsx]

## Sheet: Figure 7B
juSi260; ncs-2								juSi260 background
Replicate	Area	mean	min	max	IntDen	RawIntDen		Replicate	Area	mean	min	max	IntDen	RawIntDen	total background (TB)	IntDen-TB (Adj)	RFU	normalized RFU
1	204.95	100.2	1	255	20536	523446		1	66.146	0.368	0	10	24.363	621	75.4216	20460.6	99.8322	0.905604
2	313.074	104.093	2	255	32588.9	830663		2	162.932	1.099	0	16	179.135	4566	344.068	32244.8	102.994	0.934287
3	202.831	99.944	1	255	20271.8	516710		3	103.574	0.174	0	9	18.008	459	35.2926	20236.5	99.7701	0.90504
4	99.454	144.271	8	255	14348.3	365726		4	141.55	0.778	0	9	110.125	2807	77.3752	14270.9	143.493	1.30166
5	126.917	99.084	1	209	12575.4	320536		5	187.374	0.419	0	8	78.426	1999	53.1782	12522.2	98.6646	0.895012
6	185.216	122.192	0	255	22632	576870		6	195.377	0.287	0	6	56.063	1429	53.157	22578.8	121.905	1.10584
7	206.715	115.45	3	255	23865.3	608307		7	227.862	0.404	0	12	91.961	2344	83.5129	23781.8	115.046	1.04362
8	272.94	100.635	5	255	27467.3	700117		8	209.815	0.434	0	6	91.137	2323	118.456	27348.8	100.201	0.908947
																	110.238
ju807; juSi260								ju807; juSi260 background
Replicate	Area	mean	min	max	IntDen	RawIntDen		Replicate	Area	mean	min	max	IntDen	RawIntDen	total background (TB)	IntDen-TB (Adj)	RFU	normalized RFU
1	199.34	106.927	2	252	21314.7	543294		1	134.41	0.576	0	9	77.445	1974	114.82	21199.9	106.35	0.964732
2	163.442	106.645	5	255	17430.2	444281		2	67.48	0.127	0	8	8.592	219	20.7571	17409.4	106.518	0.966248
3	110.831	87.833	1	194	9734.69	248129		3	223.782	0.313	0	8	69.991	1784	34.6901	9700	87.5207	0.793922
4	155.517	106.785	1	255	16606.8	423294		4	68.107	0.633	0	8	43.116	1099	98.4423	16508.4	106.152	0.962929
5	105.143	113.091	17	242	11890.7	303083		5	120.993	0.497	0	7	60.104	1532	52.2561	11838.4	112.593	1.02136
6	326.767	104.611	4	221	34183.3	871303		6	103.652	0.941	0	10	97.571	2487	307.488	33875.8	103.67	0.940414
7	372.551	95.143	0	225	35445.6	903479		7	169.798	0.047	0	4	7.925	202	17.5099	35428.1	95.0961	0.862641
8	244.379	90.956	1	219	22227.6	566563		8	495.584	0.062	0	8	30.758	784	15.1515	22212.5	90.8935	0.824518
n2420; juSi260								ju807; juSi260 background
Replicate	Area	mean	min	max	IntDen	RawIntDen		Replicate	Area	mean	min	max	IntDen	RawIntDen	total background (TB)	IntDen-TB (Adj)	RFU	normalized RFU
1	185.608	107.241	0	237	19904.9	507358		1	93.059	0.744	0	6	69.245	1765	138.092	19766.8	106.497	0.966065
2	135.862	116.332	7	223	15805	402857		2	38.291	0.672	0	7	25.736	656	91.2993	15713.7	115.66	1.04918
3	125.112	103.235	2	208	12916	329217		3	114.872	0.265	0	5	30.405	775	33.1547	12882.8	102.97	0.934069
4	183.333	105.04	1	210	19257.3	490851		4	81.917	0.463	0	7	37.898	966	84.8832	19172.4	104.577	0.948643
5	176.663	101.393	4	244	17912.4	456572		5	65.597	0.499	0	9	32.72	834	88.1548	17824.3	100.894	0.915236
6	143.198	114.778	6	222	16436.1	418941		6	138.137	0.667	0	10	92.118	2348	95.5131	16340.5	114.112	1.03513
7	186.707	118.79	3	248	22178.9	565322		7	79.328	0.276	0	6	21.931	559	51.5311	22127.4	118.514	1.07507
8	216.955	112.842	3	241	24481.6	624015		8	32.288	0.804	0	10	25.972	662	174.432	24307.2	112.038	1.01632
ju807; n2420; juSi260								ju807; n2420; juSi260 background
Replicate	Area	mean	min	max	IntDen	RawIntDen		Replicate	Area	mean	min	max	IntDen	RawIntDen	total background (TB)	IntDen-TB (Adj)	RFU	normalized RFU
1	174.78	74.429	0	210	13008.7	331580		1	237.591	0.55	0	12	130.683	3331	96.129	12912.5	73.8789	0.670174
2	304.522	61.68	0	243	18783	478762		2	103.652	0.718	0	10	74.463	1898	218.647	18564.3	60.9622	0.553004
3	189.375	84.502	1	251	16002.5	407890		3	44.882	0.351	0	6	15.771	402	66.4706	15936	84.1506	0.763352
4	259.051	106.98	2	255	27713.4	706392		4	139.079	0.748	0	10	104.044	2652	193.77	27519.7	106.233	0.963664
5	294.871	69.554	0	226	20509.5	522770		5	128.447	0.48	0	8	61.595	1570	141.538	20368	69.0742	0.62659
6	193.298	83.698	0	236	16178.7	412382		6	120.914	1.084	0	11	131.115	3342	209.535	15969.2	82.6144	0.749416
7	187.295	84.732	0	235	15869.9	404509		7	68.264	0.703	0	7	47.981	1223	131.668	15738.2	84.0289	0.762247
8	220.251	86.64	1	244	19082.6	486399		8	338.654	0.674	0	9	228.411	5822	148.449	18934.1	85.9662	0.779822
