# Supplementary material for: Eukaryotic initiation factor EIF-3.G augments mRNA translation efficiency to regulate neuronal activity
Source: eLife. 2021 Jul 29;10:e68336. doi: 10.7554/eLife.68336 (PMC8354637; doi:10.7554/eLife.68336)
Supplement: Figure 7—source data 2. — Quantification of relative fluorescence intensity in the indicated strains. [file elife-68336-fig7-data2.xlsx]

## Sheet: Figure 7C
CZ28213								CZ28213 background
Replicate	Area	mean	min	max	IntDen	RawIntDen		Replicate	Area	mean	min	max	IntDen	RawIntDen	total background (TB)	IntDen-TB (Adj)	RFU	normalized RFU
1	215.778	104.131	3	238	22469.2	572720		1	52.101	1.383	0	10	72.031	1836	298.421	22170.8	102.748	1.04364
2	290.398	103.128	0	255	29948.2	763353		2	52.885	1.158	0	8	61.242	1561	336.281	29611.9	101.97	1.03574
3	228.803	102.914	2	225	23547.1	600196		3	91.019	0.423	0	8	38.526	982	96.7837	23450.3	102.491	1.04103
4	260.032	91.459	5	203	23782.2	606189		4	43.469	0.417	0	6	18.125	462	108.433	23673.8	91.0419	0.924737
5	210.953	99.136	4	202	20912.9	533053		5	90.391	0.795	0	7	71.874	1832	167.708	20745.2	98.3406	0.998871
6	179.841	104.739	11	204	18836.4	480123		6	44.411	0.864	0	7	38.369	978	155.383	18681	103.875	1.05509
7	173.643	95.411	4	198	16567.5	422291		7	62.458	1.341	0	11	83.761	2135	232.855	16334.6	94.0702	0.955496
8	294.596	93.552	0	203	27560.1	702484		8	128.447	0.476	0	13	61.203	1560	140.228	27419.9	93.0763	0.945401
																	98.4517
CZ28340								CZ28340 background
Replicate	Area	mean	min	max	IntDen	RawIntDen		Replicate	Area	mean	min	max	IntDen	RawIntDen	total background (TB)	IntDen-TB (Adj)	RFU	normalized RFU
1	270.86	103.944	3	227	28154.3	717629		1	66.695	0.344	0	7	22.912	584	93.1758	28061.1	103.6	1.05229
2	426.103	89.723	4	200	38231.2	974480		2	41.272	1.278	0	12	52.728	1344	544.56	37686.6	88.4449	0.898358
3	354.582	88.139	13	169	31252.5	796599		3	68.421	0.403	0	7	27.58	703	142.897	31109.6	87.7359	0.891158
4	363.37	92.349	8	229	33557	855338		4	113.107	1.111	0	14	125.622	3202	403.704	33153.2	91.2383	0.926732
5	204.362	121.909	12	230	24913.6	635026		5	13.339	0.765	0	6	10.2	260	156.337	24757.3	121.144	1.23049
6	327.983	95.917	1	222	31459	801862		6	107.418	1.52	0	10	163.246	4161	498.534	30960.4	94.3964	0.95881
7	249.361	110.351	5	236	27517.3	701393		7	62.379	1.474	0	12	91.961	2344	367.558	27149.8	108.877	1.1059
8	335.672	97.343	2	236	32675.2	832864		8	34.132	0.241	0	7	8.239	210	80.897	32594.3	97.1018	0.986289
CZ28252								CZ28252 background
Replicate	Area	mean	min	max	IntDen	RawIntDen		Replicate	Area	mean	min	max	IntDen	RawIntDen	total background (TB)	IntDen-TB (Adj)	RFU	normalized RFU
1	169.052	116.496	4	226	19693.9	501981		1	136.372	0.944	0	11	128.8	3283	159.585	19534.3	115.552	1.17369
2	144.257	110.663	2	208	15963.9	406907		2	80.191	1.297	0	18	104.005	2651	187.101	15776.8	109.366	1.11086
3	132.998	103.103	7	206	13712.4	349518		3	95.649	0.907	0	11	86.782	2212	120.629	13591.8	102.195	1.03803
4	197.888	98.606	0	211	19513	497369		4	249.047	0.542	0	10	135.038	3442	107.255	19405.7	98.0642	0.996064
5	190.787	96.223	0	223	18358.1	467932		5	87.959	1.112	0	10	97.846	2494	212.155	18145.9	95.111	0.966068
6	251.205	94.614	0	226	23767.5	605813		6	67.48	0.874	0	8	59.006	1504	219.553	23547.9	93.7399	0.952142
7	235.394	94.809	3	228	22317.4	568852		7	145.474	0.754	0	7	109.655	2795	177.487	22139.9	94.0548	0.95534
8	224.174	104.891	1	247	23513.9	599350		8	67.166	0.372	0	6	24.991	637	83.3927	23430.5	104.519	1.06163
CZ28253								CZ28253 background
Replicate	Area	mean	min	max	IntDen	RawIntDen		Replicate	Area	mean	min	max	IntDen	RawIntDen	total background (TB)	IntDen-TB (Adj)	RFU	normalized RFU
1	203.067	88.951	4	197	18063.1	460412		1	59.79	1.115	0	9	66.656	1699	226.42	17836.6	87.8362	0.892176
2	170.543	93.956	1	175	16023.6	408427		2	75.169	0.963	0	9	72.384	1845	164.233	15859.3	92.9932	0.944557
3	205.97	89.223	13	188	18377.3	468422		3	73.953	0.399	0	7	29.542	753	82.182	18295.1	88.8243	0.902212
4	165.482	106.583	8	184	17637.5	449565		4	38.997	0.836	0	7	32.602	831	138.343	17499.2	105.747	1.0741
5	187.805	91.358	6	185	17157.5	437330		5	22.009	0.717	0	7	15.771	402	134.656	17022.8	90.6411	0.920666
6	245.085	95.42	2	187	23385.9	596087		6	71.56	0.742	0	10	53.121	1354	181.853	23204.1	94.6776	0.961666
7	198.202	103.163	5	202	20447.2	521181		7	55.71	0.103	0	7	5.728	146	20.4148	20426.8	103.06	1.04681
8	321.274	94.004	1	203	30201	769798		8	22.598	0.587	0	9	13.261	338	188.588	30012.4	93.4169	0.948861
